# Supplementary material for: SPOP targets the immune transcription factor IRF1 for proteasomal degradation
Source: eLife. 2023 Aug 25;12:e89951. doi: 10.7554/eLife.89951 (PMC10491434; doi:10.7554/eLife.89951)
Supplement: Supplementary file 2. [file elife-89951-supp2.xlsx]

## Sheet: Reagents
Reagent	Description	Abbreviation	Application	Dilution/concentration	Manufacturer	Catalogue number
LPS	IFNγ human recombinant	IFNγ	Cell culture	10 ng/mL	Enzo	ENZ-PRT141-0100
	Cycloheximide	CHX	Cell culture	40 μg/mL	Sigma-Aldrich	C1988
	MG132	MG132	Cell culture	10 μM	Sigma-Aldrich	M7449
	Epoxomicin	EPX	Cell culture	10 μM	Gentaur Molecular Products	607-A2606
	Bafilomycin A1	Baf	Cell culture	0.4 μM	InvivoGen	tlrl-baf1
	Doxycycline hyclate	DOX	Cell culture	500 ng/mL	Sigma-Aldrich	D9891
	G418 disulfate salt	G418	Cell culture	0.5-1 mg/mL	Sigma-Aldrich	A1720
	Benzonase® Nuclease		IP	250 U/µl	Merck	70746
