# Supplementary material for: SPOP targets the immune transcription factor IRF1 for proteasomal degradation
Source: eLife. 2023 Aug 25;12:e89951. doi: 10.7554/eLife.89951 (PMC10491434; doi:10.7554/eLife.89951)
Supplement: Supplementary file 3. [file elife-89951-supp3.xlsx]

## Sheet: Plasmids
Plasmid	Purpose	Reference or source
SFFV-pLX303-MYC-mCherry-IRF1-P2A-eBFP2	mCherry-IRF1 expression	This study
SFFV-pLX303-MYC-mCherry-IRF1-SBDmut.-P2A-eBFP2	mCherry-IRF1 binding mutant expression	This study
SFFV-pLX303-MYC-mCherry-P2A-3xHA-IRF1	IRF1 expression/ Immunofluorescence	This study
SFFV-pLX303-MYC-mCherry-P2A-3xHA-IRF1-DBD1	KtoR mutant	This study
SFFV-pLX303-MYC-mCherry-P2A-3xHA-IRF1-DBD2	KtoR mutant	This study
SFFV-pLX303-MYC-mCherry-P2A-3xHA-IRF1-NLS	KtoR mutant	This study
SFFV-pLX303-MYC-mCherry-P2A-3xHA-IRF1-C-term.	KtoR mutant	This study
SFFV-pLX303-MYC-mCherry-P2A-3xHA-IRF1-allKtoR	KtoR mutant	This study
SFFV-pLX303-MYC-mCherry-cMYC-P2A-eBFP2	cMYC expression	This study
SFFV-pLX303-MYC-mCherry-P2A-Ollas-SPOP	SPOP expression	This study
SFFV-pLX303-MYC-mCherry-P2A-Ollas-SPOP-MATHmut.	SPOP mutant expression	This study
lentiCas9-EGFP	Cas9 expression	Addgene_63592
pLentiv2-U6-PGK-iRFP670-P2A-Neo	single sgRNA expression	de Almeida M, Hinterndorfer M et al, Nature 2021
pLentiv2-U6-PGK-eBFP2-P2A-Neo	single sgRNA expression	de Almeida M, Hinterndorfer M et al, Nature 2021
PRRL-PBS-U6-sgRNA-EF1as-Thy1-P2A-NeoR (sgETN)	Library sgRNA expression	Johannes Zuber, IMP
SFFV-pLX303-MYC-IRF1	Immunofluorescence	This study
SFFV-pLX303-FLAG-SPOP	Immunofluorescence	This study
