# Supplementary material for: SPOP targets the immune transcription factor IRF1 for proteasomal degradation
Source: eLife. 2023 Aug 25;12:e89951. doi: 10.7554/eLife.89951 (PMC10491434; doi:10.7554/eLife.89951)
Supplement: Supplementary file 4. [file elife-89951-supp4.xlsx]

## Sheet: sgRNA sequences
Gene	Species	Sequence (5' to 3')
AAVS1	human	CACCGCTGTGCCCCGATGCACAC
SPOP1	human	CACCTTTGTGCAAGGCAAAGACTG
SPOP2	human	CACCGCACCAACTCTCAGCTACG
SPOP3	human	CACCGAGCAAATGATAAACTGAAA
SPOP4	human	CACCGTTTGCGAGTAAACCCCAAA
SPOP5	human	CACCCAAGCTTACCCTCTTCTGCG
SPOP6	human	CACCGCGCTTAAAGGTCATGTGTG
SPOP7	human	CACCGGCTGGCAGATGAGTTAGG
FBXW7	human	CACCGAGAAGAAAAGTAATAAAACC
RRMI	human	CACCGTACAGTGGGGTCACCACAG
UBE3C	human	CACCGAAGCTGCCTTACCAAAA
VCP	human	CACCGAACAAGTATCATCAGAA
IRF1	human	GCTAAGAGCAAGGCCAAG
IRF3_1	human	GATCTGATTACCTTCACGGA
IRF3_2	human	GTCCACAGTATTCTCCAGGG
STAT1_1	human	GACGTTGGAGATCACCACAA
STAT1_2	human	GTCCACCAATGGCAGTCTGG
