# Supplementary material for: SPOP targets the immune transcription factor IRF1 for proteasomal degradation
Source: eLife. 2023 Aug 25;12:e89951. doi: 10.7554/eLife.89951 (PMC10491434; doi:10.7554/eLife.89951)
Supplement: Supplementary file 5. [file elife-89951-supp5.xlsx]

## Sheet: Cell lines
Cell lines and primary cells	Type	Reference or source	Purpose	Media	Supplements
RKO	human rectal carcinoma	CRL-2577	parental cell line	RPMI-1640 (Thermo Fisher Scientific, 21875)	8.6% FBS (Sigma-Aldrich, F7524), L-glutamine (3.5 mM, Gibco), sodium pyruvate (1.7 mM, Sigma-Aldrich), and 0.9% penicillin/streptomycin (Sigma-Aldrich, P4333)
RKO	human colon carcinoma	de Almeida M, Hinterndorfer M et al, Nature 2021	Dox-inducible Cas9	RPMI 1640 (Thermo Fisher Scientific, 21875)	8.6% FBS (Sigma-Aldrich, F7524), L-glutamine (3.5 mM, Gibco), sodium pyruvate (1.7 mM, Sigma-Aldrich), and 0.9% penicillin/streptomycin (Sigma-Aldrich, P4333)
RKO-dox-Cas9	human rectal carcinoma	de Almeida M, Hinterndorfer M et al, Nature 2021	Dox-inducible Cas9	RPMI 1640 (Thermo Fisher Scientific, 21875)	8.6% FBS (Sigma-Aldrich, F7524), L-glutamine (3.5 mM, Gibco), sodium pyruvate (1.7 mM, Sigma-Aldrich), and 0.9% penicillin/streptomycin (Sigma-Aldrich, P4333)
RKO-dox-Cas9 mCherry-IRF1-P2A-BFP	human rectal carcinoma	This study	mCherry-IRF1 reporter	RPMI 1640 (Thermo Fisher Scientific, 21875)	8.6% FBS (Sigma-Aldrich, F7524), L-glutamine (3.5 mM, Gibco), sodium pyruvate (1.7 mM, Sigma-Aldrich), and 0.9% penicillin/streptomycin (Sigma-Aldrich, P4333)
RKO-dox-Cas9 mCherry-cMYC-P2A-BFP	human rectal carcinoma	This study	mCherry-cMYC reporter	RPMI 1640 (Thermo Fisher Scientific, 21875)	8.6% FBS (Sigma-Aldrich, F7524), L-glutamine (3.5 mM, Gibco), sodium pyruvate (1.7 mM, Sigma-Aldrich), and 0.9% penicillin/streptomycin (Sigma-Aldrich, P4333)
HEK293T	human kidney neural tissue	CRL-3216	IRF1-SBDmut. SPOP-MATHmut. Transfection	Dulbecco’s modified Eagle’s medium (DMEM; Sigma-Aldrich, D6429)	8.6% FBS (Sigma-Aldrich, F7524) and 0.9% penicillin/streptomycin (Sigma-Aldrich, P4333)
Lenti-X 293T	human kidney neural tissue	Takara, Cat# 632180	VLP production	Dulbecco’s modified Eagle’s medium (DMEM; Sigma-Aldrich, D6429)	8.6% FBS (Sigma-Aldrich, F7524) and 0.9% penicillin/streptomycin (Sigma-Aldrich, P4333)
HeLa	human cervical adenocarcinoma	CCL-2	Immunofluorescence microscopy	Dulbecco’s modified Eagle’s medium (DMEM; Sigma-Aldrich, D6429)	8.6% FBS (Sigma-Aldrich, F7524) and 0.9% penicillin/streptomycin (Sigma-Aldrich, P4333)
MEF	mouse embryonic fibroblasts	Mikula M, EMBO J, 2001	Validation on endogenous IRF1	Dulbecco’s modified Eagle’s medium (DMEM; Sigma-Aldrich, D5796)	10% FBS (Sigma-Aldrich, F7524) and 1% penicillin/streptomycin (Sigma-Aldrich, P4333)
VERO	african green monkey kidney epithelia	Mata M, Nat Chem Biol 2011	Determination of virus titer	Dulbecco’s modified Eagle’s medium (DMEM; Sigma-Aldrich, D6429)	8.6% FBS (Sigma-Aldrich, F7524) and 0.9% penicillin/streptomycin (Sigma-Aldrich, P4333)
