# Supplementary material for: SPOP targets the immune transcription factor IRF1 for proteasomal degradation
Source: eLife. 2023 Aug 25;12:e89951. doi: 10.7554/eLife.89951 (PMC10491434; doi:10.7554/eLife.89951)
Supplement: Supplementary file 6. [file elife-89951-supp6.xlsx]

## Sheet: qPCR primers
Target	Primer	Sequence (5' to 3')
IRF1	FWD	AGACCCTGGCTAGAGATG
	REV	TTTCCCCTGCTTTGTATC
SPOP	FWD	ACACACAGATCAAGGTAGTG
	REV	TTTCAGTTTATCATTTGCTC
STAT1	FWD	TTCCTGACTCCACCATGTGC
	REV	CGTCCACGGAATGAGACCAT
GBP2	FWD	TGGTAACAATTCTGTAGACG
	REV	GAAAGCTCCAAGTAGTCATC
GBP3	FWD	TTCCCTGAAGCTAACGCAAG
	REV	GGGCAGATCGAAGACAAAAC
IFIT3	FWD	GGAAGAAAAGCCCAACAACC
	REV	GGCCTGCTTCAAAACATCAG
NLRC5	FWD	ATTGCTCCACCCTTGATAGC
	REV	TGAAAGCATAGCCTGTCTGC
PARP14	FWD	TACTTCCAGAGCCCGAAGAG
	REV	CCGGGTAGAAGAACACCAG
APOL2	FWD	AAACCGCCACGATAAAGACC
	REV	CTCAAGCTCCCTTTTCAACC
DTX3L	FWD	TGTTCTCCAAAGAGCAGAGG
	REV	CAATTCCATCGTGACCTTCC
