# Supplementary material for: SPOP targets the immune transcription factor IRF1 for proteasomal degradation
Source: eLife. 2023 Aug 25;12:e89951. doi: 10.7554/eLife.89951 (PMC10491434; doi:10.7554/eLife.89951)
Supplement: Supplementary file 7. [file elife-89951-supp7.xlsx]

## Sheet: NGS primers
PCR 1 (cMYC)
Primer_name	Direction	Sequence	Comments
sgDeepSeq_rev_TCGA	REV	CTCTTTCCCTACACGACGCTCTTCCGATCTNNNNNNTCGATTCCAGCATAGCTCTTAAAC	Library preparation 1st PCR
sgDeepSeq_rev_CCTA	REV	CTCTTTCCCTACACGACGCTCTTCCGATCTNNNNNNCCTATTCCAGCATAGCTCTTAAAC	Library preparation 1st PCR
sgDeepSeq_rev_GAAC	REV	CTCTTTCCCTACACGACGCTCTTCCGATCTNNNNNNGAACTTCCAGCATAGCTCTTAAAC	Library preparation 1st PCR
sgDeepSeq_rev_ATCC	REV	CTCTTTCCCTACACGACGCTCTTCCGATCTNNNNNNATCCTTCCAGCATAGCTCTTAAAC	Library preparation 1st PCR
sgDeepSeq_rev_ACTC	REV	CTCTTTCCCTACACGACGCTCTTCCGATCTNNNNNNACTCTTCCAGCATAGCTCTTAAAC	Library preparation 1st PCR
sgDeepSeq_rev_CTTC	REV	CTCTTTCCCTACACGACGCTCTTCCGATCTNNNNNNCTTCTTCCAGCATAGCTCTTAAAC	Library preparation 1st PCR
sgDeepSeq_rev_CAAG	REV	CTCTTTCCCTACACGACGCTCTTCCGATCTNNNNNNCAAGTTCCAGCATAGCTCTTAAAC	Library preparation 1st PCR
sgDeepSeq_rev_TGAG	REV	CTCTTTCCCTACACGACGCTCTTCCGATCTNNNNNNTGAGTTCCAGCATAGCTCTTAAAC	Library preparation 1st PCR
sgDeepSeq_rev_TAGG	REV	CTCTTTCCCTACACGACGCTCTTCCGATCTNNNNNNTAGGTTCCAGCATAGCTCTTAAAC	Library preparation 1st PCR
Fwd1_hybrid_P7_Nras	FWD	GCATACGAGATAGCTAGCCACC	Library preparation 1st PCR
PCR 1 (IRF1)
Primer_name	Direction	Sequence	Comments
sgDeepSeq_rev_TTCG	REV	CTCTTTCCCTACACGACGCTCTTCCGATCTNNNNNNTTCGTTCCAGCATAGCTCTTAAAC	Library preparation 1st PCR
sgDeepSeq_rev_TAGG	REV	CTCTTTCCCTACACGACGCTCTTCCGATCTNNNNNNTAGGTTCCAGCATAGCTCTTAAAC	Library preparation 1st PCR
sgDeepSeq_rev_TCTG	REV	CTCTTTCCCTACACGACGCTCTTCCGATCTNNNNNNTCTGTTCCAGCATAGCTCTTAAAC	Library preparation 1st PCR
sgDeepSeq_rev_GTTG	REV	CTCTTTCCCTACACGACGCTCTTCCGATCTNNNNNNGTTGTTCCAGCATAGCTCTTAAAC	Library preparation 1st PCR
sgDeepSeq_rev_GGAT	REV	CTCTTTCCCTACACGACGCTCTTCCGATCTNNNNNNGGATTTCCAGCATAGCTCTTAAAC	Library preparation 1st PCR
sgDeepSeq_rev_TCCT	REV	CTCTTTCCCTACACGACGCTCTTCCGATCTNNNNNNTCCTTTCCAGCATAGCTCTTAAAC	Library preparation 1st PCR
sgDeepSeq_rev_AGCT	REV	CTCTTTCCCTACACGACGCTCTTCCGATCTNNNNNNAGCTTTCCAGCATAGCTCTTAAAC	Library preparation 1st PCR
sgDeepSeq_rev_GTCT	REV	CTCTTTCCCTACACGACGCTCTTCCGATCTNNNNNNGTCTTTCCAGCATAGCTCTTAAAC	Library preparation 1st PCR
sgDeepSeq_rev_GAGT	REV	CTCTTTCCCTACACGACGCTCTTCCGATCTNNNNNNGAGTTTCCAGCATAGCTCTTAAAC	Library preparation 1st PCR
Fwd1_hybrid_P7_Nras	FWD	GCATACGAGATAGCTAGCCACC	Library preparation 1st PCR
PCR 2
Primer_name	Direction	Sequence	Comments
Rev2_p5_sgDeepSeq	REV	AATGATACGGCGACCACCGAGATCTACACTCTTTCCCTACACGACGCT	Library preparation 2nd PCR
Fwd2_p7_sgDeepSeq	FWD	CAAGCAGAAGACGGCATACGAGATAGCTAGCCACC	Library preparation 2nd PCR
For library prep primers:
In primer sequences, NNNNNN denotes random nucleotides.
