# Supplementary material for: SPOP targets the immune transcription factor IRF1 for proteasomal degradation
Source: eLife. 2023 Aug 25;12:e89951. doi: 10.7554/eLife.89951 (PMC10491434; doi:10.7554/eLife.89951)
Supplement: Supplementary file 8. [file elife-89951-supp8.xlsx]

## Sheet: Table1. mCherry-IRF1 and mCherr
	IRF1 genetic screen																MYC genetic screen
Gene ID	Day3 mCherry high		Day6 mCherry high		Day3 mCherry low		Day6 mCherry low		Day3 BFP high		Day6 BFP high		Day3 BFP low		Day6 BFP low		Day3 mCherry high		Day6 mCherry high		Day3 mCherry low		Day6 mCherry low		Day3 BFP high		Day6 BFP high		Day3 BFP low		Day6 BFP low
	irf1_d3_mcherry_high_p-value	irf1_d3_mcherry_high_lfc	irf1_d6_mcherry_high_p-value	irf1_d6_mcherry_high_lfc	irf1_d3_mcherry_low_p-value	irf1_d3_mcherry_low_lfc	irf1_d6_mcherry_low_p-value	irf1_d6_mcherry_low_lfc	irf1_d3_bfp_high_p-value	irf1_d3_bfp_high_lfc	irf1_d6_bfp_high_p-value	irf1_d6_bfp_high_lfc	irf1_d3_bfp_low_p-value	irf1_d3_bfp_low_lfc	irf1_d6_bfp_low_p-value	irf1_d6_bfp_low_lfc	myc_d3_mcherry_high_p-value	myc_d3_mcherry_high_lfc	myc_d6_mcherry_high_p-value	myc_d6_mcherry_high_lfc	myc_d3_mcherry_low_p-value	myc_d3_mcherry_low_lfc	myc_d6_mcherry_low_p-value	myc_d6_mcherry_low_lfc	myc_d3_bfp_high_p-value	myc_d3_bfp_high_lfc	myc_d6_bfp_high_p-value	myc_d6_bfp_high_lfc	myc_d3_bfp_low_p-value	myc_d3_bfp_low_lfc	myc_d6_bfp_low_p-value	myc_d6_bfp_low_lfc
37135	0.0063449	24886	0.99149	-12618	0.33752	0.99813	0.23491	0.05106	0.66523	0.3224	0.99622	-0.82261	0.23165	15423	0.72964	0.075892	0.47217	0.36548	0.41195	18832	0.19089	0.94228			0.30491	0.070444	0.86359	-20367	0.27871	0.91466	0.44561	-0.39388
37500	0.27483	11183	0.44381	0.59134	0.36795	0.39547	0.12394	0.81968	0.90535	-0.48611	0.92065	-0.32409	0.21428	14534	0.071548	13356	0.26621	0.88813	0.85578	-0.28287	0.12251	0.54178	0.62396	-0.47802	0.60231	0.53496	0.28387	0.017412	0.50316	-0.27693	0.75866	-1263
37865	0.27809	10814	0.9798	-0.32962	0.17132	0.74142	0.00012267	20466	0.1686	14077	0.7519	-0.50732	0.81361	-0.51285	0.01613	12723	0.71138	0.10185	0.50051	0.28629	0.0093192	-0.98763	0.6204	-0.10457	0.52905	-0.025217	0.18808	11739	0.76068	-0.14966	0.30557	-0.021082
38231	0.82603	0.13785	0.41243	0.078776	0.70592	-0.33873	0.56447	-0.053895	0.6491	0.30066	0.90111	-0.12184	0.26212	0.77526	0.76131	-0.62767	0.94125	-0.61607	0.15858	33399	0.60461	-0.55182			0.94387	-11891	0.39053	0.63183	0.71187	-0.24682	0.6421	-0.44905
38596	0.14516	18176	0.95024	-0.00082175	0.17912	0.67475	0.00276	26115	0.33603	12592	0.11423	10052	0.098419	22153	0.35741	0.94233	0.11368	12601	0.12371	30015	0.45151	0.40643	0.40033	0.95145	0.40979	-0.61495	0.92045	-10296	0.66261	0.33748	0.59299	-0.33644
38961	0.77707	0.35867	0.1011	12007	0.28525	0.92419	0.28872	0.86079	0.53246	0.34691	0.49887	10465			0.74262	0.11751	0.21283	0.74422	0.068311	42293	0.59775	-10696	0.19002	24305			0.72896	-1123	0.7103	0.60921	0.6231	-0.18131
39326			0.16117	11914									0.54312	0.35588	0.3772	0.95264	0.57788	-0.42566			0.37587	0.69143			0.93087	-2588	0.79342	-16504	0.2491	0.51055	0.52626	0.87847
39692	0.26041	10563	0.60642	-0.38048	0.037691	16084	0.75428	0.055958	0.39106	-0.45846	0.21411	-0.18875	0.3046	0.1201	0.7662	0.41654	0.34923	0.087506	0.98865	-35028	0.30294	0.46188	0.6438	0.84685	0.56559	0.34299	0.04684	16114	0.020134	22447	0.40613	0.069842
40422	0.79985	-0.50737	0.48251	0.17789	0.41263	0.7336	0.91055	0.009338	0.61304	0.14492	0.86472	-0.54691	0.77714	-0.45442	0.39745	-0.30673	0.48706	-0.12682			0.67348	-0.14229	0.21855	23506	0.46213	-0.29219	0.5854	-0.355	0.54938	0.30062	0.16155	17804
40787	0.057263	0.32889	0.90232	0.42812	0.62151	0.13558	0.43219	0.33918	0.44311	0.34242	0.43716	0.81664	0.51489	0.6107	0.52818	0.48635	0.52821	0.040629	0.73814	0.68413	0.15481	1046	0.52943	0.26686	0.19396	14387	0.92794	-0.7922	0.18081	13126	0.66406	0.53842
41153	0.52498	0.27838	0.65535	0.24042	0.66805	0.98874	0.67077	-0.1486	0.042117	2808	0.045146	19601	0.27972	1505	0.034133	16365	0.61637	-0.62639	0.078686	20662	0.88645	-27938	0.48406	-0.25686	0.91601	-23972	0.54458	-0.98857	0.19181	16401	0.86611	-0.82644
41883	0.6395	0.25732	0.59278	0.22603	0.012994	28792	0.30143	0.71618	0.2315	0.21536	0.14774	12524	0.69224	-0.13619	0.7507	-0.02563	0.97054	-20012			0.50068	0.3198	0.52084	0.64496	0.52015	-10465	0.070854	11913	0.56916	0.47134	0.24027	0.45659
42248	0.31841	0.93285	0.40584	0.2805	0.78548	-0.065214	0.4595	-0.065146	0.16754	16757	0.20107	11778	0.88294	0.037464	0.032756	10308	0.46584	0.16434	0.27307	25703	0.47402	-19924	0.35354	0.15683	0.04112	20936	0.5321	0.41082	0.73139	-0.66797	0.294	13547
A1BG	0.77281	-0.25574	0.65819	0.41542	0.051133	21361	0.29336	0.70089	0.64839	0.58601	0.28461	0.44191	0.29973	0.49865	0.015678	22509	0.67901	-0.43424	0.077757	41847	0.55428	0.019052			0.59186	-10183	0.0040617	28596	0.047317	0.19507	0.98476	-28075
A1CF	0.8459	0.30173	0.91017	0.07742	0.077808	11855	0.93318	-0.70135	0.85533	-0.29297	0.17097	-0.12048	0.55931	0.2877	0.99737	-11153	0.74252	0.0047549	0.75737	0.31916	0.69621	-0.50573	0.97711	-27798	0.35379	-0.032203	0.6307	-0.24868	0.010874	31459	0.37827	11161
A2M	0.79198	0.054071	0.72669	0.086102	0.22019	0.65521	0.78908	0.2459	0.83006	0.69811	0.94179	-0.091609	0.13233	16048	0.64562	0.16663	0.0062961	14221			0.56663	-0.5363	0.67875	-0.83074	0.81891	-0.57433	0.82628	-10643	0.43269	0.70074	0.022575	23087
A2ML1	0.29694	0.59806	0.48075	0.07163	0.84747	-0.057655	0.15508	1231	0.37027	0.82767	0.37111	0.88091	0.65828	-0.040649	0.031301	22457	0.86711	0.071383	0.04813	44886	0.29929	0.92677	0.17041	24206	0.83259	-0.33331	0.13061	14255	0.0089117	-0.18299	0.38378	-0.0018144
A3GALT2	0.47627	0.4173	0.36689	0.067923	0.9042	-0.56732	0.17864	0.24822	0.15921	15129	0.092337	12956	0.14514	18012	0.33206	0.26979	0.53997	-10361	0.12769	36559	0.057696	13707	0.44589	11523	0.043755	12411	0.2134	0.61017	0.52956	0.44897	0.49059	0.32599
A4GALT	0.25322	12731	0.61168	0.27551	0.0005098	16513	0.444	17475	0.16779	0.47669	0.91445	-0.14166	0.46511	0.68095	0.17252	12916	0.62091	-0.96961	0.57259	0.74012	0.25458	0.83293			0.84703	-0.3669	0.10308	0.84694	0.24291	1176	0.82538	-0.41568
A4GNT	0.60121	0.43757	0.84392	-0.51057	0.91383	-0.18284	0.959	-0.89805	0.22301	0.82207	0.56976	0.72787	0.7815	0.54263	0.99279	-10408	0.72089	0.030686	0.88116	-12511	0.48708	-0.15737	0.15015	18731	0.68912	-17479	0.46237	0.37309	0.63203	-0.6808	0.14444	0.49394
AAAS	0.76815	-0.41943	0.10488	10679	0.65064	0.73768	0.96011	-0.44039	0.50053	-0.23206	0.45092	0.74854	0.83054	-0.062603	0.94389	-0.33891	0.47421	0.56819	0.64286	0.27958	0.63103	0.3166	0.79132	-15944	0.66153	-0.92178	0.69212	-0.98259	0.54804	0.29026	0.4523	0.42567
AACS	0.42101	-0.16454	0.24204	0.81511	0.65709	-0.16374	0.45318	-0.43719	0.4883	0.63522	0.15889	13243	0.87576	-0.83871	0.72135	-0.058035	0.34267	-0.60024	0.050455	40935	0.32929	-0.52078	0.97133	-3282	0.21714	-0.62321	0.0032648	24522	0.79967	-0.39103	0.58058	-0.80012
AADAC	0.059473	13045	0.099661	0.96268	0.84075	0.072139	0.63281	0.053123	0.93713	-0.89106	0.6633	-0.24887	0.59554	0.13851	0.38584	10107	0.2981	0.77062	0.69924	-0.13088	0.65081	-14926	0.86013	-21244	0.12445	21189	0.85869	-11633	0.15974	10656	0.40317	10476
AADACL2	0.93393	-0.22014	0.3129	0.79054	0.59944	0.35496	0.16124	0.72501	0.65115	0.0090137	0.66004	0.085683	0.73172	-0.045303	0.65248	0.2709	0.9879	-15138			0.88498	-0.16859	0.94619	-2926	0.033929	28349	0.86157	-0.69172	0.54705	-14806	0.36456	0.89354
AADACL3	0.2379	11448	0.44566	0.65339	0.20733	14288	0.29707	0.77028	0.67071	-0.23488	0.029375	18738			0.66684	-0.1916	0.16964	-10015			0.15803	10034	0.8452	0.14612	0.28405	10422	0.056328	1427	0.44957	0.5002	0.461	0.41466
AADACL4	0.13757	17216	0.50017	-0.23831	0.21995	13421	0.48907	-0.17804	0.36886	0.92571	0.96134	0.16099	0.38021	0.94426	0.011267	14846	0.39167	0.70751	0.26389	22254	0.077104	19857			0.24828	0.71718	0.68475	0.20852	0.13536	0.13517	0.12123	11061
AADAT	0.86289	-0.65321	0.77006	-0.18173	0.07802	2084	0.77117	0.0034798	0.52755	-0.13574	0.18773	13681	0.60252	0.11209	0.047689	20451	0.37648	-0.76706			0.74059	-13558	0.95846	-30801	0.37668	0.47762	0.37359	0.7656	0.92596	-13735	0.33697	10658
AAED1	0.69982	0.082689	0.64646	-0.064808	0.88963	-0.45894	0.91505	-0.21583	0.77814	-0.0013051	0.10013	0.24667	0.95449	-0.30774	0.69647	0.30332	0.080076	0.9969			0.70242	-0.63963	0.55469	0.48765	0.1491	14573	0.59795	0.45941	0.90999	-22274	0.26326	14942
AAGAB	0.31135	10031	0.19973	0.64206	0.57248	0.11031	0.67417	-0.31886			0.29586	0.97292	0.26899	11364	0.83777	-0.7897	0.54161	0.52774	0.062478	44724	0.10808	18719			0.097201	0.91896	0.1726	1754			0.035368	19107
AAK1	0.93868	-12978	0.63738	-0.136	0.79264	0.36355	0.36363	0.40424					0.12578	0.68156	0.87239	-0.21843	0.38147	0.60137			0.40358	0.28338	0.15563	17012	0.1637	16827	0.24662	0.4063	0.47226	0.1244	0.39945	10163
AAMDC	0.091159	15404	0.94912	-0.17949	0.62788	-0.061462	0.84444	-0.19412	0.99351	-0.77421	0.3912	0.63719	0.14574	10284	0.18288	0.99549	0.67206	-0.88062			0.68137	-15597	0.14149	28687	0.70259	0.41514	0.88437	-0.71938	0.11638	-13715	0.81663	-10606
AAMP	0.5631	-0.33934			0.44493	0.90384	0.17378	0.9428	0.55236	0.45019	0.9672	-14619	0.76233	0.51568	0.50875	0.44291	0.69223	-0.39082			0.32319	0.51301			0.82236	-16834	0.44125	-0.6157			0.055693	14648
AANAT	0.36894	0.65481	0.24343	0.2408	0.56475	-0.34987	0.70672	0.11788	0.98227	-13119	0.97664	-15902	0.46712	0.64932	0.61334	-0.069122	0.076376	0.0097034			0.59019	-10998	0.11864	2559	0.10391	19769	0.95484	-16761			0.18829	20405
AAR2	0.24726	0.63804	0.18868	0.68279	0.66337	-0.10629	0.098947	0.95773	0.37327	-0.05546	0.72367	-0.010691	0.36776	10322	0.47427	0.44291	0.26153	0.43358			0.77751	-0.58593	0.19503	25022	0.96766	-16443	0.23125	-0.063662	0.40043	0.83287	0.51717	0.072554
AARD	0.086318	14101	0.64971	0.20938			0.0048099	0.68675	0.0013684	31114	0.92184	-0.39877	0.34278	0.58304	0.52165	0.19926	0.96974	-0.66578	0.9498	-10501	0.90862	-13326			0.55881	-0.66674	0.63846	-0.22883	0.81276	0.17792	0.96813	-15368
AARS	0.14828	12566			0.92445	0.17703	0.24431	0.64337	0.29228	11205	0.76443	-0.10607	0.23069	14222	0.0044396	18606	0.28555	0.11517			0.88988	-14418	0.067931	30682	0.87676	-14744			0.084771	18772	0.81361	-16813
AARS2	0.99669	-1497	0.72959	0.095448	0.9273	-11342	0.058426	13291	0.96307	-11922	0.27171	11264	0.98058	-16954	0.42523	-10764	0.038452	21652			0.97332	-19691	0.94861	-16389	0.014045	26969	0.095922	15496	0.31664	-0.69161	0.70575	-0.47767
AARSD1	0.030444	1875	0.11427	-0.33999	0.064305	10189	0.54186	0.014052	0.13467	15187	0.94462	-0.82654	0.94811	-0.021654	0.39722	0.26245	0.63491	0.13338	0.09521	39241	0.021978	21339			0.093663	0.92867	0.70482	-0.24665	0.25006	0.88127	0.52289	0.15945
AASDH	0.076064	0.24257	0.12313	0.29504	0.050124	16176	0.71029	0.16982	0.21085	10346	0.48525	0.21235	0.3685	0.78305	0.45801	-0.03295	0.33503	0.55041	0.38597	18769	0.42707	-16552	0.66407	-0.74961	0.47256	0.61555	0.54926	0.29576	0.63525	-0.8548	0.44582	0.97167
AASDHPPT	0.49467	0.063473	0.42166	0.53282	0.3707	0.02562	0.64414	0.34082	0.072539	22458	0.49163	0.76846	0.55441	0.7648	0.62355	0.58825	0.76615	-0.28886	0.63965	-0.073028	0.72849	-0.12996			0.29964	-0.11327	0.70743	0.61609	0.381	0.85175	0.15194	0.81868
AASS	0.01365	22548	0.22791	0.94173	0.097325	10486	0.37552	0.16796	0.24647	0.64823	0.33528	0.89163	0.85896	-0.34946	0.17436	0.6473	0.7367	-0.038863	0.51458	0.28167	0.029784	22709	0.79351	-16087	0.86607	-10748	0.011604	0.60874	0.046565	11203	0.025473	29018
AATF	0.64348	0.67514			0.64636	0.21545	0.37101	0.66084	0.091525	0.83579	0.61952	0.81671	0.57734	0.044718	0.69008	0.59444	0.20967	0.70116	0.88952	-18279	0.58554	0.2582			0.94673	-28243	0.69271	0.53167	0.48867	-0.19871	0.71638	-0.74043
AATK	0.45068	0.49129	0.66825	-0.22736	0.74406	-0.068712	0.34615	0.10784	0.45216	-0.75502	0.89135	-0.0064456	0.23566	0.93693	0.68291	0.39957	0.88006	-13299	0.40133	17262	0.25638	10282	0.66211	-0.24096	0.72517	-0.97299	0.047039	0.747	0.28277	0.93794	0.63681	-24242
ABAT	0.45332	0.73762	0.32581	-0.2798	0.64004	0.31833	0.54595	-0.2047	0.21422	14874	0.25017	0.74062	0.11837	16626	0.22999	0.29904	0.40683	0.32414	0.3769	19846	0.51356	0.18867	0.26413	18392	0.97126	-13214	0.39626	0.68625	0.71155	-19338	0.081059	25736
ABCA1	0.28528	0.58105	0.90689	-0.10084	0.86094	0.24223	0.5359	0.24615	0.06281	-0.073645	0.56271	0.70501	0.19426	0.93966	0.25771	0.74083	0.60401	0.34463	0.20521	24637	0.8479	-0.45866	0.68676	-0.90075	0.75037	-0.63238	0.90859	-0.75041	0.94424	-0.45167	0.7677	-0.70007
ABCA10	0.95068	-0.30489	0.63358	0.19729	0.5249	0.60058	0.39531	0.37593	0.8408	-0.76057	0.898	-0.23679	0.17425	14828	0.3105	-0.020439	0.64596	0.11197			0.075526	11544			0.39463	0.7032	0.23065	12168	0.099818	24624	0.17407	20684
ABCA12			0.61086	0.40752			0.40873	0.53993	0.61667	0.73734	0.60926	0.42938	0.68032	0.80203	0.31989	-0.36093	0.8984	-0.22291	0.17452	30852	0.38554	0.24887	0.326	16173	0.34553	0.86198	0.36898	0.068569	0.32345	11232	0.56764	0.80161
ABCA13	0.65808	0.1824	0.94645	-0.25555	0.56444	0.42305	0.98555	-0.43089	0.87191	0.48963	0.66658	-0.20317	0.67764	-0.74456	0.54292	0.39834	0.54221	0.15895	0.60172	14809	0.23802	0.89466	0.32918	0.88846	0.25196	0.86838	0.59112	0.36964	0.93779	-12836	0.62213	-0.38486
ABCA2	0.86415	0.23695	0.79445	-0.43095	0.2022	0.1554	0.85045	-0.51627	0.2035	14635	0.4512	10554	0.56739	0.65915	0.87298	-0.020057	0.15061	0.97006	0.41328	16489	0.25277	-0.44846	0.48845	0.92622	0.91023	-15521	0.70694	-0.54573	0.92543	-25824	0.73883	-12088
ABCA3	0.25626	11579	0.56044	-0.24866	0.49512	0.67134	0.85054	0.19512	0.88824	0.18305	0.40173	0.6669	0.11945	14359	0.73024	-0.23214	0.3488	0.081352	0.072429	41158	0.19752	0.40031	0.79044	-1033	0.61743	-0.36123	0.2574	0.87714	0.018959	20402	0.12563	1506
ABCA4	0.84718	0.095385	0.15363	0.87714	0.091619	17712	0.35686	-0.35897	0.69547	0.8674	0.084908	10453	0.64801	-0.69127	0.21924	0.52176	0.57143	-0.39	0.26397	29193	0.38909	0.63394	0.75795	-13663	0.27891	-0.065052	0.42248	0.75261	0.50352	-0.57809	0.89354	-15607
ABCA5	0.19452	14747	0.30292	0.29075	0.28784	0.49493	0.73674	0.37799	0.29629	12507	0.20322	0.78849	0.48712	10557	0.16021	0.91298	0.88626	-13549	0.81491	-0.23878	0.097426	10019	0.053116	42502	0.38688	-12187	0.90012	-14099	0.59765	-0.019267	0.92681	-0.9335
ABCA6	0.49376	0.59438	0.15075	0.97436	0.22812	0.9682	0.13797	0.61127	0.18165	14439	0.34987	0.52628	0.86008	-0.75876	0.92976	-0.0065293	0.42542	0.44457	0.87341	-16553	0.94655	-14682	0.058496	3482	0.16016	-0.42072	0.89776	-0.094399	0.99351	-16457	0.42951	-10781
ABCA7	0.27874	0.75628	0.1707	-0.12164	0.90137	-0.95765	0.99164	-12788			0.16106	14462	0.83869	0.4863	0.25534	-0.11571	0.27229	0.28959			0.16715	0.99312	0.011561	45945	0.89383	-0.37648	0.43588	0.68895	0.53343	-0.41641	0.57184	-0.23619
ABCA8	0.57263	0.25939	0.21607	0.94056	0.2919	10063	0.44716	0.34286	0.70199	0.81333	0.92122	-0.31585	0.60876	-0.65603	0.95763	-0.28922	0.27774	-10651	0.022795	48329	0.19855	-0.22627	0.0096013	38153	0.39035	-17248	0.049069	16702	0.71499	-12263	0.40802	-0.048686
ABCA9	0.6601	-0.21962	0.75936	-0.43997	0.66997	-0.028144	0.40568	0.42057	0.68642	-0.2576	0.1513	11831	0.61737	0.2283	0.90974	-11057	0.61839	-0.12612	0.25505	21969	0.14677	13997	0.68813	0.0021408	0.27979	11497	0.61652	-0.32111	0.31275	11148	0.93609	-26836
ABCB1	0.91778	-0.37264	0.81191	-0.045693	0.25792	0.95969	0.20722	-0.29947	0.63839	0.23683	0.063526	-0.090731	0.64275	-0.062063	0.99943	-13398	0.39436	0.61285	0.26282	25442	0.43212	0.50263	0.4216	0.78333	0.065085	0.62581	0.96655	-15331	0.13926	0.89359	0.41427	0.84657
ABCB10	0.44428	0.59712	0.56843	0.75316	0.66086	-0.098928	0.92901	-0.15081	0.18473	1648	0.6173	-0.47046	0.81209	0.19482	0.65126	0.26998	0.39738	0.4865	0.6871	0.18234	0.79454	-0.6377			0.741	-0.2304	0.54044	0.62833	0.20596	13773	0.064667	3122
ABCB11	0.73335	0.034886	0.41345	0.32471	0.86295	-0.76875	0.45701	0.60317	0.3987	0.18768	0.56784	0.37751	0.10472	0.3578	0.12537	11556	0.80725	-0.89894	0.13372	35332	0.17736	11111	0.37354	0.091322	0.57861	-17448	0.86614	-14483	0.96845	-31497	0.86774	-20584
ABCB4	0.6048	0.68415	0.52232	-0.021208	0.44281	0.38567	0.52244	-0.30343	0.87812	-0.32633	0.45093	-0.055258	0.35815	0.83184	0.58684	-1234	0.62145	0.16912	0.74717	-0.49943	0.74047	-0.55377	0.5002	10153	0.69275	0.45334	0.82797	-12259	0.1145	18104	0.99269	-10235
ABCB5	0.6193	0.1823	0.47668	-0.85185	0.40205	0.55984	0.38258	0.15477	0.19508	0.82479	0.023986	16786	0.74369	0.20242	0.11594	10806	0.35154	0.67038	0.2248	29431	0.037018	13146	0.68638	0.4284	0.33022	0.88755	0.89971	-0.46368	0.32348	11315	0.98845	-17989
ABCB6	0.089604	22596	0.37642	0.12082	0.3073	0.99793	0.12127	2026-01-01	0.47164	0.51294	0.65634	-0.26108	0.083647	15613	0.90237	-0.12765	0.79003	-12125	0.75828	-0.56714	0.92737	-1329			0.82222	-25022	0.72456	-0.42671	0.74422	-0.40056	0.5678	-0.74683
ABCB7	0.94085	-12891	0.86688	-0.90288	0.33009	0.44223	0.88241	0.11556	0.86931	0.23631			0.39201	12015	0.53542	0.43544	0.091602	0.63343	0.79442	-0.85842	0.42956	-0.17117			0.24906	11456	0.75026	-0.18639	0.47529	-13505	0.45601	0.87034
ABCB8	0.5476	-0.054903	0.20852	0.9878	0.64067	0.10344	0.7112	-0.55854	0.9145	0.030314	0.052375	1578	0.67188	-0.0087176	0.96927	-0.31053	0.19494	0.25096			0.4957	-10555	0.74711	-12841	0.52831	0.43169	0.70957	0.058766	0.44237	0.75033	0.21929	10309
ABCB9	0.3245	10672	0.02473	14315	0.86579	-0.10533	0.079386	13547	0.51905	0.18908	0.12574	12801	0.20001	12363	0.30016	-0.30485	0.29104	0.070714	0.263	1827	0.83421	-0.75777	0.78734	-0.38724	0.95364	-13347	0.88031	-1.1	0.49407	0.17356	0.74944	-12503
ABCC1	0.8456	-0.34497	0.01099	0.93889	0.60543	0.42147	0.4279	-0.12626	0.56972	0.365	0.77496	-0.57408	0.88231	-0.65687	0.87472	-0.50157	0.95289	-13318	0.3317	20165	0.70566	0.056314			0.58991	0.30928	0.52014	-15237	0.77715	-0.11329	0.97163	-0.79326
ABCC10	0.13184	13396	0.11176	0.18887	0.45056	0.80422	0.30578	0.75982	0.56571	0.26859	0.88271	-0.90727	0.68061	-0.14253	0.014574	13024	0.060771	-0.4112	0.013845	50818	0.2954	0.9655	0.5638	0.55461	0.54837	-0.14953	0.2047	12682	0.29974	10261	0.77398	-10009
ABCC11	0.51054	0.27475	0.67317	0.49868	0.79615	-0.30971	0.033983	11226	0.27194	11182	0.35855	0.54484	0.0094543	24806	0.50164	0.72838	0.97054	-12709	0.59506	0.61463	0.41392	0.1593	0.20052	18592	0.88338	-23578	0.74083	-1303	0.4685	0.39554	0.76362	-0.19153
ABCC12	0.89101	-0.71633	0.64887	0.34035	0.68216	0.72452	0.99509	-12593	0.39527	0.90884	0.43361	0.63539	0.070377	10391	0.74468	-0.065591	0.70454	-0.24427	0.82615	-0.10086	0.33132	-1042	0.5641	0.3897	0.55324	0.4508	0.87584	-14771	0.74851	0.49553	0.8433	-0.31045
ABCC2	0.29776	0.67636	0.099809	1353	0.529	0.23228	0.4207	0.41058	0.093206	16937	0.62193	0.1203	0.43308	0.18969	0.78157	-0.26607	0.67646	-0.38765	0.32599	0.87859	0.34619	-0.38244	0.96357	-31537	0.13475	-0.52583	0.62868	-0.26927	0.52222	-11428	0.43327	-0.7004
ABCC3	0.18888	0.13771			0.70019	-0.7512	0.45433	-0.78493			0.9994	-1423	0.5351	0.25576	0.30523	-0.55685	0.6141	0.16828	0.19388	31332	0.73098	-0.67662	0.50142	0.27774	0.56785	-0.30003	0.45439	0.78693	0.6538	-0.8359	0.54864	-0.12
ABCC4	0.87585	-0.62728	0.32428	0.15784	0.53526	0.63668	0.68516	0.016035	0.1163	13922	0.18171	12523	0.12843	2005	0.8662	-0.2828	0.62468	-0.14434			0.74773	-20821	0.24646	20093	0.36155	0.78006	0.93773	-11514	0.044907	14425	0.083642	1953
ABCC5	0.22836	13055	0.57955	0.34396	0.8041	-0.45259	0.46172	0.13636	0.54458	0.40069	0.27569	0.85044	0.5769	0.33126	0.14929	11183	0.0095997	19529	0.63676	0.29945	0.8267	-0.39217	0.73337	-0.080394	0.091652	14187	0.049046	1238	0.63668	-20085	0.58057	0.047976
ABCC6	0.86368	-0.86745	0.90782	-10746	0.23494	0.86206	0.31015	0.72014	0.65514	0.31995	0.50491	0.397	0.85063	-0.64235	0.52899	0.56545	0.70381	-15913			0.96244	-17967			0.75411	-0.31088	0.04789	11501	0.43086	-0.30155	0.15964	17591
ABCC8	0.54107	-0.24307	0.30984	0.7994	0.83446	-0.66018	0.81713	0.11551	0.048386	26928	0.65278	-0.098455	0.74947	-0.30112	0.16873	0.9259	0.85684	-1.79	0.63825	0.64411	0.058558	1598	0.44364	0.65307	0.70892	0.47281	0.54552	-0.21958	0.24103	0.72869
ABCC9	0.42536	0.60371	0.39291	0.094967	0.45962	-0.39651	0.87328	0.036137	0.63902	0.11112	0.70908	-0.22586	0.30874	10161	0.49667	-0.11139	0.051077	15902			0.0015799	15077			0.13927	18072	0.67	-0.46991	0.82817	-19337	0.027505	2663
ABCD1	0.57146	0.20404	0.73469	0.56899	0.3586	0.79139	0.0044924	14801	0.85011	-0.79684	0.5535	0.20707	0.33296	1219	0.725	-0.22154	0.067982	18174	0.79274	-0.84105	0.31236	-0.47668			0.36239	0.75837	0.45493	0.68333	0.45908	-13028	0.69185	-0.95141
ABCD2	0.18193	16148	0.29624	0.10347	0.40224	0.38688	0.89083	0.014458	0.6685	0.45681	0.84557	-0.67575	0.68537	-0.030195	0.13523	-0.13241	0.47874	-0.14993			0.38451	-0.88397			0.39388	0.70052	0.85275	-0.046431	0.9897	-11934	0.7968	-0.40088
ABCD3	0.32511	12743	0.34877	0.4146	0.39605	0.60908	0.81942	0.035095	0.20684	11193	0.33335	0.6611	0.1931	17391	0.39097	0.72126	0.3295	-0.31117	0.74771	-0.47169	0.72733	-1612	0.063203	25452	0.50141	-14691	0.42215	0.34014	0.26577	10704	0.48743	0.24808
ABCD4	0.91159	-0.26378	0.1627	0.19638	0.48768	0.4258	0.34354	0.37047	0.090085	20463	0.36234	0.52013	0.56626	0.3429	0.63203	0.63269	0.32257	0.7853	0.11507	37645	0.22651	12154			0.89559	-17284	0.32828	-0.53754	0.28357	1271	0.58047	-0.68962
ABCE1	0.3678	0.78973					0.88169	0.044527	0.28962	1126			0.36308	0.36581	0.56882	0.64133	0.33976	-0.61259			0.32282	0.51751			0.43314	0.59877			0.7956	0.52837	0.37485	0.56482
ABCF1	0.6465	-0.14901	0.40959	0.57823	0.0012778	22428	0.00276	27483	0.79546	0.15718	0.088482	21063	0.85526	0.16407	0.024423	13769	0.75058	-0.88326			0.65135	-2192	0.51345	-27629	0.61594	0.46457	0.70005	-15841	0.022057	28065	0.016479	38609
ABCF2	0.2226	14128	0.16772	0.97366	0.40488	0.8655	0.53485	-0.22088	0.046442	25452	0.90222	-0.247	0.92847	-0.42711	0.16167	0.21577	0.38057	0.39602	0.42372	20921	0.81895	-0.89265			0.80941	-0.34488	0.24028	0.060739			0.3205	11847
ABCF3	0.95933	-0.72686	0.48878	0.71999			0.35697	0.54502	0.10145	15404	0.93213	-11434	0.078132	22305	0.95633	-0.66215	0.51459	-0.94713	0.57682	0.70697	0.65009	-0.80028	0.10741	21166	0.57582	0.48852	0.55467	-0.097101	0.42903	0.55142	0.40904	0.67711
ABCG1	0.23235	10227	0.82951	-0.023539	0.60452	-0.68124	0.99981	-11994	0.63481	-0.45615	0.77054	-0.79074	0.67223	0.54529	0.7107	-11165	0.72664	-0.39797	0.54482	15857	0.40573	-0.9093	0.39449	13129	0.53582	-0.33162	0.92048	-0.41101	0.39247	0.77282	0.37845	-0.18057
ABCG2	0.18995	0.94868	0.13797	0.44706	0.97358	-12199	0.6747	0.31132	0.95755	-15043	0.53019	-0.18712	0.9699	-0.63424	0.47457	0.68069	0.66665	0.36704	0.48617	12532	0.95087	-1255	0.69676	-0.95014	0.94334	-21396	0.17161	14632	0.90243	-1196	0.816	-17175
ABCG4	0.6347	0.29523	0.84819	0.18216	0.29321	0.77628	0.65551	0.62611	0.49334	0.31243	0.71523	0.46022	0.35394	0.67632	0.30449	0.78257	0.12573	-10882	0.070572	39853	0.5976	-16869	0.46412	13676	0.16862	14857	0.24812	-0.1689	0.33136	0.28097	0.046366	28167
ABCG5	0.22911	11634	0.28577	0.7175	0.82397	-0.10761	0.93527	-0.28459	0.47773	0.96956	0.55493	0.7528	0.59273	0.97181	0.86741	0.44333	0.93692	-0.51445	0.3961	20478	0.70936	0.1171	0.31858	14752	0.6922	0.080868	0.6981	-0.3192	0.66386	0.12275	0.80299	-0.85856
ABCG8	0.5393	0.27206	0.91726	-0.41152	0.16857	13666	0.012214	18481	0.28029	11506	0.60771	0.24064	0.75052	-0.39099	0.057298	17799	0.59573	-0.81428	0.29934	2379	0.85905	0.42977			0.49089	0.44895	0.20631	0.82087	0.6997	-0.21245	0.34042	11186
ABHD1	0.55282	0.5901	0.025185	17751	0.91947	0.033659	0.8953	-0.20109	0.4068	0.65091	0.92207	-0.32586	0.28866	10051	0.31839	0.7068	0.68855	-14097			0.99934	-31724			0.43329	0.56891	0.3607	-0.0080223	0.5733	-0.026065	0.77854	-0.93887
ABHD10	0.6681	0.84862	0.74857	0.058414			0.14711	0.080391	0.016086	27589	0.17842	13271	0.67728	0.24387	0.17307	0.26254	0.62242	-13928	0.48492	12667	0.082784	13757	0.48577	0.4083	0.77151	-0.53313	0.91749	-13885	0.5552	0.085299	0.81203	-0.84353
ABHD11	0.51616	0.29735	0.035698	22017	0.56098	0.48809	0.69237	-0.39272					0.54126	0.57993	0.29862	0.91193	0.64965	0.12447			0.078214	18198			0.10815	21046	0.90171	-2421	0.012069	22325	0.74266	-12229
ABHD12	0.76413	0.64619	0.68174	0.23397	0.038843	15236	0.14405	0.99516	0.2332	0.79668	0.11324	18493	0.38213	11845	0.1121	13338	0.78689	-0.048563			0.78721	0.15667			0.47449	-0.55049	0.26404	-0.76762	0.48969	-0.75434
ABHD12B	0.98004	-10696	0.96129	-10089	0.24385	0.42074	0.37168	-0.71992	0.055296	23202	0.89285	-0.59115	0.79954	-0.35588	0.9183	-0.53715	0.63215	-0.037387	0.92456	-22526	0.3678	0.44436	0.5115	0.29364	0.086754	18148	0.80479	-0.41572	0.86248	-21173	0.38767	0.80813
ABHD13	0.95282	-0.13382	0.74741	0.43693	0.39145	10008	0.19082	0.96133	0.15684	15108	0.57673	0.61146	0.051945	13045	0.55217	0.72973	0.75514	-23368	0.07313	40899	0.76124	-0.69393	0.77985	-0.75868	0.71457	0.45749	0.32649	-18243	0.44705	-0.85161	0.35686	0.83607
ABHD14A	0.10189	14974	0.61911	-0.27074	0.90024	-0.98454	0.88279	-0.26158	0.85378	0.31677	0.79673	-0.035659	0.23985	13075	0.62601	0.58621	0.99962	-21351	0.22883	0.67239	0.33391	-0.41774	0.2309	21758	0.8277	-19171	0.80152	-11791	0.24256	13466	0.37165	0.89112
ABHD14B	0.55498	0.44416	0.78741	-0.41807	0.50484	0.35513	0.7905	-0.096705	0.89402	-0.52885	0.31746	0.98044	0.92663	-0.62785	0.5336	-0.037208	0.64893	-17405	0.15883	34729	0.63952	-0.10839	0.098785	38141	0.79521	0.14781	0.47954	0.26364	0.76771	0.091173
ABHD15	0.1971	10529	0.68229	0.22575	0.71845	-10184	0.083411	0.90022	0.34741	0.95633	0.51357	-0.27569	0.70678	10221	0.2332	0.087344	0.65556	-11566			0.16779	14419	0.22359	16443	0.42058	-0.034669	0.096428	0.13178	0.053034	1173	0.53884	0.36443
ABHD16A	0.43597	0.3568	0.21043	1026	0.24163	12227	0.84906	-0.082669	0.23142	14747	0.3623	0.95463	0.30967	12308	0.62452	-0.039825	0.74814	0.059896	0.93516	-23883	0.29132	0.1603	0.83826	-19399	0.80452	-0.76279	0.019515	12323			0.43787	0.93161
ABHD16B	0.33752	-0.87495	0.47854	0.33605	0.39089	0.87279	0.77387	-0.97967	0.34592	-0.51295	0.2228	0.33203	0.73628	0.64637	0.92764	0.055066	0.48485	-0.0089273			0.21306	11158	0.93625	-16644	0.38392	0.71987	0.22922	11848	0.016833	35212	0.31004	13527
ABHD2	0.81531	0.022231	0.28114	0.79096	0.8694	0.30469	0.18747	0.33376	0.90725	-1141	0.1576	0.95522	0.54213	0.98391	0.52614	0.78789	0.071609	16527			0.22372	-0.96327	0.77356	-0.95661	0.36223	-0.1951	0.59025	0.53634	0.80515	-0.29451	0.17753	20661
ABHD3	0.36124	0.73289	0.34733	-0.28114	0.85657	-0.75294	0.047034	0.51936	0.73854	0.26931	0.26308	0.50835	0.58551	0.17575	0.056406	0.61389	0.5512	-0.20761	0.37671	19265	0.13412	14375			0.6321	-0.78483	0.3069	-23017	0.065688	28819	0.058987	22842
ABHD4	0.71286	0.070048	0.68969	-0.090504	0.57092	0.15773	0.85296	0.061941	0.054927	12782	0.98265	-1045	0.51931	10284	0.40544	0.72831	0.32287	0.3925	0.23326	28155	0.93328	-0.58324	0.21625	23063	0.60142	0.2751	0.47584	-0.71724	0.64974	-17238	0.3296	0.44867
ABHD5	0.833	-0.82306	0.51996	0.40593	0.043654	22054	0.70545	-0.12732	0.49779	10576	0.84713	-0.76992			0.82625	-0.18017	0.27842	-0.27726	0.59998	0.41768	0.044731	10486	0.018708	48632	0.58275	-15197	0.082865	10783	0.65503	-0.31127	0.78105	-0.19309
ABHD6	0.59752	-0.054685	0.39228	0.66642	0.30386	0.76366	0.42781	0.001959	0.65261	0.6095	0.98413	-0.97966	0.19949	17773	0.49692	0.68378	0.16166	0.99604			0.21302	13428	0.80017	-16518	0.40896	0.61799	0.59751	0.37136	0.85615	-16687	0.32481	0.34806
ABHD8	0.91199	-0.65546	0.62651	0.45414	0.11635	18057	0.69824	0.22093	0.32691	0.50342	0.22904	-0.065237	0.442	10683	0.67783	0.19491	0.60536	0.42052			0.25249	0.16248			0.54691	0.017591	0.48851	0.38757	0.67371	-0.039134	0.094457	27249
ABI1	0.5851	0.94718	0.082625	10791	0.73495	-0.27239	0.58232	-0.68349	0.94428	-13372	0.068331	15499	0.039697	27448	0.63927	-0.35525	0.20682	0.78328			0.19504	14403					0.3221	0.83923	0.92421	-17517	0.67835	-0.66299
ABI2	0.31933	-0.16484	0.25845	0.91369	0.19367	13006	0.26908	-0.10888	0.75543	-0.59424	0.41147	0.3953	0.47783	0.87667	0.89931	-0.10497	0.13924	10007			0.77269	-0.47905	0.78679	-10174	0.6916	0.19748	0.52134	-0.060359	0.70941	-11477	0.24225	16087
ABI3	0.30478	10478	0.23443	0.98133	0.48396	0.61891	0.72504	-0.19893	0.1333	18752	0.060536	13899	0.33727	0.62361	0.85982	0.3083	0.36429	0.40381	0.31416	23038	0.14643	1776	0.45278	0.58027	0.26042	0.36335	0.39567	0.14218	0.96934	-1766	0.46413	0.5846
ABI3BP	0.56158	0.84525	0.37312	0.25804	0.76555	-0.076453	0.90903	0.10135	0.44368	0.59204	0.40757	0.26808	0.055156	19353	0.92274	-0.16065	0.4636	-0.82653	0.18348	32154	0.16301	13097	0.17145	28595	0.4433	0.72052	0.088496	-0.033275	0.65711	-0.3412	0.24592	15621
ABL1	0.52868	0.90585	0.16599	0.29013	0.13218	0.84392	0.14557	0.89502	0.37923	0.70806	0.89067	-11693	0.97577	-16007	0.46037	-0.52019	0.93992	-0.81662	0.83055	-13198	0.093232	10665	0.14415	21485	0.62487	0.25292	0.50669	-0.25334	0.80151	-10015
ABL2	0.87995	-0.22591	0.98674	-0.4179	0.94312	-0.98902	0.8293	0.0080338	0.75426	-0.60793	0.49429	0.64756	0.76804	-0.26797	0.82962	-0.075548	0.58519	0.092686	0.58253	0.72052	0.81525	-15507	0.9418	-18233	0.23241	-0.35168	0.90291	-10038	0.94023	-0.63627	0.94512	-0.019087
ABLIM1	0.87898	-0.1038	0.2125	0.42217	0.63591	-0.027131	0.88967	-0.30501	0.49129	0.2862	0.31764	0.32227	0.18939	14584	0.6401	-0.45333	0.31886	0.84572	0.43963	12723	0.64648	0.035954	0.51493	0.20723	0.46637	-0.37076	0.090175	0.69794	0.21943	11764	0.88788	-22544
ABLIM2	0.78742	-0.54293	0.51333	0.44738	0.61709	0.47283	0.49259	0.055161	0.10794	18527	0.065081	16277	0.098082	19767	0.17585	12281	0.57986	-16161	0.5006	-0.19548	0.55677	0.39623	0.77588	-0.96505	0.23771	-0.85459	0.53452	-0.1877	0.43816	0.69471	0.42145	10219
ABLIM3	0.44553	10657	0.090985	0.94827	0.39383	0.015716	0.63312	0.25693	0.12657	16392	0.71965	0.5517	0.99503	-0.65031	0.91423	0.076068	0.052623	15623	0.061295	36632	0.073535	11503	0.82041	-1163	0.54129	-0.30803	0.60087	-0.15209	0.72437	-0.82818	0.27604	-0.86389
ABO	0.6479	-0.007052	0.52824	-0.82126	0.85702	-18357	0.86281	-0.19338	0.74872	-0.55035	0.95091	-0.22532	0.082543	15061	0.40582	0.11507	0.43891	-0.35475	0.47985	13533	0.40138	0.52304			0.41573	0.69147	0.87062	-0.51614	0.87476	-0.38795	0.8272	-12413
ABR			0.30399	0.85951	0.19721	0.021081	0.37513	0.46165	0.84161	0.37119	0.97398	-0.58672			0.87406	0.2253	0.64337	-0.13944	0.27837	24736	0.8074	-0.72035			0.066104	18469	0.70775	-0.41758	0.69668	-10476	0.6873	-0.88311
ABRA	0.72839	0.20153	0.43177	0.48585	0.11143	0.23637	0.95647	-0.91007	0.38312	0.29184	0.17143	14353	0.71964	-0.21091	0.59991	0.30026	0.078553	19213			0.16359	15329	0.88535	0.20732	0.96481	-15831	0.29131	-0.5231	0.12242	18846	0.95746	-1906
ABRACL			0.35231	0.084804	0.63652	0.41842	0.58101	0.28604	0.91407	-11573	0.39084	0.76826	0.40893	0.49166	0.072611	18041	0.39118	-13963			0.86287	-19403	0.62405	-0.043139	0.70344	-20783	0.2551	0.12976	0.67473	-0.23886	0.52779	0.22145
ABT1	0.16348	16323	0.96665	-1488	0.16704	15852	0.23536	0.90412	0.84467	-0.81716			0.41662	-0.067949	0.13854	0.6776	0.92679	-1392	0.62689	1217	0.30995	0.14672			0.97837	-15344	0.84287	-0.51454	0.13665	13515	0.76454	-0.32414
ABTB1	0.81513	0.02788			0.38806	0.5666	0.33045	0.63625	0.1017	10598	0.012766	21763	0.54528	0.33361	0.45222	0.45309	0.073985	15118			0.60816	-0.2924	0.004274	59065	0.18675	12638	0.27282	0.65961	0.77647	-0.78845	0.066216	20094
ABTB2	0.13292	14576	0.73433	-0.029692	0.62648	-0.17601	0.78122	-0.63873	0.43077	11253	0.37252	11139	0.55332	0.61352	0.44554	0.45773	0.85997	-0.66148	0.10238	33234	0.038094	17261	0.02243	39483	0.10524	0.86773	0.98515	-19872	0.33396	0.85134	0.78246	-0.1849
ACAA1	0.69645	-0.26014	0.00080044	20081	0.73791	0.18728	0.34068	0.38145	0.19211	11182	0.75513	0.11579	0.0029138	27615	0.26557	11606	0.20446	0.053382	0.96514	-2878	0.55092	-12488			0.40286	-0.37018	0.46966	-0.8342	0.69914	-11126	0.75611	-13029
ACAA2	0.18892	0.37266	0.98696	-10601	0.57128	0.13691	0.76204	-0.48508	0.67909	-1103	0.4437	0.71049	0.88691	-0.21713	0.67229	0.45249	0.035682	11407			0.086895	15683	0.02366	48921	0.28898	0.82911	0.33794	0.19333	0.66716	0.51757	0.27329	-0.49578
ACACA	0.2866	0.8119	0.50392	0.14802	0.96834	-0.77481	0.87926	-0.69943	0.99004	-0.4367	0.98845	-0.69197	0.65894	-0.35416	0.83049	0.16971	0.68151	-0.3469	0.85527	-14725	0.69068	-19928	0.26733	10861	0.5797	-0.020552	0.96084	-0.58965	0.57254	-0.48894	0.36194	0.48795
ACACB	0.62823	-0.36107	0.28561	0.7062	0.94094	-0.60015	0.6438	-0.34194	0.41955	0.56655	0.5983	0.49113	0.9804	-0.025418	0.34774	-0.20372	0.65804	-0.19728	0.88842	0.76067	0.96215	-0.59401	0.54898	-14955	0.36885	0.548	0.27311	0.93112	0.92351	-22634	0.68381	-0.050832
ACAD10	0.22188	12708	0.015079	0.17412	0.79044	-0.083737	0.89078	-0.36713	0.78859	-0.62171	0.56862	0.51904	0.21319	13991	0.18061	0.23746	0.23695	0.60518			0.86227	-0.64172	0.75851	-13668	0.59284	-0.27596	0.070001	1607			0.50071	0.17543
ACAD11	0.7022	-0.29792	0.10509	10539	0.012439	18494	0.70822	0.37688	0.96205	-0.067086	0.24917	11856	0.82758	-0.18276	0.23665	0.89369	0.70327	-0.12478	0.22852	28067	0.77319	-1678	0.97949	-24633	0.58473	-12627	0.19259	0.33935	0.81937	-18489	0.8634	-20947
ACAD8	0.46252	0.68486	0.85286	-0.62737	0.34737	-0.16513	0.96986	-0.78284	0.25149	0.80692	0.98498	-10288	0.34407	0.40779	0.18591	12358	0.74044	-0.46311			0.29713	0.87862	0.15076	29515	0.19101	0.3268	0.64835	-0.78183	0.74807	-14626	0.38306	0.80492
ACAD9	0.93774	-0.43106	0.30529	0.090964	0.9975	-0.88422	0.34003	0.047988	0.8066	-0.024459	0.084017	13485	0.66171	-0.17365	0.97982	0.082583	0.75016	-10514			0.80232	-0.83819	0.12552	13306	0.092965	-0.052632	0.93633	-16815	0.50574	-0.023982	0.54142	-0.088614
ACADL	0.45511	0.28021	0.21354	0.36146	0.43941	-0.76522	0.74602	-0.18626	0.21489	15007	0.37156	0.83186	0.054398	0.3092	0.95285	-11207	0.44096	-0.85636	0.57637	0.89711	0.010644	14949			0.3299	0.36522	0.55987	-0.0078712	0.7368	0.53228	0.11327	26061
ACADM	0.17624	12438	0.044345	1392	0.80124	0.13718	0.42813	0.41169	0.67841	0.085941	0.6601	0.56459	0.63436	0.46118	0.93119	-0.26561	0.041106	0.0059593	0.29354	24006	0.07705	0.56929	0.38907	13119	0.087919	0.80209	0.13575	13174	0.077344	0.62822	0.32039	0.65918
ACADS	0.38444	-0.10745	0.20833	0.57881	0.61882	0.75452	0.86537	-0.61524	0.66198	0.41214	0.0045048	19189	0.55344	-0.84851	0.87346	0.23469	0.78552	-0.26891	0.78868	0.67089	0.883	-0.43913	0.74277	0.69801	0.67687	0.096318	0.25299	0.82867	0.63271	0.59199	0.47107	0.33301
ACADSB	0.86849	-0.37509	0.064233	0.92598	0.38903	-0.59025	0.14213	-0.31374	0.16988	15926	0.51609	0.53903	0.40463	0.7488	0.48489	0.69946	0.04802	-0.2851	0.48997	0.85788	0.24626	-19411	0.37195	14936	0.69009	-16639	0.91885	-0.69306	0.17785	-17214	0.18951	0.8262
ACADVL	0.72697	0.26646	0.14771	0.62071	0.42647	-0.39853	0.72467	-0.84638	0.90269	-10842	0.72832	-0.048323	0.68606	0.22406	0.28412	0.53169	0.83204	-0.98309			0.23484	0.14067	0.8088	-0.34873	0.14445	11228	0.52585	-0.9748	0.21347	0.12196	0.73026	-10528
ACAN	0.81989	0.26718	0.42121	0.53092	0.20718	0.94786	0.58588	-0.2414	0.22075	14207	0.25061	0.88003	0.7977	0.1627	0.15394	10372	0.21323	-11349	0.49699	12432	0.88937	-15022			0.35826	0.58849	0.47487	-0.89595	0.76908	-0.54469	0.39017	0.1926
ACAP1	0.41922	0.24058	0.39553	-0.10628	0.29824	-0.39113	0.21419	0.06528	0.97851	-0.87287	0.87583	-0.49433	0.4661	0.3851	0.91298	-0.30457	0.95134	-0.6096	0.86496	-0.60623	0.59638	-22725	0.66755	-0.81245	0.59466	-0.11734	0.91735	-0.21288	0.98895	-24217	0.73348	-0.75986
ACAP2	0.43653	-0.054503	0.47038	-0.2571	0.029126	12072	0.92826	-0.16763	0.20767	0.62348	0.47438	0.22763	0.78838	0.46693	0.59137	-0.0078798	0.94897	-15637	0.72872	-0.69803	0.61339	0.19529	0.49235	-2.1	0.94145	-23709	0.66244	0.16978	0.68882	-0.58684	0.98332	-23143
ACAP3	0.32571	0.76505	0.47228	0.67802	0.53035	0.25245			0.048164	13645	0.95903	-0.54223	0.47704	0.55485	0.73249	0.35348	0.38452	0.37877			0.30908	0.98712	0.41708	0.80282	0.48471	-0.96015	0.2614	11342	0.19841	16797	0.0063826	37233
ACAT1	0.59068	0.52407	0.84826	0.49733	0.13151	14217	0.9036	-0.16798	0.1842	10561	0.42603	0.26769	0.50658	-0.29472	0.67359	0.19135	0.37439	0.63221			0.41181	0.54873	0.9608	-19556	0.68019	-19279	0.61826	0.2862	0.94396	-19643	0.83024	-0.43537
ACAT2	0.68343	-11868	0.75064	-0.033331	0.98058	-0.76837	0.45972	0.35994	0.72716	-0.95948	0.855	0.074915	0.45571	0.28238	0.24759	0.47182	0.96034	-13361	0.11443	34006	0.58991	-0.25714	0.62048	-28113	0.39311	-2064	0.74677	-11559	0.84384	0.23437	0.33199	0.67735
ACBD3	0.6843	-0.15035	0.89806	-1028	0.20093	0.21085	0.17321	10323	0.52488	0.11245	0.53986	0.26294	0.67894	-0.044939	0.32825	-0.33548	0.43988	-0.81914			0.98977	-14765			0.76225	-10171	0.83282	-18469	0.34977	-0.27349	0.10056	-0.27178
ACBD4			0.51685	0.81841	0.34218	0.85557	0.21505	10995	0.075659	22613			0.92621	-0.49245	0.44364	0.37467	0.81107	-10714	0.76677	-0.62844	0.38788	-0.70744	0.82572	-18407	0.15431	0.91399			0.86161	-2.18	0.91412	-0.15519
ACBD5	0.043949	16256	0.29718	0.67084	0.081616	16682	0.99665	-0.93716	0.16559	0.51914	0.31189	0.80598	0.084237	19427	0.52095	-0.8194	0.34686	-0.072294	0.87844	-14937	0.74356	-0.44764	0.95349	-21958	0.13827	0.66209	0.75145	-14458	0.45549	-0.012263	0.99201	-24286
ACBD6	0.10787	13603	0.70324	0.20047	0.43819	0.044981	0.49016	0.26867	0.31653	11506	0.9262	-0.46795					0.80399	-0.95922	0.048974	39088	0.40311	0.33146			0.89588	-0.38302	0.15858	15617	0.50792	-12659
ACBD7	0.16524	1408	0.29887	-0.12925	0.47314	0.6342	0.67029	-0.14359	0.30727	1196	0.11335	12834	0.35617	10401	0.61542	0.66494	0.55395	-0.96049	0.78506	-0.77183	0.93345	-13827			0.71288	-0.21703	0.74111	-0.32372	0.73643	-0.61727	0.718	-19614
ACCS	0.9015	-0.26425	0.92708	-0.16743	0.95014	-0.62017	0.50825	0.50072	0.9072	-0.29922	0.87772	0.3879	0.82756	-0.024209	0.84406	-0.50612	0.71024	-10639	0.01004	5295	0.17131	15357	0.74825	-12818	0.91517	-25094	0.59769	0.31205	0.15318	17373	0.76865	-13793
ACCSL	0.28559	0.4857	0.54448	0.57288	0.37531	0.46548	0.29575	0.16553	0.2061	15133	0.009822	12412	0.68872	-0.15132	0.89833	-0.54142	0.75116	0.39659	0.11906	37251	0.5764	-0.27046	0.27997	20109	0.30939	-0.017637	0.75376	-0.23374	0.65805	-11767	0.3482	0.69027
ACD	0.83973	-0.14606	0.67343	-0.13648	0.67293	-0.089881	0.11801	11159	0.18687	17027	0.24047	12924	0.47274	0.85436	0.52644	-0.034971	0.81973	-10559	0.62792	0.3746	0.65258	0.083645			0.8936	-24833	0.76531	-0.47566	0.24864	0.88926	0.46738	0.34428
ACE	0.055854	0.14647	0.40844	0.30802	0.94714	-0.13983	0.86557	-0.3015	0.38694	0.73795	0.28049	-0.0025167	0.42047	0.072004	0.95991	-0.3913	0.31937	-0.092956	0.25337	25469	0.51193	-0.11356	0.55997	-0.20947	0.58915	-0.024374	0.72382	0.30176	0.97597	-15484	0.9504	-0.1199
ACE2	0.16773	-0.39961	0.10762	0.61628	0.86523	-0.10266	0.63748	-0.54453	0.082546	0.70462	0.8556	0.52762	0.89825	-0.62751	0.9583	-0.3051	0.75314	-0.49688	0.39309	17176	0.71617	-12121	0.99548	-20793	0.6002	0.054011	0.79239	-0.64444	0.15936	17082	0.89864	-14091
ACER1	0.54107	0.19795	0.31335	0.93993	0.8905	-0.93226	0.8362	-0.38099	0.19046	-0.10451	0.22657	12049	0.63417	0.0078093	0.58802	0.74789	0.7256	-14463	0.76044	-0.56374	0.52635	0.19236	0.73548	-11986	0.42395	0.29138	0.68179	-0.68087	0.43296	0.77046	0.40145	0.70725
ACER2	0.74959	0.64409	0.72669	-0.52607	0.6629	-0.86247	0.69398	0.26061	0.95267	0.34537	0.89597	0.30049	0.96472	-0.21056	0.86486	0.010735	0.49768	-0.69562	0.85616	-14707	0.70158	-0.50047	0.13384	1171	0.21058	0.089545	0.97272	-0.47855	0.45161	-10491	0.46747	0.72431
ACER3	0.88905	-0.64804	0.38256	0.62143	0.60957	-10833	0.97923	-13102	0.7857	0.37894	0.79145	0.38418	0.94809	-0.68987	0.71928	0.093263	0.60813	-0.49091	0.57504	0.6365	0.7497	-0.65028	0.92636	-17121	0.76999	-0.35226	0.8077	-0.45617	0.65789	-10957	0.7065	-0.53177
ACHE	0.027641	24789	0.16321	0.93042	0.084359	21442	0.12564	0.79648	0.57902	0.45244	0.36597	10297	0.34367	1365	0.18288	0.17121	0.24575	0.53126	0.74742	-0.47476	0.13012	1003			0.4634	-0.62046	0.56861	-0.34784	0.13573	16474	0.031642	1975-01-01
ACIN1					0.24453	10861	0.7919	0.1445			0.49048	0.46906	0.017759	22234	0.002623	13504	0.98261	-2333			0.69262	0.25353			0.93611	-0.71585	0.84269	-1546	0.21528	15269	0.80445	-0.34028
ACKR4	0.025294	31431	0.6679	-0.032426	0.65619	0.60526	0.31405	0.61565			0.66851	0.28449	0.32434	0.81596	0.87356	-0.65065	0.02285	-1822	0.30454	23882	0.70571	-0.47148	0.25194	20289	0.35379	0.77685			0.45641	-0.51928	0.06561	30747
ACLY	0.58074	0.064139	0.14468	0.79346	0.58694	0.52646	0.2089	0.36196	0.16599	-11483	0.97531	-0.49805	0.71381	-0.37796	0.98652	-1666	0.35661	0.69299	0.21441	23868	0.66453	-24247	0.55665	-0.054307	0.84732	-0.4899	0.94763	-14101	0.79964	-0.19549	0.071989	0.69283
ACMSD	0.76341	0.70697	0.64407	-0.52568	0.31229	10903	0.34621	0.59115	0.71008	-0.039279	0.2756	12861	0.034535	26812	0.73397	-0.064044	0.88867	-0.88193			0.5264	-0.81339			0.46283	-0.28738	0.84118	0.20351	0.083955	17386	0.19776	12246
ACN9	0.066088	21274	0.49862	0.78226	0.39643	11849	0.33735	0.69252	0.016003	23907	0.62513	0.060791	0.83532	0.5091	0.33041	-0.26882	0.82699	-0.41635	0.30426	18759	0.26382	0.02519	0.46644	0.51985	0.41212	0.66616	0.64081	-0.70734	0.43223	0.62179	0.22078	14715
ACO1	0.82114	-0.16476	0.91728	-13921	0.26153	11012	0.66767	0.52484	0.88491	-0.98803	0.053046	14481	0.70376	0.32319	0.16579	10544	0.90984	-0.73472	0.23593	2771	0.90784	-13518	0.29891	0.42261	0.67213	0.0099542	0.047317	16733	0.30278	10069	0.83339	-18235
ACO2	0.12385	0.246	0.14633	0.91585	0.35805	-0.18015	0.0012121	1238	0.21258	0.86251	0.031495	12141	0.60374	-0.35183	0.095017	0.9617	0.34224	-0.23412			0.6382	-0.39887	0.43303	0.73796	0.32221	0.65205	0.4833	-0.55188	0.88148	0.44378	0.11134	20141
ACOT1	0.52199	0.41077	0.12672	0.98736	0.79835	-0.065644	0.585	0.15045	0.94148	-0.80098	0.09682	0.44171	0.59913	0.1326	0.76737	-0.32845	0.33297	0.27982	0.68765	-0.034395	0.26927	10676	0.28272	19816	0.17052	-17711	0.041189	25005	0.10028	-0.77497	0.63952	0.16584
ACOT11	0.27282	1057	0.84389	-0.27719	0.97875	-10193	0.20875	0.79777	0.50421	-0.46538	0.147	13168	0.47434	0.71794	0.87653	-0.96182	0.029614	0.15625	0.19811	12115	0.46451	-11448	0.84126	-19607	0.92636	-11472	0.30774	0.92266	0.45204	-0.12345	0.69049	-13999
ACOT12			0.14391	11936	0.7338	-0.15115	0.75863	-0.56732	0.22764	14708	0.73576	0.2319	0.78302	-0.56018	0.37247	0.8552	0.52377	0.48222			0.99633	-23062	0.44037	12196	0.3559	0.78068	0.46698	0.064143	0.67643	-12051
ACOT13	0.44315	0.53263	0.51665	0.61162	0.64363	0.29497	0.62814	0.19706	0.85419	-0.011458	0.92549	-0.30569	0.0073956	23129	0.87899	0.40729	0.54044	-0.27631			0.31874	0.6281	0.069993	40029	0.16354	0.25186	0.37656	-0.30049	0.17177	13135	0.84972	-12688
ACOT2	0.62138	0.58448	0.48609	0.080122	0.14845	0.19425	0.90138	0.010785	0.64477	-0.13123	0.88494	0.1275	0.48263	0.45739	0.86244	-0.34006	0.56481	-0.35249	0.67675	10197	0.57262	-0.56025			0.79523	-1403	0.98297	-28584	0.3434	0.92623	0.99467	-38119
ACOT4	0.62999	0.059025	0.6223	0.023032	0.53757	0.19513	0.97054	-0.19179	0.52741	-0.06955	0.72151	0.11523	0.32836	0.91954	0.94583	-0.55721	0.076525	14968	0.48148	13057	0.53083	0.49641	0.50632	-0.47418	0.4545	-0.074355	0.00372	-0.48661	0.82576	-19252	0.84339	-17114
ACOT6	0.62115	-0.2446	0.15312	0.91072	0.007989	0.50824	0.44948	0.18486	0.18478	1269	0.59444	-0.52392	0.71826	0.20204	0.018863	11969	0.87159	-0.73082	0.32897	1398	0.13101	13677	0.90798	-25336	0.001649	34844	0.17283	0.97686	0.011834	10956	0.0034539	46251
ACOT7	0.50205	0.42513	0.39572	0.61636	0.82344	-0.66428	0.91536	-0.98951	0.33601	0.15329	0.88088	-0.030773	0.93375	-11675	0.89246	-10242	0.57642	-0.059352	0.16739	32973	0.57484	0.062437	0.24042	2103	0.28437	0.98796	0.44492	0.24391	0.52988	0.40606	0.63508	-0.055102
ACOT8	0.76181	-0.40952	0.16601	0.87717	0.97206	-10443	0.96664	-0.43854	0.28837	10559	0.91499	0.17309			0.88948	-0.50568	0.36077	-0.12762	0.60965	0.47064	0.15745	11809			0.37701	0.6975	0.14236	12093	0.9189	-23833	0.23443	16558
ACOT9	0.090055	-0.72086	0.1772	10157	0.65324	0.067563	0.42324	0.50398	0.0059092	21606	0.0097761	0.86658	0.32209	0.73742	0.30921	0.42772	0.81433	-14978	0.035149	41802	0.75918	-0.030328	0.66726	-0.74885	0.65473	0.12612	0.19368	-0.83179	0.33574	11577	0.26183	14817
ACOX1	0.23921	0.49682	0.14351	0.30052	0.74682	0.13342	0.50724	0.35775	0.69763	0.373	0.73315	0.46481	0.61538	0.26917	0.28493	0.2889	0.75291	-2298	0.37702	12667	0.51975	0.55198	0.54257	0.017756	0.68366	-0.13176	0.67927	-0.2786	0.43494	-0.93418	0.73397	0.61382
ACOX2	0.77067	-0.1007	0.43658	0.43784	0.76662	0.52898	0.96614	-0.75084	0.89483	-0.34769	0.13948	13901	0.81425	-0.6507	0.81783	-0.64741	0.85824	-0.26003	0.62549	0.92307	0.98001	-14748	0.26136	-0.017865	0.43416	0.29892	0.70958	-0.37042	0.082781	10599	0.68068	0.4129
ACOX3	0.0021486	17538	0.13642	0.76004	0.71571	0.18424	0.64127	-0.15055	0.69291	0.58305	0.36049	0.26177	0.2899	0.76441	0.0041843	20264	0.61254	-0.84761	0.034084	31015	0.34952	-11816	0.41312	1131	0.022633	0.53345	0.7969	-0.44342	0.7668	-15253	0.62882	-0.022272
ACOXL	0.97116	-0.79033	0.631	-0.082068	0.44432	0.26599	0.24641	-0.81926	0.75725	-0.42174	0.50897	0.14054	0.25924	1406	0.57136	0.61087	0.85717	-0.9221			0.021578	10723	0.52697	0.60043	0.21329	13705	0.067337	20704	0.84557	-0.69278	0.72705	-0.67783
ACP1	0.9255	-13262	0.99694	-11206	0.84704	-0.014797	0.98467	-0.25034	0.90879	-0.45005	0.79213	0.065267	0.49092	0.10623	0.73772	-0.42483	0.3479	-13055	0.91834	-16272	0.059233	12619	0.77574	0.038991	0.32074	0.86547	0.46632	-0.22263	0.025478	21902	0.65041	-28125
ACP2	0.52329	0.14954	0.8263	-10674	0.93888	-11367	0.58778	-0.2702	0.013606	23483	0.52357	0.15551	0.94035	-1.23	0.68878	0.064088	0.26148	0.46172			0.2623	0.97514	0.812	-0.8756	0.91558	-17552	0.88108	-0.25748	0.46423	0.76483	0.74213	-11859
ACP5	0.064686	18884	0.21003	0.44112	0.11719	20222	0.13479	11634	0.56135	0.72994	0.19481	11262	0.49781	0.60091	0.83949	0.07801	0.40882	0.51818	0.10745	37619	0.29292	0.92009			0.56734	-0.039665	0.65638	-0.86756	0.21531	11015
ACP6	0.58666	0.43679	0.66049	-0.045366	0.74775	-0.36441	0.6193	-0.52263	0.72217	0.12591	0.96306	-0.94494	0.99998	-19573	0.9228	-0.35091	0.78914	-0.87982	0.39984	-0.89311	0.86086	-0.84812	0.8671	-19086	0.57962	0.47066	0.71817	-0.44345	0.92581	-0.28209	0.52737	0.11217
ACPP	0.82693	-0.77626	0.80241	-0.0065713	0.49489	0.35934	0.5161	-0.026022	0.26832	0.7926	0.98981	-0.59123	0.87349	-10454	0.70958	0.30051	0.94604	-0.85841	0.4235	21084	0.87036	-0.060782	0.93884	-0.79346	0.35474	0.074153	0.45624	0.49911	0.93227	0.31637	0.51507	-10442
ACPT	0.48661	0.93806	0.7686	0.36943	0.35989	0.76244	0.13045	-0.26475	0.3722	-0.058359	0.79834	-0.58414	0.70414	-0.041826	0.12566	0.83118	0.63141	-0.32167	0.15523	12694	0.77217	-0.10799	0.59226	-0.28266	0.18346	15351	0.70885	-0.76173	0.56063	-18286	0.35087	0.22198
ACR	0.98588	-0.39216	0.96474	-0.45602	0.18924	12112	0.73782	-0.37967	0.96972	-0.95297	0.90717	-0.65571	0.23269	13916	0.17678	0.34083	0.22876	-19856			0.35903	-0.15905			0.92801	-3515	0.74661	-0.11183	0.46787	-0.31884	0.43804	-2265
ACRBP	0.2691	0.23829	0.29134	-0.14782	0.61539	0.0013705	0.98164	-0.85351	0.73725	-0.60264	0.27768	11597	0.025069	28857	0.3058	0.81792	0.7143	-0.6896	0.13975	34766	0.69903	-0.89532			0.031309	24725	0.086401	0.43525	0.57478	0.16235	0.52991	-0.91621
ACRC	0.34159	0.92067	0.72195	-0.40775	0.18862	12447	0.28205	0.74742	0.88589	0.27048	0.32169	0.70003	0.28862	0.87868	0.71839	-0.14875	0.1079	14195	0.18399	32725			0.032119	0.44623	0.45993	0.12436	0.31963	0.95666	0.93463	-21325	0.46507	0.37284
ACRV1	0.42817	0.60781	0.47547	0.11989	0.68974	-0.032456	0.061428	14953	0.8643	-0.94568	0.76743	0.17713	0.59874	0.11149	0.12344	13457	0.11317	1503	0.19467	31319	0.030471	24016	0.21108	2355	0.1287	18446	0.21977	-14667	0.045308	2265	0.92998	-25977
ACSBG1			0.4561	0.65014	0.54453	0.29642	0.12392	11488	0.64128	0.66072	0.83465	-0.27112	0.63164	0.59865	0.8888	-0.99988	0.16237	-0.13318	0.14656	34136	0.32668	10474	0.21123	24834	0.81724	-0.49697	0.14838	0.87495	0.31952	-0.068413	0.087426	19718
ACSBG2	0.68338	0.85096	0.079809	0.17903	0.82891	-0.68458	0.7739	-0.034742	0.71676	0.14838	0.1079	0.44616	0.63083	0.019036	0.73162	-0.4606	0.22326	0.023079			0.20921	-0.48263	0.9599	-31017	0.46953	-14218	0.44268	0.55776	0.77996	-0.32071	0.77976	-16543
ACSF2	0.4772	0.83823	0.98818	-11822	0.6344	0.74225	0.070213	-0.15468	0.04874	-0.99157	0.72196	-0.11541	0.73586	0.61879	0.52391	-0.27058	0.29322	-0.46061			0.1259	-0.43893	0.55062	-0.29085	0.19456	-0.29607	0.46674	0.24022	0.67005	0.54382	0.5642	0.3178
ACSF3	0.86516	-0.42953	0.64317	0.13346	0.44571	0.92262	0.23378	0.45667	0.16876	1942-01-01	0.47944	0.30292	0.44285	0.94968	0.75332	-0.52758	0.38261	0.60521	0.56666	14922	0.80306	-0.6729			0.88181	-16997	0.79298	-15659	0.19497	16194	0.59147	-0.35001
ACSL1	0.99125	-0.91977	0.86038	-0.44227	0.62705	0.014238	0.91527	-0.086895	0.87208	-0.67479	0.39854	0.11848	0.25846	1096	0.46284	0.035519	0.44466	0.44459	0.90428	-11429	0.97289	-10895	0.39067	12545	0.55101	0.21009	0.52608	-10237	0.43428	-23317	0.97937	-16071
ACSL3	0.89712	-0.11307	0.95521	-0.04353	0.63418	-0.10372	0.96286	-0.16905	0.78073	0.41193	0.7097	0.060046	0.59025	0.20425	0.040594	10074	0.42784	0.40187	0.52637	0.95084	0.84187	-0.38399	0.99899	-2561	0.52497	0.50076	0.30254	0.56023	0.76176	-0.67011	0.61818	-11926
ACSL4	0.60955	-0.060253	0.40722	0.468	0.33909	0.81135	0.91736	-12541	0.9467	-15909	0.09969	10098	0.6383	0.24117	0.84924	-0.74207	0.50375	0.43158	0.41498	21028	0.53392	0.16333	0.4453	1197	0.1108	1252	0.96722	-0.40238	0.72327	-1454	0.21247	16549
ACSL5	0.70952	0.31889	0.83548	-0.30854	0.21076	11509	0.17127	0.69589	0.4727	0.76237	0.66858	-0.68168	0.98872	-12943	0.27331	0.35456	0.82663	-0.072881	0.65388	0.83974	0.86495	-0.19503	0.67063	0.46567	0.28741	0.072702	0.60987	-18946	0.25267	14812	0.52447	0.10316
ACSL6	0.069115	-12203	0.89659	-0.81356	0.62208	0.53042	0.4606	0.19716	0.73844	0.19802	0.36744	10271	0.84349	-0.65326	0.97965	-0.9958	0.40982	0.10874	0.63981	0.29325	0.19019	13515	0.25067	20496	0.37561	0.7567	0.0066178	1878	0.90221	-24752	0.36122	-0.23956
ACSM1	0.82222	-0.75585	0.29001	-0.27592	0.063222	17639	0.36884	0.46473	0.0934	15813	0.20745	11648	0.57692	-0.046157	0.38891	0.043756	0.57793	-0.01191	0.018354	50049	0.10638	0.62204	0.76344	-0.37182	0.44651	0.13606	0.23714	0.91483	0.85706	-0.92556	0.34597	-0.12879
ACSM2A	0.135	10446	0.41362	0.79937	0.60604	0.0093603	0.67782	0.18255	0.6176	-0.052927	0.56725	-0.25279	0.063876	1574	0.12373	11525	0.29044	0.72182			0.38469	0.23021			0.71973	-0.9157	0.0053295	0.36717	0.15513	18137	0.97872	-32488
ACSM2B	0.6375	0.29419	0.061148	13321			0.27432	0.89951	0.34103	0.94147	0.3877	0.54843	0.20752	15929	0.95641	-0.22863	0.88269	-10179	0.71653	-0.26382	0.37774	-0.93353	0.8555	-20808	0.55619	-23353	0.33233	-0.90953	0.33967	0.5666	0.28996	0.22848
ACSM3	0.98183	-0.66844	0.88754	-0.25332	0.25422	0.60708	0.06614	10015	0.58473	0.61637	0.54893	0.48283	0.28796	0.74828	0.36055	0.40079	0.18912	10163			0.66437	0.41612	0.74117	-12386	0.22802	12758	0.21867	0.89625	0.5709	-15182	0.085005	14084
ACSM4	0.25508	14855					0.58183	0.15576	0.03691	14981	0.1486	11268	0.81663	0.17111	0.70664	0.6397	0.31988	0.49193	0.70706	-0.18194	0.30375	-0.63677	0.75767	-0.4006	0.75779	0.38073	0.72174	-0.72767	0.88673	-23734	0.65098	-0.66468
ACSM5	0.65007	-0.19049	0.002523	22163	0.4977	0.94348	0.31087	0.71065	0.6332	0.23928	0.71305	-0.54721	0.86747	-0.41769	0.37439	0.28911	0.58559	0.21676	0.60293	0.52413	0.63649	0.32462	0.54664	-12345	0.92237	-11365	0.77697	0.044139	0.11842	10182	0.68089	0.35831
ACSS1	0.96736	-0.45025	0.78443	0.28762	0.99757	-0.95753	0.68268	-0.25601	0.39028	0.96339	0.82065	-0.25923	0.37354	0.70664	0.60252	-0.7957	0.86457	-0.63086	0.89867	-0.038449	0.55284	-0.30555	0.20021	27963	0.13581	0.86426	0.96227	-0.54307	0.51358	0.10149	0.84847	-21345
ACSS2	0.93108	-0.68392	0.92765	0.28809	0.60059	-0.40875	0.50805	-0.5346	0.072073	-0.91746	0.88534	0.10645	0.19831	0.15766	0.94636	0.065183	0.58409	0.36854	0.76762	-0.66211	0.064197	10368	0.91632	-25983	0.28189	0.89558	0.080828	0.92695	0.89632	-0.99631	0.89505	-21849
ACSS3			0.0023941	27295	0.88409	-0.259	0.33564	0.42149	0.39078	0.77534	0.33114	0.81332	0.40403	0.87151	0.1674	12345	0.23323	12707			0.97306	-21328	0.35608	0.59623	0.75332	-0.069447	0.31103	0.60961	0.64986	-11929	0.24349	16259
ACTA1	0.865	-0.022102	0.40803	-0.16913	0.5528	-0.036495	0.80376	0.24334	0.22224	-0.18784	0.74464	0.12377			0.98888	-0.82495	0.37995	0.57618			0.93866	-0.69532	0.39594	0.89577	0.90785	-10278	0.9688	-14823	0.10271	15661	0.60516	0.45024
ACTA2	0.84413	-0.77534	0.51654	-0.89087	0.43569	0.61792	0.82042	-0.58967	0.55465	0.78682	0.70444	0.67026	0.76911	0.534	0.42684	0.3378	0.47333	-11414	0.86587	0.16114	0.83218	-0.74156	0.23827	16341	0.94067	-19147	0.19828	0.86905	0.29639	-0.785	0.65792	0.37318
ACTB	0.050036	21363	0.77179	-0.5478	0.99461	-0.76174	0.94051	-10871	0.1594	0.44747	0.78471	-0.53208	0.66057	0.3989			0.77582	-14153			0.93746	-14371	0.93654	-2823	0.323	0.56986	0.38617	0.74662	0.28369	12387	0.32772	11163
ACTBL2	0.77377	0.72587	0.12549	10958	0.15666	14131	0.3539	0.45502	0.25143	13748	0.64888	0.18163	0.21239	10706	0.97575	-0.47837	0.18193	13219			0.47315	-12167	0.50278	-0.064028	0.75565	-0.20614	0.39384	0.065176	0.68271	-0.9946
ACTC1	0.43967	0.68102	0.4246	0.63071	0.36941	-0.1345	0.63171	-0.59977	0.50385	0.68002	0.50018	0.39114	0.2333	14687	0.2799	0.63199	0.63199	0.18268			0.019645	1076	0.85423	-20704	0.62078	-1355	0.49863	0.66365	0.25095	12818	0.83333	-18024
ACTG1	0.069369	15967	0.69086	-0.24669	0.67439	-0.089997	0.49154	0.19995	0.15476	18042	0.71265	-0.20659	0.75617	-0.33378	0.54275	0.1686	0.28076	0.91171	0.68091	0.0016044	0.24162	11621			0.13339	14607	0.4709	0.11904	0.12919	-0.13582	0.67465	-0.80884
ACTG2	0.032778	1663	0.33916	0.74867	0.13756	17527	0.17361	0.86985	0.6776	0.47972	0.42818	0.29355	0.049814	12458	0.37419	0.64977	0.4324	0.60224			0.0037796	29465	0.49853	0.32614	0.40026	0.70489	0.24838	11629	0.7147	-0.48007	0.73059	-13744
ACTL10	0.37569	0.26564	0.64721	0.39379	0.81398	0.10427	0.52812	-0.41818	0.60331	0.54251	0.93324	0.19608			0.21984	0.7157	0.086113	0.66451			0.64945	-13783	0.56007	-0.091093	0.7161	-0.58044	0.4019	-0.63502	0.75564	-0.63627	0.93877	-15412
ACTL6A	0.95229	-0.77674	0.17963	0.95179	0.98616	-0.50872	0.68701	0.066223	0.87671	-0.4773	0.00065665	18864	0.9581	-0.035789	0.82717	-0.60348	0.37291	-15047	0.37666	19617	0.31291	0.015873			0.54499	0.61325	0.0473	31174	0.64181	-0.78803	0.84534	-18867
ACTL6B	0.2953	-0.27369	0.39253	0.25011	0.18205	13727	0.70651	0.28912	0.31262	0.35655	0.70957	0.32931	0.3412	1025	0.62729	-0.44166	0.11113	0.7383	0.48109	19766	0.61194	0.019525	0.93619	-1477	0.49883	-11677	0.53289	0.03175	0.045585	15039	0.28226	0.94592
ACTL7A	0.8712	0.18347	0.71496	-0.03954	0.73848	0.29697	0.3273	-10996	0.73159	0.63865	0.60929	-0.16418	0.70341	1028	0.78908	0.21179	0.31137	-27241			0.055232	0.30343	0.60788	-0.40715	0.12077	0.67459	0.74127	-11081	0.82506	-19087
ACTL7B	0.69602	-0.17195	0.82467	-0.52093	0.29494	0.89062	0.62371	0.38877	0.9096	-0.73905	0.256	0.61647	0.29869	0.68419	0.62481	0.011319	0.53778	-0.26057	0.22133	1588	0.76611	0.404	0.40356	-0.24839	0.94411	-0.79967	0.35239	0.80717	0.59075	-12513	0.83664	0.48165
ACTL8	0.50772	0.94502	0.29005	0.83733	0.45303	0.12897	0.93348	-13096	0.43104	-0.057174	0.55305	0.23179	0.34315	0.97215	0.97903	-0.74262	0.030683	17101			0.71221	-0.22355	0.84464	-19909	0.1946	14319	0.52438	-0.36782	0.29987	11489	0.65599	-0.13293
ACTL9	0.014726	1318	0.080608	10215	0.60014	0.55474	0.088387	11408	0.55218	0.48683	0.049449	-0.42973	0.63397	0.74575	0.029436	18127	0.78476	-10113			0.77939	-0.68072	0.8275	-0.98902	0.21464	0.14579	0.52559	0.46956	0.034653	2033	0.11388	0.95371
ACTN1	0.32942	0.41641	0.73967	-0.26558	0.62213	0.14418	0.82911	-0.82446	0.46447	0.43374	0.038946	1547	0.76622	0.67799	0.10112	0.67285	0.74326	-10206	0.68081	0.0016354	0.018401	16958	0.11107	34561	0.71581	-13578	0.043287	11099	0.63955	-0.40426	0.97761	-10706
ACTN2	0.20579	-0.75679	0.82086	-0.2095	0.80677	-0.38682	0.26508	-0.1779	0.76096	0.723	0.2434	0.93196	0.86867	-0.17767	0.3933	0.38619	0.99287	-14277	0.50849	11505	0.82562	-0.29594	0.67712	-0.82227	0.65469	0.18582	0.90095	-0.28925	0.46392	-18862	0.52272	0.74726
ACTN3	0.75298	-0.33551	0.087162	17451	0.788	-0.5048	0.87628	-0.33705	0.19737	15679	0.48875	0.36918	0.76894	-0.44325	0.2103	11493	0.25893	10098	0.41265	17148	0.79763	-0.15908			0.4354	0.29544	0.48664	-0.1332	0.47915	0.45287	0.3216	12476
ACTN4	0.56926	-0.43894	0.91129	-0.81697	0.072538	15632	0.79835	0.22541	0.65851	0.55245	0.09858	11721	0.75966	-0.42683	0.84406	0.086701	0.25012	-0.33912	0.80233	-0.93368	0.53075	-0.95422	0.38184	10318	0.56165	-10963	0.41405	0.26953	0.32798	12928	0.95748	-20339
ACTR10	0.48781	0.62854			0.34303	0.18315	0.1578	0.57571	0.14748	1265	0.73715	-0.20239	0.27456	0.86028	0.37568	0.86039	0.60799	-10941	0.77316	-0.65259	0.64033	-0.49888	0.080732	32085	0.97974	-17209	0.16213	16881	0.18743	17503	0.96516	-15926
ACTR1A	0.97661	-13715	0.6978	0.10891	0.42649	0.47174	0.077682	14012	0.73122	-0.38531	0.55656	0.22765	0.77742	0.41677	0.97088	-12085	0.40735	0.60064	0.97751	-31642	0.62234	0.2126			0.81874	-10939	0.34054	-0.21205	0.10972	13541	0.80318	-20445
ACTR1B	0.7667	0.6053	0.42728	0.59128	0.96043	-13733	0.53426	0.1687	0.11763	13689	0.34845	0.92434	0.84452	-0.095468	0.59939	0.85901	0.87015	-14744	0.52053	1073	0.97039	-16105	0.7108	0.16245	0.67394	-1003	0.9563	-13144	0.46508	-0.60752	0.86974	-20791
ACTR2	0.73666	-11519	0.59131	0.00094572	0.15461	13686	0.076228	0.89837	0.4356	0.53017	0.13753	-0.17021	0.19838	1317	0.18425	0.88095	0.74917	-13378	0.74045	-18438	0.37251	0.65678	0.23581	2159	0.17053	0.53645	0.69416	-11696	0.67159	-11808	0.78917	-0.90538
ACTR3	0.25243	13495	0.35111	-0.65668	0.89826	-0.46818	0.32676	0.69098	0.90428	-0.62537	0.12523	15847	0.12909	17417	0.27631	0.9774	0.80981	0.05966	0.31451	23036	0.98588	-16361	0.40425	0.1097	0.059248	1714	0.8436	-0.64808	0.14169	0.13875	0.65096	-0.66683
ACTR3B			0.84934	-0.35165	0.61665	0.64207	0.28096	0.06736			0.75725	-0.44187	0.40531	0.7861	0.17498	12735	0.067133	0.43331	0.20124	2971	0.051282	21682			0.841	-13579	0.017663	20564	0.81533	-10583	0.43778	-0.38422
ACTR3C	0.36132	14253	0.18895	11871	0.43524	0.12349	0.75767	-0.1994	0.41375	0.67013	0.57302	0.1759			0.26715	0.65579	0.13989	0.79854	0.083004	41406	0.79668	-0.6196	0.0092259	53693	0.036438	28387	0.36512	-0.06304	0.49719	0.72832	0.75174	-12856
ACTR5	0.071235	-0.25764	0.97506	-0.71559	0.64172	-0.038883	0.5018	0.15508	0.18751	13652	0.091082	0.63713	0.36809	0.63985	0.30043	0.89048	0.32092	0.72194	0.089681	38795	0.12741	11615			0.29816	0.19854	0.43965	-0.93312	0.81537	-18209	0.81645	-17088
ACTR6	0.73937	0.17313	0.53723	0.18535	0.082936	17319	0.10226	12271	0.13768	18833	0.3849	0.95826	0.02596	21682	0.025849	18148	0.16501	11069			0.29089	0.50002	0.42546	-0.0020912	0.82019	-0.40487	0.95657	-25862	0.44988	0.57401	0.85708	0.049193
ACTR8	0.418	0.31179	0.17153	0.94704	0.71067	-0.34647	0.25883	0.79816	0.46775	-0.062901	0.24823	11221	0.68918	-0.243	0.25635	10586	0.73861	-0.33976	0.66057	12113	0.38907	-0.38012	0.41332	0.72999	0.9308	-13259	0.84993	-0.61414	0.79667	-0.39504	0.057535	22192
ACTRT1	0.28489	0.99422	0.56653	0.052571	0.90971	-1025	0.57921	0.7936	0.69099	-0.29195	0.62511	-0.14389	0.028003	30352	0.075423	14811	0.73153	-0.36506			0.0008204	46093	0.020082	3886	0.59058	-15232	0.43251	0.32337	0.46227	0.27902	0.96559	-10312
ACTRT2	0.31732	0.35946	0.2975	-0.13267	0.75944	-0.13905	0.75559	0.015133	0.17644	0.99191	0.77217	-0.23294	0.74994	0.26488	0.67178	-0.060785	0.46039	0.40864			0.202	1315	0.75243	-13263	0.41219	0.18862	0.35416	0.36696	0.61048	-0.16747
ACTRT3			0.45432	0.61007	0.054269	26017	0.51671	0.12807	0.082509	24856	0.28764	11551			0.11622	13529	0.92085	-19659	0.15196	33796	0.49928	0.45957	0.20359	24817	0.63409	-0.31232	0.16322	13201	0.069882	0.78849
ACVR1	0.38643	-0.46422	0.28482	-0.78255	0.83579	0.42026	0.76409	-0.7873	0.52951	-0.23824	0.81805	-0.30567	0.52727	0.51293	0.99869	-13441	0.86233	-10242	0.91733	-0.78852	0.82446	-0.86483	0.31861	-0.21894	0.72647	-0.13043	0.3875	-0.097303	0.63476	-1236	0.9615	-33925
ACVR1B	0.95605	-11707	0.76438	0.12411	0.62589	-0.14349	0.12176	0.14807	0.2301	0.26951	0.56302	0.12864	0.24895	1305	0.22623	0.74758	0.33062	0.59895	0.69684	-0.17559	0.98547	-0.71174	0.9235	-17874	0.33707	0.6993	0.73397	-0.6532	0.65826	0.066329	0.72893	-10685
ACVR1C	0.48624	-0.3699	0.47324	0.61103	0.8975	-0.37975	1	-12849	0.72171	0.37442	0.28577	-0.49745	0.72116	0.43053	0.86447	-0.66653	0.89444	-10368	0.6057	0.68329	0.68349	0.234	0.4922	0.85762	0.81532	-0.066566	0.76241	-0.44992	0.7069	-0.59387	0.39004	0.43692
ACVR2A	0.76612	0.076163	0.53858	0.23289	0.87233	-0.2422	0.33639	0.093054	0.60162	-0.25381	0.93073	-0.4494	0.91153	-13812	0.90374	0.049774	0.14648	0.26925	0.8419	0.82517	0.57298	-0.2814	0.89916	-0.47505	0.8659	-0.068563	0.94322	-0.52516	0.2293	0.8224	0.15567	1752
ACVR2B	0.24751	0.99527	0.99144	-0.11891	0.1921	0.32825	0.94916	-0.15997	0.97846	-0.27126	0.73574	-0.86904	0.90788	-1271	0.63972	0.65691	0.84859	-1881	0.40346	16936	0.55163	0.0257	0.44602	0.59896	0.49862	-0.86756	0.20004	0.71414	0.82941	-15099	0.69843	0.2372
ACVRL1	0.55171	-0.087782	0.70577	-0.44268	0.57712	0.49906	0.82899	0.097373	0.97087	-0.4373	0.73069	0.28406	0.49048	0.79483	0.98655	-0.92723	0.42848	0.57384	0.16044	34859	0.33067	0.73205	0.52042	0.55064	0.63588	0.19353	0.69742	-0.4114	0.65583	-0.14064	0.65565	-0.038292
ACY1	0.0026483	25949	0.058306	0.89245	0.30371	10163	0.38315	0.36781	0.12953	1981	0.5272	0.34245	0.9658	-14816	0.26808	0.56172	0.29364	0.81087			0.54665	-0.34356	0.64273	-0.60508			0.79945	-15885	0.75523	-0.25114	0.593	0.73083
ACY3	0.26372	11398	0.38417	-0.14389	0.46458	0.20308	0.43722	-10809	0.96172	-13063	0.35362	0.20458	0.51475	0.5923	0.89065	0.38828	0.98064	-19262	0.8037	-0.79435	0.62164	-0.0063866	0.62961	0.12314	0.79104	-11439	0.53497	-0.81283	0.5149	-0.12795	0.93147	-0.0508
ACYP1			0.80381	-0.098622			0.41269	0.40821	0.27755	12158	0.449	0.58105	0.23161	15082							0.20557	13974	0.79874	-16377			0.794	-0.3199	0.70675	-0.50851	0.55529	0.45115
ACYP2	0.22906	-13307	0.49395	-0.43056	0.80083	-0.20537	0.31065	0.28448	0.99992	-13509	0.98342	-0.81504	0.58097	-0.73613	0.98952	-0.83718	0.82758	-11941	0.45664	13681	0.32256	-0.079906	0.39233	12578	0.69876	-18113	0.36189	0.74122	0.8045	-0.56116	0.63092	0.47242
ADA	0.69924	0.6844	0.40314	0.25178	0.941	-0.77978	0.12488	0.8003	0.79102	0.33896	0.787	-0.5099	0.51256	0.54489	0.68947	-0.54066	0.93187	-0.27761	0.10414	37106	0.72679	-16259	0.9018	-0.77851	0.84924	0.10414	0.12599	13266	0.47977	-0.82561	0.16114	-0.16228
ADAD1	0.34507	0.20055	0.74602	-0.095114	0.012262	16986	0.39512	0.42239	0.15308	16089	0.18687	12094	0.002963	27108	0.33611	0.90158	0.3406	0.7744	0.68276	12674	0.46378	-0.14591	0.60363	-0.36137	0.38368	0.0079533	0.072036	16691	0.60255	-0.52677	0.51207	0.096709
ADAD2			0.50354	0.016122	0.019656	0.78418	0.41221	0.66686	0.86871	-0.19011	0.10015	-0.50686			0.61872	0.81877	0.17819	12013			0.18662	0.98928	0.51685	0.61041	0.63521	-0.62653			0.12726	18155	0.17806	20739
ADAL			0.83438	0.35431	0.87226	-0.15839	0.058186	0.75793	0.10156	15464	0.96076	-0.34518	0.17847	0.57557	0.13533	10595	0.71845	-0.92837	0.35248	21115	0.54122	-0.37964	0.77957	-1511	0.78538	0.17377	0.25006	0.79483	0.43201	-0.46779	0.18854	13412
ADAM10	0.9288	-1025	0.99906	-12257	0.5892	0.16122	0.81305	-10693	0.95617	-10622	0.97921	-0.26502	0.58425	0.47125	0.78174	-0.36599	0.10846	-0.85747	0.61774	0.95414	0.043516	-0.93561	0.076104	15069	0.97593	-16814	0.98211	-13515	0.74619	-0.80465	0.93594	-0.74982
ADAM11	0.64694	0.67159	0.20988	0.7871	0.3761	0.69705	0.016658	14936	0.68069	0.48822	0.70192	-0.090161	0.73008	-0.25256	0.50918	0.5382	0.80709	-10498	0.3614	19772	0.45678	-0.19085	0.74891	-12807	0.56674	-0.50352	0.72669	-11091	0.88416	-0.16003	0.54324	0.72629
ADAM12	0.054512	-11001	0.95831	-0.1297	0.71806	0.36241	0.63683	0.18919	0.4307	0.54683	0.26087	-0.49083	0.7921	0.69776	0.48907	0.35086	0.33022	0.68988	0.40535	15884	0.26907	0.6385	0.87978	-15844	0.81768	-16926	0.67258	-0.5709	0.50035	-10785	0.66386	-12123
ADAM15	0.13032	0.59701	0.33409	0.53531	0.95692	-13458	0.95408	-0.14336	0.428	0.61753	0.98282	-0.78017	0.78131	0.069727	0.5663	0.69431	0.86519	-19883	0.3771	18777	0.41434	-0.53962	0.52877	0.077471	0.96	-27323	0.82085	-0.54747	0.40647	0.39292	0.72318	-11011
ADAM17	0.56226	0.50757	0.10226	0.92475	0.94812	-0.29509	0.70732	0.37464	0.98402	-14655	0.95226	-0.26457	0.37877	-0.10721	0.98956	-12228	0.97945	-12305	0.10534	36777	0.89646	0.40065	0.54926	0.19974	0.98647	-0.88783	0.89369	-0.026399	0.87727	0.39816	0.349	0.86897
ADAM18	0.81639	-0.33288	0.65596	0.091721	0.72738	0.6946	0.44138	0.3213	0.091577	-0.015436	0.30407	0.27975	0.68936	-0.85948	0.93069	0.28324	0.6191	-11881	0.87997	-0.86341	0.84928	-0.013743	0.22245	21855	0.46186	-0.33764	0.054186	-0.1072	0.26205	12249	0.97664	-22279
ADAM19	0.69961	-0.21198	0.94183	-0.086998	0.046345	17712	0.36498	0.44637	0.40333	0.39931	0.11961	16746	0.1395	14461	0.36232	-0.25201	0.17132	0.85638			0.03912	15604	0.0098942	22484	0.75362	0.21557	0.0095529	21665	0.97711	-22279	0.18791	15921
ADAM2	0.39795	0.79841	0.47525	-0.81304	0.86672	0.26226	0.16787	0.78055	0.17651	1387	0.39813	0.23662	0.99492	-12022	0.015566	11049	0.28514	0.70435			0.70467	-0.66206			0.95918	-1852	0.5072	-0.0046717	0.99887	-20653	0.079889	16296
ADAM20	0.20295	0.029903	0.5958	-0.55906	0.10324	22011	0.78031	-0.15624	0.12233	0.3633	0.95182	-0.02873	0.83471	0.29008	0.99937	-19552	0.77916	-0.23856			0.30243	0.85871	0.0063448	42814	0.47186	0.30726	0.94898	-15003	0.82342	-1545	0.67673	0.52804
ADAM21	0.97884	-0.54247	0.83295	-0.94381	0.69979	-0.28189	0.73025	0.1781	0.18193	0.54606	0.78719	-0.31248	0.12808	2085	0.028244	20494	0.65916	-0.8397			0.97616	-18216	0.71689	-10824	0.86849	-13073	0.73434	-0.33461	0.68808	0.44159	0.79999	-0.17069
ADAM22	0.032087	14451	0.37736	-0.26072	0.66556	-0.10153	0.72426	-0.30198	0.5357	0.5401	0.95703	-0.55639	0.31604	10881	0.82964	-0.61403	0.89631	-0.28797			0.59237	0.1797			0.35916	0.83651	0.70206	-0.21032	0.12349	13605	0.89082	-10103
ADAM23	0.45587	0.11169	0.99125	-0.85113	0.19917	12797	0.88013	-0.091673	0.051866	15788	0.47352	0.081131	0.84117	-0.75304	0.70894	0.54035	0.70327	0.36932	0.045865	4425	0.5348	-0.28911	0.54132	0.58804	0.82391	-15878	0.49069	0.56377	0.57347	0.50388	0.96807	-0.9918
ADAM28	0.65123	-0.58789	0.75432	0.36526	0.84008	-0.7517	0.97276	-0.20115	0.9311	0.1494	0.77219	-0.56636	0.51725	0.70362	0.61337	0.059301	0.36997	-0.53732			0.94583	-0.18639	0.67547	-10376	0.75844	-0.97067	0.72208	-10586	0.95591	-10037	0.30538	11281
ADAM29	0.16305	15539	0.33155	0.23075	0.20919	12001	0.76352	-0.48921	0.4339	0.90089	0.86976	-0.79852	0.54084	0.282	0.96049	-0.1403	0.18405	0.96685			0.59731	-15958	0.35708	11773	0.47192	0.45475	0.36267	0.95813	0.97273	-17121	0.96423	-23863
ADAM30	0.94414	-13191	0.56763	-0.38928	0.29221	0.41404	0.36674	-0.17126	0.86211	-0.80605	0.70375	0.14791	0.61702	-0.59195	0.40867	0.82102	0.34002	-0.14657	0.85164	0.24891	0.58235	-0.34419	0.63433	0.23523	0.84365	-1199	0.12338	-10679	0.88671	-1504
ADAM32	0.022854	17601	0.55441	0.16689	0.12389	0.34088	0.78287	0.1824	0.2279	12585	0.31844	0.849	0.66564	-0.16808	0.64349	-0.37717	0.44101	0.27492	0.958	-10899	0.26268	-15502			0.36558	0.58259	0.34767	0.58014	0.96046	-2242	0.38996	0.76961
ADAM33	0.87567	-0.97743	0.81846	-0.21964			0.90396	-0.22801	0.96357	-0.60307	0.12665	0.22028	0.60557	-0.055854	0.47194	0.36335	0.74653	0.17829			0.58646	-0.88094	0.080757	37843	0.8495	-13563	0.039958	12696	0.25942	0.40222	0.29181	13558
ADAM7	0.52249	0.51531	0.5219	0.25368	0.65212	-0.4703	0.42426	-0.093633	0.079145	1982	0.72884	0.25542	0.51039	0.22163	0.88007	-0.038181	0.21365	-0.60078	0.56921	1372	0.89578	-0.47556	0.31843	14544	0.72322	0.42046	0.98676	-26151	0.85931	-15653	0.20172	18063
ADAM8	0.56709	0.024675	0.73753	-0.10748	0.39605	-0.024644	0.46358	0.44209	0.089544	1966	0.55229	0.1918	0.7824	-0.77064	0.94732	-0.29141	0.38419	-10093	0.43431	1128	0.91736	-0.54582	0.06581	40146	0.64106	0.12961	0.50163	0.47223	0.47853	0.46335	0.074089	25062
ADAM9	0.9856	-0.45567	0.37122	0.05325	0.65141	0.30026	0.62613	-0.36429	0.69864	-0.37938	0.45641	0.64315	0.80788	0.45126	0.49045	0.2924	0.36729	0.2953	0.65648	0.16008	0.70073	-0.57999	0.65438	0.15988	0.74143	-0.29146	0.90049	-0.35509	0.12923	0.48448	0.67306	-0.72682
ADAMDEC1	0.31587	0.58399	0.36824	0.18009	0.23409	12445	0.66115	0.34254	0.10832	0.95935	0.45189	0.66526	0.50995	0.83572	0.22581	1016	0.077109	13056			0.88152	-0.33839	0.45036	1166	0.75867	-11385	0.18249	12975	0.65849	-10921	0.92412	-25443
ADAMTS1	0.92719	-0.52949	0.28035	0.62716	0.75312	0.31784	0.12312	11617	0.078648	17785	0.13177	12686	0.24644	0.8339	0.65369	0.023656	0.20596	0.82192			0.88429	-11256			0.92435	-18002	0.57578	-0.016251	0.42564	0.44405	0.6733	-0.3872
ADAMTS10	0.79987	0.1377	0.055105	20675	0.31564	0.97068	0.04339	14635	0.78751	-0.18138	0.10394	15216	0.66574	0.3563	0.43538	0.62373	0.67228	-0.88855	0.22675	28913	0.29126	0.97044	0.86765	-21943	0.51733	-0.86737	0.86401	-20921	0.76372	-0.28021	0.60766	-0.42526
ADAMTS12	0.68567	0.20234	0.77402	-0.28978			0.61557	-0.47801	0.70014	-0.012472	0.68246	0.44543	0.64122	-0.027851	0.37272	0.62991	0.54693	-0.96726			0.32786	1022	0.68728	0.042839	0.81429	-10631	0.65065	-16303	0.032137	27511	0.50898	0.11418
ADAMTS13	0.60203	0.64331	0.21485	-0.42412	0.89552	-0.93894	0.39327	-11372	0.95223	-0.13142	0.54573	0.60513	0.50094	0.36589	0.77885	-0.5133	0.82967	-21602	0.40938	17322	0.71516	-0.62671			0.15528	15361	0.25678	11278	0.72153	0.59496	0.80766	-13137
ADAMTS14	0.95899	-0.75579	0.80959	0.43404	0.93218	0.42461	0.078816	0.72544	0.20401	0.37277	0.46567	0.7021	0.096892	17942	0.13692	10761	0.91057	-1691	0.3015	24102	0.48078	-0.71044	0.9728	-2452	0.95689	-20849	0.41819	0.67763	0.84902	0.037206	0.92407	-20143
ADAMTS15	0.84427	-0.13974	0.048483	11678	0.67514	-0.089673	0.70187	-0.0070198	0.24977	14274	0.41003	0.0041413	0.67247	0.71928	0.58487	0.78414	0.20903	0.46813	0.18145	31396	0.023754	23452	0.81528	-0.31096	0.15883	11477	0.53034	-0.49303	0.72185	-0.87279	0.70365	-0.9747
ADAMTS16	0.65831	-0.50697	0.91441	-11031	0.98873	-12003	0.9299	-0.62151	0.22468	0.61527	0.060494	11934	0.20099	14313	0.4903	0.33387	0.72226	-0.12423	0.45993	15836	0.36313	0.32201	0.54615	0.50599	0.57582	0.15853	0.65088	-14127	0.38861	-16599	0.67903	-0.66234
ADAMTS17	0.46444	0.26397	0.12806	15397	0.78973	-0.43108	0.82896	-0.79803	0.052	27953	0.34163	11436	0.83918	-0.5852	0.30227	12374	0.80107	-0.7067			0.8636	-0.88103	0.69921	-0.9538	0.090774	20927	0.092412	15321	0.39435	0.29367
ADAMTS18	0.60954	0.35748	0.72481	0.17625	0.042053	19835	0.82871	0.0042431	0.13812	20347	0.2474	10561	0.47508	0.6439	0.19015	14586	0.1711	0.24953			0.073529	20935	0.5357	0.074624	0.55574	-0.37263			0.29909	0.8683	0.85242	-14608
ADAMTS19	0.99298	-0.51384	0.21043	0.50303	0.62242	-0.085515	0.53662	0.033354	0.14687	13774	0.24997	0.99664	0.78233	0.76492	0.0058744	0.95573	0.97771	-20582	0.90284	-0.76019	0.35222	-0.36838	0.086392	24873	0.28747	-12937	0.082317	16355	0.54587	0.016002	0.7827	-14709
ADAMTS2	0.17715	14946	0.4683	-0.0014269	0.27227	0.61941	0.47462	-0.65519			0.72816	-0.23659	0.33284	1194	0.57386	0.061233	0.39648	0.56681	0.47319	13142	0.33368	-0.18524	0.62359	0.70346	0.68256	-10519	0.069309	19802	0.50315	-0.038471	0.86269	-0.7392
ADAMTS20	0.22819	1947-01-01	0.082669	16435	0.13159	0.56139	0.064074	1192	0.85892	-0.6157	0.10313	0.87736	0.16135	0.61606	0.053948	0.35909	0.9337	-24216	0.18017	23742	0.30874	0.92421			0.41591	-0.27538	0.0087932	1119	0.89436	-17143	0.57788	0.21795
ADAMTS3	0.68114	0.75752	0.71498	-0.54995	0.48419	0.53507	0.10878	-11001	0.91103	-11589	0.35976	-0.88379	0.2066	13692	0.47914	0.23877	0.37884	0.049578	0.42358	16454	0.15508	14772	0.085903	33202	0.1538	-0.13448	0.57671	-0.83097	0.96371	-0.67466	0.75371	-1271
ADAMTS4	0.60125	10576	0.81985	-0.39375	0.46326	0.75329	0.98191	-0.53182	0.87779	-0.32715	0.59444	-1141	0.21846	13536	0.75978	0.045651	0.46599	0.45387	0.40584	11881	0.48894	0.21191	0.12131	32619	0.44198	0.54009	0.35811	0.081874	0.43461	-15531	0.90612	-23611
ADAMTS5	0.25931	13084	0.31166	0.12077	0.42996	0.035311	0.83562	-0.44407	0.03274	25165	0.20746	10344	0.81637	0.33134	0.5626	0.11474	0.57658	0.36336			0.87785	-0.14946	0.65898	-0.64645	0.75844	-0.48213	0.081181	-0.93382	0.20209	-0.17712	0.031079	31421
ADAMTS6	0.49473	-10385	0.53366	0.081603	0.66628	-0.3122	0.56579	-10607	0.98804	-14289	0.16283	0.86658	0.83425	-0.34904	0.49194	-0.16113	0.74331	-10978			0.010281	10241			0.16067	11669	0.59032	-0.036779	0.76929	-0.59205	0.43865	11389
ADAMTS7	0.99588	-1359	0.16819	0.95978	0.74839	-0.29817	0.94082	-0.19723	0.58488	0.40347	0.28974	11447	0.14548	16835	0.43993	0.68551	0.85124	-0.63632	0.78138	-0.75602	0.29893	0.87935	0.57239	0.69986	0.40366	0.67058	0.99097	-13799	0.73625	-13192	0.35713	11856
ADAMTS8	0.5845	0.85894	0.25219	0.82461	0.24714	0.67664	0.90422	-0.98132	0.5535	0.65257	0.95453	-0.86697	0.056811	16996	0.072874	13976	0.19601	-0.8776	0.71898	11368	0.99252	-2113	0.066967	39817	0.40594	0.1145	0.57632	-13099	0.41577	0.065179	0.94656	-20448
ADAMTS9	0.51333	0.30844	0.032132	17767	0.07025	13341	0.33385	0.41644	0.0089152	29001	0.74637	0.14609	0.64694	0.28637	0.61853	0.19264	0.57118	-0.12117	0.86735	-15788	0.36557	0.43656			0.81683	0.28835	0.66731	-0.51252	0.068349	26651
ADAMTSL1	0.94613	-0.67726	0.087907	0.5642	0.20663	0.94288	0.25722	0.75543	0.81854	0.36761	0.34345	0.91665	0.4233	0.62881	0.35528	0.79779	0.48997	-11565	0.69514	-0.4853	0.55542	0.28923			0.2118	0.69489	0.71879	-0.7088	0.68066	-0.96985	0.27124	-19585
ADAMTSL2	0.86591	-0.084745	0.22979	0.6088	0.0012915	25939	0.52076	-0.15013	0.64278	0.51393	0.1672	12273	0.14444	16353	0.66915	0.32005	0.83388	-0.85174	0.35975	20503	0.59838	0.016754			0.041654	0.90481	0.72019	-13001	0.11913	23188	0.55774	0.8112
ADAMTSL3	0.23509	0.47105	0.87035	-11856	0.7325	-0.36509	0.91266	-0.20413			0.78742	0.024283	0.043257	24875	0.8964	-0.1032	0.57863	0.39449	0.59834	14225	0.41166	-0.75912	0.51604	0.83001	0.12122	17981	0.72844	0.25812	0.063929	19004	0.1974	0.78246
ADAMTSL4	0.97236	0.14702	0.27364	-0.47284	0.19218	0.65384	0.1359	0.71378	0.91308	-10939	0.42937	-0.1497	0.19523	10852	0.30382	-0.41629	0.2334	11107	0.32109	23164	0.9289	-15408	0.0045317	56922	0.76387	-18565	0.84666	-11044	0.47223	-0.14678	0.77589	0.020929
ADAMTSL5	0.57715	0.12923	0.47815	0.52312	0.8978	-0.88173	0.47158	0.18908	0.20191	1367	0.29982	11117	0.012311	28591	0.77834	-0.19074	0.16025	-1089	0.75694	0.6472	0.60479	-0.39654			0.59129	0.60517	0.6943	0.14757	0.38482	0.50428	0.53657	-0.041646
ADAP1	0.2073	13003	0.19324	0.9153	0.30888	0.53605	0.26742	0.77883	0.81132	0.56966	0.35845	-0.007728	0.56824	0.26438	0.26692	-0.0014383	0.092601	15853	0.58285	0.6911	0.49129	-13328	0.19848	24627	0.79411	-15156	0.5123	0.31168	0.69761	0.57265	0.28539	0.60591
ADAP2	0.04248	16136	0.41165	0.17053	0.84282	-0.6779	0.81252	0.21969	0.54015	0.66022	0.90005	-0.327	0.060582	13911	0.5836	0.1916	0.11085	10048	0.30292	23097	0.80144	-0.3373	0.98927	-38158	0.32455	0.73275	0.91358	-10116	0.56668	0.24267	0.47354	0.7845
ADAR	0.60806	0.24095	0.78099	-0.47016	0.95034	-0.66583	0.71459	-0.59926	0.0070351	37959	0.53028	0.33888	0.2531	13856	0.45071	-0.17846	0.42019	0.17209			0.30632	-0.074364	0.2582	19915	0.91945	-15299	0.54978	-0.24985	0.79861	-10318	0.29183	13576
ADARB1	0.017808	29074	0.4968	-0.03995	0.048066	18436	0.69496	0.40266	0.16314	0.84502	0.25694	11064	0.69039	-0.037748	0.35051	-0.0045424	0.088769	0.083066			0.021706	25544	0.15451	26408	0.32569	0.85741	0.80799	-24454	0.67699	-0.12664	0.65214	0.4481
ADARB2	0.77582	-0.44423	0.98508	-0.76957	0.56201	-0.22127	0.70175	0.46793	0.20637	0.58178	0.2823	0.69505	0.65132	-0.27644	0.60218	-0.70844	0.8192	-0.5407	0.21347	30701	0.33206	-0.93301	0.38087	13752	0.99477	-27809	0.066442	13906	0.51347	0.37412
ADAT1	0.95449	-0.21193	0.75158	0.031089	0.43869	0.22556	0.15315	0.98967	0.47421	0.51664			0.1343	1465	0.80529	-0.19722	0.52935	-15182	0.90425	-0.17504	0.72515	-0.86004	0.64616	-0.61984	0.41766	0.85901	0.60118	0.53398	0.93212	-0.83806	0.22813	16234
ADAT2	0.13344	0.7849	0.048861	14046	0.41449	0.52086	0.92718	-0.81045	0.82935	-0.41384	0.39697	0.75556			0.43982	0.22989	0.78284	0.2929			0.83108	-0.98817	0.16937	-10326	0.13038	18367	0.81888	-18104	0.23798	10239	0.55109	0.020834
ADAT3	0.45863	0.72759	0.73681	-0.077886	0.98935	-0.59525	0.73052	0.022974	0.26899	0.5375	0.86313	0.3199	0.072115	20737	0.5728	-0.34112	0.37373	-0.30806	0.024182	4822	0.29757	0.39032			0.6221	-0.71027	0.31889	0.88709	0.84974	-21165	0.92182	-17737
ADCK1	0.61448	-0.89748	0.17556	0.97415	0.52329	0.69252	0.89119	0.48875	0.70384	0.92678	0.55467	0.61192	0.070308	16264	0.15861	14704	0.75748	-10191	0.80628	-0.88493	0.25793	10471	0.76039	-13837	0.81175	0.24494	0.94594	-17348	0.077072	24172	0.16198	18702
ADCK2	0.60192	0.026884	0.37056	-0.24595	0.46313	-0.081295	0.9499	-0.91864	0.63299	0.47798	0.55936	0.45221	0.35038	0.75807	0.98949	-0.36155	0.19507	0.79785	0.57573	0.64453	0.92308	-19097	0.54753	-0.10068	0.4032	0.20726	0.28394	0.55768	0.47307	-18485	0.11821	1221
ADCK3	0.62198	-0.15024	0.50799	0.251	0.74658	-0.016889	0.87543	-0.74159	0.71095	-0.76321	0.21525	12959	0.082616	15429	0.4849	-0.39694	0.74884	-0.99048	0.2054	23912	0.73572	-13658	0.81489	-17636	0.63082	-0.36164	0.47174	-0.38421	0.94467	-23839	0.65326	-0.65406
ADCK4	0.82665	-0.51929	0.60331	-10324	0.55953	0.4518	0.23844	0.41292	0.96692	-1074	0.26517	0.82479	0.9607	-11574	0.28762	0.68556	0.96214	-13456	0.43068	21715	0.37429	0.2743	0.57259	0.92282	0.65023	-0.31594	0.8522	-0.7499	0.66893	-28149	0.78397	-0.5515
ADCK5	0.84618	-0.54797	0.42493	0.3544	0.048518	10229	0.47537	-0.81249	0.80885	-19802	0.88487	0.32019	0.91389	-0.67771	0.78422	-0.25052	0.7043	-0.2512	0.2774	21846	0.55419	-11253	0.16888	26465	0.55046	0.049067	0.94397	-0.58722	0.49102	-0.66158	0.73054	0.16233
ADCY1	0.77459	-0.37814	0.88563	-0.052396	0.52654	0.40288	0.097422	0.53544	0.6919	0.55683	0.93875	-0.68683	0.027937	26333	0.80038	-0.73643	0.74267	-0.20961	0.71966	-0.23033	0.37781	-0.3639	0.17371	27248	0.10349	16047	0.35825	0.21152	0.55321	0.010489	0.16678	-0.17841
ADCY10	0.90087	-0.075383	0.71188	-0.64414	0.33832	0.29479	0.55976	0.49902	0.34159	0.65422	0.066352	15429	0.65379	0.62041	0.97096	-15743	0.37797	0.45446			0.39813	0.023606			0.73225	-0.52489	0.29867	0.53184	0.090732	23687	0.60585	0.013144
ADCY2	0.83402	0.43763	0.13722	0.65313	0.86714	-0.82428	0.70864	0.074748	0.45333	0.8753	0.36446	0.77577	0.36128	0.98046	0.60525	-0.92429	0.86613	-10506	0.35295	14064	0.0014289	27319	0.35734	0.87741	0.10078	16701	0.28628	10125	0.51752	-0.83302	0.82778	-0.096147
ADCY3	0.84473	-0.10295	0.8716	-0.23343	0.89387	-0.92348	0.57766	0.42847	0.48687	0.42383	0.10748	-0.35106	0.65371	-0.26079	0.49958	0.78745	0.75753	0.30241			0.35811	0.89354	0.85459	-0.37183	0.36264	-0.52516	0.1451	-0.38154	0.43266	0.72171	0.39578	-0.80912
ADCY4	0.98302	-18013	0.99923	-1085	0.92696	-0.45441	0.21858	-0.08509	0.80675	-0.030719	0.43803	0.87197	0.58962	0.15319	0.91033	-0.13153					0.15812	15148			0.41286	0.74613	0.34571	0.64302	0.019821	-0.9355	0.65294	0.59646
ADCY5			0.81774	-0.69571	0.38245	-0.0074363	0.82277	-0.21369	0.37958	-0.0083052	0.29981	12618	0.56757	0.62182	0.2217	0.99266	0.9472	-10618			0.43922	-0.92834	0.49089	0.35105	0.9714	-20511	0.45862	-15124	0.91905	-22982	0.76771	-0.25191
ADCY6	0.76101	0.13379	0.74539	-0.9132	0.89293	-0.16498	0.68216	0.44601	0.55765	-0.12214	0.34363	0.14423	0.20772	0.55237	0.23002	10854	0.80516	-0.5464	0.048541	34063	0.40431	0.58882	0.52132	0.92659	0.0032035	31188	0.94777	-0.45957	0.81731	-0.4867
ADCY7	0.44123	0.59304	0.16879	0.69118	0.90957	-0.41225	0.82205	0.26937	0.94711	-0.67992	0.87778	-0.01731	0.30602	0.9386	0.39296	0.16302	0.78348	-10599	0.52616	0.9549	0.86894	-0.8605	0.51453	-0.82604	0.53774	-0.4377	0.36696	0.16983	0.55287	-0.26353	0.68691	-26729
ADCY8	0.27056	-0.15459	0.11497	0.9753	0.011832	34057	0.54856	0.26829	0.25761	0.90963	0.75903	-0.10076	0.53373	0.35055	0.26556	11522	0.53336	-0.86263	0.12728	36249	0.95708	-0.91591			0.0093146	22103	0.46548	-0.38871	0.99198	-22701
ADCY9	0.69361	0.2099	0.86084	-0.24196	0.099455	10759	0.55108	0.77827	0.61615	-0.92028	0.16705	10717	0.53787	0.041344	0.89677	0.021755	0.92396	-0.88959			0.044803	0.79989	0.44001	0.52425	0.43635	0.58384	0.72252	0.33859	0.13114	-0.71175	0.019109	30228
ADCYAP1			0.054849	15963	0.046175	22529	0.1234	0.92311	0.93669	-0.81038	0.29114	11251	0.08915	21801	0.4959	0.39899	0.52604	-1169	0.67121	0.070522	0.60603	0.25857	0.76859	-14372	0.71042	0.68241	0.18471	13447	0.46578	-0.70522	0.25331	-0.67003
ADCYAP1R1	0.51268	0.29258	0.9462	-0.9275	0.0088514	22724	0.61951	0.26014			0.17082	13163			0.038867	20018	0.42925	0.23616	0.78345	-0.78407	0.33229	10856	0.75095	-13148			0.54926	-0.46369	0.6213	-0.67737
ADD1	0.14947	1449	0.66485	0.34554	0.87222	-0.050914	0.17391	0.81077	0.26758	0.84791	0.22431	0.50018	0.34766	0.89077	0.64971	0.094242	0.017703	21145	0.57072	11732	0.10021	0.95299	0.53881	0.039695	0.92616	-0.82651	0.78378	-12555	0.33833	-17567	0.13474	22288
ADD2	0.58406	-0.1064	0.89355	0.054697	0.55639	0.00077302	0.92193	-0.082658	0.97125	-0.95064	0.74528	0.16227	0.11744	20228	0.73657	-0.21129	0.18622	12476	0.89704	-19255	0.58165	-0.16754	0.91474	-26005	0.55195	0.57095	0.58601	-0.25059	0.70286	-0.20909	0.30235	-19093
ADD3	0.95458	-0.10165	0.96662	-0.13053	0.35618	-0.018365	0.37008	-0.81994	0.66845	0.98769	0.56515	0.042067	0.62689	-0.15378	0.70833	0.35918	0.35783	0.3522			0.63946	-0.71204			0.22896	-17033	0.30758	0.9264	0.50375	0.3358	0.02688	19871
ADGB	0.90008	-0.29885	0.44855	0.5292	0.50486	0.89908	0.73174	0.17346	0.64783	0.33094	0.86029	-0.25331	0.23551	14945	0.10821	12913	0.80627	-0.23809	0.0049351	51122	0.60426	0.49285	0.5307	10388	0.26548	0.80078	0.15349	13378	0.43329	0.68966	0.69361	-0.91704
ADH1A	0.41087	0.72067	0.93456	-0.74745	0.51072	0.43321	0.88341	-0.36393	0.29546	1112	0.24994	11706	0.598	-0.17405	0.94359	-13161	0.75805	-0.40961	0.19115	17886	0.54122	0.17869	0.97736	-3409	0.38036	-0.54248	0.33707	0.61286	0.32394	0.87495	0.012763	40553
ADH1B	0.75199	-0.45586	0.94506	-1314	0.44982	0.58668	0.92715	-0.47953	0.46872	0.48741	0.68015	0.67385	0.46536	0.65829	0.14631	10912	0.3503	0.65399	0.18779	32728	0.56535	0.54952	0.22386	22415	0.14089	17394	0.24283	11677			0.35031	14395
ADH1C	0.5894	-0.0047186	0.085245	0.77799	0.52523	-0.13304	0.33095	0.86608	0.95721	-0.82713	0.070706	0.94676	0.40987	0.7444	0.62495	0.1474	0.7867	-0.1317	0.15848	33475	0.80401	-17339			0.81164	-0.53594	0.54776	0.55035	0.95136	-29549	0.21274	18102
ADH4	0.43177	0.7974	0.92086	0.065787	0.98236	-0.99876	0.47061	-0.057321	0.41849	0.21416	0.64705	-0.36474	0.50526	-0.10017	0.66865	0.085241	0.68412	0.12647	0.51483	11005	0.70097	0.51139	0.090098	21682	0.83355	0.13694	0.70183	0.0098931	0.86017	0.088364	0.094234	21773
ADH5	0.15853	12166	0.96278	-0.77741	0.30879	-0.15469	0.67091	-10221	0.52361	0.69412	0.16761	-0.60617	0.75093	0.20927	0.57619	-0.26391	0.95528	-0.32628	0.53446	16785	0.11624	12548	0.83561	-19248	0.56297	-0.40511	0.41781	0.78721	0.62273	-0.44239	0.28007	2022-01-01
ADH6	0.15565	13953	0.12618	0.23133	0.6101	-0.19513	0.30161	-0.11274	0.61398	0.73201	0.39591	0.041302	0.72713	0.4942	0.014658	17929	0.15605	-0.17757	0.45632	15088	0.45043	-0.38604	0.94335	-17205	0.04206	1253	0.32378	0.78828	0.49792	-0.016011
ADH7	0.33606	11733	0.2451	0.7324	0.38562	0.78061	0.60646	-0.47079	0.97889	-1755	0.1089	-0.043181	0.071204	11879	0.7107	0.43659	0.69593	-0.011155	0.39	18468	0.39071	0.037623	0.023278	49344	0.82732	-0.070294	0.056554	-0.34717	0.023799	19281	0.55102	0.062822
ADHFE1	0.96392	-15037	0.27156	0.83733	0.86616	0.17768	0.75502	0.14615	0.47884	0.48941	0.081651	0.52029	0.39142	10942	0.3581	0.68629	0.49624	0.12507			0.57022	-0.44821	0.55528	-0.058282	0.33517	-0.12903	0.97848	-23688	0.5554	-0.029217	0.86584	-20666
ADI1	0.31835	-0.052241	0.30369	0.67881	0.61448	0.51699	0.089901	0.80149	0.37636	0.28737	0.055785	22712	0.8635	-0.091798	0.98373	-0.46147	0.62569	-12843	0.29072	24827	0.25655	0.60757			0.81194	-0.81682	0.027886	25224	0.18214	13062	0.63138	0.12679
ADIG	0.24014	0.73569	0.72974	-0.84151	0.50188	0.56965	0.45582	-10945	0.68031	-0.12232	0.50398	-0.38784	0.3941	0.60435	0.21963	0.50502	0.76471	0.055815	0.70688	-0.95779	0.91899	-14985	0.15602	28394	0.29016	0.84477	0.9049	-15104	0.15693	15109	0.067995	29118
ADIPOQ	0.0023269	24708	0.38426	-0.14499	0.88335	-0.47109	0.9091	-0.43268	0.4237	10661	0.45018	0.76711	0.39154	0.6327	0.27734	0.6084	0.57444	0.26392	0.84645	-1379	0.75607	0.29167			0.60684	-0.61389	0.0073814	21397	0.88324	-0.98143	0.46865	0.32308
ADIPOR1	0.9411	-0.55296	0.6147	0.46625	0.47385	-0.025608	0.97805	-0.53554	0.57824	0.18678	0.9807	-11277	0.91866	-0.82653	0.85444	0.0046612	0.23702	-0.028369	0.19791	29925	0.4842	-0.92401	0.83644	-0.90511	0.98794	-34447			0.25625	13633	0.52736	0.020963
ADIPOR2	0.73845	-0.071179	0.72612	-0.40633	0.7414	0.037919	0.85524	0.1653	0.53721	0.014486	0.79148	0.53953	0.66527	-0.17527	0.53336	0.16641	0.55692	-12437			0.79501	-0.85809	0.69618	-0.93607	0.29181	0.91172	0.074335	0.80853	0.092403	25422	0.60763	0.026949
ADK	0.74443	-0.91562	0.83141	-0.90705	0.98515	-1037	0.53191	0.074117	0.9678	-21008	0.93531	-0.33673	0.2849	-0.34706	0.91375	0.30277	0.83624	-0.349	0.66936	0.67591	0.97811	-11637	0.30629	14546	0.75243	-0.99945	0.96768	-1305	0.26198	0.72575	0.67705	-0.046946
ADM	0.17671	-0.10533	0.60732	0.060639	0.11916	12942	0.29935	0.29132	0.013415	22244	0.86852	-0.69324	0.067463	15165	0.22585	0.97386	0.26923	0.060393			0.90703	-1981	0.16373	16214	0.08512	0.83516	0.56726	0.20911	0.030728	16066	0.13685	14848
ADM2	0.31919	0.58866	0.64112	0.62024	0.33175	0.27167	0.88327	-0.52223	0.21758	14987	0.96871	-0.34496	0.75895	0.43374	0.82311	0.28852	0.83619	-15001	0.62148	0.49652	0.18554	0.35544	0.65669	-0.037258	0.36799	0.29407	0.018812	17299	0.15239	18889	0.79173	-15323
ADNP	0.5532	0.1022	0.37826	-0.17241	0.28931	10904	0.40324	-0.50835	0.70201	0.12456	0.71831	0.57714	0.93682	-0.67693	0.92861	-0.49652	0.17506	0.63625	0.046063	44062	0.78347	-0.32402	0.47144	0.47897	0.98733	-22811	0.1956	12537	0.86432	-19396	0.41108	0.63148
ADNP2			0.50459	0.49531	0.78024	-0.49785	0.95451	-0.49354	0.0072716	40002	0.6792	-0.1767	0.55952	0.24619	0.070349	13493	0.48245	-0.0079893	0.20281	24314	0.52183	0.12443	0.25856	2041	0.22131	13205	0.038493	1652	0.94746	-18937	0.35845	0.95602
ADO	0.099754	0.80243	0.87561	-0.10074	0.71289	0.18027	0.65873	0.031434	0.36229	0.94992	0.27901	10542	0.13647	0.57744	0.11691	10819	0.056064	-0.45594	0.80537	-0.92227	0.20245	13492	0.52308	-0.16107	0.82104	-0.5841	0.087179	20691	0.50812	-0.64353	0.29451	0.34458
ADORA1	0.9389	-0.75299	0.81856	0.063963	0.50548	0.13553	0.76486	-0.48623	0.44121	-0.33112	0.81914	-0.72413	0.96713	-1.01	0.86111	0.084429	0.98348	-25206	0.9776	-2223	0.37752	0.39488	0.951	-14509	0.27457	10299	0.70696	-0.39835	0.48883	-0.92846	0.21642	-0.065651
ADORA2A	0.40219	0.064043	0.48122	-0.2035	0.48468	0.6075	0.13536	0.56729	0.63646	-0.93494	0.65501	-0.58504	0.83492	-10845	0.092315	10304	0.68274	-0.21843	0.97708	-16723	0.8283	-14471	0.72362	-11258	0.25119	0.91832	0.65614	-0.35408	0.67582	-17632	0.61843	-0.85136
ADORA2B	0.94754	-0.92239	0.84555	-0.11999	0.84767	-0.35113	0.79485	-0.75285	0.76661	-0.66462	0.66441	-0.066354	0.92615	-0.34888	0.98948	-0.6023	0.96919	-19682	0.52548	0.96696	0.39691	0.53209	0.84659	-0.44215	0.74386	-0.84024	0.58105	0.06911	0.48849	-0.02391	0.4044	0.25042
ADORA3	0.7893	-0.19634	0.096414	10871	0.59915	-0.45347	0.38299	0.44919	0.37554	0.49024	0.38063	0.1313	0.7212	-0.43836	0.65782	-0.84024	0.19792	0.75305	0.84199	-0.83922	0.7977	0.19549	0.96001	-30496	0.6274	-0.80076	0.63375	0.23497	0.58527	0.059616	0.83988	-0.92186
ADPGK	0.92918	-0.6878	0.064517	0.24918	0.74719	0.10575	0.81432	0.21849			0.072815	12127	0.40748	0.80462	0.06608	14373	0.18748	0.45908	0.55067	0.17067	0.48439	0.070354	0.87512	-11994	0.67436	-13153	0.1529	0.19662	0.92232	-21648
ADPRH	0.84784	-0.95814	0.68355	-0.51712	0.68819	-0.80096	0.96078	0.076236	0.25611	0.4358	0.48635	0.094359	0.21051	0.15286	0.11304	-0.085178	0.39095	0.51093	0.14506	17277	0.088856	12136	0.72894	0.024502	0.86361	-0.28717	0.61745	0.20071	0.43372	0.61118	0.51048	-0.090998
ADPRHL1	0.026351	0.44731	0.59016	0.22189	0.91308	-10105	0.84414	-0.14648	0.55768	0.89434	0.59944	-0.0085857	0.94211	-0.76544	0.37668	-0.35343	0.97898	-0.78808	0.44133	15273	0.70012	0.25979	0.84509	-19917	0.95036	-0.86573	0.87278	-28902	0.98822	-17818	0.225	-0.33224
ADPRHL2	0.01327	25489	0.28161	-0.98219	0.29746	0.86379	0.15107	0.91283	0.5334	-0.47746	0.91957	-0.051667	0.3247	0.93751	0.46087	-0.064797	0.17989	10953	0.2397	23989	0.85822	-2032	0.53574	0.065625	0.36676	-13505	0.70439	0.015188	0.87418	-10945	0.13529	0.47141
ADPRM	0.90825	-0.25221	0.72879	0.0070521	0.31803	-0.21115	0.65178	-0.024046	0.55392	0.3312	0.73864	0.29291	0.27993	0.29493	0.92936	-0.33255	0.69365	-0.27304			0.8166	-0.26255	0.75457	-0.77922	0.86099	-11248	0.074188	14078	0.36497	0.87836	0.15316	18971
ADRA1A	0.65644	0.63675	0.52158	-0.13179	0.18905	-0.73509	0.51274	-0.83736	0.3273	0.13342	0.88678	0.17823	0.40194	-0.35426	0.36612	0.49362	0.10452	1194	0.42045	1563	0.50356	0.28681	0.39626	1358	0.75434	-11212	0.21897	-1889	0.58356	-0.27268	0.88731	-10989
ADRA1B	0.72488	-0.082177	0.25522	0.50256	0.32323	-0.63525	0.86299	-0.70446	0.38398	0.92675	0.47775	0.40412	0.96608	-0.31247	0.91279	-0.2485	0.075854	0.75212	0.40128	16715	0.67566	0.41327	0.96969	-11593	0.35772	0.58864	0.95164	-1729	0.2208	-16891	0.93482	-12128
ADRA1D	0.098715	12072	0.48155	-0.21856	0.23846	0.88619	0.38097	-0.68859	0.78506	0.28185	0.91	-11257	0.72007	0.17829	0.96268	-0.56411	0.32318	0.40124	0.77076	-22172	0.33485	0.89721			0.91195	-0.30004	0.82915	-0.070214	0.83479	-16157	0.033044	13125
ADRA2A	0.51105	0.22535	0.72037	-0.067119	0.41625	0.65552	0.98274	-10096	0.8526	-0.023011	0.81241	-0.1379	0.31658	0.76596	0.81598	-10324	0.33104	0.60367	0.89793	-0.46664	0.93795	-0.89584	0.84837	0.46261	0.56471	-0.026741	0.62116	0.44059	0.45706	0.58268	0.96287	-28807
ADRA2B	0.83151	-0.90281	0.8832	-0.63218	0.34101	0.17179	0.52775	0.2713	0.060955	13733	0.8444	0.2387	0.30532	0.91616	0.79862	0.18202	0.87577	-0.94329	0.53179	14656	0.60468	-14505	0.6462	-0.97251	0.66595	-0.58445	0.96119	-10364	0.82427	-21057	0.58132	-18009
ADRA2C	0.65584	-0.96615	0.15581	-0.38895	0.9041	-0.59629	0.75843	-0.53409	0.41855	0.033895	0.79205	-0.26006	0.83481	-0.9009	0.68552	-0.77452	0.85813	-0.33865	0.97477	-30899	0.70644	-0.29312	0.99242	-20012	0.63228	0.20195	0.46273	0.62599	0.47643	0.60554	0.97237	-10797
ADRB1	0.31387	0.85352	0.15799	0.72499	0.74679	-0.65676	0.50573	0.48081	0.4216	0.79935	0.28994	0.09314	0.6057	0.036652	0.61968	-0.32099	0.14557	11114	0.73819	-0.60628	0.55731	-15408	0.26685	18864	0.20533	-0.41979	0.50014	-0.23723	0.42944	-10281	0.62683	0.1155
ADRB2	0.79948	0.20521	0.24077	0.53348	0.55878	-0.10813	0.20219	-0.57905	0.75124	0.14582	0.093085	-0.52604	0.75135	0.3582	0.94433	-0.19228	0.96354	-10531	0.7772	0.70309	0.06375	14407	0.58346	0.78542	0.13922	10992	0.73876	-0.21211	0.87025	0.027138	0.42733	0.81756
ADRB3	0.63536	0.36038	0.43551	0.55154	0.66525	-0.49222	0.7554	0.056608	0.95995	-14012	0.79981	-0.19158	0.61644	0.57237	0.28393	-0.0049618	0.88017	-29679	0.57688	0.105	0.82737	-0.94797	0.27384	16868	0.93294	-13936	0.44319	0.13698	0.36673	0.86175	0.88745	-0.404
ADRBK1	0.58808	0.72066	0.95753	-0.60897	0.81908	-0.71003	0.69118	-0.34883	0.14333	10614	0.67275	0.13296	0.77058	0.38562	0.77083	0.37987	0.72727	-13678	0.91052	-0.86971	0.44863	-1113			0.76157	0.2399	0.73439	-0.74083	0.65494	0.080483	0.9236	-0.22347
ADRBK2	0.53088	-0.26	0.53643	0.13863	0.34309	0.39767	0.0273	14836	0.23914	-0.20673	0.50991	0.35674	0.50196	-0.46437	0.09935	0.88996	0.88508	-0.24484	0.64121	-23517	0.88175	-1258	0.6848	-0.6052	0.75201	-0.17486	0.64743	-0.3209	0.87184	-17506	0.48718	0.5645
ADRM1	0.20526	11735	0.086306	13663	0.40214	0.07607	0.88949	0.13854	0.75906	-0.4861	0.72002	-0.29024	0.64194	0.046003	0.17697	0.32537	0.10239	0.68005	0.50761	11843	0.52743	0.01321	0.4816	0.43179	0.20081	11151	0.39109	0.078229	0.67491	0.49605	0.90345	-23608
ADSL					0.48171	0.88318	0.0023715	15366	0.48834	0.079135			0.16194	13491	0.038099	1512	0.79338	-10923			0.23551	11341	0.18131	26242	0.73338	-0.99742	0.41841	0.35041	0.86873	-0.39979	0.8023	-0.44984
ADSS	0.80397	-0.73127					0.8893	-10964	0.3343	0.28119			0.83502	-0.76443	0.53097	0.18422	0.086053	20049			0.4362	0.45665			0.4836	-0.004976	0.93698	-27531	0.26185	1274	0.21874	1872
ADSSL1	0.0854	0.99651	0.29872	0.19241	0.63452	-0.4936	0.48411	0.59915	0.42386	0.87951	0.64149	0.63979	0.11659	16565	0.98479	-0.29037	0.85126	-0.19336	0.59306	0.59403	0.70328	-0.2332	0.93156	-27759	0.31966	-17928	0.73588	0.49026	0.32185	0.97664	0.91083	-0.94251
ADTRP	0.47917	12514	0.41416	0.79933	0.49807	0.88378	0.14971	10659	0.093996	20466	0.032706	20356	0.94133	-12219	0.2041	0.2404	0.85505	-0.97847	0.70289	-0.14655	0.93675	-0.87651	0.25521	23269	0.20077	0.34868	0.70896	-0.028568	0.58576	-0.44565	0.92833	-25965
AEBP1	0.83834	-0.024186	0.82578	0.31184	0.37478	0.64507	0.26748	0.70324	0.50178	-0.20502	0.31329	-0.12907	0.25839	-0.86351	0.95131	-0.63387	0.64846	-0.64006	0.40192	17516	0.97798	-10933	0.32105	0.55966	0.29441	-15586	0.15414	0.93874	0.1864	-0.13578	0.4203	10417
AEBP2	0.17655	0.61244	0.23051	0.61073	0.55685	0.80235	0.45371	0.61346	0.88287	-0.44431	0.036637	21919	0.65934	-0.062134	0.079232	12069	0.43911	-0.90152	0.12359	37279	0.4819	0.64217	0.90574	-25175	0.60095	-0.53632	0.019207	14408	0.5295	0.6136	0.49385	0.20037
AEN	0.67937	-0.3642	0.80404	0.1184	0.54094	0.17885	0.97198	-15594	0.64052	0.88508	0.83771	-0.035152	0.68342	-0.23791	0.97105	-0.65457	0.95919	-0.95065	0.28959	20349	0.54774	-0.32155			0.32	0.69675	0.36474	0.6807	0.72116	0.431	0.42387	10871
AES	0.38978	-0.016393	0.022299	0.92727	0.88139	0.48244	0.82605	-0.02218	0.34475	-0.23064	0.0060463	-0.016567	0.36831	0.66534	0.79972	0.38681	0.14231	0.28117	0.41458	17024	0.23209	0.72994			0.20012	0.29333	0.92955	-15182	0.37424	0.94809	0.93269	-26515
AFAP1	0.85736	-0.4941	0.60405	0.50617	0.37053	0.70914	0.67446	0.35221	0.050419	21903	0.69253	-0.96789	0.065205	21253	0.22199	0.57602	0.014426	13887	0.28689	17511	0.070978	15194	0.12011	1872	0.14443	0.96239	0.61069	-0.63405	0.60916	-0.057977	0.21622	18321
AFAP1L1	0.32917	0.92198	0.13539	0.96727	0.70903	-0.15446	0.86414	-0.054122	0.33635	10149	0.091735	0.88904	0.50189	0.55252	0.57347	0.17408	0.81402	-0.43494	0.37943	19679	0.11184	17128	0.34201	12958	0.20963	13486	0.84919	-0.14833	0.22334	16514	0.59239	0.48606
AFAP1L2	0.93381	-0.67739	0.76239	0.16184	0.89489	0.014096	0.82551	0.30029	0.55484	0.11371	0.57528	0.2498	0.87019	0.074503	0.21152	0.41064	0.60321	0.041614	0.81404	-1042	0.41542	0.42556	0.25725	18625	0.27212	0.63695	0.94293	-14282	0.82268	-0.38234	0.70863	-1.01
AFF1	0.28648	0.25373	0.54832	-0.35508	0.49597	0.43286	0.79428	-0.015003	0.19525	0.10587	0.55707	0.12464	0.52214	0.38962	0.64011	0.29284	0.92014	-11153	0.69051	11235	0.80491	-0.99106	0.085107	36294	0.84857	-0.15899	0.075098	-0.24416	0.5069	0.16636	0.94837	-2223
AFF2	0.83438	-0.6301	0.10983	0.96272	0.85625	-0.078424	0.042415	12961	0.42322	0.37434	0.69322	0.68167	0.35795	0.8779	0.76079	-0.13164	0.99394	-1596	0.8121	-10198	0.21631	11905	0.14185	30966	0.87901	-18115	0.56612	-0.74603	0.28651	0.098869	0.9701	-30896
AFF3	0.092982	16428	0.08125	11142	0.21249	11695	0.13941	0.50222	0.28708	0.9789	0.3779	0.39893	0.60353	0.70522	0.66234	0.23983	0.2896	0.89997			0.7925	-12771	0.41976	0.79567	0.2526	-0.056964	0.16261	16201	0.39687	0.92075	0.60858	-17336
AFF4	0.76868	0.6007	0.48958	0.55654	0.61162	0.49016	0.74942	0.3424	0.46883	0.87943	0.22147	11306	0.19267	13596	0.62604	0.020097	0.17856	-0.73691	0.065786	34481	0.6005	-0.42562	0.89727	-2436	0.22722	0.17076	0.14962	-0.26953	0.19915	0.090228	0.025835	27742
AFG3L2	0.95119	-0.56739	0.98932	-16932	0.98887	-15382	0.00014803	16642	0.24446	0.99551	0.33701	-0.17834	0.62722	0.26192	0.5198	0.59879	0.99921	-16967			0.67987	-14077	0.99248	-25578	0.84276	-15337	0.4874	0.2974	0.96401	-12959	0.77199	-0.40364
AFM	0.33626	0.97217	0.1323	0.71081	0.41128	0.60391	0.18194	0.99253	0.19447	15222	0.72477	0.19028	0.10335	13087	0.34448	0.5311	0.70899	-0.62052	0.93074	-23356	0.70598	-0.055459	0.35666	0.077296	0.74922	-14094			0.86232	-10636	0.96833	-30984
AFMID	0.73722	-0.3531	0.5797	0.42958	0.10183	11917	0.91428	-0.48394	0.47785	0.59001	0.20432	0.042513	0.23564	0.56319	0.61293	-11174	0.12691	10396	0.13189	35644	0.75361	-13324	0.29336	16673	0.11843	15315	0.16727	13404	0.76094	0.58566	0.23946	12019
AFP	0.067095	2359	0.52518	0.1842	0.80401	0.17267	0.823	-0.45002	0.12903	16681	0.19481	10635	0.55825	0.21829	0.21869	-0.09373	0.45015	0.47353	0.35949	20204	0.70337	-0.89783	0.36168	0.97805	0.28186	-13702	0.35049	0.27676	0.082001	13157	0.92993	-1715
AFTPH	0.33083	11434	0.079666	1401	0.18155	10004	0.13817	0.93537	0.77053	-0.24608	0.21174	2022-04-01	0.56184	0.29304	0.35723	0.90573	0.67958	-0.033055			0.017891	0.79633	0.67491	0.10005	0.65528	-0.055526	0.14646	11374	0.39713	0.9309	0.53077	0.47778
AGA	0.32095	0.71452	0.32488	-0.58783	0.0081892	17044	0.40591	0.54702	0.39724	0.14154	0.75524	0.27095	0.73056	-0.0061325	0.1891	0.72552	0.77653	-0.5539	0.43649	16634	0.62835	0.30284	0.23129	-11234	0.099272	-0.031696	0.40141	0.57989	0.62018	-17029	0.58842	-0.32431
AGAP1	0.0066401	15376	0.78849	-0.028367	0.53377	0.23641	0.015343	0.55864	0.71115	-0.36841	0.44348	0.072885	0.82875	0.37168	0.41596	0.81221	0.3165	0.25912			0.99587	-16868			0.052308	22271	0.71599	-22183	0.19129	11811	0.7203	-0.011425
AGAP2	0.63412	-0.17864	0.49354	0.083028	0.32002	11661	0.29929	0.48551	0.68995	-0.03721	0.803	-0.57685	0.37275	0.40087	0.12078	13688	0.12583	0.77019			0.36105	0.53764	0.67036	-0.76979	0.69763	-0.024972	0.81434	-0.13329	0.1391	15912	0.40468	0.35472
AGAP3	0.78256	-0.61037	0.87287	-0.00088051	0.013637	24765	0.044954	11881	0.51938	0.12226	0.21992	15043	0.70523	0.054289	0.6862	-0.31933	0.65364	0.17459	0.78138	-0.75602	0.4455	-0.012569			0.23987	0.15713	0.3033	0.34504	0.39563	0.80901	0.71382	-1046
AGAP4			0.45248	0.05771	0.80896	-0.6065	0.35601	0.81924	0.24808	11814	0.97254	-0.69911	0.86778	-0.069144	0.089312	17499	0.56195	-0.15351			0.13858	0.84442			0.43278	0.2276	0.093559	16222	0.80716	-1819	0.19402	19806
AGAP6	0.14902	16214	0.98001	-1384	0.64773	0.10811			0.54569	0.098298	0.29998	0.98879	0.57182	0.22465	0.63861	0.19591	0.46375	-0.095774			0.37288	0.93757			0.12897	0.8188	0.39638	0.76182	0.69345	-10704	0.64849	-0.022817
AGAP9	0.89651	-0.99926	0.8104	-0.65793	0.21691	0.34126			0.48435	0.46807	0.27625	1113			0.60976	-0.01781	0.66043	-11968			0.042027	26398			0.49902	-20573			0.87493	-16022
AGBL1	0.058887	0.24587	0.24667	0.56516	0.83767	-0.085278	0.64795	0.25801	0.65132	0.48612	0.7067	0.56665	0.093075	15856	0.31662	0.92522	0.013859	11842	0.7812	-0.74677	0.72193	-13084	0.49739	0.60969	0.3774	-0.044708	0.9724	-0.73387	0.32603	0.91637	0.3561	0.29722
AGBL2	0.54453	0.10901	0.44732	0.29744	0.23356	12297	0.76233	-0.38615	0.30883	0.75806	0.090968	0.5164	0.7782	0.30471			0.18018	0.7363			0.66557	0.014061			0.090927	19934	0.80313	-0.61006	0.70242	-11228	0.50864	0.12987
AGBL3	0.34469	10169	0.039398	13389	0.95124	-0.74377	0.92426	-0.72175	0.67079	0.63745	0.17751	0.97592	0.81802	-0.056903	0.07608	11687	0.77834	-0.172	0.86652	-0.021242	0.4815	-0.25053	0.7148	0.78236	0.267	11151	0.42889	0.589	0.96168	-15621	0.93994	-0.62045
AGBL4	0.079347	17593	0.80775	0.56004	0.50051	0.26652	0.7671	0.54143	0.6919	0.062569	0.49903	0.97903	0.5487	0.605	0.63217	0.34369	0.17089	0.83438	0.7445	-0.47069	0.48769	-0.53563	0.30331	15633	0.15539	-0.063224	0.23456	12667	0.73947	0.58275
AGBL5	0.8533	-0.82573	0.55816	0.096728	0.88051	-0.88017	0.89876	-0.59938	0.849	-0.80826	0.078193	21079	0.063719	16905	0.71493	0.10199	0.18192	0.55767	0.6682	0.090994	0.55871	-0.42089	0.11212	27895	0.10034	15818	0.81058	-0.38766	0.68379	-0.41218	0.024831	37123
AGER	0.061989	21552	0.90351	0.19271	0.13527	16332	0.40229	0.15308	0.42382	0.07094	0.94891	-12694	0.59193	0.30911	0.27812	0.96364	0.65254	-0.14261			0.3135	-0.79348	0.6534	0.60992	0.90499	-12785	0.67805	-1304			0.57841	-0.20639
AGFG1	0.82196	0.5783	0.40859	-0.080815	0.74586	-0.40173	0.11613	13055	0.32303	0.54671	0.80929	-0.62676	0.40026	0.49539	0.64741	-0.28907	0.53629	-11123	0.82532	-11205	0.64656	-0.38851	0.2096	18041	0.78911	-0.4281	0.16178	11385	0.25268	-0.83427	0.10257	26491
AGFG2	0.99559	-0.44226	0.10013	0.50182	0.41986	0.85342	0.78637	0.44422	0.03746	-10749	0.88937	0.03514	0.17486	11944	0.47788	0.40544	0.54312	-0.017738	0.16059	33027	0.44862	-0.48547			0.89798	-0.48102	0.87041	-0.37712	0.005189	2215	0.16428	-0.44394
AGGF1	0.82212	-0.30323	0.030642	13723	0.10639	16758	0.63799	-0.007647	0.45783	0.98506	0.13206	0.052551	0.58923	0.71666	0.64079	0.29783	0.89897	-0.40621	0.76385	-0.37725	0.41646	0.26151	0.12116	20706	0.74721	0.11535	0.4047	0.24499	0.91638	-0.44221	0.98919	-27518
AGK	0.14501	0.53022	0.51865	0.38113	0.96788	-0.73131	0.16603	10979	0.80105	-0.69344	0.10248	1567	0.44431	10009	0.97113	-10637	0.5163	-0.83076	0.088599	29442	0.90582	-0.62476	0.29156	16373	0.8798	0.14916	0.86833	-0.79348	0.46543	0.084874	0.50577	0.69274
AGL	0.25395	11871	0.10061	0.31046	0.66192	-0.14128	0.71791	-0.11581	0.28678	0.76346	0.16696	0.28114	0.399	0.91303	0.75366	0.10132	0.10043	16323	0.03347	48693	0.71029	-0.43168			0.83143	0.1281	0.59953	0.082646	0.040328	24829	0.03463	13816
AGMAT	0.10773	-0.62953	0.75607	0.4484	0.6048	-0.59037	0.77376	-0.28047	0.87122	0.7194	0.21519	0.64133	0.56235	0.18635	0.79213	-0.64895	0.015538	20247	0.20411	18757	0.7143	-0.29835	0.65626	-10879	0.75027	0.44178	0.80102	-0.27841	0.59479	-0.72121	0.22262	0.6491
AGMO	0.78617	0.42172	0.017795	0.7024	0.25602	-0.21527	0.79425	-0.11948	0.66559	0.17996	0.78994	-0.073802	0.074943	0.76401	0.29431	0.84243	0.99716	-1557			0.16259	14391			0.36082	0.59818	0.24146	1072	0.85208	-18881	0.58479	-20426
AGPAT1	0.1531	1971	0.4771	0.6685	0.16419	11654	0.37072	0.35247	0.92905	-0.50043	0.21008	12666	0.7806	0.23951	0.64192	-0.032269	0.56902	0.35971	0.75776	-0.54212	0.17306	-0.42597	0.29854	1622	0.50721	-0.72406	0.27664	0.61739	0.48751	-0.16141	0.70884	-0.73616
AGPAT2	0.13176	1394	0.22673	0.5473	0.6762	-0.14324	0.26342	0.40061	0.72215	0.3125	0.6847	0.49281	0.11835	20906	0.72901	0.21417	0.89794	-12815	0.55314	0.9327	0.36205	0.78967	0.3173	14753	0.66774	-0.21533	0.077162	1677	0.93917	-16241	0.29007	12932
AGPAT3	0.29913	10227	0.92862	-0.29456	0.36213	0.99425	0.29303	-0.25996	0.23083	13268	0.77565	0.37172	0.63948	0.61866	0.11061	0.69018	0.49997	-14935	0.62987	13115	0.63317	-0.17574	0.96758	-20192	0.37931	0.090409	0.098231	10363	0.82085	-0.63566	0.96588	-12204
AGPAT4	0.79211	-0.059868	0.57688	-0.9734	0.45481	0.44365	0.69235	-0.17525	0.86602	-0.16201	0.72476	0.16032			0.39625	-15742	0.093517	0.95309	0.64639	-0.42333	0.62764	0.45586	0.82156	-18141	0.21681	0.91944	0.66174	0.045744	0.21335	0.96277	0.068985	31398
AGPAT5			0.55223	0.09612	0.2157	15038	0.071151	1523	0.25726	0.98912			0.43226	0.73921	0.55962	0.69078	0.036478	0.70015			0.54428	0.46118	0.12774	31954	0.71068	0.050787	0.82249	-15115	0.05395	-0.22492	0.064061	32673
AGPAT6	0.43419	-0.15614	0.4366	0.47441	0.97128	-15027	0.11502	11051	0.83605	-0.24652	0.75707	-0.88297	0.36354	1293	0.51265	0.73717	0.25323	0.84631	0.60571	0.50858	0.16588	1937-01-01	0.49922	0.2834	0.48095	-0.002116	0.6491	-1275	0.3719	-0.16661	0.49852	0.22313
AGPAT9	0.38171	0.51076	0.75173	0.21131	0.55635	0.71256	0.85488	-0.66933	0.56459	0.1706	0.75011	-0.40318	0.77661	-0.26284	0.13758	13688	0.3017	0.81506			0.58452	-0.27555	0.46635	0.017032	0.11605	15721	0.76785	-13898	0.15313	11673	0.45743	0.49975
AGPHD1			0.17113	0.75694	0.65536	-0.17081	0.076705	-0.4807	0.40323	0.80713	0.86811	-0.29127	0.096584	0.81442	0.027351	0.46517	0.25408	-0.6152			0.1017	20219	0.88581	-2343	0.53331	-1267	0.07378	18991	0.59483	0.40218	0.78935	-15149
AGPS	0.055244	11689	0.47047	0.55951	0.27566	10034	0.79198	-0.38119	0.063777	21787	0.34661	0.77473	0.65782	0.58556	0.57008	0.61329	0.1636	-0.44486			0.26106	-0.11799	0.9192	-26445	0.16494	16507	0.97005	-0.74864	0.42228	0.70654	0.28717	13418
AGR2	0.085446	20346	0.75978	0.17567	0.44224	0.80608	0.7088	-0.45122	0.46603	0.081567	0.95141	-0.52807	0.95255	-0.81451	0.99305	-0.52379	0.48672	-0.048206			0.43146	-0.57953	0.75533	-13272	0.38501	0.61154	0.20157	10338			0.027661	2524
AGR3	0.61835	-0.13475	0.96255	-0.048748	0.99457	-0.67944	0.68817	-0.65129	0.70661	0.50051	0.64287	-0.29978	0.058946	19658	0.56922	-0.044634	0.63373	-0.013937	0.48761	0.12936	0.368	-10393	0.90856	-25424	0.2555	0.64003	0.89685	-15759	0.20595	12426	0.72599	-13392
AGRN	0.18357	0.58961	0.66699	0.25029	0.40774	0.37053	0.788	-0.0026178	0.5751	0.66354	0.28816	0.22721	0.6512	0.66584	0.23627	0.84352	0.51828	-18913	0.8222	-13337	0.14207	12861	0.42168	-0.30637	0.90758	-0.50327	0.41542	-0.6431	0.72244	-0.76544	0.081251	29143
AGRP	0.3237	-0.21234	0.92371	-0.59337	0.52316	-0.62979	0.29004	0.15451	0.17959	13244	0.61682	0.70172	0.20647	11149	0.68311	0.20588	0.56222	0.014834	0.0074855	54129	0.6934	-0.4429	0.38618	0.72722	0.71473	-0.34367	0.45743	0.51752	0.43915	0.67699	0.31496	-0.71202
AGT	0.79554	0.11313	0.18208	11276	0.078272	-0.32101	0.30317	0.67222	0.36831	0.82764	0.36546	0.5805	0.30738	0.66762	0.50009	0.3169	0.031561	12287	0.28637	2473	0.77482	-23378	0.72491	-0.60328	0.15215	18302	0.027016	22904	0.37215	0.63473
AGTPBP1	0.31875	11165	0.3335	0.8202	0.38091	0.63742	0.32584	-0.20609	0.29438	11924	0.71517	-0.024455	0.46675	0.61755	0.00016416	2433	0.52469	-0.68962			0.24964	-0.11988	0.81612	-0.29512	0.28223	0.87893	0.10106	-12555	0.020612	36471	0.89531	-0.67274
AGTR1	0.57783	-0.0068656	0.14131	0.53773	0.90634	0.049311	0.43338	0.096589	0.98134	-10797	0.10906	11966	0.37641	0.8663	0.51215	-0.44296	0.72928	-0.52239	0.95016	-0.52274	0.43457	0.49585	0.88431	-0.85307	0.95309	-0.88662	0.7709	-0.23961	0.9751	-2219	0.78547	-0.79938
AGTR2	0.84639	-0.51023	0.99534	-0.7792	0.009382	18239	0.91925	-0.45532	0.96398	-0.39908	0.43953	-0.50487	0.9002	-0.62237	0.33273	0.19381	0.17541	0.23681	0.69688	0.9907	0.69212	0.43287	0.59341	0.61864	0.73721	-0.33707	0.38848	0.19354	0.96776	-14398	0.3271	11958
AGTRAP	0.0024141	28531	0.84033	0.37367	0.94699	-0.73227	0.38777	0.29707			0.11412	17254	0.45968	0.81768	0.88898	-0.64246	0.62729	0.27105			0.17908	14585			0.71064	-13314	0.11241	-0.25067	0.72794	-0.67339	0.70295	-0.97802
AGXT	0.47758	0.51942	0.036814	-0.12423			0.67006	-0.16642	0.65755	-0.37129	0.1163	14949	0.372	13726	0.69076	-0.027611	0.56415	-11395			0.65401	0.4015	0.21316	23583	0.54061	0.231	0.78149	-0.22698	0.82067	-18937	0.34001	1246
AGXT2	0.020062	17313	0.38362	0.4293	0.64548	-0.03439	0.33592	0.34428	0.1665	20398	0.055406	17374	0.27717	0.40481	0.4583	0.57092	0.086867	17934	0.15746	34345	0.76651	-0.78457			0.58928	-0.27098	0.15386	17633	0.71596	-1232	0.10571	23098
AGXT2L1	0.83281	0.13642	0.93616	-0.35507	0.17018	0.75901	0.42301	0.49422	0.65306	0.32375	0.5138	0.73164	0.74432	0.73233	0.23118	0.14941	0.34719	0.65027	0.72602	-0.28628	0.47952	-1286	0.81079	-17322	0.77034	0.19782	0.6135	-0.060704	0.94384	-1493	0.6307	-0.61026
AHCTF1	0.0077769	31326	0.078187	16053	0.87794	-0.25813	0.39067	0.081385	0.8247	0.37433			0.88703	-0.36846			0.16438	12149	0.74513	-0.44885	0.055058	15776			0.8734	-16742	0.96398	-29263	0.61015	-2365
AHCY	0.85332	-0.12512	0.80252	-0.03498	0.96465	-10409	0.81705	-0.42623	0.94999	-0.43817	0.33893	-0.31688	0.69396	0.35627	0.9354	-0.55268	0.91891	-17987	0.93195	-0.97122	0.45496	-22574	0.67543	-0.3949	0.72472	-0.52868	0.55583	-13762	0.82935	-14994	0.54578	-12691
AHCYL1	0.82879	0.45878	0.32774	0.59996			0.87454	-0.5565	0.72458	-0.53612	0.25837	0.44537	0.67888	0.47302	0.33093	0.91129	0.017512	15779	0.01857	49888	0.037073	10314	0.75222	-13196	0.0097024	12987	0.49101	0.038122	0.21768	1599	0.63601	-0.33854
AHCYL2	0.024009	19839	0.28137	0.18438	0.72097	0.13883	0.71028	-0.11096			0.14179	14679	0.72164	-0.45822	0.84273	-0.8214	0.2647	0.90474	0.27663	27022	0.928	-10716	0.82597	-18461	0.61828	0.50934	0.38967	-0.89952	0.41762	-0.36678	0.91821	-0.55561
AHDC1	0.41645	0.94658	0.090518	0.82367	0.24987	0.36328	0.81939	-0.12154	0.008375	2037	0.52615	0.51943	0.77745	-0.12823	0.0071933	18141	0.81009	0.39235	0.58262	13283	0.82426	-13167	0.28342	16318	0.19045	11585	0.2639	0.87967	0.58946	0.15448	0.59619	-0.70015
AHI1	0.35962	12487	0.38961	0.78123	0.80307	-0.50268	0.89585	-0.54278	0.52966	0.57411	0.050286	21222	0.27755	14197	0.092867	16074	0.57067	-0.40779			0.57142	-0.080182	0.33266	14103	0.033493	18233	0.63931	-12051	0.4741	0.025721	0.83213	-14064
AHNAK	0.97778	-0.551	0.035839	0.93637	0.56095	0.18748	0.58956	0.25399	0.14656	0.76412	0.78525	0.50414	0.5746	0.91497	0.5277	0.34711	0.55825	-10767			0.16428	0.93122	0.8776	-22714	0.32295	0.91885	0.035218	12539	0.87929	-22848	0.48721	0.76866
AHNAK2	0.35283	10855	0.4476	0.61675	0.074457	16334	0.63615	0.50695	0.027522	16388	0.72143	-0.2098	0.078465	13501	0.72147	0.09923	0.45876	-0.96685			0.58834	-11893	0.06299	40745	0.66404	-0.91716	0.93906	-0.91722	0.83715	-14436	0.024393	28807
AHR	0.34209	-0.3561	0.16782	0.52892	0.99164	-0.73998	0.8944	-0.42412	0.24972	0.48236	0.92864	0.15399	0.95224	-0.075187	0.96959	-0.024256	0.861	-0.29365	0.92533	-22593	0.7426	-0.31397	0.26829	16132	0.6071	-17592	0.91816	-0.6674	0.7055	-19296	0.67748	-0.77197
AHRR	0.37407	11827	0.23878	0.77939			0.75854	-0.05506	0.65474	0.73552	0.77703	0.54064	0.74408	-0.36748	0.33899	10158	0.15879	14999	0.036219	46469	0.41772	0.03449	0.30719	0.95876	0.17087	0.90693	0.74071	-0.18103	0.70389	-10965	0.21467	-0.46582
AHSA1			0.10763	0.80798	0.14605	0.92663	0.44559	0.2848	0.58689	0.67321	0.85126	-0.54463	0.37654	0.75732	0.11805	0.69107	0.31238	0.81125	0.11689	25885	0.3197	-0.51629	0.52569	0.13755	0.73703	-0.056079	0.50841	0.28854	0.14889	15236	0.35121	10525
AHSA2	0.50411	-0.47831	0.55793	0.0010621	0.29606	1106	0.7263	0.24534	0.093724	14065	0.044221	12985	0.79477	-0.54607	0.99103	-0.94493	0.35859	0.5764	0.40084	17733	0.42814	0.20887	0.69635	-0.93282	0.0093384	0.092419	0.6202	-0.9869	0.82115	-13765	0.26281	14681
AHSG	0.82492	-0.49224	0.79338	0.20975	0.31092	10594	0.45836	0.42043	0.18321	11152	0.43994	-0.61359	0.50188	0.64029	0.17274	0.64783	0.14471	0.16341	0.39399	17643	0.22379	12009			0.80011	-13058	0.56346	-0.77688	0.19869	0.17846	0.85617	-20219
AHSP	0.26124	1243	0.92473	-0.44388	0.0086506	21388	0.32901	0.78035	0.84583	0.36777	0.52357	0.90624	0.35354	12431	0.29354	-0.14402			0.70715	-0.17707	0.70917	-0.49273	0.52152	-0.36274	0.6381	-11206	0.20558	12366	0.14911	12172	0.95872	-29196
AICDA	0.50355	0.90681	0.12318	10428	0.62376	0.47994	0.53546	-0.32648	0.60049	0.3902	0.76287	0.22166	0.22077	15323	0.09795	10163	0.20856	12468			0.10152	18774	0.39362	0.6872	0.050973	13991	0.90825	-0.30347	0.038256	13504	0.77682	-0.75081
AIDA	0.032325	27073	0.356	0.1197	0.99878	-0.83882	0.98398	-1157	0.55632	0.21025	0.4874	0.8008	0.55542	0.59752	0.86284	0.084666	0.43347	-0.14391			0.18457	0.16165	0.34425	12864	0.21545	-20106	0.81501	-0.013912	0.37675	0.80427	0.76306	-0.086274
AIF1	0.37418	-0.71087	0.97997	-10959	0.56497	0.21388	0.22571	0.35514	0.79247	0.29679	0.83484	-0.67126	0.57489	-0.22912	0.00015469	15353	0.82208	-10929	0.50787	11103	0.19385	12276	0.38003	13954	0.72075	0.27218	0.69822	0.35745	0.83167	-0.85006	0.29545	0.71195
AIF1L	0.69153	-0.69641	0.78062	-0.16937	0.59099	0.63611	0.96845	-0.59517	0.78941	0.5203	0.41546	0.50388	0.82662	0.50322	0.25808	-0.19288	0.25575	0.47719			0.75311	-21669	0.044919	33169	0.73283	-13049	0.52853	-0.98008	0.62557	-0.85996	0.54116	-0.79661
AIFM1	0.3556	0.70826	0.52657	-0.011219	0.25141	12721	0.91086	-0.032879	0.54274	0.70718	0.52705	0.91807	0.16211	-0.13765	0.24248	0.44182	0.43779	-1451	0.43189	1582	0.51362	-0.64558	0.86398	0.67988	0.46446	0.31404	0.9963	-19254	0.57421	0.55142	0.15031	15106
AIFM2	0.44312	0.15592	0.1485	10528	0.26429	11018	0.51054	-0.5858	0.39313	0.87272	0.98298	-10366	0.081803	-0.046486	0.70712	-0.58489	0.37823	0.63613	0.65657	1011	0.21361	-1002	0.7722	-1463	0.3046	0.041324	0.16053	14378	0.69525	0.023497	0.9085	-19596
AIFM3	0.84297	-0.29033	0.057527	14907	0.85361	-0.037699	0.024268	10982	0.56244	0.19381	0.042824	16711	0.057471	26343	0.77017	0.12633	0.86833	-0.99042	0.90845	-12622	0.35036	-0.088862	0.32868	14527	0.75447	-0.23682	0.38645	0.92695	0.83557	-18989	0.19518	19622
AIG1	0.6538	0.61787	0.47924	-0.45221	0.75291	-0.41367	0.8108	-0.11065	0.41906	0.27682	0.62457	0.011086	0.0036842	27487	0.61146	-0.17322	0.87303	-14404			0.56441	-0.55223	0.49123	-0.33328	0.40208	0.39551	0.84529	-15695	0.57555	-0.14617	0.81431	-16942
AIM1			0.59239	0.072144	0.050944	0.50582	0.7734	-0.39654	0.013961	25648	0.52749	0.32329	0.3982	0.90667	0.70572	0.41497	0.47443	-0.36833	0.54233	0.9349	0.44411	-0.19009	0.88885	-23732	0.74203	0.24667	0.75021	-0.61193	0.023582	25155	0.62089	0.63068
AIM1L	0.21594	15758	0.11567	-0.34102	0.1434	12356	0.96921	-0.42022	0.42965	0.30547	0.92547	-0.030111	0.91365	-0.10007	0.048763	-0.061044	0.4839	-0.6225	0.24397	28035	0.2109	0.81852			0.48717	-0.51097	0.24661	10652	0.70232	0.25341	0.37515	10359
AIM2	0.37969	0.95825	0.91642	0.13499	0.66297	-0.087976	0.33782	0.46503	0.23576	1939-01-01	0.70074	0.52031	0.80226	-0.58241	0.53451	0.78284	0.65132	-0.57795	0.40222	21246	0.45388	-0.061596	0.4868	0.98926	0.39223	-0.84685	0.31805	0.76336	0.017522	35389	0.16263	15166
AIMP1	0.62628	0.62351	0.8837	-0.34257	0.75278	0.37558	0.34637	0.031826			0.31675	0.91344	0.38571	10346	0.062317	11029	0.49357	-0.35007	0.063996	42186	0.66642	-1305	0.33079	13602	0.61487	0.40084	0.395	0.60506	0.85227	0.11378	0.98584	-0.86187
AIMP2	0.28819	12513	0.35129	0.80371	0.96391	-0.66655	0.84187	-0.18322	0.49467	0.71944	0.22789	11358	0.79076	-0.61301	0.64838	0.14846	0.19283	0.87717	0.67318	0.059451	0.79894	-0.42764			0.79719	-0.56728	0.14282	1223	0.39619	-16053	0.74265	-10168
AIP	0.4284	0.55412	0.48605	0.5024	0.77875	-0.39067	0.68049	0.043794	0.39603	0.74368	0.80148	-0.57954	0.905	0.40287	0.00062014	27585	0.5383	0.44088	0.71813	-0.31569	0.11173	-0.36742			0.13978	16899	0.11777	0.79991	0.67029	-0.95431	0.2583	17433
AIPL1	0.85904	0.23049	0.8467	-0.73934	0.97047	-11865	0.27522	0.097574	0.61337	0.69968	0.73063	0.19554	0.19548	14069	0.17554	0.82094	0.64851	-0.73635	0.075859	33795	0.19296	0.82321	0.81381	-14698	0.43549	-0.086205	0.5559	0.41785	0.68869	-0.72752	0.87143	-0.59274
AIRE	0.17788	17785	0.5948	-0.19295	0.46751	-0.54469	0.39398	0.19645	0.33271	0.098572	0.35802	10125	0.26793	0.83386	0.41968	0.49154	0.064184	12108	0.22837	28464	0.5633	-0.20506	0.65147	-0.64389	0.47659	0.64919	0.87287	-0.34142	0.61234	-13936	0.22721	12319
AJAP1	0.19677	12841	0.91613	-0.25404	0.127	0.46684	0.69953	0.16428	0.19732	0.72109	0.31463	0.68735	0.43375	0.66039	0.19708	10982	0.7111	-0.77744	0.79295	-0.82771	0.60748	0.46103	0.19694	25168	0.88224	-0.49662	0.15981	13156	0.52266	0.055516	0.70568	0.36434
AJUBA	0.35741	0.94949	0.48193	0.65343	0.55952	0.45249	0.6025	0.5959	0.68932	0.079428	0.66329	0.48081	0.50183	0.022141	0.35855	0.95689	0.72579	-0.88754			0.036463	19438	0.57798	-0.21854	0.11884	-0.49561	0.71375	-0.67386	0.072498	0.18421	0.30182	0.026834
AK1	0.87023	-0.974	0.78996	-0.41689	0.54171	0.64799	0.4389	0.27688	0.60145	0.022181	0.49688	0.64471	0.06871	1287	0.61851	-0.13055	0.88922	-0.23374	0.81592	-14511	0.80189	-10436	0.31398	13884	0.22451	0.40338	0.9103	-14808	0.8821	-10619	0.43575	0.85388
AK2	0.82355	0.14471	0.31051	0.061862	0.50407	-0.40428	0.9701	-0.4024	0.045371	0.63331	0.62989	-0.26062	0.99239	-18479	0.52218	-0.083422	0.69914	0.021428			0.79254	-0.94959	0.23503	1162	0.26898	-0.14489	0.54095	-0.10202	0.90816	-2904	0.44163	0.78722
AK3	0.88802	-0.44583	0.57847	0.45876	0.45211	0.57018	0.74557	-0.45078	0.06058	21394	0.14982	0.41033	0.5809	0.16234	0.59048	-0.16204	0.10058	1411			0.56869	-0.47888	0.50855	0.73712	0.51333	-0.12867	0.12984	12848
AK4	0.89722	-15158	0.92294	-0.84654	0.88524	0.16911	0.89442	-0.5474	0.29773	-0.18612	0.5973	0.46055	0.98508	-0.87003	0.69493	-0.59055	0.47055	-0.2522			0.31239	-11134			0.7653	-14585	0.83408	-11029	0.22631	-14118	0.48269	0.76078
AK5	0.86624	-0.044668	0.86996	-0.50577	0.25745	12911	0.69441	-0.27652	0.25514	0.73999	0.88634	-0.81932	0.55124	0.49257	0.73538	-0.51902	0.52372	0.21158	0.48898	12538	0.45632	-11787			0.52918	0.06919	0.20106	12296	0.53603	-16391	0.95417	-19458
AK6	0.23238	11402	0.75692	-0.16814	0.1257	0.98865	0.30148	0.2796	0.65215	-0.28532	0.093548	0.85824	0.72917	0.043132	0.72034	0.13026	0.60156	-0.6849			0.20725	0.66482	0.79611	-10251	0.073298	-0.027124	0.26301	-0.81254	0.48269	0.80943	0.63047	-22376
AK7	0.91077	-0.33724	0.12534	0.84833	0.47841	0.55966	0.5622	0.45843	0.0065536	25352	0.46753	0.18457	0.75196	0.68895	0.48018	0.25158	0.40168	0.22414			0.97838	-2485			0.20208	0.84045	0.72434	0.29204	0.39317	-0.16967	0.48736	0.5969
AK8	0.2331	-0.27481	0.72934	0.23722	0.50969	0.21482	0.6341	0.017685	0.46059	-0.040617	0.6992	-0.44319	0.33959	0.82528	0.55154	-0.58617	0.77403	-0.29064			0.39997	-0.44239			0.9286	-0.37553	0.73111	-0.48468	0.55221	-0.7727	0.47156	0.7246
AKAP1	0.51005	0.81985	0.85027	-0.50851	0.56876	-0.41274	0.35689	0.38396	0.90979	-0.53332	0.37204	0.35903	0.99434	-0.40249	0.60283	-0.082537	0.7837	-0.41948	0.85784	-15015	0.51061	-0.040927	0.056258	24651	0.13816	1181	0.81937	-11708	0.93451	-0.48491	0.81717	-0.092783
AKAP10	0.24851	10893	0.23769	0.91285	0.50469	0.3247	0.31707	0.47543	0.23694	11297	0.8427	-0.70805	0.93826	-0.63078	0.95108	-0.40842	0.52832	-0.84344	0.6569	0.1819	0.45015	0.35555	0.22031	21937	0.9339	-0.6674	0.43636	-11002	0.83101	-0.70391	0.84873	0.17473
AKAP11	0.67273	0.32632	0.87976	-0.097378	0.46033	0.55652			0.64899	10067	0.092829	12718	0.88898	0.39057	0.97633	-0.85037	0.18407	11111	0.33922	21562	0.035764	-0.29435			0.59192	-11601	0.24777	0.40607	0.55363	-0.074234	0.59069	0.39558
AKAP12	0.95429	-0.44902	0.96141	-14064	0.10516	18481	0.79667	-0.10477	0.26575	1116	0.7224	-0.54521	0.63861	0.34918	0.56592	-0.041341	0.87613	-0.06296	0.94601	-25523	0.88522	-0.95535	0.67103	-0.74393	0.11252	0.77557	0.71548	-0.95617	0.29069	10284	0.82295	-0.5218
AKAP13	0.26788	0.8603	0.36332	0.55342	0.31979	-0.19638	0.98785	-0.86135	0.89472	0.073022	0.92965	-0.57121	0.074567	0.024124	0.26371	0.20788	0.47936	-0.63324	0.14167	34125	0.54353	-0.21456	0.8219	-15817	0.44174	-0.65943	0.97137	-0.30195	0.75846	-0.87494	0.53342	0.5867
AKAP14	0.38611	0.68583	0.66969	0.057647	0.80179	-0.20049	0.28945	-0.41692	0.032386	19116	0.17445	11245	0.80886	-0.50088	0.94046	-0.82785	0.76794	-0.8953	0.031011	35989	0.67689	-0.59518	0.69696	0.099373	0.40685	-0.71172	0.45925	-0.23239	0.21788	0.5667	0.19419	15649
AKAP17A	0.015907	1796	0.73991	-0.11912	0.3041	0.11762	0.09092	0.34983	0.82595	-0.05974	0.41115	0.5183	0.87964	-0.10092	0.59662	0.24085	0.99636	-2.83			0.40043	-0.5699	0.70386	-0.98532	0.62839	-0.18239	0.1109	11388	0.00078209	31662	0.15491	21509
AKAP2	0.93598	-0.79231	0.38007	0.13065	0.47922	-0.1428	0.97376	-10498	0.069015	17921	0.91897	0.0914	0.013807	26565	0.14814	13072	0.27705	0.92521	0.28505	24775	0.30635	0.53077			0.2718	-0.16815	0.4941	-0.84171	0.37947	10231	0.69943	-0.52165
AKAP3	0.65296	0.85157	0.26411	0.40328	0.034869	29909	0.77643	-0.26105	0.96904	-0.88436	0.134	14871	0.14519	17815	0.5096	0.62527	0.089889	11586	0.6768	-0.26062	0.016905	18361	0.13274	12707	0.14653	16837	0.36879	0.77622	0.6224	0.21132	0.42241	0.9417
AKAP4	0.46426	0.38592	0.41846	0.45641	0.639	-0.036647	0.95819	-0.7828	0.82546	-0.73876	0.36424	0.94949			0.76213	0.29153	0.10661	15119	0.016917	41185	0.45958	-0.4254	0.26425	18754	0.96162	-11068	0.64757	-13401	0.27208	-0.039168	0.79502	-15473
AKAP5	0.73463	-0.014095	0.12559	0.99699	0.4601	0.51847	0.54059	0.34315	0.15181	14506	0.99497	-11606	0.63911	-0.037544	0.2074	0.57698	0.026218	0.85465	0.98016	-24406	0.26666	0.64598	0.4298	0.73163	0.41325	0.6326	0.55682	-0.2178	0.47152	-10155	0.40349	0.98914
AKAP6	0.8862	0.21106	0.41021	0.47791	0.013268	0.18373	0.35306	-0.26008	0.99562	-0.63995	0.47339	0.58273	0.49512	0.27022	0.94082	-0.79837	0.96584	-21404	0.30127	25272	0.85658	-15483	0.38551	-21357	0.65342	0.44868	0.71985	-1554	0.35169	0.70873
AKAP7	0.79955	-0.80948	0.4298	0.44228	0.62671	-0.078938	0.83535	0.25266	0.71743	0.30859	0.72223	-0.66282	0.84788	0.26142	0.60784	-0.44914	0.74433	0.22081	0.44494	19501	0.22755	0.88773	0.97352	-11406	0.81682	-0.41154	0.68265	0.43856	0.34922	-0.40181	0.41634	0.60461
AKAP8	0.93914	-0.71545	0.10402	0.97595	0.91014	0.10539	0.79925	0.17798	0.95007	-0.22933	0.79708	-0.64985	0.93514	-0.61669	0.56248	0.50028	0.91492	-0.96651	0.39048	0.099893	0.76607	-0.89309			0.17156	11965	0.41136	0.60372	0.55143	-0.95353	0.96413	-28669
AKAP8L	0.12036	14863	0.73035	-0.11377	0.18133	0.87936	0.032593	0.71925	0.21382	0.93856	0.53065	0.56677	0.59021	0.29361			0.061528	16212			0.089521	1872			0.83549	0.13035	0.92387	-0.68495	0.092818	1727
AKAP9	0.68621	0.59185	0.4482	0.0018292	0.82241	-0.11099	0.36896	-0.19927	0.95649	-0.12569	0.78561	0.43652			0.75759	-0.054065	0.093372	12425	0.52457	10297	0.28749	0.45609	0.72934	-0.079326	0.51213	-0.32371	0.90809	-0.25229	0.17098	11149	0.78181	0.49965
AKD1			0.041974	1322	0.58925	-0.19944	0.91357	-0.86183	0.36847	0.80495	0.94907	-0.51905	0.46349	0.17288	0.79842	-0.0089689	0.58196	-0.38138	0.097993	38414	0.76337	-16212	0.67439	-0.22782	0.67738	-0.15495	0.069383	21126	0.32069	-12523	0.062944	31515
AKIP1	0.67296	0.71395	0.19533	10094	0.21036	0.37637	0.57059	0.43227	0.90693	-0.79886	0.72329	-0.23095	0.83685	-0.14767	0.04159	14776	0.70371	-16536	0.69804	0.77508	0.49729	-0.13521	0.82084	-0.88248	0.89492	-1.61	0.83791	-19049	0.44909	0.63968	0.22876	-0.73212
AKIRIN1	0.51202	0.29783	0.84808	-0.61819	0.38157	0.54447	0.75607	0.35319			0.45318	0.88352	0.93626	-0.40379	0.75416	-0.12217	0.082229	19428	0.71769	0.98683	0.44306	0.47018			0.20277	14508	0.71573	-0.94722	0.095658	18308	0.54007	-0.050555
AKIRIN2	0.0088448	19439	0.098154	-0.28776	0.28842	1131			0.33976	10546	0.26648	13275			0.74938	-0.39573	0.00019219	17684			0.33496	1096			0.077528	20763	0.83261	-19414	0.29539	11137
AKNA	0.30697	0.50022	0.76772	-0.45729	0.53051	-0.18179	0.9085	-0.21231	0.32354	0.71329	0.32085	0.3195	0.7561	-0.46678	0.013091	19347	0.66369	-15598			0.79247	-0.36048	0.30116	17273	0.84359	-0.40397	0.89697	-17646	0.55425	0.26214	0.061797	30965
AKNAD1	0.63609	0.47682	0.23555	0.52392	0.47474	0.047053	0.97046	-0.62374	0.76773	0.7902	0.10429	0.96463	0.70809	0.52258	0.37131	-0.36085	0.32346	0.74603	0.42746	16009	0.63448	-0.24163	0.0057576	56008	0.66431	-0.036279	0.75919	-22176	0.39446	0.87818	0.29438	-0.29608
AKR1A1	0.40665	0.0023763	0.13214	10832	0.056242	0.92962	0.5379	0.31037			0.24435	10031	0.4868	0.8353	0.48076	0.59478	0.47614	0.60071	0.61317	0.46067	0.54297	0.18341	0.62743	0.78589	0.84075	-11709	0.058565	19884	0.71565	-0.42174	0.10374	13163
AKR1B1	0.05676	17139	0.80306	-0.63849	0.98306	-0.61746	0.57047	-0.26569	0.50231	-0.036561	0.82078	-0.041037	0.27018	13036	0.77838	-0.56593	0.94318	-2678			0.60845	-10899			0.36041	0.63127	0.2593	0.98767	0.47108	0.15357	0.93755	-27096
AKR1B10	0.94083	-0.40179	0.10035	11055	0.7871	0.25483	0.60373	-0.21667	0.95999	-10896	0.44759	0.19551	0.66111	-0.33965	0.72363	-0.78378	0.68838	-0.93838	0.80688	-0.24711	0.99863	-18696	0.71213	-17977	0.7201	-0.26639	0.94459	-0.90864	0.97167	-12928	0.8148	-19736
AKR1B15	0.54953	0.24331	0.84486	0.14621	0.56066	0.088064	0.89865	-10049	0.1559	14634	0.83272	0.22867	0.22966	10121	0.63756	0.033512	0.55336	-0.32662	0.46622	13779	0.070492	15717			0.94996	-0.78273	0.93751	-0.26946	0.90558	-22371	0.83744	-18569
AKR1C1	0.64285	-0.065723	0.41998	0.38908	0.67312	-0.63283	0.99979	-0.62326	0.19548	0.48201	0.88295	-0.00099627	0.66708	0.32214	0.64245	-0.15261	0.79941	-25476	0.69153	-0.43792	0.95648	-11465	0.055204	21387	0.71337	-11255	0.723	0.14419	0.72307	-0.20844	0.21402	0.90664
AKR1C2	0.54808	0.74744	0.70192	-0.58208	0.93501	-0.70946	0.42395	0.48855	0.35135	0.74045	0.45548	0.42403	0.040558	21496	0.081629	12925	0.95574	-24864	0.055586	43095	0.1761	0.34383	0.52922	-0.1682	0.26164	11733	0.29294	0.33059	0.61123	-0.94656	0.21834	0.47294
AKR1C3	0.51374	0.43018	0.57221	-0.21281	0.77111	-0.45643	0.69448	-0.54436	0.97028	-0.45929	0.72178	0.27047	0.34429	-0.30547	0.86178	-0.12233	0.74498	-13303	0.9941	-33436	0.81251	-0.46353	0.66402	-14922	0.12549	0.90327	0.98073	-22927	0.95925	-30141	0.61226	-11117
AKR1C4	0.95588	-10902	0.58955	0.51319	0.77453	-0.031446	0.8012	-0.012663	0.3407	0.95725	0.80435	0.37859	0.71738	-0.26206	0.48109	0.33871	0.029917	11891			0.29161	0.94798			0.076783	0.78268	0.40172	0.81626	0.084546	22778	0.091325	27677
AKR1D1	0.48061	0.70907	0.10119	10485	0.99683	-14712	0.64424	-10907	0.69961	-0.011794	0.18808	0.32634	0.012287	21545	0.74546	0.36744	0.47425	-0.023304	0.76634	-0.65151	0.82004	-0.48045	0.20424	25138	0.84501	-0.39645	0.92049	-0.52857	0.051498	27945	0.66975	-12983
AKR1E2	0.54572	-0.1825	0.40011	-0.036958	0.54144	0.018053	0.27119	0.078417	0.69026	0.2407	0.78552	0.46028	0.38371	10778	0.71473	0.081377	0.99456	-20864	0.4498	15058	0.76915	-11199	0.9815	-35239	0.61754	-0.4804	0.94142	-11584	0.6768	-0.28454	0.19576	19288
AKR7A2	0.13292	0.8582	0.57323	0.27331	0.36314	-0.48721	0.91758	-0.48953	0.73351	-0.053645	0.52836	0.26431	0.5129	0.56256	0.49064	0.69615	0.54385	-0.18081	0.22947	28419	0.065645	17372			0.53349	-0.63164	0.63117	-0.96338	0.91365	-12919	0.67305	0.11539
AKR7A3	0.64765	0.55943	0.5019	-13252	0.91543	-0.51977	0.86608	0.019211	0.28514	1225	0.29389	0.14475	0.9025	-0.28244	0.42519	0.30542	0.24428	-0.43643			0.68133	-0.61483	0.13746	25074	0.27561	10639	0.38553	-17944	0.84532	-0.46338	0.60691	0.57937
AKT1	0.84239	-0.37212	0.96836	-0.83005	0.63881	-0.51673	0.60499	-0.19961	0.36475	-0.81198	0.42541	-15188	0.95909	0.16877	0.85202	-0.39634	0.12706	0.52062	0.548	15762	0.11813	0.45876	0.45641	10345	0.42097	0.55463	0.61209	0.1091	0.34842	0.87258	0.43419	0.33599
AKT1S1	0.64418	0.034238	0.69606	0.38337	0.19272	14321	0.15209	0.76703	0.57375	0.14553	0.0082555	22395	0.5026	0.47977	0.1163	11648	0.88557	0.19126	0.70863	-0.20414	0.28238	10574	0.39051	10061	0.56428	0.12813	0.6995	0.25929	0.17723	1882	0.6996	-0.61587
AKT2	0.46553	0.29034	0.86735	-0.75308	0.27034	0.42749	0.1801	0.38607	0.37757	0.058867	0.77861	-0.17523	0.36964	0.5235	0.13805	0.87478	0.89058	-0.78392	0.32698	21315	0.72115	-0.059085	0.99171	-38452	0.99533	-28867	0.62515	-0.73804	0.41054	0.40994	0.22395	15007
AKT3	0.096801	10088	0.020931	0.82789	0.94123	-0.96133	0.93321	-0.057801	0.79481	-0.039452	0.39498	0.60825	0.94892	-0.2081	0.82608	0.090317	0.55306	-0.79066	0.97795	-19726	0.54543	0.44092	0.73554	-0.68955	0.55647	-0.015335	0.96461	-0.59794	0.60137	0.21435	0.3004	-0.34642
AKTIP	0.64823	0.12071	0.18499	0.10662	0.11143	0.39785	0.92255	-0.35945	0.55384	-0.21238	0.59852	0.14542	0.77268	-0.56234	0.85591	0.10946	0.94065	-0.56553	0.88585	-17904	0.51755	-0.92024	0.9098	-0.30034	0.94262	-16085	0.59257	-0.77036	0.22265	0.18097	0.66057	0.45781
ALAD	0.81921	-0.99355	0.50684	0.65332	0.76323	0.3925	0.60585	0.47576	0.50555	0.78711	0.90604	0.05037	0.16001	14558	0.65031	-0.30021	0.43925	0.29509			0.80395	-12064			0.26101	0.5292	0.0027495	14881	0.55987	-0.5018	0.81985	-17125
ALAS1	0.41286	0.11377	0.51736	0.21422	0.12264	16341	0.83744	0.19108	0.96623	-0.048422	0.24594	0.54461	0.13691	10688	0.73939	-0.72802	0.56504	-10817	0.22289	29289	0.32982	-0.73623	0.27638	0.38714	0.68095	-0.22858	0.68345	-0.043844	0.62355	-16189	0.9933	-26751
ALAS2	0.44239	11333	0.43735	0.24711	0.3732	0.70019	0.64284	0.11684	0.12538	1864	0.19023	12364	0.14889	17389	0.55963	0.59007	0.29397	0.27811			0.47287	-11071			0.15038	15874	0.043357	16522	0.52426	-0.40007	0.98854	-26792
ALB	0.65943	-0.63492	0.95343	-0.60489	0.74294	-0.159	0.42982	-0.2818	0.75422	-0.78579	0.33708	0.96152	0.73306	-0.12795	0.51272	-0.92409	0.18284	0.24027	0.7176	10691	0.27303	0.75902	0.39072	0.052393	0.68835	-1134	0.65392	-20317	0.059578	19665	0.40165	0.7003
ALCAM	0.69984	0.37928	0.42295	0.42934	0.37506	-0.56892	0.7176	0.19184	0.96621	-0.9198	0.43011	0.50328	0.61968	0.10656	0.97414	-0.84156	0.019097	13927			0.26305	0.13553	0.17116	1153	0.23286	0.56947	0.62227	-0.74991	0.78278	-0.66539	0.55974	0.76146
ALDH16A1	0.96695	-10572	0.7986	-0.02122	0.26283	0.9412	0.85794	-0.11055	0.22386	15617			0.2701	0.55629	0.1849	11527	0.56049	0.048666			0.6232	-0.36272	0.81369	0.56385	0.30289	11741	0.33757	0.88426	0.49324	0.29153	0.15875	0.93839
ALDH18A1	0.36945	0.52477	0.14205	0.25514	0.63786	-0.21427	0.74729	0.37625	0.85499	0.070522	0.29761	0.714	0.84822	0.45842	0.25406	-0.34127	0.067054	10637	0.97381	-30751	0.84696	-17475	0.055115	3609	0.88067	-0.095155	0.92871	-0.21655	0.40101	0.62719	0.3566	11963
ALDH1A1	0.039837	12552	0.90158	-0.3267	0.75947	-0.43015	0.70692	0.41532	0.711	0.57187	0.5355	0.68454	0.89173	-0.33447	0.0037473	11036	0.21244	10503	0.25111	0.81312	0.49644	0.36149	0.14622	11174	0.82659	-0.80231	0.14875	12894	0.44811	0.72735	0.73253	-0.19456
ALDH1A2	0.76181	0.011519	0.43315	0.53403	0.78403	-0.43073	0.77043	-0.32842	0.21206	0.80743	0.77146	0.70303	0.22483	11169	0.53032	0.19362	0.61084	-0.53547	0.72154	0.90973	0.70513	0.08914	0.60121	0.40905	0.75308	-15277	0.77776	-1263	0.57398	-0.71387	0.85192	-17602
ALDH1A3	0.74382	0.67567	0.36792	0.59466	0.40781	0.27033	0.49856	-0.44989	0.032654	13021	0.16248	11423	0.018025	1378	0.27486	0.62985	0.63924	0.35585			0.3052	0.32215	0.080531	1935	0.9862	-20378	0.99663	-16197	0.27185	-0.01419	0.87852	-0.88208
ALDH1B1	0.43836	0.20935	0.073058	0.54868	0.63795	-0.23216	0.73889	-0.59328	0.70394	-0.34053	0.17531	0.39126	0.61856	0.75428	0.56222	0.53942	0.73688	-11777			0.28153	0.90459			0.15713	-0.54293	0.92483	-14673	0.31725	0.53228	0.56798	-0.22538
ALDH1L1	0.91128	-0.64678	0.19053	11454	0.15025	0.48858	0.30758	0.76052			0.1031	15146	0.70321	-0.13468	0.40031	0.78949	0.53151	0.36892	0.15443	26282	0.63336	-0.40493	0.70278	-0.81105	0.34622	0.6634	0.40339	-18496	0.19636	-0.37672	0.35768	-0.29391
ALDH1L2	0.15029	0.79329	0.29095	0.7548	0.83434	-0.71391	0.72413	0.093547	0.6758	-0.3684	0.1005	18896	0.80422	0.59113	0.85997	-0.67646	0.25615	0.72893	0.32187	19276	0.15254	15273	0.4311	1468	0.8257	-13716	0.79864	-0.0067447	0.031784	21842	0.65169	-0.027152
ALDH2	0.11889	10657	0.2427	0.45538	0.082789	0.97791	0.47783	-0.37601	0.71696	-0.52326	0.36997	0.57056	0.9309	-0.11738	0.72793	0.45086	0.10541	10056	0.58422	13027	0.67407	-0.93204	0.39666	0.88322	0.0067551	19132	0.16291	1569	0.95002	-12362	0.83303	-12092
ALDH3A1	0.033796	26199	0.34587	-0.31529	0.26657	0.88046	0.34262	0.49201	0.25192	-0.56861	0.96738	-0.039632	0.11358	0.65643	0.63021	0.14787	0.94096	-0.7546	0.15699	36255	0.18047	14313			0.55086	-10131	0.46013	0.5205	0.52433	-0.15191	0.36583	11618
ALDH3A2	0.18005	16096	0.6235	-0.10832	0.088186	13104	0.44685	-0.30467	0.65442	0.28201	0.99292	-11765	0.97433	-0.4052	0.18885	0.2225	0.48555	-10608	0.29093	24272	0.32976	0.76958	0.50794	0.17747	0.86474	-0.83218	0.27156	-0.27427	0.0013731	33357	0.10654	21328
ALDH3B1	0.99898	-10022	0.8308	-0.31629	0.57901	-0.52025	0.78303	-0.4173	0.10456	17062	0.89925	0.49432	0.78183	0.53316	0.76023	-10081	0.64177	-11345			0.88379	0.16153	0.52069	0.15397	0.7789	-0.47055	0.76233	-19523	0.9885	-14719	0.76293	0.018947
ALDH3B2	0.093367	2154	0.079657	12385	0.73468	-0.31319	0.81899	0.28162	0.49828	0.87097			0.47828	-0.10179			0.37171	0.67954	0.38912	18624	0.1963	0.92705	0.099204	37041	0.92026	-13071	0.021859	24136			0.035796	34439
ALDH4A1	0.18732	17208	0.4925	0.12274	0.18228	13466	0.61754	0.41727	0.54469	0.95907	0.77569	-0.1533	0.79656	-0.5299	0.57568	0.092474	0.51432	-0.7097			0.50793	-0.09908			0.20089	0.57606	0.38477	0.11345	0.1143	19881	0.68333	-0.12671
ALDH5A1	0.42702	0.57132	0.36515	0.68471	0.48343	0.78794	0.12914	0.26945	0.17199	15101	0.60479	0.090361	0.10349	18805	0.058088	1701	0.91292	-16692	0.5035	13562	0.357	0.78563	0.75992	-13819	0.94239	-23404	0.73675	-0.40633	0.91611	-2092	0.19384	0.47142
ALDH6A1	0.54841	-0.89304	0.76067	-0.40594	0.91008	-0.40304	0.52128	-0.0089035	0.28232	-0.25645	0.45354	0.46741	0.38184	10094	0.45043	-0.059652	0.99205	-0.98987	0.58209	0.64246	0.95329	-0.30046	0.6832	-14574	0.70504	-0.040642	0.41067	-0.38061	0.49556	-0.29488	0.61676	0.64261
ALDH7A1	0.67491	0.14698	0.92806	-0.71475	0.81326	-0.10123	0.46804	0.12292	0.28994	10344	0.34213	2022-04-01	0.40768	0.11869	0.70862	0.056032	0.4605	0.090027			0.72083	-0.47746	0.46944	11315	0.75916	0.49777	0.20922	0.45671	0.77048	-12887	0.55258	-0.33227
ALDH8A1	0.15912	0.37573	0.034083	11447	0.7861	-0.37626	0.14361	-0.1241			0.15074	16484	0.78951	0.77053	0.90409	-0.33622	0.36467	-0.97464	0.28911	25061	0.042577	11208	0.60967	-0.40401	0.037063	0.91525	0.40307	-0.10578	0.11648	21689	0.88803	-2265
ALDH9A1	0.64211	0.28825	0.8235	0.13747			0.66342	0.044813	0.21992	0.41111	0.12955	16444	0.82774	-0.069172	0.20545	11874	0.39545	-0.83477			0.72388	-10522	0.8165	-17744	0.93911	-19103	0.83671	-0.96338	0.26608	-12136
ALDOA	0.85298	-0.85521	0.74431	-0.45186	0.016444	12901	0.83053	-0.18065	0.80014	-0.14993	0.64465	-0.12547	0.68561	0.75722	0.57242	-0.24975	0.38274	0.091228	0.28808	2403	0.2219	-0.48579			0.99873	-31448	0.9722	-1936	0.51687	0.66922	0.32442	0.54702
ALDOB	0.99156	-0.37311	0.97028	-0.73366	0.98705	-0.49267	0.94895	0.07663	0.36599	0.40486	0.86059	-0.015693	0.58766	-0.74697	0.0026004	11823	0.77606	-0.057567	0.21877	21609	0.70885	-0.50846	0.38515	0.6473	0.75157	-0.59988	0.80801	-0.33639	0.82773	-16262	0.97002	-12966
ALDOC	0.84064	-0.059704	0.36017	-0.093946	0.39019	-0.27131	0.72789	0.28652	0.063613	11411	0.73588	0.36549	0.022398	1778	0.74427	0.25219	0.45352	0.39825	0.7374	-0.39718	0.77278	-0.99168			0.24859	-13833	0.67451	-27357	0.10773	18518	0.32057	12847
ALG1	0.59591	-0.49053	0.5221	-0.47925	0.49881	-0.1918	0.59533	0.036144	0.66836	0.090719	0.88961	0.0020697	0.29986	1215	0.41158	0.61931	0.34471	0.59685	0.19634	12498	0.73794	-16175	0.23086	22156	0.22229	0.22055	0.67889	-1233	0.47626	0.10408	0.19907	0.84502
ALG10	0.68513	0.071773	0.47256	0.60342	0.87486	-0.33527	0.34983	-0.04304	0.72451	0.32016	0.80422	-0.2065	0.31468	0.43176	0.80786	-0.39582	0.69504	-0.44353	0.68998	-0.077066	0.96438	-14725	0.54999	0.43371	0.099196	0.54173	0.038062	16646	0.9036	-0.45904	0.18102	20081
ALG10B	0.25255	0.28418	0.87045	-0.088348	0.58033	0.66967	0.05482	11283	0.42325	0.63348	0.66622	-0.18443	0.61422	0.89066	0.69498	0.41751	0.65403	0.41805	0.39675	18246	0.22961	0.42607	0.87351	0.08195	0.65487	-0.12526	0.88224	-20499	0.55827	0.50558	0.31007	10177
ALG11	0.48789	-0.080851			0.021912	21679	0.20434	0.47495	0.78087	-0.10252	0.56688	0.06546	0.21893	0.8577	0.86782	-0.19895	0.70262	-0.84293			0.37681	-0.33753	0.033444	2796	0.98392	-0.886	0.44743	-0.48411	0.7221	-0.73672
ALG12	0.25968	0.98856	0.6086	0.035903	0.25504	10777	0.19471	0.84637	0.10994	18465	0.84806	-0.58218	0.15455	15366	0.32676	0.75234	0.73466	0.50251			0.25479	10864	0.53097	0.10496	0.93991	-27645	0.073396	20189	0.60726	0.60573	0.75327	-12851
ALG13	0.66894	-0.23087	0.5839	0.30343	0.51536	0.85551	0.78716	-0.39567	0.58603	0.32622			0.16765	15412	0.43743	0.80507	0.33494	0.54667			0.59249	-0.040264			0.27881	0.45488	0.81684	-0.84187	0.73975	0.25025	0.14736	14819
ALG14	0.41542	0.54449	0.63203	0.44841	0.74998	-0.35503	0.56118	0.3427	0.78785	0.19082	0.46665	0.30834	0.46851	0.14455	0.91452	-0.67323	0.0079218	18693	0.096834	36501	0.30267	0.73583	0.3706	0.72372	0.88811	-17424	0.15463	13132	0.48929	-0.58738	0.23264	1732
ALG1L			0.12111	15401	0.73989	0.045751	0.65935	-0.038795	0.56589	0.15028			0.24181	14494	0.33492	0.8784	0.32485	0.78468			0.9352	-25102			0.63702	-0.96877	0.86626	-19161	0.65942	-0.85748	0.98279	-20787
ALG1L2	0.1092	19901	0.8161	-0.68182	0.50305	-0.18337	0.46392	0.58539	0.40265	0.68809	0.69485	-0.26907	0.67523	-0.081656	0.88383	-0.75084	0.9557	-11344			0.015803	24947			0.59799	0.36605	0.89658	-23823	0.24057	13508	0.74744	-12586
ALG2	0.39022	0.71421	0.29853	0.64379	0.35441	0.51149	0.75724	0.012773	0.90049	-0.55456	0.62296	0.50739	0.40346	0.76213	0.028631	10019	0.64154	-0.9395	0.50277	10795	0.82561	-0.81058	0.38297	0.99826	0.39429	-0.59667	0.9202	-12204	0.71099	-11902	0.54651	0.31604
ALG3	0.10962	0.68163	0.039721	12197			0.74161	-0.61125	0.88099	-0.52268	0.77586	0.099456	0.47095	-0.48838	0.86602	-0.13277	0.66523	-0.65237			0.6174	-0.73824	0.21451	23414	0.67137	-0.60792	0.057595	0.9509	0.48639	-14932
ALG5	0.53891	0.50462	0.082364	0.95152	0.63287	-0.23902	0.27196	0.89632	0.17787	12041	0.07736	14633	0.0081706	22826	0.27532	0.95614	0.14036	10273	0.1585	33901	0.74477	-1369			0.40519	0.40098	0.012168	15213	0.0042463	12252
ALG6	0.55052	0.22418	0.11277	11464	0.12126	0.33344	0.66609	0.49914	0.75399	-0.11131	0.0483	0.75924	0.56556	0.37148	0.87937	0.29057	0.76819	-0.036422	0.088613	37016	0.31625	0.55612	0.96314	-0.96733	0.023555	20103	0.70667	-0.17364	0.80721	-13669	0.89039	-16429
ALG8	0.85748	-0.51911	0.15412	0.28326	0.61666	-0.64899	0.24335	-13176	0.35563	-0.54453	0.61574	0.15808	0.77434	0.54286	0.13268	0.46034	0.6935	-0.054625			0.35087	-0.5084	0.61839	0.8465	0.76406	-1098	0.38741	0.2514	0.20798	0.91916	0.045226	-0.39948
ALG9	0.96626	-0.22781	0.045655	0.52855	0.075783	15226	0.61723	0.50018	0.26564	13014	0.77035	-0.2008	0.25644	0.86324	0.97592	-11289	0.15411	-0.56565			0.98537	-17607	0.046316	29205	0.44374	-0.446	0.51156	-0.75857	0.53564	-0.10651	0.096569	26742
ALK	0.71992	-0.16199	0.58908	0.41242	0.57572	0.5755	0.61364	-0.27305	0.67781	-0.031926	0.89887	-0.92887	0.57273	-0.29315	0.76304	-12801	0.77392	-26718			0.66143	-0.63911	0.064981	15679	0.36677	0.69623	0.70261	-0.92676	0.57815	-18204	0.68651	-0.48376
ALKBH1	0.63632	0.14653	0.5847	0.45673			0.98164	-10827	0.75246	-0.47178	0.85327	-0.053545	0.45063	0.7289	0.61724	0.16357	0.070602	13758	0.28112	27082	0.3525	-0.078695	0.90423	-25064	0.15961	1145	0.28927	0.69745	0.54088	0.42543	0.4508	-14645
ALKBH2	0.87512	0.13081	0.97096	-0.65069	0.3025	0.8941	0.99968	-15186	0.98763	-1839	0.31373	0.28576	0.20313	13287	0.49928	-0.72788	0.88976	-0.88248	0.94496	-25998	0.54492	-0.37328	0.22537	-0.012378	0.99631	-25807	0.12657	0.75838	0.88587	-0.74665	0.68135	-1138
ALKBH3	0.69544	-0.21549	0.44269	-0.049815	0.45274	0.59257	0.096202	0.29462	0.57693	0.28264	0.99402	-11655	0.64525	-0.13144	0.37135	0.461	0.93335	-0.70878	0.19705	25943	0.13261	0.67106	0.20998	22762	0.90995	-0.92954	0.40943	0.62694	0.16464	0.54181	0.57918	-0.16778
ALKBH4	0.53281	0.70477	0.20962	0.77178			0.66805	-0.32199	0.27933	0.86771	0.68776	-0.1041	0.6218	0.73392	0.45736	0.46587	0.71857	0.15532	0.71566	-0.26507	0.058277	10287			0.63752	-24171	0.82615	-14908	0.032573	13834	0.048444	27632
ALKBH5	0.65743	0.81485	0.63651	-0.28404	0.39106	0.86602	0.04705	14028	0.55594	0.18909	0.82584	-0.62625	0.01574	18289	0.86357	0.063749			0.38237	19014	0.37477	0.78298	0.54972	-0.0030356	0.95224	-22562	0.4952	-0.21533	0.66021	0.48445	0.77522	-0.40384
ALKBH6	0.31919	0.86806	0.83267	-0.341	0.36746	-0.34739	0.095358	11746	0.056471	1146	0.92791	-0.27732	0.24801	0.24957	0.12757	0.9561	0.8453	-0.64382	0.30412	23646	0.51559	0.1646			0.11957	15275	0.73739	0.0080676	0.2133	15681	0.21667	19133
ALKBH7	0.85915	0.20054	0.54651	0.5315	0.50492	0.54581	0.81539	-0.10135	0.77304	-0.84789	0.12795	16537	0.20014	15313	0.70765	0.013281	0.77405	-0.23532	0.086067	0.087189	0.36129	-0.42644	0.4537	0.57993	0.18723	0.80241	0.48958	0.023863	0.56998	-0.38332	0.93662	-26866
ALKBH8	0.60184	0.30372	0.53687	0.13434	0.66346	-0.14499	0.46203	0.049827	0.41668	-0.028924	0.42586	0.33668	0.53023	-0.75377	0.91876	-0.51306	0.88163	-17822	0.93747	-19025	0.082343	0.94233	0.73387	-11919	0.82689	-1978	0.1939	0.16793	0.39488	0.37333	0.33562	12244
ALLC	0.84441	-0.77337	0.92721	-0.7566	0.28736	10659	0.01071	21151	0.25972	1255	0.51765	0.78423			0.26902	10493	0.89268	-14483			0.8059	-15454	0.34276	19006	0.39405	-0.96136	0.93129	-11547	0.75377	0.23612	0.56903	0.54866
ALMS1	0.74932	0.18903	0.40882	0.42644	0.60294	0.24502	0.87539	0.021263	0.17931	15743	0.56445	-0.045379			0.70053	-0.27926	0.90126	-0.36634	0.66068	0.10327	0.011275	17455	0.8158	-17653	0.61907	-13212	0.70066	-10456	0.036051	31573	0.74798	-0.20412
ALOX12	0.54996	-0.48975	0.80848	0.45513	0.75759	0.24997	0.75921	-14207	0.63114	-0.14303	0.77856	-0.41596	0.94195	-0.52813	0.4888	0.73881	0.88065	-12051	0.083408	39578	0.63286	-16627	0.34202	0.22143	0.93573	-19543	0.80668	0.31079	0.15273	12151	0.18981	18872
ALOX12B	0.90645	-0.74056	0.75581	-0.38969	0.4014	0.63884	0.96593	-10226	0.88009	0.34135	0.76431	0.68869	0.98028	-0.64048	0.45761	0.43694	0.24186	0.26049	0.047036	44665	0.99599	-22795	0.68808	0.74802	0.37712	0.69777	0.017175	21838	0.37227	0.92041	0.4776	10379
ALOX15	0.83324	-0.97631	0.66789	-0.45899	0.5831	-0.071882	0.87527	-0.4062	0.60976	-0.48965	1	-20355	0.82145	-13922	0.82675	-0.30223	0.53843	0.30336	0.86393	-16068	0.79296	-0.46816	0.22925	0.56357	0.24417	0.71868	0.18018	0.032353	0.99707	-26042	0.76312	-0.096563
ALOX15B	0.91232	-11277	0.67654	-0.19713	0.054286	0.65634	0.85194	-0.19977	0.80713	-0.12064	0.090825	16855	0.81518	-0.025147			0.23666	0.11795	0.61117	14604	0.57567	0.2309	0.87674	0.12228	0.071804	0.25284	0.98579	-28361	0.26625	1201	0.23778	16792
ALOX5	0.73267	0.014418	0.29472	-0.00080759	0.24336	0.1044	0.70697	0.49489	0.030329	19555	0.58347	0.062638	0.3887	10806	0.496	0.26149	0.80926	0.18997			0.22205	-0.71174	0.41185	-18385	0.55274	-0.67032	0.26326	-17809	0.32666	0.55535	0.98806	-22436
ALOX5AP	0.39351	0.66225	0.33193	0.20343	0.49658	-0.11313	0.64072	-0.38863	0.58568	0.71185	0.82989	0.22606	0.90161	-0.14436	0.87599	-0.72023	0.32973	-11123	0.28832	24305	0.058713	11093	0.83286	-0.30134	0.38249	-0.88699	0.32106	0.84578	0.67058	-10771	0.78801	0.44564
ALOXE3	0.25536	1546	0.6885	-0.21491			0.47595	-0.085597	0.47609	-0.81082	0.76047	-0.32369	0.15069	15177	0.20474	0.79527	0.79653	-17807			0.73676	-0.16622	0.45085	0.70347	0.29577	0.87556	0.92262	-0.90913	0.93046	-13714	0.55528	-21879
ALPI	0.17031	0.94378	0.063324	0.75645	0.85812	-0.83571	0.80112	-11913			0.82721	-0.17761	0.27802	0.90483	0.57537	0.64285	0.19634	0.84615	0.43471	0.90928	0.13711	1962-01-01			0.28077	0.97989	0.46526	-0.2132	0.084015	25295	0.39332	-0.37927
ALPK1	0.1304	0.58655	0.27958	10081	0.44486	0.56044	0.40987	0.73048	0.69469	0.49802	0.44995	0.60985	0.5426	10003	0.11309	13322	0.50309	0.4207	0.13882	3058	0.32719	10352			0.81387	-0.54952	0.77603	-0.46189	0.58664	0.44693	0.96012	-29888
ALPK2	0.25123	0.13995	0.34531	0.683	0.54462	-0.055451	0.31377	0.52551	0.84591	0.33443	0.73142	0.20044	0.95466	-12778	0.86594	-0.43839	0.67451	-0.53032	0.66964	0.63894	0.35553	-0.19022	0.52758	-0.25354	0.41135	0.67685	0.88244	-0.46055	0.60377	-0.33345	0.47812	0.60578
ALPK3	0.63148	-0.11479	0.75098	-0.19144	0.75738	-0.45755	0.099533	0.91233	0.59817	0.040262	0.94663	-0.82395	0.97592	-16046	0.22634	11219	0.51237	0.037911			0.83454	-0.060081			0.66468	-0.24065	0.79958	0.24304	0.58019	-0.44567	0.84638	-14816
ALPL	0.38363	0.4607	0.61621	-0.015993	0.0066286	30356	0.98204	-0.3255	0.8363	0.27541	0.95501	0.10486	0.45399	0.65793	0.41188	-0.84489	0.079021	16684	0.83947	-0.85541	0.59426	-0.5834	0.9633	-1075	0.37207	0.52366	0.24088	-13318	0.78861	-2599	0.95768	-29208
ALPP	0.58985	-0.24432	0.97076	-0.083468	0.56992	0.098743	0.9678	-0.27733	0.55001	0.90558	0.3976	0.24445	0.1102	12839	0.7751	0.26085	0.73053	-13916	0.63731	-0.73047	0.80801	-0.040402	0.47367	12563	0.34523	0.83797	0.5008	0.51404	0.81715	-0.80238	0.8547	-14724
ALPPL2	0.69921	0.54711	0.27867	0.51176	0.44834	-0.88377	0.77189	0.23345	0.13169	13364	0.14275	11449	0.63109	0.51022	0.97303	-20047	0.56833	-0.99674	0.98352	-17103	0.1623	0.91667	0.94328	-13068	0.71082	-18077	0.93538	-0.58593	0.89454	-30277	0.40214	0.27997
ALS2	0.32187	0.94619	0.095325	0.42472	0.81217	-0.66157	0.54257	0.1834	0.93212	-0.9499	0.54134	0.27121	0.92395	-0.61316	0.5334	0.094943	0.45611	-0.40586	0.51281	10885	0.66817	-0.77432	0.36746	-0.58749	0.6659	0.38113	0.68825	-15286	0.399	-15678	0.90714	-24142
ALS2CL	0.67358	0.11326	0.11307	0.55064	0.83391	0.014082	0.52707	-0.32526	0.95634	-0.82649	0.70174	0.22542	0.28825	0.69687	0.36792	0.88817	0.52189	-0.053685			0.16555	15044	0.66257	-0.73106	0.75017	-18584	0.69043	-0.56608	0.19358	16878	0.86603	-20827
ALS2CR11	0.45614	0.69585	0.12282	0.87235	0.28051	0.76061	0.59269	0.2451	0.17843	0.6487	0.016136	20072	0.12454	0.91239	0.81991	-0.79641	0.80214	-0.29785			0.1597	1067	0.4477	0.63195	0.29262	0.57013	0.12344	0.59478	0.72329	-0.32716	0.28873	0.99238
ALS2CR12	0.96261	-0.046015	0.26549	0.52315	0.47989	-0.25729	0.89796	-0.4216	0.085535	19686	0.71721	-0.31219	0.295	13541	0.31389	0.99692	0.48209	0.10552	0.91702	-18406	0.062379	0.19976			0.14963	11337	0.89915	0.0041507	0.25809	0.70625	0.65565	-0.69926
ALX1	0.5619	0.12782	0.39998	-0.37476	0.46023	0.38058	0.82944	-0.3388	0.79292	-0.15341	0.41965	0.41584	0.8567	-0.66605	0.36236	0.67038	0.98076	-19011			0.30052	-18294	0.97227	-21519	0.73934	-0.18912	0.085228	0.98373	0.96747	-19641	0.44194	0.56648
ALX3	0.65759	0.061516	0.78336	0.30478	0.92153	-0.82503	0.82532	-0.15126	0.93906	-0.6395	0.32817	0.95938	0.97701	-0.8226	0.87745	-0.12444	0.62771	-0.74378			0.15299	-0.37917	0.70173	-18225	0.3892	0.39456	0.40414	0.65271	0.89632	-13726	0.97494	-22498
ALX4			0.2812	0.75128	0.37599	0.82506	0.71458	-0.36605	0.24264	12815	0.46758	0.36139	0.7353	0.52658	0.061974	13421	0.91903	-0.8216	0.022354	49202	0.17018	0.80104	0.19312	19847	0.12443	0.79163	0.78449	-0.039385	0.84788	-21786	0.9727	-20106
ALYREF	0.55343	0.41003			0.060771	24161	0.5713	-0.15872	0.65672	0.23921	0.68454	0.66363	0.097545	20243	0.53818	0.45619	0.1931	1067	0.20012	31131	0.39938	0.61958	0.14021	31294	0.7816	-10093	0.46786	-0.20592	0.56199	-0.34004	0.42341	0.34003
AMACR			0.61415	0.51904	0.41834	0.70841	0.68731	0.030883			0.085864	15739	0.51988	0.2642			0.065279	12567			0.27958	0.95444	0.90629	-25205	0.20326	14762	0.072808	0.55882	0.080965	17863
AMBN	0.98544	-0.63402	0.5881	0.25147	0.92486	0.059406	0.0068294	11268	0.61045	0.40351	0.23475	0.88953	0.39727	0.54778	0.51533	0.25586	0.064067	0.39788	0.46948	15043	0.9224	-16073	0.5223	-0.51299	0.93982	-0.29607	0.2699	0.40075	0.0053668	30033	0.087559	15392
AMBP	0.36174	-0.23378	0.51974	0.12602	0.4656	0.27132	0.96748	-0.66935	0.030787	16322	0.49757	0.24785	0.43845	0.60755	0.17406	0.94627	0.3043	0.73349	0.97888	-17973	0.68145	0.025868	0.085197	37337	0.28215	0.6284	0.84401	-0.78321	0.19469	16024	0.30607	14375
AMBRA1	0.011042	19485	0.22	19567	0.11238	19013	0.97284	-0.39098	0.056919	14221	0.058653	17074	0.31577	10427	0.52377	0.77524	0.0025883	20146	0.7367	-0.36806	0.88366	-0.25743	0.15106	20344	0.36157	0.83564	0.50708	0.2314	0.34232	0.2644	0.34582	0.54055
AMD1	0.52763	0.48895	0.0052214	0.44895	0.90132	-0.83123	0.86014	-0.61868	0.021631	14529	0.69018	-0.48432	0.66138	-0.29356	0.97306	-0.53726	0.54147	0.4683			0.60582	-0.64877	0.50593	0.24937	0.41327	0.54028	0.46844	0.058215	0.15995	11379	0.86737	-11205
AMDHD1	0.4345	0.51124	0.88465	0.20572	0.66896	0.21468	0.10609	0.82211	0.31404	10489	0.61571	0.16389	0.45153	0.80341	0.7127	0.46342	0.77291	0.047457	0.86323	-15331	0.43169	0.068285	0.56216	-0.082965	0.49757	-0.16696	0.41604	0.38854	0.21498	16425	0.2351	14895
AMDHD2	0.88241	-0.092924	0.97145	-0.47965	0.45163	0.20781	0.45839	0.50461	0.38556	10165	0.44045	0.29869	0.27409	0.2997	0.18957	0.9074	0.44178	0.2325	0.83603	-0.74577	0.50207	0.19891	0.39822	0.013144	0.6506	-0.029193	0.53669	0.14463	0.44944	-13217	0.13036	0.27872
AMELX	0.76734	0.40599	0.87711	-0.31963	0.3437	0.87552	0.9307	0.059119	0.51396	0.17129	0.21852	-0.20844	0.69297	0.6064	0.054955	11186	0.18073	12304	0.77878	-0.7301	0.22692	12019	0.70545	-0.82637	0.055123	22823	0.57384	0.37887	0.14449	16925	0.043362	28905
AMELY	0.74643	0.54655	0.12896	0.040884	0.18865	14057	0.53879	0.16112	0.38958	10992	0.54022	0.24999	0.2728	13929	0.47291	0.020507	0.95292	-15498			0.40878	0.075216	0.62991	-0.52041	0.20844	-15786	0.062755	-10811	0.97732	-27389	0.019644	10668
AMER2	0.35893	0.99973	0.54348	0.60137	0.69908	-0.045009	0.97098	-0.32302	0.66827	0.23468	0.20484	0.75457	0.815	0.43138	0.20746	0.89443	0.17098	0.98958			0.029114	21943			0.26258	0.86974	0.50103	0.21044	0.01758	0.9835	0.26668	14826
AMFR	0.15	1343	0.19584	11851	0.030419	14398	0.37087	0.036745	0.56706	0.30829	0.61302	-0.40035	0.61947	0.71322	0.44174	-0.44048	0.58215	-0.0476			0.74996	-0.76672	0.76815	-12522	0.21597	0.62418	0.19346	12262	0.012517	16985	0.21478	15755
AMH	0.36864	0.9864	0.27454	0.86481	0.47714	0.53736	0.38814	0.013451	0.17079	1845	0.087649	14241	0.91112	-10527	0.74935	0.092785	0.32042	0.67435	0.52906	0.98059	0.77759	0.39507	0.57349	0.74457	0.079886	15589	0.611	-0.94042	0.73525	-10768	0.97336	-21531
AMHR2	0.97769	-0.54361	0.99528	-0.4168	0.744	0.1766	0.948	-0.73865	0.50288	-0.68915	0.87068	-0.20612	0.69854	0.05698	0.99287	-0.60044	0.77952	-0.60007	0.16971	3161	0.82486	-0.48906	0.93371	-32878	0.71485	-0.32309	0.6542	-0.46297	0.52011	0.22093	0.77042	-0.37064
AMICA1	0.84505	-0.28593	0.67633	0.14505	0.40636	0.77152	0.36363	-0.22065	0.21779	12356	0.90797	-0.13705	0.1858	14386	0.033575	17688	0.58095	0.45524	0.16734	32547	0.54749	0.26169	0.016361	50344	0.65017	-0.81928	0.3171	0.10147	0.74754	-13903	0.11822	21754
AMIGO1	0.66585	0.62779	0.039542	1616	0.25306	11165	0.25686	0.38054	0.94215	-13731	0.098827	16025	0.020696	22402	0.84797	-0.31184	0.33308	-0.094506	0.69673	-0.07916	0.63834	0.23384	0.080254	38017	0.7576	-0.55387	0.96068	-19778	0.94603	-13104	0.62032	-0.50491
AMIGO2	0.00096503	28534	0.8514	-0.01237	0.27073	13088	0.093537	11296	0.86705	-0.013119	0.29871	0.12348	0.92611	-0.65849	0.2377	0.35874	0.4877	0.29069	0.24809	27319	0.17739	0.3354			0.23322	12615	0.57557	-10923	0.6763	-0.086899	0.81715	-0.61319
AMIGO3	0.051328	1935-01-01	0.013321	11598	0.41201	0.80522	0.61587	0.45694	0.80662	-0.23364	0.62844	0.50525			0.77615	-0.53196	0.9858	-16798	0.1526	34032	0.78275	-0.65029	0.49939	0.32662	0.12094	19384	0.67107	0.25368	0.37563	0.54178	0.079521	29687
AMMECR1					0.28815	0.40301	0.19072	11019	0.79742	-0.63046	0.75369	-0.27966			0.28042	-0.53542	0.27986	0.77062	0.42873	11473	0.01193	2064			0.8094	-17889	0.85241	-19894	0.22491	14773	0.51056	-0.46557
AMMECR1L	0.27405	1378	0.5333	-0.25139	0.19905	10825	0.62756	-0.3349	0.77676	0.1201	0.37951	11289	0.74016	-0.1276	0.2254	12604	0.21408	-11934			0.4599	0.042558	0.74695	-16535	0.78639	-0.53593	0.20518	-0.25783
AMN	0.5789	0.39187	0.9422	-0.44525	0.70365	0.64665	0.76476	-0.057608	0.98593	-10724	0.88558	-0.8292	0.384	0.018949	0.71989	-0.77461	0.7067	-0.37832	0.53784	14155	0.901	-14275	0.36524	14455	0.26508	-28954	0.82086	-20023	0.99049	-28975	0.61053	-32518
AMN1	0.68804	0.12207	0.13506	0.98679	0.34024	0.94054	0.95693	-0.9083	0.051991	23772	0.16339	0.24641	0.39858	0.5324	0.16699	15312	0.099142	0.12519	0.081019	39999	0.087982	19003	0.33157	15092	0.26605	0.65867	0.20519	14079			0.048854	25345
AMOT	0.017763	19791	0.35691	0.2887	0.099763	18906	0.96885	0.06199	0.59062	0.49984	0.83423	-0.050386	0.43673	-10368	0.89713	-0.51186	0.76434	-12007			0.50361	-15201	0.36997	13697	0.98836	-15432	0.7656	-0.85204	0.52512	-0.89562	0.68288	0.4788
AMOTL1	0.10213	11705	0.67874	0.41313	0.98984	-10325	0.096093	0.58908	0.46964	0.80956	0.23248	1258	0.58975	0.1528	0.70644	0.3493	0.58531	-0.53996			0.64662	-0.16845	0.37298	12265	0.71525	-0.53242	0.12114	14658	0.92405	-0.4919	0.83429	-18283
AMOTL2	0.76953	0.30961	0.58036	-0.16772	0.89046	-0.1929	0.069971	12189	0.79549	-0.63408	0.41788	0.13253	0.0014948	30132	0.72678	0.43525	0.39526	0.56985	0.053746	43688	0.79569	0.24584	0.73799	-12203	0.84654	-10797	0.56129	0.0040548	0.059831	10278	0.31234	-23248
AMPD1	0.83653	-0.22005	0.028312	0.52391	0.73101	0.59189	0.02725	11893	0.49428	0.3913	0.19966	0.042106	0.51821	-0.32232	0.24949	10902	0.98081	-14635	0.57776	15045	0.13625	11597			0.77022	-0.10173	0.5615	-0.16611	0.91268	-12902	0.5814	0.46821
AMPD2	0.53108	0.33512	0.39181	0.51441	0.96349	-0.74596	0.97971	-0.099292	0.7124	-0.22586	0.011533	17292	0.15745	0.50162	0.84946	-0.025803	0.50584	0.28166	0.28466	19779	0.53898	-0.89789	0.21912	22934	0.0419	18402	0.16182	10631	0.12761	-0.40308	0.46167	-0.30446
AMPD3	0.053475	0.99826	0.7418	-0.43158	0.50143	0.1281	0.46654	-0.10447	0.73939	-0.0536	0.23349	10999	0.32208	0.89481	0.48563	0.51602	0.589	-0.76869			0.021656	21798			0.20725	0.75679	0.5789	-0.44374	0.81627	0.33702	0.1225	15586
AMPH	0.10669	1353	0.75821	0.47542	0.14893	1206	0.85723	0.090187	0.68173	0.5341	0.997	-0.45231	0.95181	-0.83227	0.3762	-0.17454	0.50242	-0.84146	0.54707	0.88553	0.22077	0.21852	0.66893	-0.75938	0.44054	-11011	0.77699	0.24708	0.66812	-12246	0.97076	-25399
AMT	0.33799	0.51956	0.79671	-0.25647	0.3703	0.85753	0.51029	-0.61323	0.90176	-0.51616	0.7062	-0.51376	0.94727	-12678	0.71897	-0.26168	0.44921	0.2568			0.35603	0.35329	0.1172	35215	0.6821	-0.11784	0.33909	-0.35274	0.59303	-0.0061906	0.88369	-0.72322
AMTN	0.031607	18323	0.58706	0.09858	0.38711	-0.30445	0.60929	0.26424	0.36344	0.40333	0.38247	0.00367	0.53104	0.64245	0.032447	16387	0.22365	0.79073	0.64268	0.58448	0.57229	0.17907	0.54027	0.031083	0.44428	-0.85159	0.50409	-0.28629	0.32902	0.89219	0.4331	0.78539
AMY2A	0.31495	2014-01-01	0.076576	2022-02-01	0.73706	0.18114	0.57217	0.49081	0.3322	0.83167	0.1955	0.95351	0.7608	0.47231	0.36534	0.25358	0.71961	0.34643			0.26199	0.26288			0.016276	12869	0.88616	-29624	0.55232	0.29218	0.99372	-24794
AMY2B	0.34875	1164	0.079636	13776	0.77219	-0.43714	0.5346	0.15586			0.44532	0.30239	0.89393	-0.93216	0.75919	-0.13194	0.3682	0.65499	0.4448	15794	0.62309	-0.73961			0.46828	-0.32826	0.40025	0.46346	0.17122	-15786	0.59706	-0.37535
AMZ1	0.20896	11771	0.53134	0.26673	0.96954	-14822	0.89659	-0.38414	0.88599	-0.23917	0.75897	-0.20895	0.030729	-0.51682	0.44196	0.58099	0.99101	-17653	0.45984	16911	0.84373	-0.90984			0.31991	0.5234	0.85259	-0.25424	0.010794	17984	0.33595	12191
AMZ2	0.94845	-0.62023	0.56212	0.62499	0.47678	0.30859	0.50641	-0.066471	0.23086	14203	0.99737	-0.8717	0.40633	10618	0.42899	0.72277	0.14083	0.085712			0.58482	0.25192	0.074202	38198	0.48343	-11895	0.15049	16059	0.81776	-0.38112	0.3088	0.88989
ANAPC1	0.55787	0.69641	0.78302	-0.68851	0.87212	0.24526	0.35711	0.25517	0.1877	11569			0.159	12428	0.68584	0.44003	0.98497	-16794			0.88236	-0.0017429			0.66612	-11408	0.65107	-0.75127	0.7712	-0.48107	0.57495	-0.19185
ANAPC10	0.71306	0.26181	0.12479	1058	0.24835	0.99302	0.30292	0.30808	0.44313	0.96729	0.85883	-0.30428	0.13302	19987	0.12061	1371	0.608	-0.19906	0.93145	-2353	0.49336	-25031	0.74871	-10849	0.78772	-18442	0.66937	0.37461	0.5197	-15799	0.0059612	38383
ANAPC11	0.94107	-0.089738	0.36703	0.30838	0.22483	0.76292	0.48597	0.094539	0.90309	-0.27821	0.52032	0.3928	0.1242	18249	0.25552	0.9742	0.40242	0.23646	0.63394	0.33237	0.89718	-0.047667			0.19017	0.62733	0.29779	0.7259	0.7659	-0.25138	0.30474	-0.42833
ANAPC13	0.0065933	20639	0.037656	0.93538	0.94726	-0.6183	0.091588	0.95416	0.21449	0.44182	0.37864	0.87026	0.074347	2328	0.1752	14066	0.092966	0.41453			0.28991	0.91007	0.63284	0.079213	0.53093	0.41621	0.31945	0.27681	0.44341	0.63913	0.29997	12313
ANAPC15	0.89766	-10404	0.76587	-0.52772	0.36079	-0.18645	0.47334	-0.0077825	0.077643	15057	0.97732	-10042	0.54822	0.98146	0.13947	-0.44125	0.80352	-15695					0.28813	17266	0.21668	-0.10597	0.42726	0.29641	0.71312	-14167	0.54526	-0.038656
ANAPC16	0.82858	0.46353	0.92352	-0.55872	0.866	0.0051851	0.70543	-0.66839	0.1203	12872	0.57464	-0.24487	0.045893	19362	0.5591	0.61065	0.41002	-15145			0.37448	0.41285			0.64553	0.19897	0.092848	0.77095	0.25313	-17009	0.51417	-0.072946
ANAPC2	0.86115	-0.57472	0.77172	-0.10079	0.49094	-0.11679	0.22715	0.39464	0.47399	0.58286	0.73698	-0.28739	0.12263	16767	0.071315	13581	0.44869	-0.43559			0.89136	-0.98845			0.21509	0.098614	0.50279	0.14261	0.92415	-16297	0.37146	0.98942
ANAPC4	0.63318	0.85637	0.28001	0.71708	0.93675	-0.5402	0.18721	0.14585	0.10232	-0.42377			0.91088	-0.24989	0.07812	12813	0.34488	0.7738			0.036934	12294			0.45085	-0.64108	0.81727	-13877	0.60779	-16626	0.17583	12307
ANAPC5	0.21411	14505	0.0014271	12262	0.052336	22825	0.2462	0.49083	0.69944	0.42797	0.036348	17489	0.68946	-0.21911	0.22417	0.6031	0.12179	0.57875			0.97879	-16597	0.82982	-15659	0.78511	-18794	0.70503	-0.27718	0.36116	0.98158	0.38606	12053
ANAPC7	0.88462	-0.82552	0.75011	0.47578	0.38691	-0.041128	0.38162	0.36285	0.99428	-0.66312	0.24512	-0.23635	0.74205	0.22214	0.45948	-0.083633	0.85093	-11316			0.27265	0.3524	0.72234	-15739	0.69987	0.069706	0.71608	-10027	0.86489	-13207	0.23109	10224
ANG	0.30444	0.94249	0.79055	0.50677	0.31162	10445	0.27159	0.45388	0.46675	0.22539	0.73427	-0.44479	0.25625	14572	0.46602	0.28497	0.56668	-0.61218	0.90375	-19967	0.65869	-0.89361			0.78315	-0.88813	0.95465	-18488	0.59926	-0.32317	0.42379	1194
ANGEL1	0.34164	0.78935	0.030527	17982	0.68526	0.66677	0.16758	0.58042	0.81008	-0.087489	0.019248	21989	0.40207	0.40368	0.86585	0.0225	0.80764	-0.56267			0.95226	-0.74576	0.13784	30684	0.40971	0.75597	0.091086	0.19713	0.81049	-17851	0.27051	0.59375
ANGEL2	0.31099	0.84563	0.083593	0.78171	0.042457	23419	0.47512	0.048943	0.025659	21654	0.14011	11725			0.059497	-0.52762	0.42992	-0.92247			0.32112	0.8554			0.63692	-0.79733	0.73761	-0.74262	0.38558	0.92464	0.23931	15548
ANGPT1	0.6707	0.28385	0.48623	0.20984	0.11397	15458	0.62706	0.35932	0.64595	0.69002	0.95081	-13048	0.45861	0.62623	0.70139	0.47408	0.41466	0.14241	0.82859	-0.07484	0.79447	0.30566	0.97623	-14677	0.75143	-0.99521	0.89657	-0.85421	0.19275	15961	0.66247	-0.79174
ANGPT2	0.176	15282	0.81149	0.072314	0.29372	10074	0.15565	10324	0.32114	0.41454	0.43775	0.47459	0.12851	16478	0.35739	0.79388	0.80873	-0.95247	0.27183	2568	0.23076	-0.14533	0.11832	25846	0.98186	-26864	0.17666	13225	0.76021	-0.18088	0.85796	-0.84282
ANGPT4	0.9733	-0.26934	0.41676	0.27133	0.57471	-0.29503	0.54137	-0.39643	0.73595	0.13102	0.51762	-0.24338			0.17879	0.50278	0.22097	0.97881	0.59091	12233	0.44217	-0.8042	0.0027301	34514	0.82368	-0.52456	0.21841	0.77307	0.44595	-17862	0.67075	-0.93014
ANGPTL1	0.028993	20243	0.39288	0.35926	0.75002	0.29085	0.93338	-0.65895			0.4846	-0.58549	0.72595	0.16755	0.79446	-0.00059821	0.5214	0.14674	0.84575	-0.38818	0.58626	0.1013	0.63553	-0.28982	0.56056	0.53773	0.046744	13524	0.38455	0.81425	0.95136	-2814
ANGPTL2	0.98982	-0.65802	0.6869	-0.42126	0.90675	-0.35519	0.96835	-0.70065	0.96466	-0.75462	0.17273	13259	0.29183	0.78168	0.74457	-0.084511	0.93329	-13411	0.95445	-27076	0.33658	0.6844	0.32407	0.24505	0.62201	-0.026092	0.16589	13059	0.66522	0.13716	0.35252	0.6352
ANGPTL3	0.18537	11863	0.88896	0.36239	0.66763	-0.51781	0.67896	0.074714	0.67569	0.31827	0.53548	-0.080364	0.8059	-0.14881	0.086275	12298	0.04909	10577	0.28279	1946-02-01	0.49789	-0.33539	0.61446	-0.41591	0.79624	-13996	0.39721	0.35932	0.52091	-13376	0.16823	0.83601
ANGPTL4	0.8719	0.26974	0.91354	-0.39047	0.85053	0.039983	0.0082975	11515	0.11554	16108	0.29261	0.64517	0.21526	13424	0.32001	0.76968	0.84694	-0.12242			0.64385	-0.037025	0.90267	-24889	0.95599	-0.89904	0.49749	-0.6482	0.94361	-10723	0.74273	0.26406
ANGPTL5	0.45645	0.43038	0.89455	-0.12877	0.33408	0.60892	0.55461	0.082079	0.56389	0.20177	0.080014	19679	0.69798	-0.19214	0.86944	-0.47336	0.76479	-0.089362			0.35054	0.67169	0.98222	-29086	0.32467	0.93345	0.72621	0.51927	0.21632	14723	0.079426	21408
ANGPTL6	0.73601	0.76713	0.85407	-0.046597	0.67486	0.0040594	0.0040993	15556	0.49757	0.40645	0.011274	15801	0.70036	0.63309	0.083981	11751	0.18227	-0.75338			0.28304	10298	0.30848	0.087477	0.045696	19422	0.78978	-0.145	0.50248	-27845	0.029295	24515
ANGPTL7	0.63475	0.27135	0.44801	0.69676	0.48133	0.36533	0.82846	-0.53563	0.85598	0.48761	0.22477	12792	0.12989	19377	0.82815	-0.4829	0.074183	0.0063145			0.10907	0.88757	0.93304	-18346	0.18816	11561	0.56835	-0.34301	0.93383	-20736	0.94623	-11759
ANHX	0.77085	-0.4248	0.94036	-0.060862	0.8144	-0.57857	0.60733	-0.038879	0.44789	0.96206	0.21433	11756	0.93606	-0.55607	0.85366	-0.86355	0.018393	15878	0.2996	23574	0.21871	0.88786	0.58182	-0.21846	0.048547	0.35562	0.75018	0.28201	0.48828	0.66429	0.97149	-20329
ANK1	0.43965	0.3656	0.80507	-0.35005	0.41486	-0.066035	0.43177	0.38311	0.87968	-0.90558	0.064834	22712	0.78931	-0.47429	0.81005	-0.46988	0.34293	0.21368	0.88222	-17536	0.40725	0.31612			0.64737	-0.88187	0.86919	-1419	0.8877	-0.25254	0.94275	-1967
ANK2	0.39649	0.77797	0.69667	-0.098012	0.74114	-0.12394	0.41864	0.41877	0.23229	11106	0.75019	0.36486	0.31517	0.73677	0.82462	-0.54445	0.24865	-15193	0.78613	-0.79529	0.84454	-19773			0.71136	-0.25989	0.050659	1474	0.54477	0.48322	0.85031	-17684
ANK3	0.072193	12239	0.78927	0.15755	0.22818	10744	0.90646	-0.30105	0.15311	15089	0.69843	-0.66106	0.51354	-0.77764	0.3746	0.1858	0.3094	0.14953	0.53753	16418	0.46783	-1144	0.7531	-0.3697	0.58837	-0.17575	0.29932	0.14181	0.016808	27553	0.32261	13137
ANKAR	0.25874	0.98096	0.39538	0.59149	0.86345	-11353	0.47228	0.25321	0.94064	-0.19677	0.4216	0.40811	0.69705	-0.43468	0.9482	-0.6787	0.97833	-12979	0.86074	-25682	0.836	-0.75515	0.86473	-0.398	0.37813	-0.3013	0.99634	-17546	0.3625	0.22391	0.64929	-0.66636
ANKDD1A	0.87682	-0.94281	0.29338	-0.27141	0.2898	0.91509	0.86241	-0.13495	0.7456	-0.13716	0.13656	-0.16509	0.53586	0.19332	0.92556	0.24374	0.95935	-10365	0.62751	0.39286	0.74909	-0.62419	0.10675	23958	0.021013	11734	0.55501	-0.37907	0.37994	0.53451	0.78971	-15235
ANKDD1B	0.20561	13278	0.40518	0.22804	0.61061	0.24554	0.6646	0.34207	0.9593	-0.79061	0.40612	0.38123	0.80006	0.15912	0.41817	-0.56968	0.32953	0.15429	0.39892	18246	0.79767	-0.77989			0.73714	-0.9104	0.47484	0.28205	0.86507	-0.18667	0.090222	19009
ANKFN1	0.56663	0.91151	0.11879	10785	0.12226	1003	0.16587	0.56511	0.48487	0.47751	0.9271	0.3139	0.71569	-0.24545	0.5559	0.53609	0.33977	0.25707			0.82052	-0.28344			0.68344	-10382	0.85613	-0.73332	0.46729	0.14572	0.21652	-1.15
ANKFY1	0.25264	0.82251	0.58982	-0.82656	0.27966	10048	0.087359	10944	0.0074275	22885	0.69242	-0.18929	0.63472	1005	0.087118	15797	0.96199	-13911	0.52156	0.13935	0.57669	0.46442	0.042462	26434	0.925	-25835	0.37346	0.29068	0.23636	13896	0.94217	-1524
ANKH	0.95005	0.035929	0.44945	0.76358			0.66057	-0.51805	0.14182	0.78444	0.8972	0.23928	0.14848	13673	0.32166	0.11779	0.85183	0.051271	0.37595	24367	0.73322	-11832	0.70135	0.29226	0.70389	-20122	0.36087	0.70098	0.14355	0.89633	0.32004	13753
ANKHD1	0.0088642	23092	0.31154	0.77196	0.84737	-0.5341	0.55297	-0.027624	0.36946	0.82212	0.36178	0.62465	0.6217	0.67339	0.61274	0.69135	0.46871	0.036847			0.54452	-0.97857	0.12118	33412	0.22915	-0.58379	0.21148	10161	0.32378	0.38795	0.45734	-0.26505
ANKHD1-EIF4EBP3	0.52453	0.26674	0.64155	0.51829	0.27506	0.60843	0.73707	0.28082	0.62279	-1717	0.064431	0.94465	0.2225	13553	0.92358	-0.7184	0.91944	-0.76851	0.026235	29689	0.84155	-14709	0.97968	-34676	0.3927	0.70252	0.3394	0.0025014			0.61572	0.60561
ANKIB1	0.80084	-0.64841	0.5456	-0.17815	0.56111	0.16857	0.47205	0.35513	0.86056	-0.86392	0.39475	0.049813	0.62394	-0.84853	0.2968	-0.021684	0.59957	0.17151	0.99303	-32805	0.88384	-0.58075	0.90802	-1.22	0.8366	-0.76148	0.95385	-0.045594	0.22681	12427	0.17026	16882
ANKK1	0.062417	13945	0.99565	-12163	0.58442	-0.03378	0.070952	14253	0.92277	-11663	0.50304	0.81018	0.079388	11318	0.2805	-0.0097326	0.41049	0.23922	0.97633	-1568	0.75931	-0.11544	0.81154	-17088	0.60065	0.14175	0.49393	-0.49887	0.067295	20443
ANKLE1	0.39193	0.42399	0.041044	13779	0.04274	16987	0.86972	-0.54824	0.45268	-0.22721	0.91051	-0.31525	0.78807	-0.072652	0.054328	22926	0.47147	-0.64178	0.62041	13901	0.33688	-12606	0.69375	-0.92295	0.62662	-12188	0.28431	0.15457	0.86774	0.20374	0.23274	15434
ANKLE2	0.44487	-0.42179	0.44264	0.40285	0.66856	-0.62954	0.43396	0.18127	0.88954	-10473	0.8405	-0.69863	0.8403	0.44593	0.51086	0.55224	0.88517	-1044			0.024391	19057	0.047595	23284	0.25015	-0.21523	0.88965	-20111	0.17742	0.14845	0.56208	0.044667
ANKMY1	0.43596	0.80652	0.8282	-0.39686	0.046058	1873	0.30243	0.47742	0.92974	-0.46747	0.25284	10378	0.19423	12994	0.80677	-0.17645	0.77996	-0.35692	0.54185	0.95979	0.75049	-0.39979	0.76308	-0.45007	0.83358	-19057	0.74836	0.20895	0.43175	0.68766	0.0052008	-13654
ANKMY2	0.70646	-0.18984	0.98327	-0.33872	0.56489	0.64643	0.64295	0.26674	0.38937	11436	0.30217	0.63451	0.75186	-0.34705	0.10072	18679	0.51151	-16313	0.74364	0.42374	0.91202	-22107			0.8482	-16263	0.2879	0.99872	0.51692	0.69322
ANKRA2	0.7986	-0.26643	0.93495	-0.29631	0.22387	-12087	0.94118	-0.23199	0.65317	-0.20996	0.60837	0.28768	0.017629	11971	0.75114	-0.55809	0.69062	0.39912	0.79303	-10097	0.025584	19199	0.57417	-0.017813	0.16735	12708	0.11455	0.73707	0.5874	-0.082495	0.53426	0.4925
ANKRD1	0.93169	0.012837	0.34955	0.39029	0.38057	0.85029	0.89106	-0.12378	0.69296	0.42477	0.26021	11645	0.95252	-0.64708	0.74477	-0.30153	0.68862	-0.59315	0.95878	-10954	0.30158	0.39453			0.56414	-18331	0.56294	-0.042088	0.79667	-0.0061755	0.021697	11583
ANKRD10	0.47813	-0.017492	0.79351	-0.3657	0.73579	0.36945	0.62182	0.05706	0.5018	0.63433	0.7578	0.072048	0.37592	-0.34739	0.64386	-0.90512	0.68472	-0.48561	0.92356	-0.09052	0.58881	0.40874	0.55742	0.80836	0.96206	-0.33447	0.58562	0.27069	0.33285	0.95932	0.60577	0.4097
ANKRD11	0.48231	0.66602	0.19475	0.95024	0.4924	0.93314	0.079313	1142	0.62185	0.062086	0.69889	0.18657	0.17882	11988	0.073172	10221	0.96335	-0.51541			0.12502	0.14757	0.4673	0.53336	0.54433	0.59307	0.36734	0.53387			0.40661	-0.037823
ANKRD12	0.7075	0.37572	0.74522	-0.33595	0.4367	0.69319	0.46739	0.16729	0.35814	0.28127	0.54146	0.2594	0.12314	0.75111	0.16645	13505	0.14197	0.96656	0.14244	35008	0.021651	1608			0.26211	12657	0.097914	-12595	0.78566	-16405	0.13743	0.58625
ANKRD13A	0.7692	-0.56207	0.39174	0.59891	0.107	18079	0.43717	-0.3303	0.72551	0.45034	0.66097	0.79277			0.11785	-0.083488	0.52601	0.39988			0.9778	-13497			0.23675	-0.54348	0.97588	-19434	0.52442	-0.15602	0.92462	-25482
ANKRD13B	0.81246	-0.4583	0.055374	10029	0.38891	0.112	0.41496	0.5421	0.31114	0.34434	0.83612	0.19973	0.43915	0.96512	0.071087	-0.54699	0.51335	-0.73527			0.071125	20035			0.59004	0.50579	0.34371	0.42631	0.86919	-0.50351	0.23089	18095
ANKRD13C	0.93604	-0.0078287	0.22049	0.048123	0.7965	0.056716	0.3254	0.71338	0.85151	-0.38192	0.69177	-0.028148	0.82097	0.56409	0.79726	0.41225	0.55611	-17089	0.91376	-0.42911	0.9255	-0.72324	0.2965	16206	0.3322	0.93723	0.24629	0.54129	0.47127	0.016917	0.37153	11568
ANKRD13D			0.69105	0.18749	0.34292	0.63554	0.61236	-0.28576	0.59336	0.71432	0.90041	-0.071005	0.83477	0.0049069	0.72363	0.063149	0.50841	0.14937	0.80568	-0.96283	0.76407	0.33161			0.47561	0.21863	0.93629	-1453	0.57933	0.51799	0.41733	0.60244
ANKRD16	0.9788	-11361	0.25416	0.41329	0.86518	0.19664	0.39514	0.59332	0.90663	-0.88117	0.79548	-0.076779	0.75181	-0.41671	0.38864	0.074985	0.7444	-0.8348			0.27947	0.8111	0.42832	0.54241	0.068899	1515	0.87232	-11953	0.68623	-0.50426	0.73252	-0.48745
ANKRD17	0.79784	-0.74049	0.33828	-0.83269	0.1778	16037	0.98113	-0.87262	0.37615	0.34339	0.32908	0.44894	0.60558	0.38857	0.75077	0.15769	0.94763	-13635			0.11259	0.96181	0.75042	-15462	0.19985	15013	0.68376	-0.74364	0.38925	-10135	0.85981	-20557
ANKRD18A	0.48216	0.74174	0.87741	0.22729	0.61274	0.56302	0.67285	0.42876	0.66091	-0.044669	0.92628	-0.17187	0.51907	0.53813	0.17026	0.032145	0.73336	-0.44803			0.57576	0.011754	0.37523	10565	0.10762	14062	0.59754	-0.80563	0.33383	0.84999	0.98968	-19684
ANKRD18B	0.68557	-0.23283	0.6658	0.01889	0.56274	-0.031007	0.57112	0.17454	0.54409	-0.31815	0.19966	-0.12132	0.81685	-0.74135	0.31887	0.79612	0.50008	-0.82611	0.020556	49541	0.53709	-0.58812	0.48728	0.38119	0.29135	11153	0.37644	0.98924	0.93533	-22073	0.78366	-0.062964
ANKRD2	0.4211	-0.6264	0.51089	-0.12258	0.95972	-0.53361	0.32896	0.46371	0.17204	0.32137	0.34894	0.42275	0.96813	-0.60339			0.78705	0.051168	0.26291	0.53777	0.363	-10839	0.059337	41931	0.60275	-0.15131	0.2122	-0.30876	0.5578	0.62487	0.1961	19364
ANKRD22	0.87901	-0.27071	0.49364	0.23841	0.95412	-0.69415	0.88566	-0.016265	0.34721	11569	0.85876	-0.76988	0.18909	0.55116	0.34809	0.75122	0.37337	0.63213	0.70519	11892	0.4713	-10602	0.70416	-0.98658	0.72878	0.17117	0.23602	0.17201	0.34098	0.89779	0.60681	0.052319
ANKRD23	0.51933	0.11411	0.88107	0.048967	0.083402	0.22638	0.84939	-0.37318	0.31839	0.7465	0.59326	0.35016	0.22031	10322	0.8948	0.12298	0.51946	0.44452			0.93133	-14898			0.63442	-0.80016	0.65663	0.2411	0.7907	0.22749	0.85536	-0.54862
ANKRD24	0.0093981	18234	0.66369	0.64389	0.32916	0.94502	0.15434	11257	0.31082	11824	0.0059653	20373	0.073849	23549	0.99381	-0.6927	0.98547	-17003	0.18295	32255	0.47468	-0.61118	0.22168	22762	0.32073	0.78983	0.51985	-1123	0.12885	21907	0.12293	2523
ANKRD26	0.66979	-0.042887	0.064229	0.61441			0.168	0.98232	0.5533	0.75149	0.7631	-0.37803	0.89866	0.28381	0.022876	17931	0.37259	-0.030658	0.896	-19057	0.91023	-10511	0.080453	38223	0.47574	-0.207	0.053429	0.86074	0.53928	0.59267	0.51507	0.16641
ANKRD27	0.15535	16114	0.34705	0.70157	0.68162	0.8614	0.17079	0.93774	0.91233	-0.31801	0.8607	0.19773	0.0039007	22691	0.29915	0.82027	0.62175	-0.16877	0.8522	-14198	0.30083	0.8107	0.043289	44304	0.3311	0.85414	0.28373	-0.41411	0.11692	21713	0.46048	0.2273
ANKRD28	0.68109	-0.25927	0.70973	0.635	0.66817	0.23696	0.85223	-0.5751	0.55323	0.15261	0.83805	-0.6651	0.5846	0.71658	0.90688	0.21447	0.83821	-0.76458			0.46465	0.3497	0.33434	17058	0.45319	0.26757	0.54806	-0.40737	0.68478	-0.56636	0.39744	-0.54898
ANKRD29	0.20446	1568	0.22009	0.56522	0.36716	0.1625	0.34848	0.034408	0.76832	0.14336	0.22251	14709	0.53078	-0.030877	0.20721	0.7433	0.116	10146	0.34945	21706	0.7399	-1483	0.73306	-0.30804	0.75237	0.20605	0.63963	0.20423	0.11047	17127	0.51877	-0.18919
ANKRD30A	0.0043282	3591	0.3426	0.88733	0.0064221	27317	0.25883	11303			0.10719	20356	0.11337	18904	0.15298	0.89827	0.69633	-1294			0.11655	0.26935			0.31673	0.16242	0.6501	-0.97335			0.26871	13733
ANKRD30B	0.78815	0.20936	0.29925	0.80587	0.16465	14701	0.29556	0.15641	0.93571	0.041103	0.52948	0.37767	0.57912	0.19878	0.098442	1739	0.31294	-0.27654	0.0061759	55502	0.35916	-0.084277	0.024553	1162	0.88381	-10405	0.21539	10621	0.5202	-0.77826	0.79177	-0.65107
ANKRD31	0.78249	-0.15877	0.88802	-0.34318	0.83875	-0.23757	0.58465	-0.64629	0.43085	-0.1137	0.043765	17184	0.19753	1296	0.52906	0.75904	0.97561	-13806	0.55861	0.73855	0.54581	-0.36549	0.72681	-11381	0.25356	0.7276	0.97604	-0.56581			0.55954	-0.14798
ANKRD32	0.69861	0.36601	0.32351	0.72804			0.062044	13413	0.40098	0.67156	0.40644	0.76302	0.34142	0.80038	0.49544	0.20663	0.37733	-0.38273	0.039413	33665	0.67162	-0.37635			0.78273	-0.47628	0.40792	0.443	0.2112	0.70352	0.18667	17797
ANKRD33	0.32848	0.91801	0.71246	-0.22589	0.12365	13295	0.80526	-0.27168	0.15416	0.51439	0.62281	0.27455	0.069507	22027	0.058684	0.45026	0.50233	-0.087324			0.25569	11698			0.7877	-0.62901	0.61564	0.27657	0.2069	-0.28447	0.42546	0.55265
ANKRD33B	0.3137	10386	0.50208	0.26786	0.46971	-0.43581	0.92544	0.05171			0.83153	-0.64691	0.63716	0.0609	0.39603	0.61503	0.75901	-13642			0.5702	-10285	0.19547	25241	0.0048516	27971	0.95921	-18694	0.22267	15299	0.43798	0.51777
ANKRD34A	0.81326	0.64067	0.5454	0.64944	0.12726	18083	0.77123	-0.46839	0.41964	0.15936	0.75682	0.67862	0.02015	22609	0.019259	0.63939	0.154	13897	0.49746	12199	0.79455	-16271			0.87935	-11256	0.83905	-10064	0.086325	25345	0.60078	-0.81351
ANKRD34B	0.59752	0.54197	0.98106	-12011	0.22751	0.091247	0.1652	0.15536	0.7592	0.41972	0.6414	0.36602	0.34437	0.32215	0.76313	0.54892	0.74708	-0.45128	0.99184	-36883	0.77631	-21381	0.5805	-0.23456	0.27287	10639	0.40099	0.44954	0.48027	0.58021	0.56782	-0.042711
ANKRD34C	0.87563	-0.39759	0.63916	0.32493	0.94917	-0.53873	0.7712	0.41695	0.35019	0.041758	0.94373	-0.71396	0.67953	-0.021875	0.17643	11177	0.55512	-0.20299			0.59194	-0.43637			0.28484	0.29756	0.46958	0.15026	0.63495	-0.74995	0.71828	-10723
ANKRD35	0.08921	21757	0.28164	0.88671	0.9322	-0.38046	0.54906	0.39097	0.034767	0.79706	0.00428	31168	0.31945	0.68836	0.25783	11237	0.23803	11115			0.85626	-0.11448			0.0024561	38284	0.7859	-0.36121	0.42988	-0.48138	0.34595	12455
ANKRD36	0.37289	0.95637	0.99386	-12703	0.49213	-0.45632	0.10838	10156			0.90935	-10095	0.46961	0.8971	0.9022	-0.59042	0.28881	-0.87637	0.9762	-31272	0.59399	-24114	0.27725	1863	0.6882	-10997	0.68678	0.16532	0.88441	-11874	0.5585	-0.35332
ANKRD36B			0.17787	0.028726	0.48115	0.80047	0.67191	-0.56665	0.3163	0.75426	0.88548	-0.082235	0.16053	18193	0.86562	-0.36798	0.85791	-0.39369			0.59384	-0.57374			0.79215	-16917	0.78965	-0.4941	0.61447	-0.16888	0.17452	21576
ANKRD37	0.11119	1949	0.8889	-0.30821	0.87119	-0.60189	0.8485	-0.45971	0.20523	13864	0.63295	-0.27066	0.81209	-0.32452	0.71225	-0.31018	0.91278	-0.43742	0.33134	21254					0.37475	0.76062	0.78211	-24596	0.20885	14518
ANKRD39	0.71682	-0.2595	0.90584	-0.7944	0.012435	34087	0.64264	-0.10276	0.93786	-0.44907	0.77218	0.052455	0.3783	0.79831	0.29954	0.97764	0.13596	-0.89562			0.83693	-0.36099	0.046238	4413	0.39993	0.70186	0.80987	-10661	0.0080628	29147	0.13715	23098
ANKRD40	0.42155	0.34581	0.13982	13275	0.1014	-0.42727	0.48137	-0.22126			0.64831	0.3428	0.6497	-0.014299	0.63186	-0.12081	0.15899	0.91066	0.75927	-0.12876	0.38273	0.66918			0.49041	0.21735	0.91434	-0.39286	0.30917	0.74947	0.34155	0.964
ANKRD42	0.023854	27099	0.9422	-0.57364	0.38019	0.95263	0.26476	0.72181	0.65923	0.57864	0.45751	0.014271	0.20783	12211	0.44548	0.22641	0.85559	-17097			0.058706	21092			0.8314	-10318	0.9713	-14743	0.35952	0.72204
ANKRD44	0.6169	0.23316	0.69489	-0.5752	0.098346	14082	0.61074	0.51569	0.18435	15979	0.098236	14441	0.25507	14346	0.69216	0.48353	0.027565	16556			0.14623	1004	0.7191	-12692	0.4368	-1611	0.2725	1086	0.31967	0.97742
ANKRD45	0.23799	13002	0.11248	14934	0.057277	25816	0.7726	-0.14606	0.97474	-0.67021	0.92693	-0.12537	0.8088	0.11617	0.80895	-0.024935	0.66703	-0.17315	0.87858	-17135	0.090503	20262	0.65426	-0.64338	0.30765	10452	0.58424	0.093655	0.22582	16837	0.58007	0.20622
ANKRD46	0.41968	0.17427	0.49058	0.54205	0.98987	-11501	0.8196	0.19972	0.56636	0.41423	0.7166	0.12296	0.052372	12726	0.33449	0.46662	0.54086	0.037496	0.58573	0.68425	0.89356	-10834	0.20178	25585	0.16611	0.87134	0.73298	-0.34316	0.56468	-0.41454
ANKRD49	0.47998	0.39338	0.68849	0.73243	0.53948	0.62632	0.83796	-10892	0.83186	-0.1233	0.80094	-0.39798	0.76077	0.22627	0.35516	0.69498	0.75787	-14026			0.96994	-15913			0.65583	0.15391	0.047161	21065	0.56029	0.41764	0.14985	18572
ANKRD5	0.71144	-0.5959	0.68115	0.2782	0.51245	0.69883	0.81077	-0.78445	0.29911	0.21456	0.20598	0.55736	0.95778	-0.5538	0.98274	-14573	0.27042	0.90188	0.45607	18742	0.54349	0.15609	0.5212	0.83811	0.34242	0.53871	0.9174	-0.37639	0.31629	-0.95719	0.78713	-14964
ANKRD50	0.16335	10888	0.96988	-15248	0.12916	15865	0.6799	0.3431	0.14154	18589	0.28419	0.8451	0.44756	0.21393	0.08445	15071	0.05177	11914	0.56434	0.77746	0.36138	-0.89626	0.94415	-15533	0.16473	-11818	0.75607	-0.6249	0.4274	0.33095	0.5883	-0.55377
ANKRD52	0.94349	-0.93155	0.98013	-16673	0.060874	21261	0.59345	-0.1302	0.18832	17351	0.95287	-13218			0.1267	10753					0.4423	0.35945					0.059593	25536	0.98524	-35162	0.74545	-12191
ANKRD53	0.31983	0.39992	0.78974	-0.21331	0.47067	0.47584	0.050788	0.94901	0.70144	0.66284	0.70937	-0.029002	0.67111	0.16684	0.67299	0.28623	0.29396	0.063763			0.4044	0.78234	0.049882	43461	0.58159	-0.84971	0.81237	-10188	0.41663	0.86677	0.60315	-0.41664
ANKRD54	0.61991	-0.0016423	0.81407	0.087039	0.15775	0.81615	0.032355	12848	0.66554	0.66111	0.18548	14888	0.34623	0.72342	0.86648	-0.68921	0.67314	-0.90074			0.4408	0.53588	0.1369	28881	0.085082	11846	0.58084	-0.39492	0.35416	-0.032216
ANKRD55	0.67117	-0.058773	0.82011	0.13349	0.44803	0.16766	0.38928	0.29459	0.76787	-0.51186	0.37596	0.95073	0.40797	11265	0.76961	-0.070298	0.92906	-0.95808	0.17196	27186	0.11457	0.30887	0.54938	0.99113	0.18697	15627	0.18875	13212	0.88878	-0.078652	0.030845	36164
ANKRD6	0.77598	0.12292	0.74879	-0.74786	0.90184	-0.9839	0.12357	0.99206	0.21574	-0.26406	0.35143	0.7923	0.84629	0.19776	0.35397	0.82696	0.46111	-16347	0.20082	23572	0.11937	-0.99733			0.46698	0.067	0.37145	-0.32036	0.58992	-24429	0.4318	0.63509
ANKRD61	0.22725	13676	0.84272	-0.19599	0.55838	0.56006	0.31231	0.72855	0.12535	21105	0.78447	-0.48149	0.25376	15157	0.33776	0.88558	0.62475	0.33167	0.73607	-0.31582	0.25408	-0.31053			0.85121	-14467	0.82712	-0.47927	0.78838	-12354	0.93828	-12113
ANKRD62	0.8973	-0.22263	0.15838	0.40869			0.6726	0.10251	0.1073	16613	0.76394	0.68587	0.096325	1862	0.88645	0.30233	0.35307	-11367			0.7837	0.29696	0.63861	-0.57235	0.93072	-17135	0.22272	0.73726	0.6407	-0.51922	0.31102	0.62451
ANKRD63	0.1217	15987	0.6833	-0.07416	0.053729	14884	0.92582	-0.10669	0.57995	0.54491					0.71616	0.038885	0.011932	2342	0.70375	0.49018	0.77217	-18812			0.65284	0.14229	0.68765	-1252	0.88161	-11126
ANKRD65	0.7969	-0.21435	0.44901	-0.088145	0.50791	0.68913	0.63677	0.061266	0.90355	-10412	0.83021	-0.49691	0.0077931	23817	0.84998	0.29944	0.64792	-0.4037	0.32749	22289	0.96133	-17621	0.80773	-17062	0.93429	-1783	0.49578	-11355	0.68762	-10496	0.47621	0.29893
ANKRD7	0.81582	0.082539	0.68666	0.063107	0.66507	0.39874	0.76064	0.52851	0.4854	11344	0.64951	0.78697	0.90542	-0.72791	0.53563	-0.14745	0.10447	-0.43432	0.91494	-21377	0.68715	0.17223	0.7164	0.046223	0.38237	-0.71711	0.37813	0.028537	0.0061384	25198	0.084745	19568
ANKRD9	0.63125	-0.33142	0.94459	-0.72051	0.341	0.94878	0.53493	0.64075	0.18144	13001	0.4675	0.65094	0.8662	-0.67545	0.11556	10202	0.85331	-0.51018			0.051654	0.88695	0.86614	-21695	0.33837	0.82148	0.82801	0.13288	0.66573	-0.92572
ANKS1A	0.55696	0.15276	0.17081	10745	0.37575	0.74177	0.13334	0.84181	0.21979	15743	0.85029	-0.73444	0.50279	0.46107	0.43678	0.2789	0.36086	0.69752	0.89117	-0.99219	0.014276	26367	0.082505	39138	0.15813	17296	0.59107	-0.41071	0.76729	0.47896	0.22476	-0.86019
ANKS1B	0.12466	17148	0.080389	0.9363	0.60523	-0.12147	0.48544	0.66807	0.072666	21058	0.86881	-0.4732	0.39717	12574	0.30743	0.53684	0.2721	0.86718	0.064344	32365	0.17133	-0.40797	0.70503	0.11885	0.9219	-15203	0.072005	15422	0.49574	-15008	0.39681	10484
ANKS3	0.66551	-0.52966	0.92641	-0.43867	0.17729	12816	0.25928	0.71932	0.36141	0.93052	0.6258	0.32885	0.8513	-0.66833	0.79189	-0.38125	0.5972	-0.18072	0.054397	42669	0.0062735	28586	0.48247	0.39448	0.64065	-0.38638	0.75403	-0.31649	0.32334	10217	0.25684	15872
ANKS4B	0.25648	0.54689	0.96412	-0.68971	0.66813	0.28768	0.14531	0.90956	0.94654	-1354	0.73888	0.017962	0.97148	-0.094114	0.48381	0.20251	0.45437	-0.14391			0.72349	-0.53646	0.16936	27838	0.23529	11332	0.89905	-0.51047	0.8433	-11094	0.82583	0.35562
ANKS6	0.63736	-0.21762	0.391	0.30685	0.59689	0.72631	0.94897	-0.60227	0.049356	19892	0.16933	0.93253	0.24336	0.53138	0.39757	0.33211	0.8299	-11477	0.74539	-0.4483	0.3978	0.61076	0.87563	-22586	0.28045	12277	0.46998	0.34186	0.57248	-0.40298	0.56098	0.058585
ANKUB1	0.93476	-0.12605	0.23406	0.85106	0.42999	0.94028	0.18231	10725	0.080435	16815	0.2748	1107	0.088863	1744	0.67719	0.15465	0.41041	-0.21749	0.21472	29021	0.87914	-17086	0.0215	49454	0.77009	-0.52324	0.81674	-1307	0.31895	10611	0.34078	-0.27365
ANKZF1	0.70296	0.44508	0.48	0.46791	0.51493	0.28592	0.22593	0.80714	0.032438	0.89769	0.38042	0.86774	0.1227	17256	0.53547	0.52816	0.39002	0.75307	0.81601	-0.55841	0.53057	-0.64766	0.2978	1971	0.66979	-0.63179	0.45713	-0.79963	0.95742	-28112	0.6293	0.5009
ANLN	0.26026	0.16684	0.53598	0.4841	0.12824	15146			0.055461	23975	0.25338	12723	0.29985	0.52624	0.57842	-0.28612	0.54148	-14814			0.041498	-20053			0.33973	0.90873	0.24541	11246	0.77212	-15444
ANO1	0.39335	-0.27813	0.32423	0.039204	0.54822	0.16148	0.32784	0.95198	0.63601	0.34016	0.46129	0.31212	0.13092	13149	0.97463	-1058	0.34827	0.59825			0.37214	0.47959	0.89766	-1019	0.17194	13888	0.84747	-0.37907	0.069517	21237	0.57635	-0.23768
ANO10	0.57444	0.34421	0.47402	0.17391	0.51004	0.56098	0.75791	-0.14061	0.46581	10008	0.20298	12373	0.58386	0.69199	0.79638	0.44857	0.78485	-0.55557	0.5981	0.56177	0.71173	-16131	0.94718	-21075	0.86507	-20804	0.51436	-22424	0.89831	-10572	0.97382	-12081
ANO2	0.2556	13868	0.121	12272	0.47986	0.79052	0.15727	0.91699	0.44859	-0.2576	0.054107	15426	0.54417	0.23645	0.31119	11018	0.037511	-0.018876			0.018095	13094	0.55466	-0.056723	0.82223	-0.31005	0.83825	-17771	0.64389	-0.41365	0.036161	13152
ANO3	0.19895	15387	0.28427	0.82983	0.75353	-0.43285	0.49192	0.59611	0.7934	-0.36248	0.12214	13336	0.8888	-0.049192	0.23202	10746	0.59559	0.43471	0.70262	-0.15362	0.73754	-1583			0.49205	-0.066993	0.1356	16685	0.11507	14558	0.31789	0.59205
ANO4	0.73421	-11249	0.037478	1269	0.96009	-0.55869	0.51634	0.41421	0.87416	-0.48295	0.53878	-0.2743	0.68509	0.34425	0.095757	12221	0.011948	19847			0.78782	-0.62145	0.72455	-1129	0.53519	0.088275	0.9292	-13657	0.39604	0.633	0.53857	-0.22424
ANO5	0.46219	0.94122	0.06724	13507			0.63784	-0.73079	0.13678	18593	0.60322	0.16409	0.071293	13029	0.90051	0.45084	0.67854	0.41442			0.69123	-0.62192	0.36669	15487	0.76116	-10477	0.28792	0.95423	0.46	-0.24552	0.27042	14573
ANO6			0.89662	0.10039	0.58641	0.88845	0.22662	-0.13962	0.19566	14688	0.23279	11531	0.029891	23585	0.3343	-0.65065	0.85915	-0.5179	0.11941	16704	0.78343	0.1661	0.53872	0.041096	0.75783	-0.26884	0.16246	0.99924	0.581	-0.31208	0.21371	-0.25328
ANO7	0.35628	-0.27835	0.4928	0.73932	0.49346	0.45487	0.1248	11385	0.56133	0.34347	0.62682	0.010138	0.66403	0.79676	0.61793	0.53761	0.62815	-0.70613			0.11291	15531			0.61648	-0.97511	0.26958	0.23214	0.29926	-0.37119	0.73134	-0.88378
ANO8	0.52653	0.68225	0.62743	-0.18968	0.64322	0.75434	0.56899	-0.14059	0.02071	20829	0.24263	0.81446	0.17074	11344	0.54481	-0.021682	0.93052	-26454	0.68023	-0.55854	0.045616	-0.85681	0.25111	1408	0.44991	-0.12988	0.75442	-0.21769	0.94516	-1715	0.016647	38923
ANO9	0.71501	0.66532	0.86396	-0.43991	0.97416	-0.85038	0.14507	0.58539	0.55371	0.279	0.92881	-0.57213	0.69477	-0.37569	0.2455	0.97243	0.14431	-17291	0.4197	13544	0.72556	-0.11198			0.043511	15906	0.78676	-12183	0.18012	10499	0.70818	-10074
ANP32A	0.78011	-0.56535	0.39416	0.87448	0.21026	1592	0.45412	0.67534	0.54653	0.18953	0.069023	0.77367	0.91632	-1028			0.15999	0.98083	0.024539	21596	0.0022479	-0.59996	0.87235	-22325	0.29132	12606	0.14818	0.19075	0.63059	-11845	0.35744	1075
ANP32B			0.54279	0.5304	0.75446	0.27294	0.78335	-0.64788	0.2832	0.24997	0.22405	0.39082	0.40857	0.21615	0.53483	0.94481	0.93331	-12959	0.47887	13574	0.39348	-0.45391			0.94196	-16118	0.41577	0.6825	0.35012	0.78558	0.0354	25174
ANP32D	0.53412	0.26356	0.18063	11278	0.86336	-0.051762	0.10929	1354	0.41572	12062	0.60655	0.084907	0.93175	-0.30689	0.5722	0.29417	0.48805	0.22098			0.1313	11194	0.69685	-10246	0.38061	0.9585	0.74076	0.1598	0.63025	-0.72612	0.19969	0.51899
ANP32E	0.76088	-0.006849	0.12729	0.67984	0.85281	-0.29909	0.51148	0.48496	0.88155	-0.61865	0.0035896	20634	0.33943	11587	0.42095	10151	0.9716	-12073			0.042211	20297	0.72659	-11348	0.097333	20679	0.96994	-18226	0.58359	-0.10951	0.5874	0.11288
ANPEP	0.76577	0.34208	0.52134	0.61913	0.17282	10623	0.41663	0.65102	0.33036	0.90251	0.95561	-0.26725	0.9699	-15349	0.93448	-0.55389	0.60412	-0.51669	0.43975	14302	0.13833	0.062175	0.74707	-12922	0.28385	-0.50515	0.77409	-0.56655	0.31964	11846	0.70416	-0.24284
ANTXR1	0.97289	-1748	0.90707	-0.13496	0.93532	-11605	0.69199	-0.44437	0.53997	0.31602	0.26472	0.8356	0.62295	-0.54664	0.82832	0.2212	0.30488	0.47045			0.869	-12298	0.24685	1875	0.79958	-0.88051	0.89626	-0.83028	0.56296	0.29118	0.32593	10911
ANTXR2	0.6219	0.65146	0.81476	-0.91183	0.75792	-0.28946	0.62906	-0.39234	0.90136	0.27931	0.25638	0.99703	0.044724	15076	0.43003	0.18835	0.70944	-0.5553	0.84202	0.30145	0.75166	-0.12122	0.070161	25184	0.37648	0.63717	0.12601	12168	0.81361	-10249	0.050549	27877
ANTXRL	0.94302	-0.17733	0.7717	0.062012	0.70549	-0.29435	0.71568	-0.19205			0.84424	-0.18008	0.17656	13503	0.48278	0.79283	0.55695	-0.22668	0.14987	34355	0.085124	0.76247			0.52882	-0.073628	0.41791	0.033668	0.018656	0.55285	0.97798	-23444
ANXA1	0.79261	0.21067	0.36263	-0.0054037	0.94082	-0.33504	0.54507	0.27999	0.83545	0.28463	0.79697	-0.040055	0.92383	-0.19161	0.018249	12208	0.46501	0.098662	0.70519	0.87948	0.15086	-0.68149	0.98226	-2668	0.45983	0.48864	0.69551	-0.024782	0.87224	-13536	0.69644	-11387
ANXA10	0.37618	0.29468	0.52344	0.48409	0.39765	0.1598	0.38715	0.49282	0.73754	0.46567	0.50756	0.19717	0.88149	-0.90091	0.07388	0.90137	0.75303	-11133	0.089595	24397	0.51218	0.6143	0.17202	0.50481	0.19393	0.69648	0.90728	-2387	0.54145	-14155	0.010173	33771
ANXA11	0.89031	-0.42016	0.57408	-0.60431	0.78319	0.00019687	0.2508	0.54052	0.20146	12166	0.75327	0.082895	0.62872	0.02387	0.053434	15133	0.92487	-15009	0.58525	13809	0.73446	0.05992	0.15042	11047	0.21973	0.73356	0.11629	-0.35212	0.96549	-16454	0.27449	14562
ANXA13	0.80289	-0.71768	0.24888	0.88144	0.92116	-0.22536	0.97471	-0.71335	0.97052	-0.80908	0.72139	-0.13206	0.8488	0.023936	0.26804	0.41294	0.20451	0.82605	0.39571	17955	0.31656	-0.64791			0.41615	0.31421	0.22996	11875	0.88576	-0.4642	0.7356	-0.1871
ANXA2	0.60938	-0.082035	0.46563	-0.088882	0.01891	1705	0.77507	0.31397	0.70505	-0.01428	0.054581	0.90817	0.26829	12413	0.59231	-0.23728	0.93658	-15564	0.15584	33779	0.77508	-0.93722	0.12935	3166	0.92319	-0.60094	0.58672	0.4737	0.53287	-11012	0.35434	10027
ANXA2R	0.61956	0.35099	0.89907	-0.15472	0.47586	0.43977	0.35198	0.11264	0.44181	0.33515	0.43023	0.53493	0.75398	0.24893	0.5951	0.41569	0.61345	-0.9867	0.10855	37824			0.13683	19476	0.50858	0.60411	0.3104	-18221	0.68213	-0.36858	0.20026	0.38741
ANXA3	0.43849	-0.059936	0.78991	-0.031847	0.54784	0.17344	0.5985	-0.077696	0.93017	-0.46126	0.41871	0.68137	0.88128	-0.043548	0.044849	10641	0.80962	-0.11192	0.21642	23175	0.65284	0.1368	0.05004	42481	0.063659	14352	0.53795	0.18201	0.46483	0.31096	0.52519	0.096633
ANXA4	0.90644	-0.8237	0.014068	0.87319	0.15406	13492	0.61006	-0.63967	0.68242	0.2876	0.11395	0.77031	0.64625	-0.30386	0.95401	-0.84525	0.56886	0.1756			0.2523	1057			0.37167	0.87252	0.24466	0.97184	0.026237	0.26943	0.19327	15818
ANXA5	0.72325	0.52528	0.55622	-0.10157	0.55359	-0.49656	0.47453	0.0075542			0.18674	-0.52216	0.067589	18183	0.14498	0.312	0.72422	0.0012793			0.30605	0.8702	0.97728	-34078	0.062748	19489	0.20392	10028	0.087196	2645	0.33023	0.63304
ANXA6	0.56209	-0.83829	0.1906	0.85295	0.58808	0.64214	0.97962	-0.31067	0.79889	-0.096208	0.74838	-0.40953	0.16328	12474	0.471	0.25831	0.052981	0.79676	0.030192	47136	0.29777	0.56154	0.26074	19138	0.049745	17659	0.5858	-0.59208	0.55034	-0.42152	0.84114	-1884
ANXA7	0.031737	12867	0.91323	-0.35034	0.27924	0.90161	0.34706	0.32848	0.89632	-1011	0.41255	0.92979	0.086764	1659	0.71265	-0.02229	0.72369	-0.5529			0.85393	-0.24215	0.65355	-0.65335	0.21876	13488	0.4383	0.6733	0.42304	0.29763	0.31668	11881
ANXA9	0.66738	0.13018	0.12021	15069	0.90638	-0.20341	0.3531	0.46524	0.15896	12271	0.55645	0.5349	0.08105	2281	0.24726	10258	0.67792	0.2039	0.2044	20328	0.14422	0.69654	0.72216	0.34897	0.66765	-0.10036	0.48387	-26471	0.028613	16576	0.8659	-25216
AOAH			0.9652	-0.4549	0.80641	-0.55317	0.30972	-0.17389	0.82266	-0.74908	0.57208	-0.12772	0.80944	-0.37883	0.37211	-0.47146	0.95048	-16983			0.50847	-0.19363			0.46347	-0.077981	0.36963	0.1844	0.23937	0.99126	0.97474	-21911
AOC1	0.85706	-0.053925	0.40002	-0.034918	0.96588	-0.69765	0.37113	0.38409	0.93798	-0.8102			0.38504	0.83455	0.94712	-0.69054	0.91801	-0.38601	0.68004	0.0080574	0.65413	-0.55151			0.31574	-0.26522	0.59028	-0.40673	0.84004	-19801
AOC2	0.62538	0.031035	0.48823	0.67761	0.60639	0.38524	0.56021	-0.46885	0.31573	13502	0.58228	0.72399	0.36669	12645	0.7647	0.094123	0.40151	-15096	0.33107	22605	0.087614	21243	0.50152	0.73312	0.88381	-0.66023	0.98372	-18888	0.89101	-23458	0.22299	17625
AOC3	0.54795	0.25142	0.30486	0.72776	0.61612	-0.00034356	0.62583	0.17901	0.56211	11128	0.93508	-0.1057	0.14909	16357	0.94375	-0.24902	0.83505	-17333	0.36194	26032	0.97333	-16276	0.19345	24915	0.11798	10217	0.20716	0.94675	0.89645	-14697	0.55975	-12551
AOX1	0.46818	0.77291	0.11134	0.92403	0.32364	-0.52278	0.16075	0.91158	0.94742	-0.93936	0.69746	-0.2133	0.75798	0.15766	0.038484	16626	0.16871	0.71541	0.4968	11819	0.21679	0.71198	0.89745	-24383	0.8418	-19738	0.21529	0.90429	0.64716	-10282	0.88581	-0.0118
AP1AR	0.43376	0.7152	0.51893	0.12028	0.060079	0.99816	0.50223	0.17817	0.30921	11384	0.65476	0.32052	0.045065	23223	0.25497	12294	0.43705	0.29828	0.029284	42336	0.20471	-0.11938	0.86461	-12485	0.26882	0.039878	0.35896	0.19498	0.9244	-16546	0.25976	15441
AP1B1	0.3297	0.35232	0.87208	-0.13301	0.53726	-0.019671	0.00023238	21357	0.27453	0.73589	0.72895	-0.30347	0.67273	-0.13854	0.0082574	15087	0.40348	-0.034042	0.67888	0.014828	0.69019	0.18553	0.94197	-0.48223	0.30082	0.94158	0.52881	-0.974	0.16555	-14466	0.24275	0.04119
AP1G1	0.25354	-0.75962	0.60036	0.36495	0.31625	0.96919	0.33781	0.53826	0.40233	0.59695	0.44721	0.41755	0.0045719	3623	0.52842	-0.16222	0.59044	-0.50027	0.44813	15737	0.044918	13738	0.27548	10645	0.24916	0.88765	0.12911	11632	0.0056203	3726	0.31322	0.35116
AP1G2			0.92825	0.16874			0.014467	19048	0.71743	0.32044			0.63358	0.85289	0.19374	11887	0.26592	0.91524			0.81152	0.15041	0.73633	0.039628	0.54851	-10832	0.36156	0.78687	0.22726	14575	0.43186	0.53312
AP1M1	0.37421	0.51845	0.4132	0.30471	0.58304	0.45777	0.93015	-0.28902	0.51103	0.29909	0.29211	0.90359	0.58178	0.8003	0.9668	-0.33547	0.96794	-11568	0.021846	49444	0.11353	13181			0.3375	0.92408	0.78983	0.049626	0.89782	-23822	0.38538	0.62707
AP1M2	0.89658	-0.34833	0.16844	0.72365	0.2841	11399	0.8659	-0.70907	0.40706	0.66683	0.12944	14577	0.18182	13013	0.1103	11081	0.80255	0.17059	0.26615	21212	0.21763	0.73136			0.013037	-0.7922	0.47115	-0.43866	0.34169	0.85217	0.61177	-0.55537
AP1S1	0.42335	0.43362	0.21252	0.76452	0.91258	-0.66013	0.96787	-0.92939	0.23603	13797	0.86599	0.5908	0.67631	-0.069106	0.82423	-0.041772	0.46132	0.55547	0.3078	23423	0.02625	18697	0.47721	10447	0.099136	1961-01-01	0.13094	-1086	0.26107	12663	0.16326	14288
AP1S2	0.61597	-0.38501	0.18049	0.89313	0.71014	0.23102	0.51861	-12997	0.88528	0.082914	0.56067	0.76931	0.85278	-0.35358	0.27694	0.53864	0.72792	0.41964	0.81291	-10274	0.36421	0.40654	0.028603	2393	0.68965	-0.52291	0.42695	-0.24683	0.50433	-10548	0.2893	-0.8393
AP1S3	0.14067	0.62933	0.85653	-0.19157	0.30771	-0.040876	0.43154	-0.66902	0.10835	11992	0.27135	11276	0.86559	-0.18658	0.44562	0.72908	0.47222	0.24513	0.22361	29964	0.31049	0.82254	0.99129	-27356	0.075812	17512	0.21484	0.49823	0.11364	11997	0.97428	-23038
AP2A1	0.35806	0.31684	0.88457	-0.51412	0.5779	0.20086	0.49259	0.25574	0.97584	-0.83255	0.63015	0.5435	0.19076	12151	0.020818	0.5878	0.83319	-0.87122	0.82015	0.48624	0.90693	-13076	0.099883	23222	0.88996	-0.67847	0.76256	-0.64352	0.22235	0.86439	0.89682	-14968
AP2A2	0.97492	-14974	0.55285	-0.54023	0.94582	-0.55187	0.49364	-0.23315	0.44782	0.4976	0.89689	0.077572	0.78456	0.24542	0.83552	-0.025817	0.044584	16265	0.80162	0.51798	0.57991	0.35227	0.77282	-14667	0.14989	16686	0.41103	-0.3963	0.95572	-26178	0.41319	0.49992
AP2B1	0.29332	0.36249	0.42148	-0.76364	0.64354	0.087379	0.21414	0.62476	0.55561	0.27519	0.26476	-0.3643	0.11213	1481	0.08069	16406	0.32289	0.41231			0.95486	-0.98328	0.00028101	56589	0.53159	-0.30941	0.69757	-1006	0.55681	0.18896	0.38296	-14673
AP2M1	0.054886	1267	0.276	20538	0.10523	16326	0.13365	0.83728	0.65767	0.923	0.042293	12491	0.87277	-0.35286	0.09482	1132	0.29849	-0.73515	0.024981	0.99438	0.898	-20047	0.67438	0.85075	0.70307	-19623	0.0042791	17355	0.22321	0.37374	0.42565	0.83531
AP2S1	0.78679	-0.29664	0.10566	1062	0.052956	21571	0.001899	19813	0.84112	-0.34521	0.06548	10102	0.053433	22877	0.6213	0.093021	0.38508	0.56944	0.21388	29757	0.89366	-0.30114	0.17628	26782	0.61602	-0.98069	0.0026215	26883	0.17029	1101	0.87952	-12519
AP3B1	0.34584	10742	0.8362	-0.1745	0.84873	0.33423	0.1844	0.7802	0.82908	-0.50711	0.37586	0.51347	0.71608	-0.59932	0.31558	0.86576	0.24815	-15566	0.76115	-0.57766	0.70794	-0.64076	0.96277	-31349	0.95119	-24905	0.50025	-0.13802	0.90737	-0.54073	0.18341	15908
AP3B2	0.52314	0.71104	0.21526	1132	0.54112	-0.047261	0.59507	0.69531			0.71263	0.1123			0.40762	0.70475	0.91913	-13815			0.78698	-17105			0.50653	-0.47494	0.040743	23086	0.17977	13977	0.0039042	-1031
AP3D1	0.71327	0.0039804	0.20078	-0.99633	0.41119	-0.18782	0.51637	-0.091515	0.35012	0.021418	0.17343	0.30606	0.96751	-14925	0.63812	-10327	0.24484	0.0023182	0.5197	10231	0.16418	12507	0.88532	-0.73152	0.87148	-0.75548	0.29763	-0.397	0.082037	21013	0.21595	17783
AP3M1	0.55033	-0.091334	0.58767	-0.031629	0.13449	13414	0.87221	-0.37122	0.5217	0.31781	0.98456	-0.36878	0.26657	11399	0.53014	-0.54591	0.065079	11238			0.6148	-11607	0.46034	0.55345	0.77672	-0.85607	0.5332	0.059075	0.67497	-0.43882	0.38159	11875
AP3M2	0.66502	0.64957	0.36524	0.031181	0.67447	0.1254	0.34873	0.016409	0.19331	14035	0.80543	0.66329	0.74331	0.40112	0.17321	0.9584	0.24031	0.7698	0.57629	0.7297	0.8765	-11413	0.56647	-0.12387			0.53011	0.15939	0.94288	-0.81257	0.34819	11845
AP3S1	0.89667	-0.51089	0.63566	-0.17463	0.29592	0.038441	0.45121	0.23273	0.67869	0.23711	0.51855	0.23707	0.3995	0.22268	0.74168	-0.46991	0.026758	17494	0.96447	-28694	0.30811	0.74999			0.17454	15624	0.57815	-0.50555	0.73556	-13152	0.23207	16449
AP3S2	0.65125	0.64552	0.23676	0.23183	0.70115	0.21672	0.69821	-0.66122	0.49986	0.0096091	0.076826	12593	0.065447	21739	0.16077	-0.12217	0.26247	0.94441			0.51262	-0.57855			0.31449	0.77904	0.72337	0.077168	0.5943	-0.52083
AP4B1	0.45505	0.024903	0.97643	-0.10972	0.30162	0.85022	0.63151	-0.32945	0.16678	-0.1417	0.094032	-0.28336	0.66817	-0.094046	0.77673	0.37473	0.77142	0.074417			0.73445	-11318	0.070253	4044	0.73124	-18251	0.2892	-0.4384	0.67336	-0.76157	0.22805	17838
AP4E1	0.80269	-0.47358	0.348	0.34783	0.015115	23052	0.22316	-12136	0.8404	-0.80365	0.30902	0.70489	0.3879	0.91134	0.82651	-0.69244	0.35902	-0.091232	0.43704	15579	0.18412	0.97943			0.88551	-0.35273	0.57358	0.13354	0.00557	31752	0.17121	0.40559
AP4M1	0.54736	0.06561	0.78078	-0.4524	0.27436	0.9133	0.23093	0.45103	0.65621	-0.39267	0.099532	14732	0.27492	12546	0.41354	0.70352	0.36374	0.29557	0.78054	-11073	0.60617	0.012723	0.41892	0.80671	0.92605	-0.60199	0.34647	0.85686	0.046757	0.88505	0.56061	-14509
AP4S1	0.66858	0.65479	0.58225	-0.15459	0.30148	0.41592	0.40367	0.45224	0.064227	19131	0.22588	0.9155			0.11294	18203	0.35798	-0.78083			0.50204	-0.17922	0.9937	-40517	0.00081409	28686	0.1451	-0.023428	0.18163	16589	0.599	0.54355
AP5B1	0.86205	-0.88158	0.16013	11982	0.89909	-0.094169	0.54845	-0.31553	0.20718	12705	0.77167	0.54666	0.25638	13255	0.32511	0.04225	0.15974	13708			0.098975	16527			0.23461	0.838	0.25046	0.79216	0.78876	-16496	0.23648	0.55968
AP5M1	0.085026	12271	0.21209	0.44845	0.13742	0.76942	0.64877	0.56425	0.068182	18456	0.5191	-0.13129	0.03162	1949-02-01	0.38601	0.56257	0.38465	-0.063939			0.51146	-20166			0.73929	0.13799	0.54224	-0.77562	0.16504	18814	0.43574	0.79933
AP5S1	0.45016	-0.7753	0.18604	10315	0.55688	-0.37828	0.8675	0.49636	0.56665	0.027699	0.40839	0.6366	0.22868	14653	0.7318	0.62488	0.28249	0.85761	0.56678	15026	0.34939	0.58823			0.29178	0.18884	0.10944	12356	0.24836	-0.13401	0.036719	16036
AP5Z1	0.49066	-0.67911	0.61055	0.40785	0.70404	-0.74619	0.29141	0.33112	0.13963	0.88097	0.97768	-0.96158	0.2119	14581	0.37127	0.1304	0.51381	0.30182			0.6047	-0.64773	0.12704	32072	0.78299	-12082	0.96375	-0.9619	0.32689	0.12351	0.99271	-20519
APAF1	0.96439	-0.29709	0.04904	13296	0.58843	0.37413	0.73098	0.57954	0.93053	-12531	0.82123	-0.17203	0.087793	19185	0.5214	0.80355	0.32582	0.52801			0.58822	-0.021892	0.89913	-24587	0.15171	15271	0.042333	0.94864	0.38004	0.85756	0.12968	0.32696
APBA1	0.98719	-0.55114	0.0020743	15827	0.47262	0.56148	0.24358	0.90527	0.96711	-0.41448	0.73472	0.82067	0.25111	1279	0.26557	0.81086	0.28848	0.82964			0.53432	0.46521	0.80113	-0.34204	0.21715	10304	0.86688	-11485	0.98952	-18229	0.69641	0.33716
APBA2	0.63311	0.3798	0.57177	-0.26024	0.36822	-0.0085353	0.40137	0.32115	0.70348	-0.16835	0.85646	-0.1422	0.93239	-0.0033654	0.91908	-0.12893	0.23166	0.73253	0.26913	26591	0.55503	-0.57976	0.68291	-0.82323	0.18657	0.57204	0.026029	0.064667	0.56671	-0.11964	0.16405	-18405
APBA3	0.68896	0.33783	0.050081	15292	0.9312	-11398	0.33783	0.6978	0.83637	-0.030865	0.67057	0.13896	0.54338	0.92051	0.79532	0.31847	0.40805	-0.043743			0.2037	-0.026008	0.12154	32719	0.11384	19654	0.50778	0.060598	0.89604	-0.4854	0.4852	0.78172
APBB1	0.67728	-0.21157	0.86977	0.40194	0.15056	0.64193	0.60375	-0.53413	0.83894	-0.49729	0.9984	-0.64549	0.96729	-0.94508	0.32593	-0.020026	0.7594	-10264	0.58538	-0.018968	0.67783	-0.15863	0.3358	0.69105	0.94916	-0.96164	0.64864	-0.52507	0.7434	-12769	0.81409	-31318
APBB1IP	0.17453	0.86123	0.2611	0.86239	0.92764	0.23871	0.43066	0.046429	0.66737	0.59622	0.43118	0.44231	0.4089	0.051355	0.93063	-0.87302	0.27608	0.81168	0.2083	29454	0.79416	-0.81641	0.3824	-0.51107	0.94621	-16569	0.60227	0.06697	0.97808	-15238	0.37118	0.84067
APBB2	0.61213	0.69895	0.41465	0.53527	0.77467	0.49115	0.52337	-0.013459	0.99584	-0.82623	0.41932	0.77164	0.38977	0.95012	0.77594	0.59882	0.13941	0.20147	0.023214	48519	0.63664	-0.35701			0.93075	-15017	0.086578	14281	0.8923	-19276	0.73678	-0.26116
APBB3	0.71499	0.51678	0.33068	0.65588	0.072587	13586	0.69606	-0.32817	0.75125	0.24351	0.22747	11259	0.74131	-0.22927	0.95065	-0.28577	0.98793	-10504			0.78503	-11961			0.25196	-0.0088325	0.2097	0.45721	0.96599	-31348
APC	0.6637	0.58477	0.66267	0.37764	0.8581	-0.41041	0.99603	-0.89799	0.96263	-11585	0.044029	1364	0.21834	1542	0.38977	0.3364	0.19187	-0.47497	0.27018	0.94203	0.54915	0.37023			0.42288	-11467	0.029193	19299	0.55398	-11192	0.15205	22671
APC2	0.16107	0.27999	0.29027	0.53293	0.54062	0.020941	0.2394	0.84136	0.25428	14726	0.030522	13103	0.2529	13224	0.93154	-0.5703	0.4209	-11234	0.46834	17815	0.46758	0.39808	0.83802	-19409	0.44442	0.16661	0.33395	0.24896	0.56175	0.36014	0.94231	-22176
APCDD1	0.19854	10959	0.95613	-0.15229	0.77624	-0.563	0.40956	0.45198	0.55273	-0.38965	0.36049	-0.12757	0.062876	16533	0.39932	0.56757	0.70622	-0.069676	0.67998	0.68466	0.43008	0.56058	0.92912	-27478	0.58384	-0.93885	0.61576	0.36394	0.42465	0.72843	0.49975	0.15894
APCDD1L	0.61402	-0.047256	0.016452	0.75902	0.086319	14006			0.50979	10383	0.41248	0.40482	0.56385	0.26315	0.80556	0.26277	0.68373	-11522			0.56488	-13302	0.80955	-0.71527	0.22298	-11594	0.14554	11522	0.27912	-23961	0.64737	0.48788
APCS	0.20123	16283	0.81381	-0.040822	0.38329	0.6484	0.39388	0.69476	0.00033454	53568	0.70226	0.55032	0.86233	-0.69859	0.92411	0.29755	0.47391	-0.75692	0.14107	35781	0.0004886	34901	0.67439	-0.77338	0.21078	15162	0.61657	0.10896			0.029891	1963-03-01
APEH	0.69472	-0.0088618	0.36265	0.47544	0.85564	0.26853	0.65697	0.1651	0.79646	0.16368	0.72814	0.1257	0.55383	0.37491	0.12685	13073	0.12556	13136			0.51505	0.081205			0.19761	0.098289	0.3873	0.1502	0.50479	0.34245	0.78084	-25007
APEX1	0.9392	-11033	0.78586	-0.6239	0.94338	-10377	0.1226	-0.70235	0.56843	0.093376	0.75474	0.047418	0.94686	-11782	0.68247	-0.12219	0.50857	0.20091	0.7141	0.7755	0.71501	-0.34219			0.58242	0.1316	0.35184	-0.095998	0.30907	10955	0.97877	-32302
APEX2	0.72439	0.87803	0.95483	-0.27006	0.86836	-0.45816	0.35147	-0.86323	0.26503	12495	0.31959	0.84344	0.26932	13825	0.60658	0.43497	0.48876	-0.59613	0.14012	35269	0.36678	0.71837	0.28059	13294	0.6173	0.50405	0.63062	-0.5846	0.31348	0.79278	0.99111	-18832
APH1A	0.91605	-0.73103	0.27129	0.53731	0.99109	-0.41442	0.41687	0.28099	0.46088	-0.8854	0.8832	-0.56623	0.40653	0.72591	0.67513	0.25087	0.6898	-0.76963	0.79658	0.72009	0.95663	-0.63427	0.69582	0.057305	0.61199	-0.37341	0.87454	-0.042639	0.46567	0.543	0.98979	-35552
APH1B	0.77961	0.19045	0.97791	-0.81308	0.24468	13325	0.86574	-0.94444	0.91301	-0.75172	0.37177	-0.087114	0.39647	1042	0.84899	-0.45467	0.47733	0.62955	0.11051	36448	0.7833	-0.15268	0.55632	-0.015699	0.67523	-13707	0.50012	-0.1751	0.26844	-10671	0.26267	0.85887
API5	0.84272	-0.023455	0.90133	-0.18802	0.92286	-0.7033	0.7033	0.54684	0.26742	12862					0.44146	0.72655	0.37545	0.51529			0.29057	-0.58491	0.54359	0.012605	0.084945	21199	0.85606	-11031	0.88167	-10672	0.95723	-20006
APIP	0.69066	-0.2445	0.79863	-0.29664	0.33123	-0.70262	0.69326	-0.37772	0.96988	-0.17104	0.31421	0.33193	0.71992	-0.050928	0.22034	0.62623	0.83509	-0.42652	0.20477	30656	0.43253	-14071			0.1568	14773	0.086675	10957	0.7499	-0.44085	0.77705	0.49639
APLF	0.95402	-0.91199	0.063184	0.74788	0.2951	0.43759	0.10178	0.79367	0.50435	0.91926	0.72464	0.2269	0.27	0.33557	0.27227	0.73523	0.98363	-10028			0.33518	-10768	0.96801	-32361	0.43619	-0.94563	0.74294	-0.5555	0.60103	-0.71552	0.81449	-13168
APLN	0.98194	-11681	0.81142	-0.18576	0.38699	0.40161	0.52039	0.20421	0.36226	0.38332	0.25389	0.59547	0.54192	0.71662	0.70542	0.01554	0.76285	-11039	0.42251	15853	0.37819	0.56809	0.93141	-27703	0.56982	-0.17287	0.12096	0.67989	0.073597	-13949	0.99109	-18002
APLNR	0.17206	11391	0.17613	-0.10957	0.19048	0.90451	0.98714	-0.40174	0.19404	13208	0.3933	0.41244	0.17724	0.86481	0.79894	0.10256	0.08643	12355	0.18993	31548	0.66269	-0.58402	0.3583	11999	0.18258	13752	0.49274	-0.75764	0.44071	0.63682	0.654	0.39205
APLP1	0.77724	0.13161	0.70365	0.45244	0.057215	12691	0.7548	-0.27021	0.34283	-0.50334	0.52259	0.56906	0.61399	0.45017	0.098056	0.94385	0.71002	-0.63091	0.1377	35155	0.093989	0.86778	0.17902	-0.78335	0.74486	-0.54735	0.39349	0.71502	0.23297	13288	0.23703	10965
APLP2	0.28506	0.56588	0.035759	0.12322	0.20522	12658	0.99653	-21248	0.55215	-0.0042711	0.95602	-12986	0.04821	14281	0.63332	-0.30882	0.43488	0.082149			0.25566	10046	0.087476	37107	0.21594	0.017615	0.20348	14156	0.64106	-0.69279	0.028969	28418
APMAP	0.92584	-0.60428	0.90107	-0.58194	0.73327	-0.020722	0.56842	-0.14484	0.24745	10144	0.10332	15014	0.97453	-10298	0.93645	-0.57926	0.73394	-0.1935	0.29829	22291	0.52101	-14173	0.63797	-0.57773	0.53323	-18925	0.059305	0.76729	0.54298	0.054403	0.24751	0.43026
APOA1	0.75444	0.22818	0.85126	-0.0077112	0.63182	0.25766	0.31694	0.73817	0.078288	18235	0.96495	-0.45117	0.72307	-0.38096	0.88318	-0.9455	0.79463	-0.2901	0.5797	0.65324	0.57547	-0.18261	0.80106	-0.13129	0.91496	-0.65624	0.80573	-20262	0.62526	0.46562	0.63365	-0.11043
APOA1BP	0.40215	0.87726	0.42385	0.68404	0.51995	0.50859	0.32538	-0.51827	0.33287	0.70747	0.41666	0.65632	0.37912	0.34007	0.44506	0.70218	0.57951	-0.064545			0.9009	-0.79445			0.87375	-13976	0.26864	10969	0.74188	-13658	0.023965	21528
APOA2	0.26905	11535	0.96422	-0.53436	0.98451	-0.42983	0.66699	-0.36483	0.98652	-0.77691	0.89119	-0.10405	0.71502	0.75094	0.015953	25072	0.017608	0.52367			0.5855	-0.039366	0.36927	11559	0.77644	-0.44865	0.68467	-0.18565	0.48769	-14387	0.71149	-0.43519
APOA4	0.30718	0.9541	0.78014	0.32074	0.16784	14665	0.98566	-0.59929	0.58084	0.25991	0.25076	-0.19189	0.67039	0.12875	0.80777	0.15936	0.12346	1573			0.16279	-0.69515	0.95453	-30276	0.32357	-0.98959	0.40644	0.66227	0.58992	-0.90175	0.43599	-0.032169
APOA5	0.23605	10922	0.76345	-0.27557	0.61885	-0.45338	0.13673	0.22563	0.027193	-0.46006	0.73978	-0.033266	0.69338	-0.16855	0.6915	-0.36782	0.30659	0.57315	0.3652	19246	0.85042	-0.24782			0.83885	-0.91836	0.67486	-13825	0.36329	0.7557	0.98989	-24567
APOB	0.010024	23733	0.18601	0.61509	0.34464	-0.56791	0.88324	-0.83044	0.233	1234	0.32392	0.90649	0.98807	-11845	0.032646	0.24184	0.4734	-0.14779	0.091666	40388	0.72028	-0.14041			0.56644	-0.75415	0.86055	-0.76279	0.90322	-0.017228	0.77603	-13991
APOBEC1	0.080668	22936	0.37352	0.44187	0.0065405	20171	0.19774	10684	0.65166	-0.10234	0.36063	10006	0.018445	21448	0.45439	0.64819	0.12644	15053	0.46741	14935	0.86867	-10788	0.41665	-0.35089	0.11285	0.50965	0.001785	25635	0.91726	-0.44343	0.55651	-0.058865
APOBEC2	0.022199	30108	0.16097	0.87006	0.26151	14159	0.32867	0.68782	0.36718	0.27027	0.54964	0.89165	0.30529	12677	0.82904	-0.18658	0.80016	-0.92667	0.83005	0.53763	0.37203	0.4768			0.025708	-11123	0.09207	16966	0.7765	-10034	0.076729	22954
APOBEC3A	0.24464	0.12392	0.99711	-0.77419	0.47457	0.073171	0.0036979	16229	0.91541	0.14553	0.42299	0.56205	0.89613	-1258	0.26668	0.86749	0.87811	-18133			0.99565	-23027	0.093564	32672	0.5266	-11509	0.97827	-14683	0.89609	-14892	0.64237	0.32507
APOBEC3B	0.25351	0.99454	0.41627	-0.033482	0.85977	0.15413	0.0138	16376	0.91113	-0.44219	0.85384	0.18925	0.65053	-0.16379	0.011142	12335	0.78829	-0.68461	0.039189	3223	0.68389	0.26833	0.0228	47077	0.89253	-0.24309	0.8027	-0.73748	0.19491	-11827	0.70259	0.023974
APOBEC3C	0.18738	16303	0.91552	-11186	0.24214	12526	0.026068	0.86173	0.51575	0.11083	0.45247	0.49498			0.47023	0.5651	0.25913	0.71343			0.09029	0.85116	0.19576	24719	0.5592	0.55142	0.74598	-11669	0.77288	-16116	0.67675	-0.80487
APOBEC3D	0.33355	0.79718	0.3086	0.86523	0.50478	0.15325	0.27218	0.77236	0.86568	-0.1971	0.068011	15518	0.50585	0.73807	0.23327	0.46989	0.69798	-0.092931			0.001592	0.64487	0.14465	17681	0.91782	-14892	0.53606	-13146	0.30604	10228	0.76806	-12207
APOBEC3F	0.35316	-0.49901	0.19591	0.69961	0.052135	18838	0.050399	11298	0.40713	0.15947	0.16937	16872	0.68115	0.99449	0.015197	21082	0.5542	-0.39129	0.040874	14834	0.40778	0.79687	0.81177	-17394	0.41851	0.65566	0.31455	0.59494	0.4992	0.60466	0.68342	-0.14757
APOBEC3G	0.16451	12245	0.31024	0.58647	0.21911	12967	0.02714	0.88164	0.60489	0.52549	0.83179	0.37981	0.80197	-0.13972	0.27129	0.30309	0.31668	0.67874	0.74702	-0.4502	0.46302	-0.31493	0.55988	-0.049781	0.99563	-27141	0.41894	-0.070628	0.29242	0.13049	0.72501	-11602
APOBEC3H	0.6138	-0.22566	0.12362	13058	0.30227	0.92684	0.0041472	22796	0.78661	-0.52736					0.1321	15222	0.84819	0.037414			0.6192	-0.15851			0.29899	-0.32183	0.16027	12426	0.047282	28564	0.24904	14949
APOBEC4	0.91247	-0.85294	0.25782	-0.23248	0.23092	11638	0.15298	10192	0.88286	-0.82423	0.76456	-0.31146	0.28648	12223	0.031457	14923	0.48054	-0.25319	0.45514	14456	0.32799	0.79952	0.94508	-29098	0.95522	-11807	0.73377	-0.086763	0.71031	-14325	0.99979	-20715
APOBR	0.54084	0.64531	0.90249	0.042842	0.79634	-0.038453	0.086123	0.91282	0.97794	-17431	0.59893	-0.53659	0.18571	11141	0.25987	0.93278	0.30405	0.50116	0.77406	0.54785	0.099846	14169			0.78605	-15219	0.9713	-25317	0.28378	11905	0.53261	-0.49872
APOC1	0.462	0.45248	0.37953	0.74512	0.78703	0.26674	0.5488	-0.31964	0.98671	-10286	0.94599	0.18599	0.35127	0.76544	0.64628	0.38877	0.57373	-0.18494			0.75708	-18081			0.88183	-12201	0.29105	0.8789	0.25033	13412	0.65388	-0.69452
APOC2	0.83485	-0.00036815	0.67319	0.20992	0.55771	-0.547	0.24588	0.74083	0.86305	-0.15085	0.051087	0.88948	0.085015	14677	0.59376	0.12655	0.87163	-0.11256			0.9951	-25347			0.8107	-11062	0.70802	-0.66629	0.93198	-24703	0.14467	16039
APOC3	0.4072	-0.5799	0.392	-0.42567	0.02845	1415	0.6643	-0.271	0.49294	0.31937	0.037939	18706	0.0057975	21066	0.83121	-0.016823	0.60035	-0.64822	0.21302	30135	0.66505	-0.063806	0.67854	-0.82475	0.86553	-15902	0.33525	-0.1842	0.90135	-0.74624	0.60804	-0.44487
APOC4	0.926	-11867	0.77495	-0.33039	0.17265	11811	0.1773	0.62572	0.34809	0.91242	0.42434	0.66138	0.67077	-0.17731	0.46285	0.41262	0.069474	0.69966	0.32699	11633	0.84287	-0.93217	0.050281	2843	0.1977	-0.68202	0.79559	-17983	0.46546	0.35987	0.97477	-19739
APOD	0.91769	-0.43526	0.85466	0.40183			0.76535	-0.59031	0.69402	0.14679	0.039995	0.71458	0.6627	0.56835	0.15455	12081	0.074238	0.77454	0.23819	27515	0.83135	-0.65024	0.92182	-1388	0.21961	-14471	0.79444	0.029263	0.67378	0.092605	0.95084	-19829
APOE	0.79337	-0.10831	0.14828	-0.12539	0.90585	0.037273	0.2317	0.89503	0.095265	12747	0.64316	0.24596	0.28618	10889	0.10572	1253	0.87151	-11754	0.043626	44638	0.01651	16316	0.70005	-0.5198	0.98909	-0.95455	0.82054	-0.1767	0.3372	-0.013831	0.0036971	27501
APOF	0.49647	0.41463	0.95767	-0.72373	0.69429	-0.0064985	0.7959	0.27535	0.10503	16672	0.36575	0.78222	0.55854	10119	0.19691	12177	0.4399	0.44905			0.3482	0.24272			0.087335	0.37996	0.93322	-22032	0.85325	-0.71452	0.48347	0.2547
APOH	0.3877	0.71914	0.56722	0.32344	0.16812	14252	0.47953	0.51085	0.47593	0.4179	0.7292	0.089134	0.80464	-0.5853	0.93113	-0.14011	0.83776	-0.53209	0.068144	43259	0.98425	-27591	0.08666	28791	0.36539	0.3886	0.30294	0.63699			0.25597	15778
APOL1	0.41467	-0.32818	0.58298	-0.63305	0.24146	0.13004	0.016585	10596	0.79716	-0.7434	0.7182	-0.5618	0.42989	-0.5131	0.20388	0.94963	0.81237	-0.099805	0.67485	0.043708	0.79592	-0.098964	0.46361	12209	0.7082	-0.462	0.80196	-0.041971	0.57663	-0.45941	0.50103	0.74422
APOL2	0.32708	10391	0.68427	0.009542	0.52989	0.97265	0.1896	0.81684	0.28913	11505	0.20734	14178	0.44632	0.70657	0.56607	0.77256	0.9908	-23523			0.22091	-0.49605	0.79079	-0.81632	0.2513	-10107	0.21032	0.84219			0.19227	19402
APOL3	0.1599	1377	0.0017797	0.82737	0.24829	12463	0.010572	12177	0.88744	-10272	0.27546	12429	0.35526	0.72562	0.42129	-0.065576	0.21639	0.15602	0.47819	13238	0.37663	-11954	0.92482	-27075	0.66947	-0.40854	0.47273	-0.075006	0.87798	-0.61562	0.28922	0.22058
APOL4	0.54467	0.92685	0.9815	-0.27324	0.20023	11583	0.0016691	15804	0.17786	15598	0.38145	0.55531	0.88395	-0.17313	0.30995	0.75772	0.71775	-0.33253	0.78641	-0.44154	0.59274	-10275	0.72565	-0.41805	0.027084	-0.4543	0.1083	0.85972	0.75037	-0.82575	0.64202	-1.15
APOL5	0.59862	-0.96587	0.063858	14311	0.19624	10545	0.037773	12282	0.36957	-0.010225	0.59718	-0.3289	0.22502	10164	0.98898	-11383	0.54609	0.29836			0.24352	0.27785	0.33178	12573	0.78162	-0.22188	0.18962	10724	0.2449	13775
APOL6	0.12054	16746	0.35149	0.54857	0.31623	0.52109	0.00019103	18612	0.23224	13722	0.060761	12865	0.96951	-0.92558	0.29395	0.58844	0.1757	14012	0.0030757	58966	0.88076	-15892	0.10794	22617	0.003512	22944	0.33876	0.87619	0.78297	-14034	0.29238	-0.050587
APOLD1	0.53686	0.94098	0.90965	-0.85511	0.13961	15395	0.71647	0.17723	0.26179	12264	0.19804	0.55675			0.80337	0.17277	0.75299	-17032	0.16626	33583	0.64385	-10376	0.93761	-2826	0.045567	13484	0.069633	14307	0.36373	10357
APOM			0.1378	0.76739	0.61138	-0.032552	0.039783	12213	0.88446	0.17939	0.96918	-0.018175	0.34428	11081	0.013868	0.6647	0.092062	0.11254	0.45091	19142	0.50765	0.34137	0.23407	14274	0.26767	0.070987	0.26839	10273	0.13315	-0.10062	0.73288	0.25033
APOO	0.51759	0.14901	0.62187	-0.39756	0.53935	-0.13379	0.53654	0.51595	0.0066508	25313	0.52453	0.81166	0.54188	0.80677	0.8838	-0.20251	0.85216	-17854			0.49283	0.28607	0.67934	0.07508	0.89335	-27731	0.92597	-0.31612	0.065722	16775	0.98696	-15723
APOOL	0.34155	10061	0.73594	-0.021444	0.59569	0.40398	0.15568	10466	0.16383	1117	0.36272	0.99931	0.52409	11011	0.03511	17827	0.6786	-0.049211	0.22648	27756	0.67901	-0.75067	0.74492	-10272	0.63308	-10204	0.26877	0.44182	0.95974	-14789
APOPT1	0.94381	-0.52018	0.94834	-0.63935	0.33914	0.5031	0.93457	-0.86405	0.33104	-0.064289	0.68131	0.49595	0.83937	0.71777	0.72096	0.58097	0.37168	-0.36887			0.76481	-0.16577	0.68266	-0.83352			0.13349	-0.18529	0.21866	14689	0.3948	0.82558
APP	0.76529	0.16968	0.6509	0.0073347	0.11934	11854	0.51244	-0.15374	0.23676	0.28742	0.10443	12895	0.83202	0.037511	0.97064	-0.70419	0.98364	-0.58492	0.20644	26413	0.58489	-0.50966	0.56565	-0.26717	0.097649	1467	0.64988	-0.62421	0.60608	-0.14128	0.020552	32842
APPBP2	0.71744	0.37445	0.78348	-0.077796	0.72372	0.57603	0.72438	0.0094233	0.68516	-0.27427	0.81729	0.31482	0.78657	0.74667	0.40362	-0.18504	0.11557	0.63034			0.94018	-0.73654	0.98805	-25859	0.088169	-0.24795	0.7999	-17495	0.14831	19016	0.87643	-12588
APPL1	0.79409	0.39039	0.33309	0.5203	0.37832	0.15804	0.12226	10451	0.44941	0.72509	0.74596	0.64212	0.87606	-0.093476	0.19455	0.98924	0.26208	0.082323	0.89128	-0.68321	0.64201	-0.34977	0.36794	10446	0.73547	0.18249			0.70222	0.31762	0.062073	30078
APPL2	0.46041	0.43145	0.87615	-0.18496	0.20207	0.72896	0.97833	-0.85864	0.70259	0.62315	0.097645	15393	0.23687	0.23008	0.41577	0.1957	0.041877	1267	0.089847	39992	0.73005	0.47811	0.26381	11485	0.040483	23109	0.92695	-0.42844	0.68455	-0.17518	0.53307	-0.62184
APRT	0.25176	0.10103	0.79473	-0.12696	0.075021	18093	0.59029	-0.014632	0.53155	-0.49072	0.95156	-0.24418	0.3959	0.90297	0.26946	-0.0014083	0.38504	-19982	0.99943	-34505	0.98947	-0.84035	0.96508	-31398	0.98319	-1653	0.57564	0.051149	0.8414	-0.51107	0.72305	-0.45348
APTX	0.90938	-0.3463	0.85961	-0.26061	0.70122	0.057991	0.23026	0.32578	0.90701	-11491	0.14499	13634	0.58528	-0.2882	0.54572	0.51333	0.12715	0.88115			0.083517	-0.3915	0.12664	20486	0.15573	13776	0.35138	0.73948	0.91449	-0.00060697	0.52282	-20197
AQP1	0.1264	17028	0.81135	-0.65026	0.68008	0.68567	0.83011	0.068108	0.58456	0.78558	0.91618	-0.27154	0.80247	-0.19834	0.76555	0.14301	0.88078	-17983	0.73346	-0.38613	0.2058	10351	0.33741	11258	0.4581	0.37041	0.93347	-22113	0.32262	-0.46197
AQP10	0.57796	0.095508	0.37108	0.14038	0.80228	-0.63234	0.60313	-0.11512	0.8864	-0.19043			0.83925	0.071603	0.57806	0.0604	0.89292	-15314			0.96543	-26768	0.7651	-10105	0.49636	-0.054982	0.58889	-10679	0.45795	0.42852	0.36876	-0.8847
AQP11	0.0096044	1977-01-01	0.4185	0.44001			0.40048	0.38243	0.74842	-0.021631			0.14083	15734	0.89466	-10333	0.88669	-11185	0.2769	24728	0.7095	-0.040125	0.3561	1295	0.34083	0.73396	0.035123	0.72098			0.20035	1789
AQP12A	0.94249	-0.71909	0.95866	-0.74435	0.24311	11309	0.78371	-0.64587	0.18935	17501	0.10708	14288	0.34164	11672	0.82555	-0.14526	0.74146	-0.36112	0.92637	-22734	0.0975	12507	0.11953	34018	0.51701	0.69138	0.78688	0.11132	0.60625	-10266	0.93429	-21387
AQP12B	0.60229	0.65552	0.64547	0.45694	0.38472	0.37973	0.56901	-0.087077	0.64373	-0.25449	0.32519	0.74728	0.30699	-0.14638	0.45228	0.38495	0.75099	0.12753	0.099372	31021	0.66634	-0.78375	0.76901	0.01043	0.99528	-23886	0.71981	-0.30039	0.15533	-0.12019	0.55358	0.39455
AQP2	0.54268	10189	0.41598	-0.14929	0.62351	-0.13067	0.78449	0.057141	0.67524	-0.0333	0.38061	0.92186	0.30172	12755	0.65456	-0.25372	0.6799	-10591	0.44243	1562	0.1	20561	0.18666	27117	0.47279	0.62329	0.69091	0.0097068	0.978	-23874	0.49768	0.55945
AQP3	0.46299	0.20659	0.25388	0.083794	0.50593	-0.36	0.62538	-0.10907	0.0085436	21027	0.97592	-0.81622	0.4316	0.078049	0.75549	0.21501	0.63505	0.33087	0.303	25113	0.7013	-14387	0.35199	12631	0.27622	10548	0.15316	-11845	0.65976	-0.69233
AQP4			0.53664	0.46623	0.14233	14437	0.76447	0.22353	0.30365	0.47131	0.57285	-0.21309	0.62044	-0.91916	0.4923	0.067461	0.086237	-0.82146	0.23609	0.4683			0.358	0.3496	0.16034	1734	0.0074114	20814	0.9875	-12421	0.021607	23776
AQP5	0.66397	-0.34226	0.82364	-0.092329	0.16139	0.93449	0.065445	13735	0.086035	18155	0.88445	0.30764	0.62675	0.56061	0.68501	-0.31568	0.65313	-0.71564	0.32568	23208	0.51054	0.30723			0.48508	0.61026	0.094994	14057	0.18575	1539	0.91263	-12178
AQP6	0.80954	-0.70494	0.16988	-0.22238	0.92537	-0.013788	0.11207	10643	0.79779	0.59145	0.71465	0.065392	0.5853	0.20725	0.74148	0.09641	0.65638	-0.31108	0.73542	-0.40565	0.88128	-10804	0.90884	-0.96898	0.70184	0.30181	0.88429	-0.3505	0.97913	-16101	0.99903	-32754
AQP7	0.198	13838	0.7519	0.065038	0.89298	0.3151	0.14203	0.80998	0.60159	0.82381	0.90123	0.22171	0.2877	0.92356	0.38214	0.59074	0.62741	-0.059553	0.89212	0.0047805	0.93054	-0.88339			0.29365	0.95165	0.5152	0.07401	0.88335	-0.075157	0.18297	19409
AQP8	0.072711	16114	0.87285	0.079533	0.74048	0.38273	0.091402	-0.4013			0.92338	-0.60688	0.02923	27029	0.48458	0.29238	0.64871	-0.8631			0.15331	-0.7324	0.26563	18812	0.48283	-0.47601	0.066968	16498	0.84217	-19776	0.65831	-14881
AQP9			0.065798	13992	0.12319	13266	0.7118	-0.60077	0.8727	-0.37357	0.7708	0.11782	0.77319	-0.37257	0.60833	0.54974	0.14088	10235			0.45874	0.22752			0.80179	-0.57475	0.20553	0.47309	0.36376	0.22773	0.40196	0.40071
AQPEP	0.57803	0.081169	0.98733	-0.56201	0.88412	-0.21283	0.38539	0.39358	0.78643	-0.49775	0.30178	0.23917	0.50015	0.84355	0.56534	-0.13737	0.38068	0.15315	0.087893	39567	0.25356	-0.25946	0.13724	31032	0.047175	20238	0.56837	-0.39773	0.67999	0.30761	0.77907	-13468
AQR	0.041378	17775	0.98561	-10573	0.97741	-0.74146	0.50398	-0.44634	0.60463	0.25048	0.2917	11044	0.098251	14507	0.49469	0.30831	0.11151	11771	0.7495	-0.50192	0.16722	0.87063			0.19102	1233	0.31184	0.84134	0.21782	1631
AR	0.60703	-0.18531	0.033526	12245	0.92204	-0.66156	0.38662	-0.68549	0.65275	-0.51194	0.84259	-0.58532	0.53633	0.7706	0.93914	-0.15145	0.22316	0.47746			0.59894	-19048	0.62231	-0.072027	0.91632	-18816	0.75008	0.19514	0.25954	0.79128	0.017729	20183
ARAF	0.36099	0.2407	0.078383	-0.13147	0.86836	-0.46927	0.91287	-0.75388	0.47476	0.821	0.69466	0.30564	0.63983	-0.66014	0.59307	0.33973	0.29066	0.52975	0.54431	15988	0.22812	10045	0.33173	13773	0.58156	0.077514	0.95894	-0.66197	0.8981	-1254	0.64096	-0.56891
ARAP1	0.45348	0.79182	0.03903	0.5523	0.46339	0.13389	0.36141	-0.23216	0.42641	-0.097186	0.16716	13232	0.16504	15049	0.34002	0.85075	0.80014	-0.60886			0.84791	-0.49834	0.7632	-0.96729	0.57959	0.19572	0.49257	0.52606	0.45738	0.46977	0.44051	0.071461
ARAP2	0.56112	0.70776	0.38015	0.40498	0.3376	0.98136	0.1868	0.35725	0.56507	0.18731	0.041108	19304	0.41274	0.78021	0.19445	0.92744	0.73992	-14976			0.055264	16643	0.84566	-11578	0.24491	0.35465	0.86935	0.4127	0.46477	-0.96006	0.54329	-0.3918
ARAP3	0.61701	0.70467	0.31469	0.58466	0.98937	-18656	0.94187	-0.93951	0.77352	0.13337	0.9347	-0.36912	0.50414	0.35651	0.55172	-0.6043	0.24244	0.83445			0.35037	-0.92834	0.19965	24463	0.66273	-0.64568	0.487	0.22513	0.65537	-0.79253	0.079008	-17561
ARC	0.95524	-14196	0.6063	0.43227					0.20546	14162	0.70885	-0.20977	0.55749	0.7593	0.64078	0.53913	0.50323	-0.099065	0.075561	4406	0.27219	0.99049			0.5312	-0.44066	0.50286	-0.0016592	0.95611	-30444	0.39248	0.82561
ARCN1					0.046684	0.86305	0.94163	-0.80165	0.89875	-0.57948	0.97999	-0.83389	0.97679	-1106	0.015496	10926	0.77737	-0.98691			0.067461	0.9661					0.29232	0.91362	0.19324	14295
AREG	0.56258	0.073829	0.67724	0.29591	0.19816	0.90999	0.59012	0.24175	0.52486	0.62837	0.76285	-0.058656	0.94998	-0.366	0.3413	0.78852	0.92318	-0.98973	0.63354	12127	0.32269	0.58224	0.56819	0.3474	0.44756	0.28171	0.79496	0.4241	0.68951	-0.017725	0.49042	0.5114
ARF1	0.69979	-0.095517	0.19811	0.5493	0.78259	-0.009035	0.31394	-0.04327	0.99833	-14015	0.12242	0.15811	0.88148	-0.026284	0.84934	-2148	0.30414	0.50994	0.6083	13009	0.2706	-0.18404	0.63213	-0.55278	0.62074	-0.86184	0.76547	-0.65131	0.6271	-0.95572	0.73769	-0.66318
ARF3	0.25112	11175	0.41433	-0.3418	0.37138	0.74393	0.26084	0.88596	0.10891	2014-02-01	0.78381	-0.23157	0.86262	-0.7787	0.74308	0.70729	0.79806	-0.2274	0.072333	41322	0.042917	17312			0.55562	-0.30266	0.75242	0.066927	0.80207	-10398	0.65439	-0.6977
ARF4	0.44801	0.81052	0.78785	-0.38867	0.88327	-0.0010653	0.78307	-0.15357	0.5868	0.63456	0.59702	0.089382	0.040965	15367	0.65857	0.24067	0.0028647	19441			0.238	12033			0.16265	17346	0.50355	-17052	0.097285	0.46074	0.61271	-0.45407
ARF5	0.44191	0.45486	0.35671	0.71443			0.57757	-0.0030976	0.57282	0.14754	0.11549	0.6685	0.89248	-0.62295	0.74599	-0.25889	0.025588	20901			0.82623	-0.092296	0.37478	11082	0.69818	-11204	0.89957	-0.32045	0.75136	0.43067	0.66863	-0.053967
ARF6	0.1421	0.39077	0.53446	0.46225	0.84733	-0.055172	0.048257	-0.88626	0.69251	-0.62836	0.091762	0.93904	0.22616	0.82609	0.71595	-0.76583	0.6692	-0.058551			0.46769	-0.89542	0.57373	0.54947	0.62157	-0.5719	0.56742	-0.85619	0.7128	0.2602	0.67902	-0.77221
ARFGAP1	0.19614	14909	0.4991	-0.19079	0.97375	-15289	0.55866	-0.76412	0.92738	0.064882	0.94157	-0.9557	0.53361	-0.14752	0.96722	-0.43505	0.71208	-16554	0.44608	15124	0.3834	-0.17166	0.831	-18875	0.99013	-28516	0.72952	-0.31868	0.30167	-0.41105	0.42657	0.85524
ARFGAP2			0.82961	-0.71054	0.74117	0.58071	0.91278	-0.21787	0.50859	0.43843	0.2247	12339	0.84913	0.25098	0.24986	-0.50188	0.033697	15381			0.45302	-0.5275	0.10421	2283	0.27736	0.9892	0.61463	0.076665	0.87241	-0.15903	0.63854	0.32688
ARFGAP3	0.19517	13754	0.61151	0.0035822	0.089887	15633	0.367	17051	0.062039	18546	0.30114	12143	0.48304	0.44771	0.35959	0.78262	0.86862	-11663	0.2695	26003	0.22071	13709	0.30716	10203	0.39602	0.7087	0.55513	0.019502	0.859	-14969	0.58753	0.22084
ARFGEF1	0.50012	0.98766	0.76389	-0.4764	0.46142	0.78976	0.8938	-0.46868	0.98492	-12375	0.017939	0.33409	0.11709	13413	0.88754	0.32243	0.57714	-0.54929			0.62447	0.16149	0.49811	0.31082	0.99468	-17353	0.31113	0.074421	0.18647	1222	0.56751	0.51677
ARFGEF2	0.78267	-0.61894	0.10715	0.92856	0.75502	-0.044223	0.39796	0.11684	0.33941	10142	0.79128	0.095431			0.82971	-0.77381	0.027072	14605	0.458	1424	0.54308	-11442	0.20127	24076	0.061475	1979-01-01	0.0028513	14616	0.25002	0.7342	0.87482	-0.65935
ARFIP1	0.25095	11299	0.49534	-0.89966	0.30325	0.95769	0.73409	-0.072638	0.10983	20311	0.59216	0.25435	0.19293	0.16947	0.034261	0.64101	0.66444	-0.54272	0.60209	13438	0.65151	-0.78426	0.77878	-0.59634	0.021042	0.61888	0.56838	-0.17101	0.47011	0.48336
ARFIP2	0.043738	20105	0.89433	-0.28346	0.40516	0.68563	0.081373	-0.25186	0.8682	-0.70593	0.2432	10989	0.28175	14166	0.12953	-0.45218	0.63883	-0.83176	0.27636	27163	0.92886	-13412	0.44407	11238	0.33377	0.31211	0.063937	1784	0.91246	-17702	0.56707	-0.43681
ARFRP1	0.83109	0.218	0.94703	-0.25989	0.041397	-0.025268	0.63797	-0.1229	0.13527	-0.38413	0.80717	0.12965	0.81796	-0.53504	0.1626	1179	0.63302	-0.70761	0.59615	0.6088	0.5796	0.29718	0.21363	23477	0.70949	-0.691	0.70727	0.38652	0.33171	10675	0.82427	-20987
ARG1	0.64577	0.13899	0.71198	0.31022	0.021331	11049	0.19795	0.048824	0.94604	-14942	0.26596	0.55069	0.88795	-0.37408	0.87101	-0.8491	0.49543	-0.50415			0.71738	0.06323	0.90134	-20351	0.44104	-17184	0.89732	0.053731	0.94397	-11932	0.18303	16804
ARG2	0.12695	0.4201	0.89249	-0.12405	0.89056	-0.77631	0.57854	0.10333	0.3956	-0.33347	0.35123	-0.022411	0.64907	0.24712	0.85545	-0.4086	0.90521	-0.7231	0.25131	19555	0.39816	0.55425	0.79501	-28105	0.82509	-12641	0.41991	-10682	0.12892	12622	0.72738	-0.71213
ARGFX	0.57767	0.077319	0.63732	-0.16033	0.83479	-0.71254	0.22516	0.76037	0.095817	20134	0.21913	11923	0.48886	11807	0.23933	10211	0.013379	10956			0.51144	-0.19425	0.86887	-22018	0.13409	17966	0.96964	-30538	0.64813	-0.80896
ARGLU1	0.18241	17193	0.21011	0.45354	0.71548	0.31678	0.91269	-1178	0.81142	-0.51658	0.96327	-0.66622	0.96228	-0.71905	0.53085	0.51997	0.63016	0.078972	0.26461	26018	0.055846	17608			0.23372	-0.77189	0.36522	0.60711	0.49312	0.64904	0.89793	-14255
ARHGAP1	0.025973	18204	0.020234	2365	0.10155	19451	0.35159	0.64843	0.14921	0.76151	0.25593	12507	0.32035	12266	0.019903	27268	0.3328	-0.37699	0.030051	42923	0.23572	0.081608	0.32769	12566	0.29231	0.57153	0.35771	-0.66404	0.83594	-20034	0.078095	21939
ARHGAP10			0.2335	-0.41291	0.9525	-0.44205	0.62217	0.4384	0.6337	-0.0079989	0.09503	0.24113	0.82315	-0.040664	0.81313	0.25964	0.96447	-0.986	0.72699	-0.32212	0.9977	-23667	0.066529	39777	0.19544	1306	0.76018	-0.88459	0.71202	-0.16169
ARHGAP11A	0.5468	0.94385	0.80025	0.32774	0.51795	0.95306	0.48996	0.59116	0.24963	0.62455	0.40699	0.75475	0.14461	15373	0.59199	0.096381	0.72263	-0.75928	0.75379	-0.49934	0.98926	-25685	0.16594	28963	0.54634	0.3807	0.9909	-1868	0.9139	-14128	0.24931	15779
ARHGAP11B	0.97453	-0.68119	0.50538	0.67631	0.38963	0.70133	0.3119	0.77526	0.0099289	19813	0.71506	-0.027795	0.65108	0.69332	0.48742	0.76716	0.0809	14737	0.21882	21257	0.20662	13166	0.45678	0.58185	0.59613	-0.69162	0.042558	-0.0091087	0.78818	-16533
ARHGAP12	0.70913	-0.28755	0.081447	13587	0.93363	-0.3791	0.33676	0.16177	0.8039	-0.5898	0.06069	15126	0.21157	16176	0.33711	0.50287	0.70621	-0.54565	0.5588	16383	0.60449	-12239	0.62674	-0.51056	0.6901	-0.74199	0.53742	0.50907	0.85745	-21762	0.23959	18138
ARHGAP15	0.29236	0.59683	0.49112	0.18862	0.24097	11797	0.53038	0.28828	0.45958	0.43357	0.84867	-0.34298	0.49191	0.28479	0.73636	0.18724	0.28856	0.089092	0.43221	-12886	0.84297	-11283			0.75048	-16742	0.47517	-0.19669	0.96391	-11626	0.066635	24125
ARHGAP17	0.67052	-0.18815	0.68752	-0.14382	0.016243	2164	0.21618	0.083815	0.011172	27634	0.58708	0.28219	0.28173	-0.50085	0.90977	0.17299	0.65143	-13651	0.3139	13472	0.080364	12616	0.057224	3694	0.85972	0.30929	0.8958	-0.90462	0.81749	-0.92856	0.74145	-0.60729
ARHGAP18	0.28521	0.56341	0.67269	0.31874	0.0010193	27181	0.93075	-0.24483			0.74606	-0.35552	0.94412	0.50549	0.099457	0.75731	0.18673	0.7606			0.3169	-0.25402	0.86155	-1287	0.1316	18986	0.10555	1951	0.66632	-0.91424	0.97627	-32408
ARHGAP19	0.19354	-0.59201	0.90617	-0.43727	0.64541	-0.10352	0.92237	0.10246	0.74677	-0.92101	0.84673	-0.44867	0.94364	-12894	0.76571	0.4777	0.30304	-0.29063	0.15178	33755	0.27428	0.98513	0.26113	0.25059	0.40853	0.6801	0.11562	16142	0.75312	-18179	0.40005	0.30607
ARHGAP20	0.069865	0.35296	0.8066	-13801	0.5498	-0.070937	0.51785	-0.44343	0.69619	-0.32129	0.010968	25637	0.29311	0.20712	0.58511	0.84263	0.28201	0.56083	0.47966	19934	0.38286	0.52843			0.98974	-16728	0.15797	16439	0.67605	-0.29567
ARHGAP21	0.32691	0.97668	0.74295	0.13531			0.067537	18398	0.34251	0.19206	0.09363	1349	0.6133	0.092638	0.52186	0.23855	0.74682	-18744	0.0065903	5559	0.33902	0.16855	0.34234	13206	0.13712	17814	0.0029632	41394	0.0817	17311
ARHGAP22	0.94745	-0.082977	0.80927	-0.66934	0.15366	0.46706	0.068239	10626	0.92166	-0.38929	0.91017	-10416	0.34275	1242	0.28911	0.52454	0.28076	0.93643	0.0031056	38713	0.43755	-0.12557			0.43977	-0.39202	0.049465	22602	0.89418	-15177	0.93103	-12221
ARHGAP23	0.27576	0.44396	0.3458	0.61217	0.50051	0.26034	0.021461	20172	0.13351	15527	0.21214	0.93333	0.31011	10597	0.9926	-0.85517	0.063045	13978			0.73438	-0.75501	0.2878	0.44711	0.88384	-0.87854	0.71279	-0.089889	0.99142	-1987	0.48463	-16145
ARHGAP24	0.32358	10752	0.34742	-0.89553	0.43501	10175	0.032909	13949	0.042772	0.97863	0.25607	-0.41954	0.02336	2015	0.063817	11968	0.59956	-0.73122	0.22687	28486	0.42152	-0.60767	0.81714	-1779	0.0003914	-0.72319	0.34935	0.88255	0.9218	-31588	0.87345	-0.056419
ARHGAP25	0.98485	-11341	0.28601	0.23439	0.071526	18542	0.14417	10847	0.035442	1961	0.14178	1345	0.62356	0.85219	0.70197	0.26991	0.10242	0.80407			0.38502	-0.11905	0.63046	-0.50081	0.16817	12556	0.081968	19033	0.7119	-10673	0.97339	-12477
ARHGAP26	0.76527	0.20687	0.19663	0.60278	0.39074	0.90429	0.72132	0.36386			0.043316	14092	0.79318	0.5239	0.16694	0.93501	0.27699	0.644	0.37676	2074	0.19624	12797	0.064106	3158	0.30633	-0.70403	0.26584	11428	0.10668	0.92354	0.9117	-11917
ARHGAP27	0.27333	13632	0.51702	0.091785	0.048163	27852	0.17251	0.9916			0.87003	-0.79869	0.30209	0.92652	0.15252	13723	0.097964	12057	0.77045	-0.65505	0.69408	0.38501	0.30683	16297	0.0061009	29127	0.4528	0.64434	0.019023	35232	0.86142	-0.41347
ARHGAP28	0.098176	12545	0.026478	15436			0.80396	0.050458	0.92532	-0.024937	0.66936	-0.12523	0.05342	26476	0.51048	-0.016821	0.70003	0.1564	0.9529	-26918	0.36405	0.73172	0.02602	2099	0.61838	-0.50867	0.48137	-0.32	0.67907	-19752	0.44037	0.076776
ARHGAP29	0.28148	11217	0.19397	10727	0.11504	13295	0.35916	0.75636	0.90792	-10629	0.049304	12959	0.17942	18185	0.5804	-0.056449	0.039213	20384			0.39833	-13263			0.25262	10903	0.39335	-18445	0.27208	12479	0.88097	-0.28571
ARHGAP30	0.37437	0.87702	0.32805	0.50044	0.095277	11125	0.46923	0.50278	0.13186	13259	0.78869	0.33761	0.11025	19029	0.033906	16021	0.10838	0.81304			0.74005	-23125	0.70024	-1207	0.70013	-0.52486	0.5694	0.39886	0.71882	-17871
ARHGAP31	0.65491	0.40624	0.35273	0.75752	0.4761	0.46038	0.89056	-0.28209	0.76448	0.3401	0.28203	0.94478	0.57486	0.85038	0.18944	0.99919	0.24266	0.34185			0.53198	-0.031749	0.68834	-10396	0.61036	-11703	0.23333	-0.27564	0.57155	-0.097508	0.19988	14194
ARHGAP32	0.48577	0.65313	0.43393	0.16083	0.26526	10952	0.5782	0.053466	0.026062	33734	0.31462	10253	0.34206	0.64434	0.94406	-0.82404	0.78783	-0.3344			0.3539	0.75686	0.22437	21659	0.35286	0.60174	0.78652	-0.61855	0.79733	-17164	0.54268	0.47651
ARHGAP33	0.63087	0.51314			0.12465	16471	0.48904	0.66711			0.063823	15342	0.061159	22286	0.39683	0.90501	0.46239	0.43764	0.23997	27096	0.22464	0.12228	0.87107	-22165	0.56595	0.32086	0.051492	25235	0.89668	-0.20876	0.071695	18891
ARHGAP35	0.59907	0.0088759	0.77801	-0.26064	0.78273	0.032185	0.099137	12572	0.54367	0.42164	0.36789	0.74036	0.6162	0.82031	0.13533	12587	0.91202	-13406	0.31163	22924	0.67002	-0.88695			0.2297	0.92874	0.42998	0.66943	0.44894	-10263	0.21712	17905
ARHGAP36	0.94702	-0.70803					0.79649	-0.78561	0.8458	-0.81275	0.97872	-0.91766	0.90294	-0.98129	0.38808	0.50406	0.56361	-0.62981			0.55689	0.016168	0.95436	-21791	0.2825	12081	0.21249	0.25193	0.40309	0.86657
ARHGAP39	0.81763	-0.025932	0.75948	0.57899			0.035413	14754	0.90098	-10359	0.38252	12152			0.18463	10784	0.55024	-21022	0.40277	17581	0.98323	-0.97575			0.53363	0.60703	0.54584	0.4978	0.42474	0.78027	0.10076	24932
ARHGAP4	0.50577	0.7745	0.5162	0.033489	0.97931	-10236	0.90757	-0.002576	0.67297	10663	0.61819	0.032752	0.11706	12915	0.57715	0.05928	0.84055	-0.72415	0.48632	13239	0.2029	10629	0.85725	-20995	0.44015	-11863	0.10589	-0.26473	0.0012845	37366	0.61872	-0.49358
ARHGAP40	0.56058	0.25498	0.69474	-0.047002	0.78587	-0.28148	0.17787	0.95275	0.78659	0.35817	0.65007	0.58234	0.95789	-0.8022	0.8482	-0.95371	0.31732	0.65582			0.16195	11144	0.18108	2708	0.24204	-0.44541	0.54033	-10516	0.927	-12912	0.053525	3357
ARHGAP42	0.037051	21681	0.25202	0.87889	0.89774	-0.9642	0.57668	0.38795	0.40684	10399	0.049391	18964	0.85131	-0.69236	0.51363	0.64064	0.93305	-13346			0.23121	0.93527	0.072265	38919	0.694	-0.75681	0.61204	-0.57801	0.88489	-23934	0.75059	-12528
ARHGAP44	0.92489	-0.78676	0.29418	0.65177	0.49436	0.37346	0.059798	0.96966	0.71808	-0.197	0.11609	17781	0.501	0.49112	0.86087	-0.19397	0.5904	-17441	0.75999	0.5914	0.66809	-12208			0.59583	-0.056873	0.9787	-13293
ARHGAP5	0.67028	0.091063	0.68356	0.075809	0.84629	-0.12744	0.92974	0.056542	0.32314	0.89223	0.50169	0.62584	0.34097	0.41587	0.96834	-0.39051	0.15621	10758	0.63297	0.32713	0.58831	-0.32807	0.1603	29136	0.15443	-11314	0.74855	-0.29432	0.16319	11696	0.56289	-0.7265
ARHGAP6	0.32816	11927	0.93813	-0.36184	0.37416	0.72839	0.79404	0.3088	0.95001	-0.03648	0.3582	0.2345	0.44756	0.25399	0.76935	0.32507	0.081635	-0.32847	0.15315	36175	0.087652	10075	0.72714	-0.69224	0.69725	0.041433	0.56731	-0.33595	0.31133	10728	0.075476	28578
ARHGAP8	0.31342	10688	0.48339	0.59028	0.33119	0.29994	0.0039631	14918	0.30223	0.31175	0.0635	15094	0.15849	15858	0.89459	0.080717	0.74265	0.09659			0.92764	-16844			0.7069	-11621	0.60841	-0.11034	0.15918	1857	0.9051	-13521
ARHGAP9	0.93167	-0.6744	0.49669	0.075379	0.61923	0.11316	0.43625	0.44671	0.72434	0.060768	0.8485	0.37724	0.011789	31271	0.45849	-0.36429	0.6083	-10814			0.11391	-0.0053142	0.087715	16248	0.92629	-16297	0.12604	19306	0.23395	0.54658	0.87543	-2167
ARHGDIA	0.7641	-0.44855	0.16196	2022-12-01			0.61196	0.28327	0.83015	0.52871	0.57979	0.17524	0.88284	-0.85204	0.10824	12503	0.21342	0.41036	0.73774	-0.37898	0.43404	0.17162	0.73243	-11821	0.019394	2633	0.87532	-19282	0.61855	-1217	0.93857	-21743
ARHGDIB	0.532	0.8499	0.70948	-0.23			0.055378	12678	0.55225	0.034946	0.63071	0.25954	0.01154	28326	0.21854	1096	0.32121	0.84486			0.31713	0.45758	0.055384	29051	0.31764	0.93916	0.83867	-0.20649	0.38217	-12643	0.65287	-11811
ARHGDIG	0.1491	12125	0.62833	-0.24514	0.96817	-0.86489	0.52589	0.14455	0.7013	0.088921	0.50613	0.66238	0.95427	-13226	0.096287	1231	0.32973	0.74759	0.9678	-29355	0.74016	-0.4827			0.52391	0.28504	0.77544	-0.70048	0.12082	17503	0.29386	0.059407
ARHGEF1	0.1667	15315	0.61724	-0.11254	0.10765	1354	0.19729	0.66998	0.20671	14136	0.89843	-0.43502	0.68817	0.22568	0.28454	0.78011	0.13076	12864			0.7777	-0.39237	0.081146	3842	0.5233	0.45765	0.86077	-0.29123	0.07903	13614	0.028411	30195
ARHGEF10	0.94764	-0.68077	0.44433	0.33496	0.24671	0.70524	0.44512	0.14213	0.67182	10035	0.59188	-0.43162	0.94185	-0.041938	0.96087	-0.86111	0.60322	-0.054569	0.95645	-14489	0.32161	0.98426	0.77089	-14528	0.04607	19489	0.19663	0.65432	0.40503	0.82662	0.12098	24383
ARHGEF10L	0.83367	-0.38896	0.59814	0.11192	0.10037	2062	0.89948	-0.26059	0.58553	0.49144	0.12007	12392	0.45269	0.25905	0.026189	16852	0.34881	0.12345			0.023629	24421			0.23381	12713	0.44452	-12083	0.32117	0.35059
ARHGEF11			0.029998	0.23003	0.59339	0.4317	0.97831	-11007	0.4669	0.43352	0.99338	-11271	0.50963	0.13658	0.33801	0.76777	0.94404	-0.88739	0.22045	29629	0.67665	-0.59712			0.74139	-0.072726	0.50131	-0.25567	0.21473	0.99858	0.11383	12657
ARHGEF12	0.020785	32908	0.25717	0.73361	0.11125	19182	0.4127	0.048688	0.19429	14146	0.88702	-0.70783	0.29929	13032	0.56279	0.11257	0.61301	-0.32617	0.09703	39118	0.52688	-0.28002	0.37714	10005	0.65066	-12403	0.40047	0.24917	0.21708	11891	0.50739	-0.049621
ARHGEF15	0.89997	-0.044416	0.68802	-0.45295	0.68202	0.64462	0.8164	0.092832	0.39162	0.8536	0.49824	0.41175	0.28471	0.12123	0.019873	21383	0.6451	-0.72147			0.93961	-19373			0.40623	0.084181	0.25374	0.24652	0.42161	-0.30094	0.68288	-0.73248
ARHGEF16	0.56826	0.048824	0.6871	0.52598	0.19263	11699	0.083526	12588	0.26272	13663	0.69254	0.51723	0.107	11793	0.60497	0.58447	0.64015	-0.93387	0.86303	-15422	0.99706	-25642	0.6963	-0.92919	0.21261	0.15871	0.48244	-0.40756	0.76875	-0.2074
ARHGEF17	0.60601	0.10266	0.56147	0.093336	0.5323	0.28667	0.87045	0.15018	0.53553	0.71025			0.41281	0.38068	0.79544	-0.63685	0.56393	-0.35449	0.70334	-0.12427	0.036428	20885			0.46962	0.26779	0.70475	-0.71257	0.46784	-0.30446
ARHGEF18	0.80763	0.14858	0.30169	0.2534	0.041045	0.60877	0.74927	-0.10079	0.10992	20301	0.93358	-0.33863	0.29841	10451	0.77127	-0.42324	0.45941	0.13618			0.80146	-20495			0.5658	-0.11469	0.45527	0.78725	0.5728	-11634	0.38561	-23425
ARHGEF19	0.29668	0.9316	0.53921	0.0095987	0.49502	0.71557	0.55365	-0.0094849	0.54487	0.23305	0.25917	-0.14227	0.11857	15055	0.73281	-0.37144	0.44088	-0.41211	0.88799	-18058	0.086078	10237	0.89553	-17571	0.14484	17214	0.44702	-0.8044	0.51012	-13745	0.70279	-0.9783
ARHGEF2	0.73731	-0.080858	0.1303	10909	0.14032	0.23903	0.46309	0.75149	0.59099	0.84652	0.57111	-0.28679	0.81266	-0.58394	0.079645	-0.19252	0.65615	-0.84054			0.46778	0.021911			0.94806	-19982	0.11768	18423	0.9479	-22067	0.4571	0.71257
ARHGEF25	0.66779	-0.09335	0.65834	-0.18295	0.72413	0.22533	0.50052	0.32057	0.1197	-0.58798	0.77935	0.11102					0.90033	-0.47553			0.83149	-27455			0.28021	10157	0.51465	0.19215	0.23747	1436	0.15614	22172
ARHGEF26	0.39956	0.84927	0.39878	0.15649	0.17774	1313	0.74865	0.44377	0.13335	20672	0.81963	0.48584	0.061244	19743	0.68939	0.11482	0.61204	0.30615	0.38542	18986	0.98446	-12956			0.76246	-1528	0.10401	15399	0.5795	-0.22591	0.23346	14063
ARHGEF28	0.55835	-0.21777	0.11246	11313	0.37994	0.77282	0.63373	-0.29685	0.60222	0.22451	0.0016715	22619	0.74798	0.83398	0.91021	-0.22698	0.95867	-0.76518	0.89649	-19166	0.65789	0.30665			0.38475	-0.32595	0.15772	0.99711	0.54992	0.41429	0.52666	-13397
ARHGEF3	0.25116	13042	0.7384	-0.075452	0.86321	0.30681	0.63992	0.27365	0.75215	-0.069915	0.39005	0.62087	0.47681	11088	0.38404	0.60618	0.41464	0.59572	0.66677	0.11124	0.28338	-0.4721	0.65178	-0.62811	0.66393	-13789	0.74417	-0.99166	0.096464	24873	0.26953	14413
ARHGEF33			0.15728	10087			0.54832	0.43664	0.032022	31024			0.69518	0.1947	0.034439	14908	0.65449	0.28714			0.78918	-0.45347	0.19357	14452	0.7877	-1219	0.38464	-0.49357	0.012728	2022-02-02	0.040311	33797
ARHGEF35	0.91313	-0.8755	0.54474	0.37382			0.41109	0.74077	0.38196	0.73031			0.69088	-0.21846	0.63953	-0.17743	0.4246	0.22672			0.86075	-11881			0.12947	-0.47215	0.2201	14453	0.6685	-0.93864	0.75591	-12999
ARHGEF37	0.8728	-0.40531	0.98925	-0.42488	0.7838	-0.014763	0.79642	-0.29671	0.52714	0.47003	0.41018	0.28481	0.46744	0.56701	0.93171	-0.45817	0.83997	0.13338	0.19648	30785	0.80839	-0.81415	0.23719	10246	0.96686	-12307	0.79011	-0.21835	0.97574	-33099	0.92067	-0.62699
ARHGEF38	0.70403	0.84768	0.27109	0.64664			0.29568	-0.14412	0.89796	-0.39417	0.95367	-0.57093	0.64295	0.75776			0.25804	0.68075	0.49959	12314			0.05826	42213	0.16492	10469	0.3492	0.44751	0.83061	-0.7957	0.69248	-0.61424
ARHGEF39	0.067223	18495	0.040469	13988	0.37012	0.93046	0.65684	-0.24467	0.034448	11649	0.73678	0.67405	0.76556	0.35058	0.85269	0.16132	0.5103	-17129	0.86448	-15709	0.096675	10271			0.33949	-0.26571	0.049967	18187	0.52332	-0.15492	0.62302	-0.52335
ARHGEF4	0.0098261	2326	0.83266	0.099671	0.91091	-0.13981	0.86883	0.32564	0.60385	-0.76147	0.58806	0.051088	0.20096	12505	0.58734	0.026122	0.62084	-0.36438	0.70289	-0.14655	0.52609	0.0082417	0.044291	44772	0.36313	0.4724	0.90603	-10934	0.41717	0.82098	0.78892	-15394
ARHGEF40	0.053404	21945	0.68216	0.54347	0.0039329	27279	0.31105	-0.39437	0.67606	0.03653	0.64074	0.87443			0.5811	0.64974	0.93051	-16691	0.10337	38449	0.97121	-0.7743			0.23692	0.24703	0.37795	0.58892	0.08216	0.98494	0.21688	16441
ARHGEF5	0.52655	0.80993	0.76975	-0.50938	0.19732	14353	0.52527	-0.18676			0.10714	0.5264	0.71078	0.2081			0.081191	14981			0.24293	0.010519	0.38464	10317	0.33876	0.87122	0.47566	-22633	0.70225	0.062119	0.069109	16345
ARHGEF6	0.25771	11927	0.074314	0.74045	0.38055	0.58344	0.46933	-0.49159	0.19234	1511	0.085451	0.38695	0.044308	20852	0.084821	16729	0.46132	-0.5034			0.992	-0.91877			0.20002	-0.18213	0.62336	-0.93	0.46955	0.55682	0.74709	-0.91003
ARHGEF7	0.65427	-0.10468	0.71796	0.13388	0.83539	0.47152	0.34279	-0.2353	0.31786	11154	0.15888	11989	0.2313	0.96551	0.25694	0.25905	0.43731	0.18159			0.65458	-1337	0.82753	-18544	0.16051	0.020862	0.85339	-0.79908	0.67111	-10104	0.19267	0.64892
ARHGEF9	0.79967	-0.65399	0.90536	-0.86181	0.18021	14896	0.37333	0.52839	0.95806	-0.70903	0.43037	0.8346	0.3467	1344	0.34625	0.79039	0.080528	14785			0.12057	10497	0.22895	21936	0.95975	-21451	0.34154	-0.58	0.68145	-0.27659	0.80573	-0.82183
ARID1A	0.11295	18044	0.16226	0.7365	0.88947	-0.67961	0.82269	-0.78467	0.48032	-0.21953	0.17797	-0.058036	0.22792	0.92998	0.72868	0.0050852	0.7225	-0.31651	0.84726	-13756	0.20446	-0.38985	0.78143	-0.51628	0.13041	0.2391	0.67135	0.17083	0.24312	14753	0.062362	24046
ARID1B	0.82248	-0.44709	0.29794	0.83882	0.076607	0.31013	0.89117	-0.25477	0.49425	0.97308	0.59995	-0.2104	0.33649	10698	0.17992	0.25417	0.21514	-0.37081	0.2172	24406	0.5603	-12348	0.033469	47061	0.24849	-12696	0.25127	12291	0.024482	22716	0.32047	0.95268
ARID2	0.16133	15939	0.17005	0.83482	0.56667	-0.11914	0.87362	-0.48117	0.73752	0.63148	0.89246	-0.69903	0.46554	0.60604	0.10786	0.70292	0.46551	0.37226			0.37689	0.38947	0.5517	-0.041918	0.62023	-23455	0.94691	-0.47026	0.76786	-0.74221	0.4914	0.7247
ARID3A	0.89658	-0.32184	0.565	0.10372	0.79969	-0.32455	0.69045	0.21128	0.012602	34357	0.55437	-0.051052	0.51004	-0.3485	0.61433	-0.043106	0.29723	-0.67638			0.37127	0.6743	0.033581	35335	0.43662	0.56926	0.81064	-15048	0.4224	-0.008218	0.56478	-0.18146
ARID3B	0.9585	-0.45063	0.28941	0.82912	0.85704	-0.26925	0.9447	-0.17571	0.19038	13916	0.31882	0.90031	0.14748	17751			0.66012	-0.74918	0.41069	17718	0.30841	0.93425	0.32943	13506	0.50408	0.27821	0.55901	-0.7415	0.33042	-0.96923	0.76103	-0.001007
ARID3C	0.24229	11084	0.64729	-0.23095	0.84187	-0.13847	0.85093	0.34291			0.14897	14176	0.72699	-0.61168	0.6074	-0.40734	0.51732	-0.25017					0.94739	-10089	0.586	-0.40874	0.56465	-0.28905	0.96504	-15609	0.16623	12444
ARID4A	0.08527	19037	0.9811	-10018	0.34826	0.68701	0.66711	-0.28845	0.45251	0.47521	0.75589	0.12373	0.9251	-11669	0.70882	0.27395	0.35441	-18432			0.019512	0.30259	0.14526	25277	0.42494	0.29304	0.1024	0.44836	0.87522	-22644	0.052568	31389
ARID4B	0.53758	0.23816	0.14527	0.01702	0.52264	0.068171	0.25346	0.8571	0.90288	-0.50235	0.2451	2022-05-01	0.095636	16384	0.0015037	27333	0.14381	1628			0.37907	0.41334	0.78332	-1536	0.64258	-0.11667	0.43298	0.50254	0.2664	13153
ARID5A	0.92159	-0.050068	0.11981	1108	0.43747	0.41622	0.067525	11451	0.38972	0.87149	0.92815	-0.46439	0.58819	0.13866	0.63481	0.42223	0.77147	-0.41556	0.89203	-18572	0.16556	1479			0.15205	0.66229	0.35437	0.027082	0.8276	-0.85841	0.63184	-0.46572
ARID5B	0.33817	0.98967	0.92128	0.11298	0.89871	-0.14152	0.11365	0.37033	0.13989	0.058006	0.86349	-0.16581	0.074015	0.69523	0.59964	0.186	0.36245	-11715	0.7864	0.31591	0.66198	-0.4856	0.071975	39268	0.87042	-18639	0.25913	11136	0.39622	0.51609	0.42599	0.94485
ARIH1	0.73507	-0.042054	0.30856	0.42594	0.023921	13814	0.81225	-0.53429	0.34754	0.87401	0.6059	0.070505	0.81915	0.59308	0.92916	-0.80493	0.28578	0.32319			0.51407	0.26121	0.52232	-0.43566	0.92904	-26534	0.33516	0.71561	0.62892	-1689	0.85646	-0.74956
ARIH2	0.54344	-0.67558	0.58735	0.55472	0.94567	-0.62293	0.24948	0.46719	0.31167	0.91004	0.98845	-10474	0.77773	-0.75572	0.20616	0.76045	0.3935	0.078798	0.99793	-42889	0.7297	-0.2057			0.35468	0.72359	0.61815	-13834	0.81769	-11482	0.96884	-11436
ARIH2OS	0.13556	16567	0.4457	0.76996	0.95144	-0.64287	0.61282	0.50926	0.68619	0.1053	0.68551	-0.033542	0.67083	-0.16575	0.71217	-0.36685	0.64424	-0.088808	0.0094662	52593	0.74382	-0.55195	0.74516	-12684	0.11643	1862	0.20173	15043	0.20186	0.76556	0.27591	0.81012
ARL1	0.20287	-0.66684	0.72867	0.45275	0.88187	-0.40577	0.90319	-0.67159	0.82837	0.22718	0.72029	-10694	0.3702	-18864	0.7103	-0.37776	0.361	0.15351	0.26974	28005	0.10543	0.92812	0.13117	3062	0.69549	-20016	0.58648	0.0033935	0.3515	-0.5652	0.86854	-19485
ARL10	0.32552	0.85852	0.62213	0.11128			0.9428	-0.4401	0.24171	10116	0.57458	-0.080121	0.71523	0.69476	0.5425	0.19775	0.40167	-0.75626	0.5623	0.79086	0.84513	0.045161	0.41314	0.85631	0.1558	0.77468	0.2695	-0.42741	0.54034	-0.61311	0.3329	10567
ARL11	0.59176	0.036888	0.87719	-0.17197	0.030983	13947	0.38478	0.64393	0.48158	0.97505	0.52361	0.56418	0.45165	0.91836	0.10133	17386	0.11198	16478	0.25059	27589	0.13439	0.1569			0.09631	0.82432	0.099443	19515			0.90267	-12197
ARL13A			0.21243	0.9429	0.37724	0.7761	0.4717	0.18157	0.62223	0.98742	0.30085	0.6077	0.029827	0.30802	0.38009	0.45872	0.055521	0.83184	0.33174	20681	0.21043	0.78945			0.62325	-19829	0.13406	19009	0.25888	12383	0.74519	-0.76405
ARL13B	0.27593	0.68047	0.82417	-0.49543	0.80922	0.1769	0.80358	0.12144	0.47676	0.75268	0.60375	-0.19851	0.074885	16468	0.089448	14839	0.57692	0.37235	0.30214	0.83146	0.16884	14549	0.9457	-29208	0.6467	-0.78513	0.22777	0.69566	0.98935	-28184
ARL14	0.64801	0.72288	0.073417	13641	0.60625	0.16303	0.45944	0.37912	0.33077	12901	0.25656	10711	0.64572	-0.55481	0.036241	0.73801	0.168	15786	0.623	0.72975	0.79271	-0.2226	0.54171	-0.71597	0.13482	-19792	0.81144	-0.2642			0.083966	0.35732
ARL14EP	0.63433	0.76062	0.15279	11918	0.78497	-0.12356	0.24916	0.69358	0.8089	-0.12742	0.55337	0.89121	0.47696	0.76015	0.80391	0.32825	0.37771	0.13114			0.71673	-0.85375	0.19224	25871			0.35029	0.92233	0.34238	-0.098568	0.51517	0.48221
ARL14EPL	0.050966	19445	0.02821	16333	0.19524	13825	0.49561	0.17465	0.79852	-0.57292	0.015983	17692	0.12606	15209			0.15677	0.60501	0.79701	0.83698	0.14294	0.67935	0.42987	0.38639	0.65247	-0.29261	0.045738	14205	0.083831	18934
ARL15	0.24314	0.13761	0.22272	0.046958	0.57743	0.69639	0.13257	0.49139	0.29932	0.80714	0.60701	0.68625	0.20641	2017-01-01	0.35444	0.57232	0.81299	-0.66483			0.83819	-16832	0.71365	-1044	0.90306	-0.36377	0.71664	-28101	0.76768	-0.42078	0.74788	-0.36553
ARL16	0.82588	-0.73556	0.74684	-0.3226	0.15494	0.14065	0.79825	-0.034459	0.7198	-0.56592	0.94738	-0.97435	0.12407	0.99983	0.090725	0.5714	0.099476	-0.66713	0.38241	19403	0.76686	0.12332	0.17755	2808	0.10865	15749	0.072042	-0.39836	0.92591	-18135	0.96082	-17792
ARL2	0.034432	2618	0.84499	0.28087	0.81681	-0.1138	0.6718	-0.43898	0.70017	0.42927	0.034253	10671	0.083423	18671	0.44649	0.57181	0.63134	0.37594			0.21987	11813			0.5759	-0.67825	0.94375	-13807	0.16883	19334	0.2644	17389
ARL2BP	0.7731	-0.045101	0.34135	0.78317	0.13032	16232	0.38665	-0.10809	0.74954	-0.45027	0.7323	0.36757	0.64301	0.63673	0.82222	0.17063	0.89856	-0.27071			0.95042	-28629	0.19612	25232	0.27592	-0.27916	0.57576	0.0040104	0.29692	11771	0.14267	23572
ARL3	0.82092	0.47365	0.20257	0.73228	0.19498	0.38676	0.72797	0.25888	0.62519	0.19459	0.6797	0.43349	0.67905	-0.25728	0.91765	-16155	0.63262	-0.23001	0.54874	0.82783	0.057488	10027	0.72683	0.71335	0.9845	-1844	0.95485	0.034016	0.48506	0.14671	0.12045	18586
ARL4A	0.77476	0.36054	0.41768	-0.66134	0.70936	0.10529	0.12667	13229	0.29028	12973	0.44456	0.14148	0.16498	15981	0.72255	-0.070344	0.66277	-0.28541	0.75828	-0.56714	0.033298	11503	0.13065	32722	0.9589	-23118	0.63932	-0.72517	0.29161	0.011995	0.90467	-2361
ARL4C	0.72344	-0.52022	0.53002	0.078445	0.18391	-0.69034	0.83527	-0.12483	0.4386	-0.19161	0.76298	0.18187	0.64295	-0.027528	0.80022	0.26742	0.17246	0.87027	0.5632	0.74692	0.75868	-0.1031	0.4115	-0.31895	0.58715	0.15206	0.5888	-0.19959	0.43526	-0.83377	0.2238	1503
ARL4D	0.80346	-0.66494	0.45373	0.58755	0.97155	-0.87988	0.70414	-0.30474	0.94887	-14241	0.28461	0.52706			0.82667	-0.49192	0.80032	-0.44032			0.43659	-0.83612	0.77951	-0.5462	0.93643	-0.2631	0.88367	-0.14346	0.17287	12562	0.04379	28672
ARL5A	0.39178	0.42571	0.58689	-0.0089252	0.44462	0.48658	0.15556	0.43143	0.28769	0.64504	0.49785	0.74352	0.70553	0.26458	0.64445	0.51543	0.33007	0.27367	0.74885	-0.43534	0.105	0.050792	0.81151	-0.28155	0.69164	-0.37859	0.96076	-12154	0.72251	-12774	0.32986	11413
ARL5B	0.47374	-0.022618	0.34082	0.8031	0.17522	13364	0.97536	-0.36043	0.74457	-0.01436	0.026239	15812	0.62414	0.077929	0.78995	-0.39797	0.49339	-11091			0.92486	-0.076202	0.7068	-0.44269	0.43792	-0.17223	0.22213	0.47288	0.021838	26058	0.92711	-0.73612
ARL5C	0.82954	0.023033	0.45665	0.64692	0.21624	12858	0.69379	0.45214	0.42573	0.6349			0.68779	-0.07861	0.85929	-0.82396	0.93259	-16136	0.39909	20405	0.68114	-10263			0.51291	0.49517	0.6379	0.42983	0.097615	22756	0.30699	10983
ARL6	0.83037	0.14234	0.42686	0.43266	0.44404	0.60029	0.70106	-0.31004	0.42591	-13542	0.74715	0.16839	0.00687	26477	0.064555	13649	0.76783	-0.67655	0.020707	51034	0.89709	-0.1977	0.33505	-0.13286	0.85855	-16397	0.64927	-0.52955	0.32368	0.11433	0.95795	-29415
ARL6IP1			0.42158	0.6015	0.59552	-0.99985	0.63832	0.24159	0.82153	-0.28368	0.94068	-0.81743	0.83728	0.053258	0.85168	-0.44187	0.032986	16657	0.60902	0.50594	0.41488	-0.78281			0.15032	-0.00050924	0.77389	-0.26852	0.034525	25419	0.79326	0.59655
ARL6IP4	0.38844	-0.16975	0.16815	11122	0.35634	0.8075	0.51542	0.17679	0.58632	0.17261	0.81625	0.64091	0.89664	0.28098	0.23426	11184	0.060568	0.75683	0.59497	0.60913	0.16473	10379	0.76756	-11739	0.33786	-0.35735	0.27973	-0.23231	0.72001	-0.69261	0.18386	1696
ARL6IP5	0.30317	0.046987	0.62706	0.53801	0.373	0.69645	0.31263	-0.22613			0.68349	-0.13157	0.89456	-0.97162	0.85855	-0.34621	0.86294	-0.78482	0.85274	-14433	0.99214	-35343	0.87683	-22647	0.4985	-19044	0.06851	0.712	0.39384	0.59016	0.86603	-10563
ARL6IP6	0.5116	10662	0.037435	0.6764	0.53445	0.93793	0.6016	-0.080414	0.2732	12819	0.046093	13681	0.066914	17671	0.96731	-0.19089	0.90962	-0.64264	0.61557	14699	0.25684	-11053			0.74873	-0.76371	0.082085	0.35072	0.99245	-25941
ARL8A	0.5205	0.27456			0.47309	0.44712	0.6363	-0.182	0.07963	23683			0.58043	0.9954	0.6956	-0.33566	0.22479	0.31302			0.31468	0.91028			0.31182	11586	0.50982	-0.10291	0.6693	0.29848	0.92946	-26188
ARL8B	0.6584	-0.068919	0.94844	-11421	0.54867	0.17142	0.71082	0.52445	0.64488	0.10381	0.4637	0.5403	0.5335	0.31706	0.69035	-0.23769	0.87552	-0.40552	0.37513	0.89684	0.44066	0.67311	0.16225	29529	0.62953	-0.17326	0.39759	-15273	0.066527	21289	0.39209	0.94633
ARL9	0.0665	24016	0.26266	0.88094	0.28822	0.74451	0.54939	0.40609	0.17573	16157	0.60504	0.94993	0.060683	1546	0.4892	0.4739	0.10072	-0.86161	0.56082	0.8312	0.56897	-11129	0.79526	-16167	0.21685	10566	0.78992	0.50345	0.27628	1152	0.82855	-15639
ARMC1	0.37664	0.46615	0.42133	0.46873	0.35454	0.212	0.10141	0.68532	0.3272	11455	0.98224	-0.81706	0.89857	-0.16493	0.8556	-0.1286	0.45119	0.21516	0.23792	27939	0.24681	0.82594	0.16336	28662	0.83319	-0.39346	0.46469	0.61007	0.77005	-15459
ARMC10	0.64095	0.064777	0.96665	-10434	0.090776	13207	0.73751	0.36884	0.203	0.68621	0.81493	0.17002	0.36725	0.091525	0.80836	-0.5495	0.015206	19713	0.85341	-14316	0.34244	0.78697			0.77269	-0.82738	0.20385	14527	0.59511	0.094437	0.034037	21052
ARMC12	0.75471	-0.566	0.33569	0.21572	0.98871	-0.99409	0.55687	0.023081	0.7206	0.7203	0.97717	-0.42961	0.16091	14382	0.48963	0.3955	0.015202	10327			0.42567	0.79465	0.24359	22316	0.4631	-0.11802			0.57034	-0.19673	0.24832	0.78432
ARMC2	0.85215	-0.34206	0.80322	0.33044	0.39229	0.70879	0.22289	0.59648			0.37535	10297	0.79123	0.090016	0.061044	19174	0.073971	17491	0.02128	45117	0.44591	-0.97682	0.20897	23262	0.22762	0.63461	0.3057	0.96879	0.24268	0.8326	0.38049	-0.12461
ARMC3	0.87532	-0.71681	0.37953	0.19964	0.93612	-0.73809	0.35554	0.54656	0.29399	0.25516	0.29011	0.2239	0.43457	0.44818	0.44945	0.8029	0.45355	0.46129	0.22426	19003	0.3525	0.7504	0.7729	-14653	0.80495	-12477	0.38545	0.73251	0.44447	0.26431	0.078934	12852
ARMC4	0.79967	-0.28309	0.45034	-0.4034	0.172	0.33762	0.73437	-0.466	0.57342	0.12548	0.53418	0.76913	0.38961	0.47418	0.42312	0.53807	0.95323	-14894	0.80962	-0.9979	0.09233	11269			0.78023	-17921	0.72061	-12491	0.13854	14217	0.27094	1572
ARMC5	0.77528	0.21558	0.79303	0.088638	0.17477	13398	0.36008	-0.18583	0.73358	0.1987	0.48328	0.85384	0.24726	13381	0.62217	-0.27621	0.39395	0.20479	0.06721	41237	0.053725	0.55707	0.95292	-24054	0.038525	19267	0.56884	-0.31083	0.78646	-13593	0.49338	0.21929
ARMC6	0.1722	17031	0.70467	0.49542	0.32365	0.89213	0.47391	0.28266	0.15622	17361	0.14449	15184	0.28347	-0.24961	0.3356	0.2146	0.29838	0.5487			0.33948	0.31482	0.10142	1215	0.29233	0.020455	0.60607	-0.26217	0.37334	0.91514	0.85465	-20044
ARMC7	0.39097	0.62686	0.15961	0.68399	0.67863	-0.15086	0.72007	-0.18265	0.61151	-0.17176	0.68737	-0.18318	0.46699	0.19665	0.6979	0.062959	0.59516	0.32411	0.50447	14491	0.61464	-0.38368	0.034597	46343	0.26392	0.13437	0.23956	-18436	0.44455	0.17136
ARMC8	0.23319	10501	0.67591	0.55634			0.11366	-0.31259	0.0083954	38453	0.22824	11795	0.090921	17014	0.1898	12789	0.47623	-0.73423	0.47296	1442	0.95649	-12498	0.026856	47726	0.63982	-0.93557	0.12887	16608	0.023698	14198	0.21509	14945
ARMC9	0.4599	0.24939	0.061417	13882	0.64614	0.54885	0.051895	11355	0.87395	0.36282	0.93809	-0.27744	0.24528	14849	0.14038	1223	0.93707	-0.59194	0.54561	0.90883	0.33978	-0.11069	0.083014	38042	0.98428	-23766	0.31118	0.90252	0.53106	0.3849	0.71065	-10109
ARMCX1	0.35411	0.80763	0.89842	-0.70632	0.39098	0.33276	0.76683	0.35578	0.90078	-0.64074	0.017327	20282	0.019197	31256	0.0042166	32738	0.81903	-15067	0.41115	17452	0.7722	-18737	0.63431	-0.53569	0.80412	-14216	0.43418	0.62797	0.42252	0.75458	0.15309	0.35775
ARMCX2	0.50656	-0.039408	0.4497	0.78369	0.75453	-0.42827	0.14733	11875	0.36915	0.99837			0.19687	14623	0.59674	0.74728	0.8381	-0.61555			0.89459	-11205			0.87571	-11654	0.95952	-10329	0.024101	34173	0.69428	-0.92508
ARMCX3			0.86654	-0.58178	0.27319	-0.037475	0.66857	-0.2422	0.28465	-10395	0.93221	-0.063095	0.94464	0.28166	0.32232	-0.60122	0.18391	0.82677			0.95207	-0.5639	0.71036	-0.31776	0.91977	-0.33012	0.58852	0.083821	0.48233	0.082981	0.24655	16348
ARMCX4	0.17646	0.80149	0.27263	-0.4886	0.72203	0.30033	0.98275	-14059	0.018218	31347	0.76749	-0.15962	0.13654	17202	0.55367	0.61164	0.37404	0.46736	0.31347	25728	0.52985	-0.044618	0.55482	0.37392	0.70851	-11331	0.67978	-0.57686	0.62025	-1405	0.8998	-23548
ARMCX5	0.4216	0.56761	0.28011	-0.22961	0.4764	0.9161	0.74407	-0.30737	0.90468	-11249	0.059669	13591	0.22398	12495	0.23692	0.92836	0.54524	0.31855	0.14567	3389	0.21952	0.7783	0.71837	-0.21317	0.13489	-0.84132	0.70581	-0.88255	0.34194	-0.33618	0.46356	0.90697
ARMCX6	0.81214	-0.091884	0.43742	0.35606	0.10118	12729	0.2365	0.63578	0.36043	0.31554	0.89633	-0.60751	0.48266	0.32105	0.52908	-0.0066341	0.51862	0.23582	0.73927	-0.41497	0.1674	13014			0.86206	-20893	0.40449	0.66505	0.04732	29334	0.11779	0.82317
ARMS2	0.67811	-0.29199	0.67405	-0.59997	0.16439	11229	0.32261	0.28375	0.49229	0.4732	0.75876	0.33446	0.032987	24635	0.041455	1189	0.081028	0.86026			0.018154	26236	0.96922	-32566	0.6115	-0.48421	0.10972	16516	0.19813	0.63928	0.70585	-0.016756
ARNT	0.71637	-0.91066	0.29385	-0.034541	0.25751	0.46745	0.83603	-0.3206	0.90213	0.31459	0.25951	0.78753	0.87847	-0.075652	0.99009	-10376	0.97223	-11872	0.24041	26226	0.95359	-0.6595	0.64804	-14131	0.726	-10757	0.94048	-11611	0.49669	-0.35198	0.22363	0.89046
ARNT2	0.85453	-0.17205	0.092304	0.82169	0.52545	0.085013	0.85477	-0.99477	0.70078	-11265	0.60982	-0.10463	0.71486	-0.53598	0.50883	0.2281	0.94776	-0.64888	0.7273	0.85082	0.11524	10661			0.6236	-0.19238	0.55256	-0.33405	0.46749	-0.75497	0.45938	0.46024
ARNTL	0.54768	0.054046	0.74701	-0.57572	0.65374	0.50753	0.66901	-0.57683	0.98371	-0.66509	0.74512	-0.018091	0.47879	0.59129	0.66458	0.20647	0.83726	-0.36586	0.60876	0.46166	0.62662	-12221	0.18239	2319	0.97523	-0.4213	0.68968	0.38431	0.70775	-0.20561	0.96365	-16547
ARNTL2	0.73884	-0.47202	0.92618	-0.39321	0.77647	-0.21384	0.63568	-0.33855	0.059577	0.9109	0.13896	10694	0.89789	0.30622	0.62022	-0.14878	0.25239	0.59453	0.7202	-0.2282	0.9562	-1277	0.97168	-32718	0.83096	-0.49606	0.41485	0.70878	0.97756	-3.25	0.90127	-0.92021
ARPC1A	0.78056	-0.090667	0.4025	0.60922			0.94369	-0.067211	0.003696	39276	0.87467	0.17039			0.64317	0.25963	0.16786	0.76051	0.13851	29409	0.73185	-19885	0.18843	26473	0.92839	-14043	0.68039	-18309	0.019069	18986	0.68316	-0.49162
ARPC1B	0.39545	-0.61597	0.76369	-0.61699	0.72811	0.81464	0.74862	0.2279	0.54037	0.3519	0.90425	-10141	0.87279	-0.80028	0.47178	0.41721	0.2795	0.87685	0.67787	0.019384	0.1392	0.40473			0.58418	0.35877	0.26141	0.73162	0.17063	0.69512	0.21793	1517
ARPC2	0.58581	0.39504	0.724	-0.25871	0.78963	-0.31359	0.50607	-0.26779	0.048062	18721	0.99118	-0.7202	0.20904	13436	0.91952	0.089699	0.21438	0.80195	0.98239	-32982	0.85445	-15155			0.70422	-1144	0.56833	-0.69723	0.34686	-0.19242	0.55984	0.0020845
ARPC3	0.79518	0.60404	0.90414	-0.26648	0.46809	0.39989	0.28656	0.84973	0.11383	0.95314	0.56152	0.18695			0.84175	0.29869	0.85215	0.24692	0.66207	0.13993	0.20928	10993	0.63519	-0.54714	0.27719	12075	0.42619	-0.030697	0.97635	-29549	0.074382	27339
ARPC4	0.60261	0.0036421	0.93505	-0.37112	0.29246	0.49036	0.97499	-0.78346	0.90164	-0.49582	0.85074	-0.37298	0.26041	0.27113	0.39765	0.44614	0.092055	11174			0.75444	-29973	0.77642	-0.65649	0.77432	-1073	0.94827	-0.89176	0.44754	-10982	0.98184	-12568
ARPC5	0.76334	0.1789	0.43339	0.37329	0.17234	16072	0.97552	-0.55243	0.59628	0.23342	0.45455	-0.79426	0.976	-0.93456	0.40976	0.39064	0.20873	11657	0.59877	0.86197	0.90991	-15171			0.5622	-0.78291	0.80593	-16258	0.73834	-0.070545	0.94099	-26922
ARPC5L	0.91306	0.11833	0.84872	0.25265	0.99832	-0.79162	0.52924	0.51392	0.78591	-0.22266	0.82174	-0.42297	0.43425	0.72164	0.31983	0.89435	0.31586	-12637	0.89345	-0.37561	0.98268	-0.989	0.32845	0.39998	0.62943	-2121	0.36631	-0.53901	0.14881	16952	0.95295	-19779
ARPP19	0.35136	0.36756	0.75085	0.52257	0.52422	0.26495	0.45029	0.65709			0.42568	10189	0.085044	16179	0.41749	0.78548	0.026164	22546			0.070893	23224			0.010974	14579	0.64554	-0.74634	0.55464	-0.30569	0.096431	27497
ARPP21			0.68672	-0.04371	0.50013	0.70206	0.42234	-0.87251	0.82394	-0.23984	0.32487	10756	0.87516	-0.00037406	0.85885	0.4157	0.1483	-0.35116	0.64152	0.28651	0.89186	-17527	0.51034	-17561	0.17905	-12299	0.71216	-0.31923	0.80156	-0.33018	0.53516	0.60972
ARR3	0.90246	-0.1943	0.85966	0.38291	0.10107	15716	0.42839	0.14478	0.31326	10956	0.61879	0.90084	0.85106	-0.29578	0.20603	13172	0.2317	0.13095	0.34521	21233	0.38823	0.70345	0.13579	14595	0.12034	0.8643	0.64002	0.27782	0.1278	-0.0023297	0.90495	-14348
ARRB1	0.59674	-0.16585	0.47781	0.36563	0.74513	0.55919	0.69881	-0.16718			0.542	0.90035	0.34656	1084	0.89226	-0.29916	0.15479	-0.20918	0.33183	22241	0.96642	-17596	0.16142	2846	0.51002	0.53521	0.55443	-0.27746	0.051647	24857	0.3176	0.96386
ARRB2	0.55676	0.16577	0.24724	-0.63607	0.46293	0.45691	0.47035	-0.058567	0.19402	16551	0.39088	-0.27277	0.96294	0.022487	0.33166	0.93654	0.9745	-1351	0.085824	35407	0.42747	0.018881	0.11346	34289	0.64209	0.42109	0.55985	0.2894	0.9121	-11489	0.25918	15398
ARRDC1	0.060142	0.24023	0.34578	-0.55829	0.15606	16065	0.75372	0.44867	0.74994	-0.46936	0.81916	-0.38759	0.57123	0.49719	0.80689	-10409	0.63739	0.25893	0.49121	0.74864	0.81756	-0.95732	0.012685	52071	0.19468	13921	0.44086	0.59546	0.98345	-14909	0.35712	0.9334
ARRDC2	0.16869	14784	0.41444	0.060496	0.11966	12654	0.55508	0.20106	0.5961	0.17535	0.86181	-0.32255	0.12078	1568	0.51753	0.30431	0.77567	-0.47582	0.98708	-34356	0.13788	1271	0.87978	0.043482	0.65672	-0.10682	0.6046	-0.21423	0.97076	-20118	0.90136	-15336
ARRDC3	0.012943	20912	0.89632	-0.66677	0.40125	0.04675	0.9851	-0.81616	0.25067	12807	0.69437	-0.37518	0.23432	13687	0.27984	0.94535	0.1171	16587	0.55045	13628	0.33658	-0.02102			0.71897	0.432	0.44844	0.12745	0.024368	23942	0.61612	-26827
ARRDC4	0.34397	0.37344	0.60645	0.16652	0.3135	10971	0.41676	0.60415	0.57978	-0.056794	0.729	-0.57865	0.70578	0.91498	0.69218	-0.047252	0.059938	15172	0.56759	-0.26614	0.24743	0.74763	0.53258	-0.73262	0.96187	-0.78692	0.46197	0.57253	0.41892	-0.028005	0.72303	-10941
ARRDC5	0.82181	0.076568	0.73897	-0.53038	0.42175	0.99849	0.60526	0.49717	0.50133	0.42292	0.77134	0.23359	0.19379	13358	0.0039809	3139	0.33256	-1478	0.34552	21958	0.70483	0.16522	0.85227	-0.69918	0.88772	-21493	0.49117	-0.78565	0.43893	0.75779	0.23386	12662
ARSA	0.99507	-11755	0.58823	-0.29735	0.72891	0.31982	0.10508	0.56804	0.68941	0.33198	0.81228	0.30755			0.69668	-0.006986	0.58682	-0.16703	0.38527	19247	0.89982	-0.90922			0.76997	0.32419	0.20335	0.61051	0.77069	-0.21097	0.1948	0.61023
ARSB	0.38332	0.79525	0.45663	0.59771	0.6035	-0.17401	0.33277	0.75594	0.48773	0.8853	0.26471	11649	0.12223	15676	0.7329	0.32993	0.58488	-0.052013	0.91241	-21098	0.94336	-0.71089			0.3358	0.77257	0.96345	-0.55131	0.55656	-11951	0.11151	17929
ARSD	0.47576	0.58853	0.83032	0.31286	0.97862	-0.41331	0.44701	-0.90696	0.096356	18999	0.94581	-0.95112	0.41398	0.067555	0.13016	11616	0.45558	-0.13123	0.023695	48787	0.024022	21764	0.29444	16783	0.11072	11432	0.69739	-0.49616	0.43627	-0.7829	0.41642	10403
ARSE	0.65864	0.4777	0.46191	-0.71029	0.27906	0.81657	0.52735	0.61698	0.94346	-0.62148	0.56926	0.59166	0.66783	-0.44122	0.25694	0.17297	0.92289	-0.72357	0.98212	-32851	0.97795	-16119	0.84264	0.11186	0.29645	10156	0.77109	0.0053868	0.42418	-25767	0.86339	-0.53212
ARSF	0.82847	-10981	0.17843	0.80996	0.94534	-0.64977	0.89774	0.073233	0.55488	-0.14712	0.97969	-0.85515	0.23073	0.87428	0.99637	-0.4247	0.19581	0.16661			0.18515	0.49938	0.16905	19052	0.24659	0.35545	0.66628	-0.50951	0.77264	-0.76415
ARSG	0.1823	0.47967	0.741	-10505	0.44355	0.2585	0.92408	-0.21091	0.91535	-0.4525	0.10308	17418	0.58224	0.20285	0.49456	0.26857	0.84379	0.063764	0.0056178	46444	0.50905	-0.53668			0.2994	0.59803	0.8341	-0.24586	0.45602	-0.63454	0.11913	0.98888
ARSH	0.82057	-0.069553	0.82286	0.23077	0.24341	0.301	0.53404	0.063962	0.6762	0.10335	0.97422	-10246	0.46836	0.42497	0.74947	0.228	0.43679	0.1679	0.51469	0.83004	0.091006	0.27892	0.87768	-0.78556	0.0014589	25839	0.71322	0.26343	0.94938	-29124	0.78203	-14606
ARSI	0.66311	0.62978	0.28551	-0.36871	0.40554	0.83664	0.491	0.69482	0.56788	0.5991	0.49451	0.30615	0.87123	-0.047979	0.24731	0.92034	0.61749	0.22824	0.43608	16713	0.52517	-10052	0.43518	0.74017	0.39819	0.71891	0.51796	-0.019409	0.057169	28167	0.50233	0.71676
ARSJ	0.12354	16128	0.020398	12333	0.36977	0.63635	0.87584	-0.030569	0.33455	10897	0.21715	0.97814	0.30941	12228	0.34471	0.75102	0.83603	-0.032794	0.31626	23258	0.63183	-0.29945	0.33067	1459	0.82024	-0.76211	0.30598	-0.30316	0.56868	-0.7131
ARSK	0.60096	0.17804	0.64057	0.17509	0.61639	0.012495	0.84473	-0.6647	0.53477	0.66787	0.40054	0.57913	0.63062	-0.033193	0.83629	0.35098	0.75387	0.15143	0.17881	32655	0.82897	-0.23484	0.5645	-0.11755	0.97651	-13615	0.40638	0.70659	0.10505	16975	0.98494	-13524
ART1	0.96356	-10218	0.6661	0.050059	0.30064	0.20519	0.61872	-0.65704	0.56136	0.29991	0.91501	0.046466	0.90769	-0.6783	0.73214	-0.63546	0.87016	-0.6623	0.49672	-0.15666	0.9836	-19681	0.77081	-16837	0.77874	-0.97953	0.87214	0.31003	0.66182	-0.42971	0.91893	0.021731
ART3	0.51522	0.82493	0.76915	0.43598	0.84258	0.23758	0.41748	0.32971			0.31163	0.96973	0.18216	16654	0.38606	0.72385	0.57506	-0.46747	0.89254	-10073	0.96731	-11899	0.53003	-0.40956	0.55078	-0.76757	0.51618	-0.16398	0.48586	-0.066473	0.71035	0.035108
ART4	0.21335	10117	0.43225	0.65254	0.14137	14638	0.89735	-0.086595	0.10409	-0.17983	0.45666	0.57393	0.87262	-0.20914	0.39092	0.81662	0.93502	-14865	0.20152	29321	0.34043	-27618	0.66803	-0.44635	0.81225	-18227	0.042154	15027	0.83149	-0.76906	0.79403	-0.30916
ART5	0.76525	0.3211	0.62492	0.43614	0.54311	0.20038	0.91745	-11755	0.51463	0.0028216	0.88185	0.20296	0.50559	-0.083039	0.46744	-0.70859	0.38394	0.21968	0.64255	0.14659	0.54334	-17796	0.44549	0.11462	0.38741	-0.78478	0.73714	-0.88529	0.22025	0.77818	0.41272	0.64741
ARTN	0.23379	14026	0.83204	-0.49003			0.62259	-0.11869	0.33609	0.89598	0.77723	0.30938	0.92397	-0.42445	0.81109	-0.6299	0.045335	0.5078	0.28935	2559	0.26468	1059	0.38353	10517	0.10306	10666	0.6647	0.2285	0.23323	10678	0.3399	-0.24
ARV1	0.30599	0.98968	0.085202	0.95319	0.92993	-0.015189	0.26727	0.68958	0.17579	14528	0.45089	0.31398	0.53667	0.33969	0.086157	1541	0.47609	-0.41977	0.65446	0.10975	0.6341	0.34086	0.012697	4471	0.85269	-0.1888	0.41299	0.67688	0.78155	-0.4428	0.53598	-0.9492
ARVCF	0.35332	10203	0.70932	-0.36767	0.20749	10872	0.00015905	19669	0.34442	0.53793	0.72417	0.48598	0.8148	0.18249	0.31561	0.57416	0.7039	-17906	0.76066	-0.59522	0.35119	0.37702	0.75182	-13107	0.27815	10214	0.14816	-1.29	0.74367	-10332	0.61332	0.24735
ARX	0.50414	0.3016	0.94434	-0.29438	0.96634	-10177	0.97606	-0.29267	0.8642	-0.82966	0.59398	0.43328	0.22835	0.87269	0.97706	-16538	0.93639	-0.56687			0.54118	-0.11176	0.38592	10184	0.92046	-1.01	0.18515	0.69287	0.20271	16573	0.43073	0.81113
AS3MT	0.56255	-0.23801	0.75661	-0.16165			0.67344	0.10437	0.017417	19477	0.9711	-14978	0.7862	-0.50268	0.58859	0.27758	0.63086	-11032	0.74283	-0.20208	0.21709	0.71767	0.30638	15362	0.7089	-0.10453	0.3681	0.18821	0.9877	-1848	0.2855	11318
ASAH1	0.019222	25809	0.025689	14558	0.45059	0.74802	0.090601	0.99095	0.84639	0.50554	0.39398	0.9056	0.58852	1016	0.46496	0.70626	0.15831	1506			0.14384	-12769	0.83519	-13296	0.48735	-0.57043	0.079076	14348	0.94537	-19255	0.054874	14483
ASAH2	0.42454	10568	0.74515	0.36575	0.333	0.15172	0.44784	0.28017	0.067719	21699	0.19299	13539			0.50681	0.39822	0.22192	10393			0.5991	-0.77597	0.36049	0.79953	0.9033	-13453	0.73992	-0.70831	0.66635	-0.02309	0.36258	0.99715
ASAH2B	0.24063	12437	0.77563	0.34841	0.25447	1292	0.98185	-0.98007	0.77573	-0.23596	0.11569	14308	0.84651	0.41995	0.27109	0.074727	0.0041576	25577			0.27186	0.98033	0.67761	-0.80812	0.16795	16405	0.36167	0.9606	0.52039	-14323
ASAP1	0.64859	-0.91387	0.60308	0.040959	0.47522	-18428	0.6177	-0.6574	0.37577	0.14418	0.23608	0.12222	0.84011	0.18974	0.98281	-0.81965	0.72715	0.051204	0.61389	-0.0057642	0.38733	0.32383	0.64953	0.08113	0.87009	-0.044103	0.89047	-0.15747	0.74546	-0.35471	0.73598	0.030488
ASAP2	0.26703	0.017089	0.81868	-0.22938	0.36466	-0.61329	0.92318	-0.75488	0.44166	0.16658	0.65568	-0.10447	0.78346	-15053	0.92285	-0.54214	0.33029	-0.078158	0.37476	11122	0.67938	0.07905	0.71735	-1136	0.98547	-15227	0.73252	-0.62982	0.75919	-19621	0.88402	-0.75589
ASAP3	0.031599	20386	0.41197	0.6764	0.83791	-0.024135	0.38191	0.75313	0.30889	11764	0.46936	0.76202	0.50709	0.97131	0.91968	-0.0020619	0.21616	11325	0.61395	0.47356	0.89893	-0.338	0.88067	-1044	0.0089024	25237	0.10881	10233	0.88266	-0.61297	0.069442	29263
ASB1	0.15358	0.089425	0.26275	0.62457	0.85389	-15027	0.78082	0.23171	0.98266	-0.80941	0.93394	-0.31587	0.11392	12206	0.58836	-0.32492	0.66827	-1374	0.19174	30745	0.80722	-0.60097	0.21283	23165	0.060093	16248	0.30543	0.59521	0.31846	1024	0.94211	-11526
ASB10	0.97012	-0.43778	0.26077	0.24481	0.94409	-12339	0.46461	0.17367			0.42974	-0.080195	0.13038	17066	0.33004	0.72879	0.98583	-23729	0.88282	-17415	0.24949	-0.62511	0.70996	-0.7601	0.94605	-10457	0.2938	0.80439	0.72375	-12442	0.24334	12827
ASB11	0.30907	0.92551	0.63969	0.35067	0.84587	-0.53913	0.40021	0.44359			0.88549	-0.39992	0.29082	11619	0.32962	0.12356	0.60379	-0.083178			0.70023	-0.63339	0.97037	-18312	0.29657	0.81587	0.0040144	19596	0.08692	10054	0.98919	-3022
ASB12	0.15485	0.10894	0.38526	-0.21616	0.99852	-0.85111	0.58349	0.23337	0.67156	0.1795	0.26155	-0.77472	0.97651	-0.61008	0.14964	0.46085	0.77705	-12391	0.61689	-0.11511	0.55162	-0.74657			0.57023	-24499	0.77914	-0.53397	0.92438	-11451	0.61091	-0.85812
ASB13	0.45266	-0.21626	0.27697	0.78171	0.19028	13522	0.34529	0.10713	0.86681	-0.2795	0.26463	0.70532	0.94043	-12066	0.88821	0.20206	0.59468	-0.59411			0.17703	15273	0.61034	-0.40425	0.44209	0.51355	0.16159	15542	0.3816	-0.33692	0.58442	-0.30549
ASB14	0.54009	0.71156	0.92243	-0.35375	0.29151	0.93862	0.78172	0.11267	0.80474	-0.42271	0.56753	0.47754	0.14805	16245	0.2238	0.62373	0.057627	17443	0.42506	21869	0.62626	0.33789	0.57752	-0.17061	0.22452	0.39277	0.11092	18614	0.72192	-12714
ASB15	0.023445	0.0094261	0.247	0.63092	0.76318	-0.19778	0.29272	-0.046845	0.45205	0.68693	0.77871	-0.27735	0.78823	-0.67635	0.5656	0.49902	0.0034125	17218	0.7065	-0.20434	0.081651	12136	0.71162	0.13168	0.83263	0.076173	0.18655	0.48624	0.00079789	32015	0.0007412	26145
ASB16	0.15417	0.97638	0.78578	-0.040597	0.71087	0.14854	0.56941	-0.18735	0.8397	-0.79209	0.98429	-10143	0.98184	-0.9899	0.8872	-0.81161	0.79975	-0.83672			0.27464	-0.13835	0.85827	-0.78984	0.46961	-0.30999	0.88296	-11747	0.47933	-0.38052	0.28831	10464
ASB17	0.39166	0.39185	0.38808	0.10412	0.70955	0.32946	0.68543	0.52867	0.77262	-0.041878	0.042335	15915	0.011009	22212	0.20596	12048	0.65062	0.11014	0.0096116	46201	0.13953	-0.20132	0.33035	14116	0.81637	-15028	0.2502	11706	0.7946	0.029759	0.1519	17022
ASB18	0.68605	0.16741	0.40339	0.20639	0.92359	-10858	0.8948	-0.32554	0.48891	11064	0.11003	18694	0.94166	-0.61626	0.26727	-0.27013	0.96194	-10064	0.75077	0.8484	0.37724	0.75041	0.1143	25574	0.14531	14508			0.80672	-19036	0.54407	-0.075372
ASB2	0.093809	16752	0.74805	0.15926	0.75792	-0.62202	0.31287	0.64687	0.72051	-0.80834	0.20449	0.84617	0.65516	10414	0.66748	0.29884	0.78286	-0.37917	0.87708	-15446	0.58676	0.22975			0.58194	0.45609	0.609	0.078185	0.92533	-0.96991	0.48384	-14054
ASB4	0.86772	-0.63036	0.56751	0.34842	0.98508	-0.61463	0.99333	-11458	0.99185	-1003	0.51811	0.38878	0.59662	-12419	0.93228	-0.97215	0.70143	-0.18471	0.80868	-0.68233	0.12766	11435	0.84609	-16524	0.51235	-0.8292	0.69826	-0.14391	0.63331	0.37684	0.32408	11863
ASB5	0.81351	0.26355	0.16986	0.34025	0.61838	-13331	0.62632	-0.083854	0.015474	20088	0.97399	-0.27603	0.29752	-11349	0.56088	-0.48729	0.60503	-0.10443	0.93652	-16104	0.23892	0.9426	0.50789	10824	0.89452	-0.56	0.43909	-0.73804	0.75706	-0.58324	0.95141	-18012
ASB6	0.98615	-0.4115	0.9455	-0.68756	0.95429	-0.59309	0.36576	0.18673	0.30505	-13851	0.51002	-0.072619	0.14384	0.7055	0.27834	0.24621	0.91104	-0.78931	0.55499	0.17875	0.82479	-1515			0.70432	0.076923	0.87016	-0.62624	0.10842	0.43425	0.8678	-11855
ASB7	0.84831	-0.78811	0.097081	1005	0.104	20002	0.22998	0.79284	0.65292	-0.94229	0.3636	0.80718	0.54851	0.44739	0.78063	0.53199	0.49186	-0.99333	0.91676	-21484	0.07806	20975	0.59651	-11546	0.93202	-0.84318	0.12738	17336	0.13149	15041	0.27849	0.12403
ASB8	0.030788	17946	0.60013	0.10393	0.80151	-0.86881	0.63813	-0.19709	0.43376	-0.47273	0.60622	0.29002	0.18486	1134	0.80884	0.19205	0.23252	0.5725	0.92192	-0.90346	0.94373	-14561	0.7352	-0.10293	0.95045	-0.32648	0.39971	0.67969	0.86254	-0.85695	0.95707	-15984
ASB9	0.57524	-0.36944	0.11573	0.66486	0.68089	-10389	0.11861	0.79302	0.36898	0.40324	0.83149	0.15628	0.52709	-0.30774	0.97601	-14894	0.97166	-0.62278	0.58626	-0.85865	0.7376	0.27773	0.99629	-31124	0.95916	-13525	0.28943	0.99744	0.47898	0.5732	0.75165	-1104
ASCC1	0.66063	-0.054014	0.52757	0.49977	0.04362	13354	0.5145	0.47234	0.59012	0.015296	0.52764	0.95935	0.054993	0.88624	0.075232	12984	0.4013	0.67829			0.7372	-0.31255	0.38257	10618	0.30429	0.87907	0.34358	-0.57845	0.44906	0.30728	0.25384	10311
ASCC2	0.98312	-0.96164	0.87785	-0.13221	0.8754	-0.15126	0.021463	12796	0.85693	-0.11218	0.060271	15955	0.22366	1384	0.079185	15926	0.1888	0.17482	0.079749	41333	0.61855	-0.52993			0.091114	0.71759	0.017209	0.66155	0.058448	10733	0.0045321	34234
ASCC3	0.85396	-0.42466	0.28499	0.21318	0.23875	13028	0.267	0.29305	0.95565	-0.13794	0.51072	0.26629	0.49205	0.03785	0.89298	0.47536	0.060384	-0.76458	0.88211	-0.0052296	0.7019	-0.32536			0.011094	34431	0.48408	0.45288	0.33877	10431	0.0076413	44036
ASCL1			0.40802	-10012	0.46943	0.54712	0.5112	0.59113	0.43247	10507	0.046123	18097	0.58662	0.026564	0.66002	0.18936	0.78743	0.2625	0.56566	1273	0.10385	15855	0.6859	-0.86707	0.45758	0.11005	0.22786	0.85632	0.84033	-0.78297	0.50906	0.11449
ASCL2	0.5383	0.76211	0.71696	-0.35142			0.81368	-0.33076	0.058245	13616			0.54946	0.4124	0.8084	-0.1233	0.55589	-0.34898	0.26042	27985					0.39617	0.7061	0.33147	-0.87107	0.0091347	29871	0.5533	-0.29164
ASCL3	0.65425	0.011965	0.34791	0.8652	0.60252	0.80035	0.7602	0.23869	0.64191	-0.13083	0.73497	0.046334	0.32333	0.64717	0.090325	11861	0.3988	0.0059827	0.84679	-13787	0.5191	-0.83158			0.56341	-19618	0.32313	-0.77341	0.34291	0.35817	0.31037	12694
ASCL4	0.88809	-0.19452	0.10797	10829	0.78204	0.22528	0.40514	0.39458	0.31447	10767	0.0057507	24836	0.3907	11539	0.28062	0.92101	0.089176	-0.50801	0.49592	12402	0.065572	0.29693	0.26653	18784	0.858	-0.97605	0.20291	13131	0.50898	0.73079	0.48882	0.4796
ASCL5	0.041144	20955	0.85996	-0.4602	0.42895	0.59519	0.59967	0.66913	0.31579	10521	0.71845	0.99165	0.1478	18927	0.16427	14662	0.47064	-0.3646	0.32191	23562	0.11337	16039	0.55656	-0.046401	0.15135	1353	0.048561	11413	0.091106	17404	0.11161	-0.26002
ASF1A	0.71033	0.28709	0.22688	0.028595	0.096997	16567	0.20857	0.47263	0.67844	-0.40151	0.1594	13953	0.23887	13434	0.22325	11304	0.97319	-11436	0.26888	2565	0.94027	-0.84416	0.41031	16658	0.5416	-0.18055	0.24962	-0.17935	0.47412	0.35317	0.70419	-19589
ASF1B	0.4288	0.99059	0.50103	-0.27755	0.32628	10065	0.97342	-0.43486	0.13388	13655	0.30416	10801	0.64537	0.55743	0.64419	0.22683	0.13748	-0.64612			0.64153	-10769			0.40087	-0.31853	0.053868	0.82312	0.62414	-0.42094	0.34868	0.98007
ASGR1	0.65715	0.75164	0.89435	-0.52082	0.36663	0.02386	0.89177	-0.87627	0.015807	24184	0.27732	10972	0.63788	0.81551	0.60446	-0.34442	0.86902	-13155			0.31667	0.63981	0.8125	-17441	0.44575	-0.16296	0.78445	0.15975	0.044573	20666	0.78715	-14998
ASGR2	0.2449	0.68363	0.30286	-0.032838	0.95294	-0.46393	0.51277	0.64737	0.53882	-0.17185	0.99626	-0.77513	0.21975	0.70723	0.51741	0.57766	0.60634	-1105	0.044789	44438	0.057838	10385	0.58739	-0.10577	0.98932	-24533	0.010996	24921	0.32431	0.92406	0.035652	27147
ASH1L	0.56893	0.11804	0.28457	0.89492	0.62986	-0.054871	0.93974	-0.32896			0.3265	0.89544	0.6339	0.15875	0.62639	0.021685	0.39298	-0.96541			0.35895	0.35932			0.82276	0.066301	0.53951	-17055	0.068029	0.15391	0.67792	-0.76745
ASH2L	0.19829	1553	0.12298	11672	0.56766	0.14673	0.77362	0.13104	0.26217	13087	0.22028	12941	0.76741	-0.45188	0.3099	0.19501	0.74238	-2207	0.79497	-0.8594	0.6335	0.16951			0.033326	15367	0.14902	10832	0.41677	-0.63697
ASIC1	0.59737	0.36939	0.44773	0.49522	0.35749	0.90759	0.64007	0.037061	0.26952	0.87681	0.4711	0.4482	0.53303	0.6592	0.43797	10266	0.71233	-21128			0.40584	0.88139	0.71414	-10557	0.66309	-12139	0.30024	0.72248	0.9447	-20161	0.83707	-15623
ASIC2	0.52651	0.79542	0.24292	0.79331	0.7725	0.32313	0.98937	-0.49598	0.59884	0.71411	0.43782	0.55084	0.45015	0.64802	0.28653	-0.98139	0.90971	-20632	0.57117	0.87738	0.67109	-0.19387	0.4422	0.65447	0.96885	-1.49	0.39023	0.49624	0.91312	-13465	0.39096	0.16695
ASIC3	0.48408	0.12799	0.12138	-0.13928	0.75179	-0.17113	0.99618	-0.74507			0.2651	-0.52337			0.28378	0.83191	0.54866	-22373	0.55043	0.87717	0.78691	-0.63363	0.12376	16189	0.4978	0.21563	0.86629	0.35926	0.54579	-0.67785	0.37632	0.82618
ASIC4	0.67213	-0.073381	0.21907	0.10743	0.33804	0.93684	0.6243	0.3091	0.36252	1036	0.50939	0.54073	0.41391	10181	0.32569	0.54738	0.58254	-0.70899	0.31385	22923	0.92179	-19373	0.61571	0.5063	0.98456	-19563	0.67925	-0.92667	0.42963	0.62996	0.35398	10227
ASIC5	0.62707	-0.14017	0.9743	-0.31197	0.77706	0.17047	0.81807	-0.047955	0.29036	-0.34514	0.92384	0.10819	0.10627	14551	0.92239	-10654	0.80321	-0.72899			0.84884	-0.79563	0.50536	11235	0.73781	-0.89265	0.77239	-20649	0.72862	-0.73164	0.30931	0.68049
ASIP	0.54127	0.28094	0.89814	-0.52919	0.90367	-0.64467	0.94896	-0.55757	0.65804	-0.21558	0.64378	0.50987	0.27547	0.95536	0.86909	0.0122	0.67421	0.43586			0.21075	13559	0.245	2141	0.28474	0.083384			0.10722	-0.052557	0.1455	22073
ASL	0.58944	-0.70601	0.61271	-0.99558	0.97399	-15163	0.76904	-0.48428	0.46378	-0.50789	0.87389	-0.85826	0.65547	-0.19667	0.76503	0.13213	0.14339	0.79725	0.61472	0.42073	0.76117	-11427	0.91505	-12017	0.53712	0.49902	0.56931	-28842	0.267	10548	0.028372	24908
ASMT	0.74176	0.49388	0.77079	-0.023551	0.10484	1224	0.20265	0.81465	0.025099	19141	0.69603	0.084858	0.38906	0.55628	0.84524	-0.087146	0.40902	0.52152			0.010429	-0.51019	0.21729	22529	0.30158	0.67115	0.57099	-11836	0.94509	-15943	0.73102	0.014435
ASMTL	0.81263	-0.086312	0.2889	-0.087415	0.45748	0.88446	0.72531	0.086815	0.7345	-0.39075	0.50406	0.016965	0.37937	0.97574	0.9137	-0.7226	0.81538	-13215	0.19472	31355	0.11802	0.16501	0.68246	0.59226	0.13974	10531	0.68989	-0.58458	0.21203	-16077	0.07351	29806
ASNA1	0.94008	-0.27375	0.77214	0.39247	0.16567	12084	0.79871	-0.3299	0.59844	-0.6122	0.82365	0.3429	0.60769	-0.79884	0.80439	-0.16766	0.27022	0.48864			0.70009	-13641	0.40875	0.73022	0.99853	-20599	0.78507	-0.3948	0.61335	-0.35107	0.65962	0.3817
ASNS	0.67256	-0.25426	0.75013	-0.07444	0.43673	0.14062	0.5385	-0.85839	0.19485	16332	0.79724	0.61812	0.21287	0.79389	0.89542	-0.49255	0.47164	0.48182	0.80343	-0.94962	0.59226	0.094663			0.1458	-0.43512	0.44389	-23103	0.43109	0.56709	0.49371	-19917
ASNSD1	0.55639	0.65558	0.38773	0.43195	0.8016	-0.011762	0.90782	0.15125	0.23394	0.95111	0.61227	-0.18601	0.72097	0.33748	0.36415	0.69123	0.13673	-0.03413	0.053308	44751	0.074709	20946			0.54199	-0.9073	0.50665	0.39664	0.33705	0.87803	0.9371	-12908
ASPA	0.17426	13819	0.67322	-0.251	0.1923	13798	0.4526	0.23941	0.28528	0.86053	0.82261	0.015841	0.23375	13413	0.79254	0.14392	0.23904	-0.071631	0.61347	0.47239	0.95991	-13993	0.11335	21575	0.60169	-0.31801	0.010314	21235	0.16583	12403	0.56637	-0.19
ASPDH	0.89225	-0.63231	0.88438	-0.33661	0.29031	0.81974	0.81381	-0.065472	0.95226	-0.75724	0.080529	14955	0.6961	-0.32145	0.80863	-0.42471	0.41241	0.048979	0.39319	18079	0.88614	-0.91201	0.063551	4247	0.83488	-0.24711	0.020514	16086	0.22086	1097	0.46325	0.9063
ASPG	0.75274	0.88972	0.69069	-0.65491	0.4216	0.38181	0.72233	0.13843	0.94416	-0.59442	0.60544	0.088079	0.65331	0.79658	0.80297	-0.6803	0.78699	-22667	0.23526	28359	0.86867	-10638	0.54504	-0.87966	0.55798	-0.29309	0.66449	-0.98862	0.04179	-0.96419	0.080857	27543
ASPH	0.98754	-0.639	0.041398	0.71502	0.71922	0.27168	0.37293	-0.68942	0.6002	0.23944	0.33421	0.67836	0.77073	-0.5054	0.95754	-0.60857	0.39845	0.58809	0.33364	21638	0.49405	-0.10205	0.47329	0.48789	0.26814	10633	0.33253	0.6533	0.01453	24656	0.78494	-0.81169
ASPHD1			0.22279	0.89796	0.088279	13156	0.90045	-0.47747	0.26624	0.31276			0.73161	0.5508	0.032706	15271	0.21967	-0.33451			0.020971	15467			0.46248	-0.45738	0.95581	-10616	0.155	10327	0.51831	0.12397
ASPHD2	0.97575	-15471	0.8123	-0.18504	0.079551	14763	0.002861	14025	0.87356	-0.15307	0.78412	-0.44973	0.52194	0.75707	0.86196	-0.82653	0.16403	1147	0.65845	12107	0.27256	0.83326	0.38765	-0.25984	0.24828	1201	0.19572	-13391	0.02948	12246	0.91375	-12058
ASPM	0.27099	13122	0.25286	0.94801	0.89632	-0.43483	0.68445	0.49476	0.48152	-0.33987	0.90688	-0.38432	0.14812	1444	0.17027	14231	0.16753	0.14012	0.94985	-26319	0.20349	-0.47394	0.020466	49617	0.52698	-19619	0.86137	-14366	0.66706	-11162	0.35884	0.95664
ASPN	0.57053	0.11636	0.57674	-0.22059	0.47166	0.17702	0.82422	-13739	0.33381	10415	0.84507	-0.45226	0.066232	18183	0.0589	0.40667	0.36951	0.13689	0.23237	28579	0.83704	0.38251	0.65823	-0.70337	0.23784	-0.073918	0.73514	-15172	0.48335	-0.47434	0.40882	0.66222
ASPRV1	0.29203	0.65394	0.96105	-0.41617	0.23842	0.914	0.12644	0.76937	0.97758	-11487	0.92094	-0.70289	0.66444	0.14021	0.76573	0.5588	0.59148	-0.63104	0.55885	0.77636	0.35553	-0.50413			0.77114	-12306	0.67176	-0.95047	0.5213	-0.22821	0.74404	-0.76563
ASPSCR1	0.11913	10452	0.10784	0.68102	0.14621	11092	0.67955	0.51927	0.047029	0.86517	0.80156	-0.10768	0.96336	0.022123	0.41713	-0.1874	0.692	-0.63359	0.30994	0.92281	0.36709	-0.4364	0.52457	0.58418	0.55556	-0.47362	0.82423	-0.39997	0.45362	-35147	0.44023	0.82725
ASRGL1	0.049087	20622	0.49495	0.50366	0.22795	0.87105	0.77244	-0.76132	0.24944	12125	0.76343	-11534	0.046803	17755	0.80374	0.57065	0.17502	1338	0.18548	30795	0.015847	17633			0.24953	13719	0.58368	-0.80833	0.35261	0.70226	0.56104	0.63142
ASS1	0.44819	0.54623	0.24902	0.69927	0.85522	-0.40296	0.71892	0.40912	0.99482	-22416	0.21776	0.98476	0.86543	-0.15169	0.93382	-0.68394	0.39098	-11329	0.51101	10483	0.79439	-14187	0.38828	15514	0.35385	-0.087623	0.68686	-11755	0.9982	-24481	0.095837	1569
ASTE1	0.0023036	30488	0.74415	0.47671	0.030339	17856	0.18279	0.11169	0.11454	15968	0.14757	10467	0.41633	-0.28949	0.57706	-0.18384	0.69591	-0.14671	0.55021	0.86596	0.83717	-0.4542			0.52018	0.24408	0.046981	21843	0.45896	-0.2248	0.34722	10379
ASTL	0.70196	0.71646	0.57441	0.20957	0.97299	-0.79425	0.97767	-0.86813	0.19087	14697	0.69054	0.75854	0.70073	0.082612	0.84472	0.38122	0.13537	10505	0.95573	-27298	0.70202	-0.51218	0.32237	1552	0.018465	1492	0.37348	-0.27651	0.7591	0.31656	0.11322	14848
ASTN1	0.8423	0.14056	0.61741	0.27605	0.81451	-0.11949	0.75175	0.51482	0.99712	-10084	0.019107	14064	0.30678	12554	0.42283	0.47041	0.80227	-0.64157	0.11496	37839	0.87883	-0.060095			0.48635	-10351	0.21148	0.65709	0.74738	-13979	0.21392	18354
ASTN2	0.73239	-0.45992	0.33732	0.61013	0.60324	0.68754	0.59381	-0.50041	0.24426	14376	0.77192	-0.29742			0.69762	0.055053	0.60858	-0.49822	0.54215	0.95032	0.70117	-10703			0.53896	0.47442	0.82967	-19487	0.965	-1.61	0.87625	-1581
ASUN	0.17126	0.64489	0.12777	0.27266	0.29959	-0.21957	0.99373	-13906	0.7093	-0.37906	0.019806	23785	0.25569	12126	0.56158	-0.30369	0.51836	-0.4203	0.79691	-0.88453	0.83718	-12811	0.90348	-24948	0.26656	10007	0.48647	0.45027	0.8975	-17285	0.20182	-0.32512
ASXL1	0.88208	-0.97459	0.77721	-0.089613	0.0028481	31314	0.88912	-0.21802	0.79573	-0.509	0.86543	-0.81309	0.095279	13486	0.25437	11586	0.20765	0.37207	0.55152	0.95462	0.27274	0.55064	0.0053112	56397	0.35342	0.62021	0.93731	-14716	0.56099	-0.64673	0.84961	-0.61794
ASXL2	0.30006	0.35741	0.76603	0.12955	0.75683	-0.054023	0.5779	-0.090487	0.26662	1339	0.2372	10792	0.41076	0.21096	0.42439	0.28706	0.52841	0.21876	0.074156	41255	0.52776	0.27631	0.29272	0.72842	0.84986	-0.33655	0.00026128	2903	0.74092	-0.51426	0.92574	-19866
ASXL3	0.63337	0.51628	0.74339	-0.45023	0.37172	0.55677	0.14992	0.71237			0.48824	-0.16517	0.080112	21476	0.10012	13073	0.00034188	19109	0.5184	1053	0.39695	-10476	0.44302	0.63889	0.43314	0.068473	0.36988	0.35715	0.65315	-0.90183	0.6323	-0.19947
ASZ1	0.66572	-0.1802	0.026155	15371	0.79167	-0.53095	0.45423	-0.047962	0.57339	-0.24584	0.38021	-0.71974	0.4243	0.91195	0.72715	-0.16557	0.34529	-0.14256	0.32266	22121	0.20353	0.78656	0.59339	0.012684	0.14079	11902	0.022198	18117	0.010031	25579	0.030773	20847
ATAD1	0.12246	15347	0.80052	0.080504	0.014513	19572	0.31039	0.6792	0.71226	0.72931	0.3373	0.96742			0.65778	0.18688	0.045518	0.70855	0.58997	0.61779	0.58895	-0.72311	0.9725	-26202	0.39191	0.68931	0.36701	0.81394	0.46189	0.76767	0.32614	12866
ATAD2	0.82927	0.040983	0.55347	-0.29301	0.91303	-11411	0.22605	0.26245	0.12687	0.87028	0.7828	0.13978	0.93773	0.18421	0.71289	-13437	0.64151	-0.7665	0.99097	-2884	0.5577	-0.18023	0.0037773	28388	0.89412	-29184	0.77851	-15018	0.25156	12601	0.36003	10999
ATAD2B	0.30365	10178	0.36135	0.57504	0.3144	-0.50365	0.54162	0.064228	0.73402	-0.42875	0.96053	-10413	0.11327	15432	0.78028	0.040746	0.90634	-18822	0.21694	30245	0.71957	-0.23095	0.94674	-19425	0.36415	0.59184	0.4088	0.61771	0.51126	0.6364	0.64528	0.39489
ATAD3A	0.43238	0.58481	0.38723	0.048259	0.29505	10574	0.37045	-0.35383	0.82128	-0.44331	0.56392	0.20586	0.78873	0.097066	0.054994	0.94096	0.38193	0.16651			0.30724	-0.3306	0.5904	-0.28911	0.98444	-16555	0.8326	0.10579	0.51682	-0.097617	0.36091	0.8406
ATAD3B	0.46472	10672	0.90862	-0.75593	0.64643	0.57656	0.029984	16952	0.54159	0.30001			0.10529	19883	0.46581	0.59704	0.0041993	23027	0.39849	20171	0.44151	-14984			0.72568	-0.4624	0.46869	0.13591	0.44497	0.83764	0.67948	0.50187
ATAD3C	0.42767	0.31927	0.68804	-0.26253	0.72687	0.19453	0.52883	0.16565	0.65373	-0.078836	0.55185	0.28034	0.55351	0.83542	0.77238	0.71481	0.62279	-11869	0.34118	2465	0.70809	0.47665	0.15738	28711	0.9947	-16263	0.3082	-0.48588	0.3786	0.63881	0.83554	-11181
ATAD5	0.80572	-0.23202	0.045209	0.37924	0.33051	0.97888	0.32501	0.63003	0.42462	0.48431	0.96139	-0.63026	0.84415	-0.58296	0.52426	0.32964	0.89538	-0.90954	0.22062	29194	0.25927	11278			0.18978	15199	0.91876	-0.97923	0.8995	-11306	0.082968	20807
ATAT1	0.083398	11643	0.045852	13176	0.21185	14502	0.12299	-0.50205	0.76499	0.0054224	0.87695	-0.41167	0.42281	0.35573	0.27849	0.67423	0.68764	0.036144			0.07712	15687	0.45781	0.5474	0.27189	1034	0.20565	0.23534	0.52756	-0.57625	0.07159	20234
ATCAY	0.53547	0.70118	0.030201	0.43316	0.31461	0.22187	0.010212	13542	0.38286	0.2911	0.70592	0.3831	0.01456	21604			0.69997	0.42857	0.89992	-19533	0.20667	10084	0.56834	-0.13758	0.56336	-0.034795	0.32054	0.36801	0.18708	17128	0.74929	-0.93257
ATE1	0.15136	0.80686	0.81303	0.2206	0.73107	-0.34103	0.77038	-0.11236	0.9888	-20002	0.53443	0.4153	0.69473	0.21701	0.42219	0.87493	0.23626	0.028027			0.0041549	21639			0.013673	26897	0.12073	0.60545	0.94528	-29009	0.89779	-11556
ATF1	0.20867	1233	0.086455	-0.24773	0.16987	11135	0.46154	-0.62566	0.81635	-0.42706	0.79574	0.00029491	0.921	-0.65054	0.48636	-0.0058026	0.47913	0.17775			0.19369	0.88969	0.23266	17491	0.095451	10152	0.0053323	0.71812	0.82657	-0.61	0.21705	-0.38636
ATF2	0.72967	-0.5477	0.26326	0.96487	0.80159	0.065181	0.49801	-0.22278	0.327	0.45024	0.77657	0.13716	0.29739	-0.59366	0.88849	-0.48438	0.55567	-0.5721			0.75729	-11012	0.26655	22678	0.37584	-0.96072	0.23818	0.6084	0.29969	12389	0.91895	-12644
ATF3	0.19487	1222	0.26201	0.9036	0.31575	0.91154	0.81924	-0.49858	0.83638	0.50776	0.17078	13544	0.10215	13389	0.47662	0.72906	0.089525	0.86068	0.6033	0.51947	0.43045	-0.31642	0.2657	0.63805	0.6443	-10062	0.37046	0.075381	0.53902	0.70764	0.44235	0.46195
ATF4	0.95413	-0.78455	0.98121	-19744	0.60109	0.65575	0.055482	11191	0.60513	0.024394	0.96926	-1166	0.58126	-0.23328	0.62756	0.11677	0.68269	-0.82484	0.91587	-2.15	0.60999	0.17927	0.38027	0.52979	0.18637	13275	0.26621	0.22936	0.88103	-0.95526	0.93444	-0.26765
ATF5	0.98309	-12041	0.80946	-0.67056			0.27243	0.65196	0.60046	0.88957	0.40129	0.98008	0.11682	13537	0.7022	-0.31867	0.58758	0.22425	0.35388	16749	0.73296	-0.85891	0.53104	0.10397	0.96278	-15453	0.064499	0.15986	0.73289	-1269
ATF6	0.16002	16062	0.90056	-0.20409	0.88933	0.094407	0.19112	0.41253	0.42458	0.24848	0.79939	0.35453	0.97884	-0.48183	0.98809	-13009	0.78308	-0.23273			0.41345	0.52021	0.64368	-0.5083	0.91373	-23734	0.74468	-0.143	0.91616	-0.45442	0.94747	-13123
ATF6B	0.57168	0.70409	0.43177	0.49042	0.35145	-0.2803	0.50905	0.28892	0.42729	0.95205	0.021204	19155	0.37855	0.72389	0.29461	0.95041	0.90323	-0.065414	0.36649	19461	0.94933	-15618	0.22647	21804	0.82966	-0.76251	0.13787	16152	0.32247	-12031
ATF7	0.14777	14933	0.48491	-0.11745	0.35826	0.68372	0.35963	0.49717	0.028815	28923	0.066085	2028-01-01	0.075018	13852	0.24266	1032	0.80587	-0.38914	0.72478	-16076	0.35167	0.80213			0.92907	-25738	0.0097532	22531	0.79799	0.25505	0.848	-15454
ATF7IP	0.2775	0.48926	0.55573	0.0069469	0.39725	0.30743	0.025308	12709	0.98522	-12337	0.6309	0.34374	0.93959	-0.18308	0.479	0.61127	0.57352	-0.33536	0.4004	17944	0.78987	-0.42031	0.74798	-0.0015485	0.51375	-0.55789	0.73222	-21615	0.95413	-11624	0.64127	0.46484
ATF7IP2	0.67638	0.20042	0.32961	-0.39248	0.82524	0.34176	0.77146	0.32603	0.077798	0.42582	0.63827	0.77207	0.97893	-0.1413	0.8134	-0.43842	0.16597	0.53722	0.43351	0.97653	0.73975	-10194	0.86394	-21612	0.59176	0.11494	0.52663	-0.055282	0.18122	0.19144	0.95861	-29683
ATG10	0.056848	21378	0.52898	0.65992	0.58017	0.16968	0.3224	0.94453	0.37141	13252	0.43362	11018	0.60403	0.059004	0.75152	0.35733	0.37494	-0.68192			0.24931	0.65128					0.54122	-0.96185	0.70246	-11547	0.086704	28889
ATG12	0.99082	-0.67941	0.15032	-0.78152	0.71946	0.24903	0.95384	-0.58111	0.34691	-0.75851	0.068907	0.45067	0.35757	-1.08	0.83758	-0.52125	0.86038	-0.90119	0.61388	11705	0.97385	-11315	0.70918	-11165	0.13541	16276	0.08766	0.82779	0.84874	-0.36859	0.88346	-13172
ATG13	0.57474	-0.32019	0.99411	-1128	0.19986	0.24541	0.81619	-0.26377	0.92995	-0.286	0.33943	0.73466	0.82296	0.36064	0.51708	0.37068	0.70637	-12105	0.86497	-15758	0.88433	-2098	0.75209	0.21816	0.34169	0.56735	0.91275	-0.57281	0.71004	0.092807	0.43292	10602
ATG14	0.96631	-15325	0.56138	0.093643	0.88388	-0.62752	0.75327	0.41138	0.050124	13148	0.79631	0.6654	0.52825	0.40266	0.21966	0.90406	0.7268	0.46188			0.77266	0.28512			0.99307	-28119	0.21908	-12795	0.38435	-0.75377	0.77064	-1.23
ATG16L1	0.89702	-0.53222	0.97843	-0.53856	0.44178	0.36869	0.91926	-0.27364	0.20621	12937	0.41856	-0.37341	0.7127	-0.37109	0.97451	-0.37861	0.53637	-0.84926	0.75759	-0.58145	0.38435	0.25995	0.56628	0.52769	0.65528	-16585	0.91766	-22971	0.3658	-10651	0.72612	-0.22471
ATG16L2			0.083853	10555	0.86028	-0.7575	0.67828	-0.56118	0.81077	-0.74076	0.76721	0.14751	0.58306	0.18876			0.20995	-10565			0.78274	-0.45074			0.86356	-2131	0.16211	16141	0.45206	0.67947	0.73617	-11868
ATG2A	0.28469	0.34476	0.87582	-19028	0.83683	-10974	0.62811	-0.14007	0.42722	10156	0.92296	-0.11595	0.25302	11157	0.5156	-1163	0.22724	0.88694	0.54438	15904	0.48166	-0.6672	0.62983	-22776	0.58621	-0.74609	0.19466	-0.11785	0.13647	0.52758	0.2246	-0.74463
ATG2B	0.63499	0.17929	0.38325	0.27119	0.38546	-0.44159	0.082138	0.77927	0.92635	-0.81595	0.53294	-0.9039	0.066477	0.37954	0.070278	0.93548	0.81922	-0.27773	0.33882	18042	0.84684	-18979	0.55005	-0.82664	0.97365	-0.94802	0.91474	-10242	0.80101	-0.71242	0.74741	-0.37231
ATG3	0.2121	11148	0.67515	0.062955	0.051981	17546	0.35696	-0.24619	0.50344	0.4931	0.45085	0.55791	0.66183	10658	0.60765	0.47762	0.81586	-15391	0.03788	41709	0.88475	-0.68841	0.76674	-14082	0.53011	0.61921	0.076263	20137	0.77035	-11705	0.82108	-17394
ATG4A	0.54773	0.46041	0.95187	-0.82864	0.48044	0.033266	0.37435	0.21081	0.36952	0.79246	0.96878	-0.48736	0.13817	13439	0.76861	0.12422	0.92343	-19527			0.46801	-0.61207	0.21793	0.72087	0.99047	-22403	0.15731	13133	0.94924	-0.82764	0.11522	-0.63108
ATG4B	0.4718	0.56264	0.80035	-0.63806	0.79752	-0.60086	0.23162	-0.11793	0.54876	0.56982	0.47974	11645	0.047114	27146			0.62146	-0.60792	0.02672	49986	0.034401	22263	0.95006	-29656	0.61264	0.35623	0.92948	-0.13322	0.30464	-20093	0.8632	-0.8785
ATG4C	0.504	0.19909	0.28941	-0.020401	0.028823	26291	0.24591	0.16984	0.05641	0.53031	0.35	0.80037	0.53656	-0.0055241	0.48498	0.039483	0.47022	0.36713	0.51322	17681	0.87862	-18553			0.12683	0.70171	0.55145	-0.27363	0.54689	0.082588	0.19092	-0.13856
ATG4D	0.00077242	29754	0.63739	0.11129	0.5808	0.32591	0.78977	0.34112	0.10772	19402	0.87473	-0.34394	0.36745	0.95959	0.15852	0.86326	0.98508	-19968	0.68113	-0.51111	0.46007	-0.27792	0.083836	38203	0.91338	-0.88326	0.26227	0.90367	0.40479	-0.39669	0.3897	0.30296
ATG5	0.69969	-0.73233	0.56972	-0.64512	0.98036	-0.35926	0.81957	-0.49111	0.46056	0.29683	0.49766	0.75273	0.82236	0.031842	0.35706	-0.83034	0.72495	-15669	0.48319	12278	0.85164	-11375	0.76165	-13915	0.63737	-0.89493	0.89948	-14806	0.46414	0.58757	0.5848	0.65311
ATG7	0.29543	12411	0.59757	0.47748	0.45555	0.8309	0.56204	0.11026	0.75857	-0.6644	0.32578	0.9877	0.53815	-0.026105	0.74076	0.090327	0.88679	-0.36179	0.97189	-11607	0.97307	-0.82387	0.46977	10179	0.77929	-0.52306	0.41665	0.64692	0.98249	-18718	0.34704	0.9716
ATG9A			0.14481	0.99827	0.79196	-0.70524	0.33437	0.48711	0.66466	-0.084894	0.082248	12958	0.49679	-0.27613	0.929	-0.61811	0.79285	-0.37083			0.28008	0.9317	0.89546	-0.1961	0.42099	-0.26121	0.088347	0.224	0.012358	27202	0.35092	13266
ATG9B	0.36332	-0.9111	0.49162	-0.24729	0.32138	-0.079869	0.54384	-0.68782	0.96467	-0.78959	0.48792	-0.77071	0.092361	18405	0.35363	0.63404	0.54387	0.082815	0.96357	-24393	0.98705	-16813	0.69778	-0.96152	0.80583	-0.45561	0.29755	0.85518	0.71422	-0.88387	0.87958	-12593
ATHL1	0.34279	10361	0.034832	19512	0.81607	-0.63745	0.96024	-1517	0.42177	0.6058	0.60689	0.075334			0.87177	-0.93236	0.67686	-0.12044	0.084121	4006	0.64259	-0.88088	0.364	12825	0.64477	-0.069326	0.98096	-14737	0.34571	10764	0.86404	-20617
ATIC	0.2024	0.60213	0.38865	-0.0097703	0.25321	10753	0.74165	-0.53528	0.10707	12259	0.94521	-0.48017	0.57746	0.55999	0.42151	-0.20371	0.14975	11493	0.60531	0.53811	0.18109	12145			0.73852	-0.58805	0.41525	0.66261	0.25492	13115	0.26768	14295
ATL1	0.91413	-11655	0.49978	0.45707	0.76916	-0.17547	0.92469	-0.40425	0.18928	0.55872	0.37449	0.042183	0.87146	0.52927	0.16674	0.22645	0.3312	-18049	0.76916	-0.67062	0.61375	0.016587			0.45652	0.27898	0.40761	0.6388	0.23787	13535	0.76827	-0.35072
ATL2	0.30635	0.74649	0.16733	0.36344	0.3051	10907	0.64271	0.48358	0.69194	-0.31145	0.31498	0.69288			0.94109	0.31111	0.74563	-0.96116	0.8391	-12943	0.30584	-0.13862	0.15985	28432	0.2644	0.12858	0.527	-0.56877	0.29332	11811	0.13881	17483
ATL3	0.1062	14123	0.80698	-0.21496	0.3785	0.60669	0.64725	-0.022084	0.4121	0.65354	0.56418	0.48294	0.90614	-0.55078	0.072826	14236	0.70592	-0.089764	0.24227	17246	0.88726	-18693	0.29799	13416	0.43362	-0.37434	0.95014	-0.99511	0.54673	-0.67114	0.97306	-31399
ATM	0.74241	-0.5565	0.21812	0.71041	0.9523	-0.46154	0.64197	0.053569	0.98081	-0.82569	0.71825	0.26086	0.8867	-0.10318	0.1607	0.80088	0.45434	0.10824	0.89529	-16603	0.037405	1129	0.71158	-1.9	0.29669	-0.81815	0.33125	0.74959	0.96922	-0.85098	0.607	-0.90219
ATMIN	0.033445	20543	0.8877	-0.50657	0.72743	-0.29517	0.51263	-0.41732	0.25008	13525	0.35809	0.58537	0.57082	0.30944	0.58011	0.34715	0.35913	0.45008	0.42662	16739	0.0089359	29175	0.001807	61789	0.09346	19714	0.77763	-0.4609	0.50507	-0.043365	0.53661	-0.017754
ATN1	0.83806	-0.37186	0.35918	0.66129	0.038982	0.66401	0.38395	0.58676	0.0742	1872	0.49987	0.88968	0.39093	0.94463	0.0012812	38044	0.93152	-0.88974			0.9085	-23905			0.30678	0.34894	0.74758	-0.5641	0.18754	1591	0.84412	-18667
ATOH1	0.056253	22363	0.68385	0.31084	0.077625	11426	0.40487	-0.39114	0.75829	-0.35134	0.96713	-0.43626	0.18519	0.74883	0.81954	-0.73814	0.076129	0.36229			0.060138	17848	0.67858	-0.79256	0.66765	0.28535	0.32027	0.91297	0.074725	16605	0.096254	26809
ATOH7	0.57628	0.11302	0.77325	-0.7091	0.73558	-0.53498	0.67012	0.55224	0.85676	-0.099509	0.90873	0.055386	0.48563	0.53081	0.59518	0.26564	0.33638	0.020275	0.3874	18948	0.033705	20367	0.97375	-12734	0.518	-17212	0.69081	-0.88443	0.44358	0.19829	0.36986	10089
ATOH8	0.1012	13025	0.75287	-0.6657	0.24992	11925	0.38676	0.54569	0.57206	0.84199	0.82049	0.51282	0.55127	0.22126	0.86394	-0.057065	0.018524	22621	0.30836	24052	0.27388	0.93201	0.58641	-0.065148	0.1353	2028-01-01	0.50617	0.049547	0.74371	0.44564	0.52749	0.38969
ATOX1	0.69677	-0.58332	0.47594	0.025049	0.51642	0.26997	0.14828	0.98611	0.56078	10078	0.64159	0.75399	0.016431	26888	0.31951	0.83123	0.30582	-0.75233	0.85635	-0.80667	0.99927	-22715	0.4331	0.99144	0.87543	-0.87442	0.53296	-0.68472	0.58624	-0.49436	0.62445	0.2692
ATP10A	0.11668	15557	0.9062	0.30183	0.49143	0.045477	0.21277	0.63649	0.39422	10477	0.30318	0.32064	0.53839	0.86284	0.043981	18023	0.83958	-13153	0.097402	34317	0.11143	0.28345	0.14139	13563	0.90163	-12091	0.31346	0.97863	0.39344	0.92884	0.15654	23599
ATP10B	0.72197	0.41347	0.40147	0.64341	0.46287	0.47783	0.016392	-0.3848	0.51018	-0.1887	0.35944	0.15552	0.23897	1286	0.10039	14698	0.45685	0.12657	0.43761	21559	0.06992	-11029	0.031822	46771	0.72251	-0.42828	0.5479	-0.22238	0.15124	16498	0.026234	19689
ATP10D	0.36003	0.48492	0.7461	0.19049	0.86313	0.43104	0.14475	11314	0.27109	11666	0.77095	0.70727	0.96185	-0.75389	0.039673	14846	0.49006	-0.26441	0.17196	3108	0.80719	-0.95458	0.93439	-15945	0.65563	0.10625	0.1116	0.80117	0.44387	-0.87069	0.17948	20294
ATP11A	0.19303	1517	0.24001	0.89298			0.89054	-0.55738	0.62454	-0.01559	0.72318	-0.10333	0.80048	-0.48607	0.34717	0.82644	0.29622	-0.22137			0.19981	0.905	0.68381	-0.73995	0.67168	-0.66723	0.013762	24484	0.30358	0.31091	0.95353	-0.62091
ATP11AUN			0.80627	-0.036145	0.81509	-0.65205	0.33289	0.74948	0.012052	25946	0.96598	-10113	0.87485	-0.8994	0.10592	16161	0.32105	0.80193			0.60096	-0.62547	0.19366	21575			0.30741	0.9614	0.047053	24009	0.92168	-25477
ATP11B	0.63841	0.7344	0.094584	14238	0.45467	0.38663	0.029089	1738	0.2546	1382	0.45497	0.78737			0.47191	0.81977	0.74071	-0.68487	0.070632	41075	0.41852	-0.047038					0.038399	1436	0.32023	0.30612
ATP11C	0.24313	1059	0.3788	0.7317	0.83319	-0.52123	0.34669	0.52516	0.16493	0.72261	0.52708	-0.38354	0.14935	10197	0.024904	14822	0.60073	-0.99728	0.36898	0.48498	0.49125	-0.35603	0.48076	-16484	0.75226	-14633	0.95157	-0.67188	0.31187	0.79311	0.35611	0.9229
ATP12A	0.049727	12046	0.37615	0.53976	0.3141	0.96592	0.70337	-0.27698	0.50111	0.34265	0.81166	0.07155	0.92279	-0.048508	0.60451	0.20563	0.92568	-1201			0.62969	-0.72755	0.51042	0.5006	0.22138	-16886	0.14039	-0.71174	0.15343	14989	0.1099	16385
ATP13A1	0.16942	0.06982	0.84257	-0.61356	0.21877	12589	0.83047	-0.80945	0.34314	0.59872	0.21418	-0.093901	0.52179	0.10699	0.16609	10694	0.6532	-0.80874			0.77947	-0.59175	0.62538	-0.47356	0.019415	1992	0.090482	0.78412	0.2885	12513	0.88774	-0.14193
ATP13A2	0.35879	0.68401	0.70291	0.32281	0.1467	14327	0.99769	-1.21	0.17014	0.90529	0.83166	-0.45252	0.25011	0.82179	0.65033	-0.41233	0.55535	-0.21082			0.49012	-0.38091	0.26256	18811	0.80101	0.0082796	0.7374	-11852	0.10008	24638	0.47329	-0.25966
ATP13A3	0.92008	-11563	0.40497	0.58268	0.77089	0.82857	0.10129	0.9382	0.31581	0.6998	0.71997	-0.36383	0.87613	0.23459	0.026946	14392	0.0023251	19331			0.10496	0.2598	0.83864	0.49673	0.23788	0.78805	0.18678	-0.6808	0.94815	-0.96878	0.52561	0.026133
ATP13A4	0.91431	0.3944	0.51629	-0.0011853	0.30369	10031	0.39169	0.2728	0.65332	-0.15425	0.55371	0.65392	0.11227	17299	0.34468	0.70908	0.6337	-15425	0.50695	10187	0.71778	-18113	0.72893	-0.2933	0.02108	0.73047	0.44479	-0.59739	0.46496	0.66453	0.85771	-0.65988
ATP13A5	0.11835	18905	0.47287	0.65661	0.88932	-0.90754	0.62824	-0.021332	0.28604	12179	0.77546	-0.4968	0.74816	-0.17499	0.85656	-0.7069	0.68855	-0.90075	0.34867	21606	0.3321	0.86467	0.55966	-0.089174	0.76766	0.088812	0.18492	14442	0.91072	-2499	0.70522	-0.98189
ATP1A1	0.12892	13228	0.46881	0.30942	0.72349	0.15597	0.87864	-0.73257	0.98495	-1346	0.17518	12047	0.84886	-0.32918	0.36675	0.40135	0.53877	-0.7608			0.7004	-0.10451	0.2257	21961	0.9283	-18992	0.37832	0.33291	0.059666	0.8866	0.86281	-20486
ATP1A2	0.27804	0.7313	0.0092021	18144	0.82951	-0.37268	0.30444	-0.39175	0.34801	0.54023	0.31419	0.97804	0.40449	-0.11296	0.90217	-0.66236	0.92445	-0.54639	0.4336	15584	0.94746	-0.85787	0.39388	0.98682	0.50538	-0.16332	0.26483	0.1388	0.66953	-0.71091	0.96171	-0.91645
ATP1A3	0.54291	0.25579	0.12127	10073	0.72755	-0.42607	0.12603	-0.015808	0.69733	0.0050295	0.31004	0.46214	0.72787	-0.35567	0.032221	14571	0.55157	0.2013	0.48624	11063	0.78801	-0.010756	0.80747	-1358	0.45191	0.011866	0.59556	0.49476	0.80814	-1.8	0.61738	-0.10947
ATP1A4	0.24663	12061	0.39736	0.31441	0.013545	16593	0.91325	-0.23146	0.50722	0.058966	0.88623	-0.36774	0.42427	0.79889	0.28737	10741	0.94179	-0.61467	0.45142	15135	0.83483	-15114	0.70121	-0.91315	0.73052	-13358	0.78216	-0.41244	0.42708	-0.059782	0.78188	-14768
ATP1B1	0.15664	0.37025	0.0045725	22623	0.061024	14404	0.23101	-0.1922	0.33546	0.67221	0.38876	0.98201	0.91179	0.31437	0.66093	0.058893	0.93316	-12286	0.81564	-10613	0.75772	-13184	0.044037	37194	0.63942	-0.0055565	0.38855	-0.31814	0.15693	20667	0.11475	0.44079
ATP1B2	0.97401	-0.86673	0.6497	0.26168	0.50635	0.2952	0.96525	-0.39539	0.48105	0.84755	0.59945	0.57203	0.82654	0.20868	0.29593	0.68851	0.919	-0.83433	0.58188	0.6387	0.96442	-16232			0.86857	-0.19995	0.88537	-14424	0.81363	-0.71653	0.64727	-0.49177
ATP1B3	0.085604	20202	0.26091	0.77155	0.77905	0.7499	0.60071	0.022237	0.78135	0.40657	0.57787	0.30636	0.0059566	13279	0.25143	10775	0.66183	-12955			0.81061	-1585			0.54939	-23968			0.57723	-2428	0.58665	-0.3184
ATP1B4			0.27647	0.80767			0.93486	-1307			0.84878	-0.58181	0.069223	24096	0.19827	11942					0.0064119	19093			0.90219	-23892			0.69953	-11355	0.0069264	44344
ATP2A1	0.068284	-0.42717	0.96196	-0.279	0.04982	13751	0.50533	0.43379	0.91721	-1205	0.096765	12676	0.73553	0.13033	0.96313	0.12641	0.52724	-0.042486	0.97062	-29985	0.47611	0.49555	0.76177	-13942	0.92082	-17548	0.29707	0.4664	0.52026	-0.529	0.79101	0.085058
ATP2A2	0.87195	0.40622	0.3303	-0.050819	0.6441	0.30014	0.96461	-0.028065	0.26473	0.90083	0.16641	13656	0.3631	10525	0.35626	0.87334	0.82749	-16728	0.78608	-0.79623	0.68742	-0.051346	0.29776	17787	0.63035	-19858	0.71587	-0.36919	0.57373	0.06991
ATP2A3	0.045142	2275	0.40971	0.098686	0.2224	-0.53684	0.75532	0.11281	0.68874	-0.16525	0.18165	11399	0.81033	0.30875	0.3069	0.94437	0.49787	-0.3774			0.026544	2264	0.34289	12701	0.11003	2013-01-01	0.99326	-18223	0.19007	-0.75799	0.92154	-13406
ATP2B1	0.5081	0.94398	0.8175	-0.018171	0.068418	13421	0.84241	-0.13533	0.63916	-0.072689	0.85601	0.026877	0.30188	15057	0.7829	-0.17446	0.59969	0.45682	0.50721	11844	0.89966	-13957			0.22894	12751	0.98686	-16289	0.77685	-15813	0.90349	0.28825
ATP2B2	0.86031	-0.36398	0.040163	18522	0.14766	0.46936	0.056633	12012	0.66088	-0.16617	0.68644	-0.31804	0.95149	-0.78749	0.79969	-0.104	0.25767	0.92691			0.33968	0.59645			0.67106	0.21134	0.021078	19902	0.10471	23087	0.7576	-14574
ATP2B3	0.40404	0.71039	0.58012	0.59086	0.11524	13951	0.71036	0.61165	0.4455	0.63161	0.78936	0.3324	0.71624	0.91999	0.047402	15332	0.10874	0.40966			0.25983	0.51758	0.64592	-0.60943	0.012009	11366	0.1893	-0.46877	0.38269	0.51768
ATP2B4	0.32472	0.83243	0.9476	0.034675	0.32456	0.28777	0.80476	-0.39371	0.71355	-0.55204	0.38056	0.72722	0.93105	-12038	0.51496	0.54814	0.0085584	0.74542	0.61637	0.42748	0.039275	12322	0.98748	-37312	0.7854	0.027409	0.83255	-0.31981	0.3611	0.78848	0.16438	23885
ATP2C1	0.50162	-0.044214	0.43568	0.12103	0.36105	0.77605	0.82603	0.26785	0.6198	0.8821	0.41324	0.8027	0.77629	0.5349	0.65832	-0.16523	0.57565	-0.22737	0.42958	19018	0.80253	-0.74376	0.94928	-29542	0.25805	0.97699	0.82171	-18869	0.19534	16065	0.59783	-0.49187
ATP2C2	0.49048	0.95946	0.63923	-0.3751			0.37957	0.80424	0.29824	0.54408	0.92848	-0.3773	0.66352	-0.030165	0.10459	17801	0.78302	-0.57524			0.52095	-0.054664	0.098088	38442	0.54641	-0.35763	0.51136	-0.31396	0.087044	2284	0.10971	0.4265
ATP4A	0.87255	-0.94561			0.9262	-10945	0.085544	13621	0.88197	0.25828	0.74406	0.42291	0.15322	0.80969	0.58713	-0.56626	0.58919	-10554			0.5126	0.25726	0.30887	16804	0.86774	-0.69909	0.53687	-0.42324	0.63904	-0.72087	0.98693	-22205
ATP4B	0.90671	0.16346	0.22084	0.57684			0.50136	0.13964	0.64383	0.58051	0.20548	0.6673	0.38598	0.77604	0.6136	0.19728	0.72842	-12873	0.29739	24859	0.52999	-0.33142	0.85015	-20303	0.094636	18012	0.061972	0.19454	0.7018	-0.13434	0.14298	0.99901
ATP5A1	0.99583	-13033	0.98547	-0.43585	0.18821	12044	0.91237	-0.37136	0.40095	0.51431	0.17976	11008	0.58826	0.61732	0.73274	-0.064951	0.47061	-18445			0.97553	-13728	0.98864	-25897	0.79981	-12408	0.08797	10962	0.40039	-0.88639	0.83319	-12353
ATP5B	0.52891	0.24736	0.7336	-0.41723	0.31502	0.55785	0.082843	0.95625	0.73895	-0.22509	0.38944	0.36364	0.64377	0.3557	0.70741	-0.33604	0.86733	-11718			0.15835	15686	0.20625	24901	0.40558	0.70182	0.82595	-0.70398	0.89513	-18277	0.013195	36357
ATP5C1	0.87513	-0.79725	0.99434	-0.86674	0.41534	-12264	0.88741	-0.042009	0.74814	0.38888	0.79722	-16014	0.4465	-0.51895	0.83858	-10747	0.96295	-12845	0.44648	15216	0.24847	0.52795	0.29225	0.81751	0.98903	-11072	0.90164	-0.70524	0.16806	12171	0.69239	-17416
ATP5D	0.69908	-0.99124	0.82401	0.17808	0.16537	14591	0.5903	-0.58801	0.91275	-0.33347	0.81309	0.075391	0.44867	0.57186	0.74866	-0.33049	0.24691	0.25252	0.1126	28497	0.89391	-23438			0.56419	-0.51807	0.50412	-0.58554	0.27681	0.47284	0.54178	-0.80002
ATP5F1	0.35621	0.83403	0.26319	0.992	0.1693	1547	0.86461	0.10754	0.6095	0.052589	0.56285	0.22045	0.10308	0.77266	0.92312	-0.58637	0.85356	-0.54716			0.41137	0.5631			0.82088	-14286	0.28171	10934	0.27266	0.88312	0.41697	0.94943
ATP5G1	0.72422	-0.35803	0.41546	0.22998			0.52082	0.35535	0.92438	-11756	0.94332	-0.41937			0.51784	0.24074	0.4158	-0.74807	0.049885	44773	0.73569	-0.72006			0.73317	-0.51171	0.63683	-10031	0.12853	21484	0.76109	-0.74315
ATP5G2	0.83642	-0.81315	0.5513	0.059047	0.3888	0.49673	0.40968	0.44983	0.36588	0.87805			0.55592	0.91104	0.29799	0.94411	0.49365	-0.071443	0.81222	-10192	0.85402	-13501	0.18894	26188	0.56131	-0.36553	0.9407	-1494	0.29325	11259
ATP5G3	0.35553	0.46974	0.36925	0.44301	0.57576	0.1266	0.98812	-0.70587	0.13124	18682	0.88608	0.35882	0.53645	0.62054	0.65666	0.71094	0.41976	0.26264	0.70851	-0.18318	0.77472	-12348	0.15553	0.95816	0.077349	10708	0.78417	-0.39157	0.54076	-0.76896	0.68774	0.17783
ATP5H	0.68374	0.88911	0.93181	-0.0095275	0.71866	-0.31165	0.32393	-0.059285	0.33889	0.90348	0.53824	-0.050216	0.17272	0.8406	0.70722	-0.19664	0.25874	0.75393			0.039389	2108			0.28056	12396	0.73016	-11514	0.96983	-15965	0.74676	-0.19399
ATP5I	0.33303	0.85285	0.77259	0.16933	0.013742	24049	0.59507	-0.15476	0.90147	-0.30656	0.95114	-0.46457	0.91264	-0.68718	0.99765	-14306	0.0020894	20732			0.07595	1053			0.63642	-13837	0.0025758	0.4512	0.10939	21659	0.98746	-20475
ATP5J	0.12607	0.19668	0.067486	11551	0.19731	13511	0.041316	0.96112	0.21982	0.32369	0.94254	-0.30972	0.68795	0.51223	0.91793	-0.24971	0.30776	0.82794			0.25232	-0.50579	0.97598	-33897	0.21443	0.78053	0.718	-0.2586	0.81099	-13763	0.68273	-0.44075
ATP5J2	0.72717	-0.47489	0.11817	17156			0.43417	0.47891			0.86053	-0.82149	0.43825	0.85866	0.15651	0.4932	0.18191	12794	0.46538	15506	0.074088	23442			0.32687	-0.16207			0.073605	27122	0.041081	36675
ATP5J2-PTCD1	0.56873	0.10945	0.19678	0.85816	0.21226	14259	0.95101	-0.6356	0.35406	0.86726	0.83213	-0.061966	0.46006	0.98077	0.29455	10973	0.85137	-10508	0.38572	19033	0.45307	0.3286			0.95438	-2127	0.48637	-0.98831	0.44345	0.6909	0.18776	13232
ATP5L	0.8204	-0.11265	0.74842	0.49679	0.28377	0.79857	0.5391	0.15865	0.91173	-0.28585	0.17476	11069	0.87132	0.92509	0.80029	0.4627	0.74487	-0.82782	0.59693	0.57978	0.70991	-11875	0.93931	-28497	0.1633	15998	0.6784	0.071187	0.14314	-0.42158	0.82484	-17562
ATP5L2	0.15194	14931	0.19438	0.71548	0.78517	0.085116	0.0068884	10488	0.16384	17247	0.51422	0.44419	0.61429	0.65762	0.05611	14099	0.18822	0.011413			0.48115	0.10533	0.08597	33877	0.081242	22653	0.23168	10559	0.0058421	29224	0.80974	-14864
ATP5O	0.86577	-0.38489	0.99613	-0.8162	0.31864	10886	0.72202	0.21203	0.24035	0.90158	0.33187	0.88044	0.71716	0.43496	0.43452	0.4003	0.94267	0.13666	0.28025	25959	0.85522	-0.45581	0.19581	25379			0.75186	-12867	0.69067	-0.32637	0.21276	12788
ATP5S	0.28028	12194	0.23554	0.44959	0.16122	0.32643	0.33442	-0.46143	0.53558	0.12555	0.35881	0.88737	0.32642	11979	0.75302	-0.45697	0.4089	0.35343			0.44154	-1295	0.38037	0.51127	0.51534	0.10501	0.24135	0.80687	0.31388	0.93422	0.14393	18837
ATP5SL	0.05955	19786	0.57524	-0.13961	0.50031	0.53413	0.34867	-0.28697	0.34625	0.73053	0.45842	0.30874	0.061559	11893	0.93375	-0.69516	0.84891	-14371	0.77578	0.99628	0.66623	-15764	0.77119	-13142	0.88655	-13053	0.88064	-17837	0.37116	0.92323	0.88626	-11251
ATP6AP1	0.34197	-0.14491	0.40708	0.21672	0.34826	0.26011	0.85166	-0.31358	0.2033	14546	0.94105	-0.70198	0.66355	-0.086522	0.54271	0.029674	0.066337	1914			0.85231	-20387	0.12911	23523	0.82437	-0.88593	0.12096	11554	0.49626	-0.18625	0.42626	0.564
ATP6AP1L	0.41984	0.78682	0.35748	0.73577			0.517	0.47508	0.086683	16671	0.46327	0.3203	0.54526	0.81415	0.063322	13099	0.30523	-21251	0.43024	16061	0.37626	0.097373	0.42844	0.7676	0.11894	1781	0.028723	0.90826	0.35539	0.93495
ATP6AP2	0.82757	-0.73361	0.19574	0.98845	0.33759	0.85428	0.39606	0.74913	0.80806	-0.63468	0.76728	0.00033603	0.16079	18465	0.12585	14773	0.016952	15776	0.92297	-22329	0.51031	0.28039	0.45672	0.57855	0.58546	-0.085187	0.756	-0.026343	0.86531	-14834	0.45514	0.027569
ATP6V0A1	0.17496	14666	0.37027	0.53651	0.033022	22382	0.59742	-0.37642	0.65188	0.42859	0.23209	0.69746	0.47136	0.61463	0.081365	16596	0.51978	-0.15412	0.57609	0.73794	0.77376	-0.1883	0.049464	38232	0.67893	-0.64975	0.05266	1855	0.91038	-1.59	0.076094	12507
ATP6V0A2	0.14745	11559	0.30154	0.86881	0.29215	0.67529	0.94364	-0.060827	0.32905	11373	0.022081	11063	0.76531	0.053883	0.065445	15708	0.63691	0.32052	0.67157	11117	0.17382	0.4561	0.48206	0.43403	0.10851	12613	0.71145	0.065426	0.27397	0.29906	0.59359	-0.54749
ATP6V0A4	0.96226	-0.87936	0.93538	-0.68225	0.86158	-0.45721	0.9464	-1055	0.28014	-0.29198	0.31957	10392	0.827	-0.069699	0.81356	0.096511	0.70574	-0.25711	0.08446	40417	0.24652	10429			0.46471	0.08041	0.40383	0.42712	0.92612	-23108	0.35629	0.96657
ATP6V0B	0.16659	10408	0.061537	0.84275	0.76735	-0.20646	0.5576	0.42561	0.34056	0.93038	0.31068	0.29529	0.37607	-0.5267	0.69664	-0.57605	0.18235	0.80982	0.13285	34844	0.66067	0.11602	0.69697	-0.3397	0.043745	14966	0.025428	19606	0.29347	0.88444	0.30435	1397
ATP6V0C	0.30019	11144	0.60434	0.74371	0.020379	19787	0.35336	0.77313	0.11353	18643	0.024336	21625	0.54083	0.52479	0.30967	12029	0.56773	-10577			0.23777	0.12839			0.64656	-10732	0.084156	11971	0.34423	10068
ATP6V0D1	0.10913	15708	0.7402	-0.0028529	0.06069	1086	0.22221	0.70016	0.96081	-0.96322	0.5772	0.84915	0.1817	1247	0.46079	0.45351	0.7092	-0.36911			0.99453	-22418	0.40293	-0.041843	0.76834	-0.94892	0.6434	-15834	0.22735	-0.98535	0.96387	-0.64414
ATP6V0D2	0.17457	15423	0.18654	0.34662	0.3804	0.70541	0.28876	0.47407	0.25709	2028-01-01	0.25768	1376	0.16758	11656	0.86033	0.16792	0.62875	0.0095318	0.68373	0.75864	0.0083002	13318	0.64913	-0.63574	0.69297	-0.8568	0.63564	-0.8112	0.8667	-0.44041	0.60925	-0.74167
ATP6V0E1	0.51307	0.59302	0.0058709	0.75516	0.585	0.21507	0.18272	0.99176	0.030167	24508	0.54751	0.24543	0.94329	-0.11937	0.036269	17885	0.97889	-0.73222	0.57155	0.71759	0.54699	-0.36328	0.42766	0.81677	0.17255	-16233	0.23103	0.92617	0.84848	-12317	0.58979	-0.34334
ATP6V0E2	0.1509	11232	0.99167	-12899	0.25097	10488	0.25349	0.85701	0.79604	-0.41591	0.22958	11139	0.53062	0.75105	0.67381	-0.21005	0.96772	-14594			0.44981	0.53413			0.11825	11522	0.41812	-0.49289	0.046608	26602	0.90734	-0.53395
ATP6V1A	0.90977	-11328	0.60932	0.57888	0.8716	-0.287	0.60185	-0.40319	0.42593	11005	0.53826	0.77964	0.044172	13312	0.65812	0.20711	0.40508	0.44406	0.21729	29102	0.34999	0.3997			0.24959	0.084448	0.03128	0.932	0.27742	0.79236
ATP6V1B1	0.72206	0.095285	0.90966	-0.63611	0.85662	-0.40927	0.83055	0.11822	0.53698	10225			0.59162	0.13964	0.50428	0.040319	0.51504	-0.33254	0.047746	41249	0.21736	13051	0.55598	-0.46092	0.42624	-0.15684	0.95813	-28632	0.49553	0.46453	0.25626	1066
ATP6V1B2	0.71641	0.942	0.68154	-0.81376	0.2289	-11177	0.68012	-0.11465	0.066443	15213	0.037884	13138	0.21303	-0.047901	0.98912	-0.82612	0.39281	-10816	0.66718	0.09599	0.57599	0.39512	0.89887	-24288	0.73769	-11914	0.52926	0.11612	0.52827	-0.016562	0.99958	-3495
ATP6V1C1	0.45144	-0.9051	0.85902	0.39576	0.56234	0.1566	0.52543	-0.45462	0.98798	-19672	0.33987	-0.30909			0.36234	10321	0.8194	-1991	0.51922	11311	0.46886	0.73524	0.34664	12942	0.86446	-14456	0.87545	-0.37048	0.63656	-10122	0.68039	-0.59307
ATP6V1C2	0.70867	0.79471	0.34852	0.72459	0.42142	0.61872	0.022054	14836	0.93441	-0.63292	0.29065	-0.45724	0.2886	12808	0.89941	0.18459	0.2452	0.95521			0.60881	-0.5008	0.47946	0.41944	0.36718	0.75371	0.27103	0.95055	0.50717	-0.23947	0.64622	-0.65153
ATP6V1D	0.10463	13146	0.38983	0.14603	0.070315	23319	0.30898	0.51899	0.25641	-0.48097	0.22058	0.84623	0.63566	0.0039795	0.94245	-0.94206	0.34142	0.78769	0.42788	16912	0.60668	-0.3739			0.43064	0.25107	0.12054	11909	0.093831	24225	0.61603	-0.49022
ATP6V1E1	0.12311	19682	0.0982	12827	0.49779	0.39126	0.17399	0.70633	0.44288	0.71751	0.24619	0.52932	0.63559	0.61697	0.1022	1437	0.44728	-0.34208	0.80353	-0.93615	0.19252	10464			0.65168	0.14866	0.0024768	11389
ATP6V1E2	0.26825	11057	0.26041	0.37177	0.4879	10214	0.26563	-0.080557	0.96517	-0.93871	0.62917	0.66434	0.17766	13356	0.78568	-0.56054	0.91814	-0.86154	0.56825	-0.20602	0.91531	-0.52103	0.5135	0.2132	0.088997	23203	0.68288	-0.62708	0.35045	-0.1364	0.90922	-0.30348
ATP6V1F	0.62893	0.066813	0.246	0.88401	0.54299	0.42583	0.35934	0.29145	0.944	-0.78245	0.35661	10016	0.71264	0.66732	0.95307	-0.61834	0.023092	18756	0.21614	30596	0.77634	-0.39276	0.55872	-0.083028	0.69409	-0.5378	0.61417	-0.96835	0.038319	16588
ATP6V1G1	0.78754	0.13382	0.27926	0.8093	0.28685	0.95438	0.018259	16812	0.58932	0.029042	0.066969	14603	0.72944	0.82666	0.48955	-0.51942	0.6815	-18126			0.49372	-0.31017	0.77019	-14483	0.85339	-21024	0.3743	0.152	0.77803	-14495	0.48942	0.22608
ATP6V1G2	0.66964	-0.29914	0.13218	-0.1368	0.44696	0.090898	0.54254	-0.34739	0.63824	0.093419	0.67484	0.40694	0.8752	-0.07233	0.11632	1529	0.48751	-16466	0.27827	25862	0.099953	10316	0.63956	-0.55678	0.72672	-0.221	0.84629	-12772	0.15413	-11446	0.76534	-0.25407
ATP6V1G3	0.25765	12519	0.86141	0.2281	0.28071	0.99124	0.9891	-11873	0.96501	-0.6198	0.28414	11422	0.65416	-0.055742	0.80415	-0.64892	0.74093	-0.22409	0.12718	36767	0.23995	0.21155	0.54921	-0.012624	0.39357	0.70684	0.6754	-0.71375	0.60588	-0.591	0.67017	-0.78199
ATP6V1H	0.68014	0.16896	0.54752	0.028733	0.71535	0.79482	0.3399	0.016914	0.43866	0.37587	0.77648	0.51554	0.31538	0.75765	0.69232	0.14814	0.7883	-12888	0.70389	-0.14113	0.0064918	1118	0.0046185	57225	0.094888	-0.25522	0.38317	0.4851	0.14828	1942-01-01	0.89544	-23336
ATP7A	0.38581	0.46649	0.94939	-0.66673	0.37067	0.34433			0.74237	-0.15519	0.80657	0.10595	0.33581	10163	0.53011	0.079189	0.36966	0.60774	0.95868	-27664	0.47741	-17816	0.19397	16558	0.58941	-14518	0.84095	-0.71931	0.56831	-0.73111	0.25768	15189
ATP7B	0.54343	-0.36997	0.16978	0.57754	0.84116	-0.8013	0.88607	-0.23607	0.95466	0.14635	0.089908	0.46134	0.37097	0.90481	0.98909	-0.57467	0.8	-10463	0.21882	28736	0.88052	-0.33208	0.92093	-0.64494	0.20058	11593	0.92666	-15352	0.21776	2022-03-01	0.85275	-19611
ATP8A1	0.38774	0.25147	0.10751	-0.10183	0.36162	0.068306	0.67205	0.13232	0.1132	2074	0.72783	0.38123	0.087654	20396	0.49808	0.69922	0.91739	-15226	0.5864	0.64424	0.5977	-0.21279	0.51303	0.82972	0.56485	-0.4509	0.12664	12408	0.7567	-0.39235	0.73762	0.37744
ATP8A2	0.026949	22497	0.44963	0.58931	0.31414	0.91612	0.41	0.30225	0.38773	0.2933	0.41358	10122	0.19341	14169	0.35761	0.96871	0.5041	0.14113	0.7329	0.84144	0.5005	-0.2803	0.32686	1254	0.28242	1016	0.7183	0.42839	0.4616	-0.35318	0.80783	-0.33576
ATP8B1	0.96254	-0.19803	0.19668	0.92205	0.47663	0.27684	0.44217	-0.21361	0.39888	0.61287	0.56486	0.98111	0.4483	0.62598	0.23899	10355	0.94024	-16334	0.45778	13657	0.8548	-0.59849			0.21623	10853	0.34735	-12793	0.39612	0.96333	0.11752	24493
ATP8B2	0.99447	-12295	0.88888	-0.86256			0.85924	-0.3995			0.48296	0.22396	0.88404	-0.39842	0.72972	-0.44913	0.74847	-0.16815			0.1689	0.85773	0.40905	0.9105	0.7782	0.22012	0.042366	23452	0.93776	-18164	0.49131	-0.46366
ATP8B3	0.7688	-0.91247	0.1362	10976	0.90444	-0.80201	0.33831	0.50684	0.2182	13491	0.38918	0.79566	0.66446	0.63655	0.84437	-0.82573	0.49844	0.24677			0.52433	-1413	0.20455	23847	0.80332	-0.074833	0.60343	-0.75963	0.96453	-23609	0.72591	-11166
ATP8B4	0.4665	0.44563	0.38489	-0.0012124	0.81986	-0.66394	0.80083	-0.99427	0.69269	-0.19688	0.42827	0.3721	0.26643	0.061753	0.8786	-0.14487	0.39923	0.6288	0.10259	39575	0.56262	-0.32025			0.77525	-29543	0.9191	-15025	0.66644	-0.91031	0.84512	-0.87559
ATP9A	0.97462	-0.83219	0.21782	0.69713	0.58265	0.75184	0.61238	0.22638	0.83746	-0.71895	0.23173	0.14991	0.55549	0.31888	0.12096	11253	0.34732	-0.47176			0.49333	-25907			0.11106	19857	0.88379	-13716	0.27482	-0.371
ATPAF1	0.67815	0.11726	0.77795	-0.69177	0.66356	0.51033	0.014492	13855	0.12836	-0.12245	0.1067	1436	0.20384	15387	0.76747	0.13659	0.44042	-0.45415	0.16097	0.52366			0.61034	-0.40425	0.90862	-0.68534	0.63935	-0.15284	0.22938	14351	0.73276	-0.6554
ATPAF2	0.91329	-10995	0.95307	0.040641	0.42489	0.73999	0.36287	0.39227	0.54221	-0.19864	0.26241	0.90587	0.97392	-0.77824	0.47368	0.52107	0.16705	11049	0.89469	-0.60073	0.1466	0.96994	0.61589	-0.61875	0.47027	-0.54904	0.23741	10659	0.071706	22806	0.29311	13195
ATPBD4	0.79914	0.74082	0.66971	0.10878	0.57797	0.096956	0.72528	-0.26996	0.86327	0.076532	0.8043	-0.031705	0.21904	14925	0.35172	0.12081	0.72772	-0.93467	0.32407	17141	0.76506	0.15319	0.93452	-23278	0.22272	12128	0.74669	0.00085755	0.79878	-0.17681	0.48934	0.90153
ATPIF1	0.16984	14396	0.11892	1354	0.70723	-0.29836	0.8473	-0.86279	0.085753	19896	0.083867	0.81741	0.97951	-0.86457	0.58344	0.14845	0.50068	-0.27527	0.077055	0.75353	0.51959	0.026572	0.22514	2239	0.093961	-0.35406	0.71789	-0.45659	0.24894	1204	0.16158	23798
ATR	0.84221	-0.082824	0.75557	-0.49132	0.72585	-11986	0.12008	0.82348	0.95027	-0.6555	0.94164	-0.43281	0.62957	-0.4417	0.85557	-0.30338	0.88105	-0.93027	0.598	13894	0.34964	0.046146	0.48743	0.33753	0.54742	0.018449	0.95436	-0.81087	0.64697	-0.63401	0.40458	0.31875
ATRAID	0.21753	16219	0.54193	0.27482			0.89961	-0.80088	0.15419	0.94676	0.16242	0.3438	0.33481	0.62015	0.41218	-0.33152	0.65981	0.33639	0.8834	-17676	0.66697	-11117			0.34584	-0.62618			0.96109	-13794	0.9153	-17537
ATRIP	0.87329	0.33442	0.50651	0.4833	0.63119	-0.10718	0.81972	0.25614	0.083983	0.87199	0.8252	0.6251	0.32664	0.96176	0.75872	0.055182	0.64008	-0.56729			0.89168	-17856			0.3941	-0.30967	0.80556	-1234	0.3508	10242	0.43769	0.50789
ATRN	0.17327	10185	0.95112	-0.36217	0.95475	-0.22955	0.84274	-0.75135	0.19253	-0.23915	0.35429	-0.2736	0.51966	0.42289	0.74393	-0.58612	0.7757	-0.83194			0.94396	-12174			0.31033	-0.72554	0.61353	0.43286	0.30654	0.9337
ATRNL1	0.36918	0.050852	0.12899	10961	0.691	0.039618	0.85811	-0.19557	0.31608	10292	0.20573	12967	0.84217	-0.36731	0.81963	0.12694	0.78972	-0.86341	0.88337	0.13473	0.31769	0.50717	0.42432	0.019309	0.073609	14536	0.41989	0.67902	0.56856	0.38858	0.16941	20687
ATRX	0.81222	0.16815	0.92011	0.12212	0.982	-11446	0.81135	-0.093707	0.39378	0.32487	0.08233	-0.31194	0.48651	0.074754	0.4314	-0.044553	0.60304	-0.72239	0.73853	-0.74985	0.67213	-0.061459	0.92944	-12457	0.79045	0.42263	0.96656	-0.76098	0.78095	0.045297	0.53433	-17567
ATXN1	0.78921	0.07718	0.67487	-0.12611	0.50807	0.25367	0.01885	14624	0.040759	0.34807	0.55612	0.69443	0.49461	-0.067183	0.82141	-0.50581	0.42852	0.5582	0.24448	27914	0.67508	-0.52969	0.042252	11336	0.91616	-15517	0.2521	0.12194	0.21647	11396	0.46175	0.3624
ATXN10	0.39073	0.60969	0.93033	0.17855	0.1808	14277	0.16481	0.9988	0.96843	-0.74589	0.7539	-0.31879	0.72069	0.6188	0.055505	21534	0.23697	0.44418	0.41653	19814	0.52283	0.38822	0.70604	-0.74383	0.070557	13613	0.09532	0.43944	0.75086	-12283	0.69549	-0.93112
ATXN1L	0.031232	22848	0.86213	-0.86473	0.5691	1091	0.96823	-0.42029	0.0028561	43915	0.33947	12789	0.10836	19889	0.19724	0.51592	0.47005	-10919	0.40317	17472	0.90563	-15713			0.43258	0.46555	0.40701	0.48338			0.092844	22396
ATXN2	0.054992	1599	0.063848	0.34047	0.90971	-0.13891	0.77822	-0.83055	0.62563	-0.080947	0.083979	0.88468	0.8493	0.28194	0.58955	0.26745	0.36375	0.77302	0.59631	14767	0.96631	-0.46147			0.099298	-0.29579	0.59278	-10819	0.48808	0.70144	0.096319	0.16891
ATXN2L	0.59715	0.016806	0.84107	-0.29741	0.59016	0.23478	0.94726	-0.35161	0.59475	0.0044651	0.40519	0.41513	0.78402	0.55482	0.86232	0.21144	0.7394	-10754	0.45415	14627	0.31855	0.69769	0.17375	0.80979	0.43717	-0.45471	0.84071	-0.81884	0.62084	0.21577	0.52984	-0.11629
ATXN3	0.98519	-15729	0.97545	-0.78233	0.4262	-0.10056	0.70437	0.20584	0.18315	0.081692	0.83624	-0.016249	0.94782	-0.89279	0.4373	0.727	0.33876	0.64668	0.35302	19817	0.46683	0.37826	0.91299	-16788	0.23206	11481	0.6571	-0.80395	0.92572	-1695	0.33951	-0.98739
ATXN3L	0.51133	0.76282	0.30125	-0.14547	0.34185	0.90682	0.31716	0.38808	0.69142	-0.47575	0.15591	0.47157	0.073076	15382	0.18037	0.27504	0.93323	-0.62196	0.061993	39783	0.92195	-14329	0.80308	-0.93219	0.82156	-16157	0.95858	-13874	0.6872	-0.46024	0.13612	14085
ATXN7	0.67139	0.01874	0.6796	-0.2594	0.0030219	24485	0.0033236	14726	0.88573	-10597	0.56352	0.35283	0.045218	14334	0.045389	11843	0.84358	-0.11711	0.77804	-0.71568	0.16928	0.71752	0.20211	24131	0.97633	-24581	0.39765	-12175	0.83572	-18222	0.3785	11564
ATXN7L1	0.46211	0.41453	0.82561	-0.037681	0.29158	0.94409	0.87456	-0.50005	0.8641	-0.80673	0.59805	0.47518	0.82432	-0.65088	0.55922	-0.50046	0.7232	0.11949	0.54593	0.19157	0.12082	0.68417	0.085176	32838	0.17428	10818	0.6402	0.17944	0.18622	14935	0.29715	13464
ATXN7L2	0.32328	10692	0.23493	0.44776	0.55574	0.1559	0.99683	-13505	0.42979	0.5835	0.21049	-0.33011	0.11304	0.74594	0.77407	-0.1761	0.70827	-0.23119	0.98079	-32536	0.22324	0.63886	0.7761	-14954	0.77029	-0.56718	0.28894	0.44943	0.6167	-16528	0.44317	0.76369
ATXN7L3	0.4544	0.53377	0.71655	-0.24733	0.55105	0.49388	0.71626	-0.13817	0.19074	16331	0.84613	0.070153	0.029374	-0.60181	0.78279	0.19129	0.5192	-0.44758	0.096274	3957	0.58726	0.28133	0.8696	-0.69845	0.98071	-18018	0.38851	0.16478	0.98386	-15931	0.4749	0.14467
ATXN7L3B	0.039867	24105	0.066411	0.65373	0.48633	-0.6249	0.01345	22734	0.45617	0.60432	0.11453	0.7696	0.016234	20199	0.57737	0.10269	0.14371	14201			0.020549	24305	0.06757	40977	0.91087	-0.88297	0.76003	0.20075	0.2775	-13782	0.27988	15257
AUH	0.31919	0.6442	0.40667	0.30912	0.76193	-0.42844	0.43487	0.71887	0.51915	0.6293	0.34482	0.692	0.324	0.85423	0.12941	11155	0.571	-0.50701	0.074337	41764	0.56485	0.28641	0.44036	14809	0.99248	-18197	0.027719	13804	0.98134	-25764	0.63375	-0.54213
AUNIP	0.11298	19096	0.73136	0.65834	0.21999	13406	0.036904	0.91541	0.018798	19771	0.68502	0.45824	0.20453	14816	0.51644	0.6315	0.53394	0.54548	0.35918	18515	0.001258	26744			0.6253	0.54911	0.087836	13598	0.43857	0.29945	0.07329	30888
AUP1	0.034049	15584	0.74475	0.084549	0.23518	0.90753	0.52465	0.27797	0.79793	0.078147	0.82273	-0.64388	0.28701	1951-01-01	0.69221	-0.042119	0.65936	-0.46193	0.92614	-0.47512	0.95893	-15122			0.53439	0.48392	0.1565	11939	0.70867	-0.68349	0.8411	-10009
AURKA	0.99561	-0.46809	0.93898	-0.63342	0.46434	-11303	0.95717	-0.84013	0.23631	0.84255	0.39433	-0.3706	0.52247	-0.091103	0.9767	-10299	0.92499	-0.58561	0.76645	-0.6869	0.73972	-0.62872	0.71965	-10859	0.66228	-0.92595	0.429	0.5637	0.97044	-18744	0.81814	-10094
AURKAIP1	0.23209	0.99078	0.23283	0.84557	0.40009	0.60981	0.85552	0.34057	0.34742	0.98757	0.95745	-0.47188	0.16707	15186	0.1812	0.029054	0.1142	12822	0.26338	26062	0.76879	-0.3249	0.64548	0.2333	0.77578	-0.37015	0.63574	-0.29581	0.93214	-12537	0.43743	0.51842
AURKB	0.81273	-0.20102	0.72898	-21567	0.71954	-0.70004	0.96444	-14619	0.52044	0.43571	0.96501	-14285	0.65289	-0.32351	0.97475	-15098	0.88899	-13645	0.94276	-24904	0.21049	0.56132	0.61741	-19586	0.57514	-0.22829	0.96765	-10609	0.74812	-0.76158	0.7909	-14039
AURKC	0.31025	0.7391	0.50111	0.49475	0.74982	-0.18555	0.98335	-0.63348	0.78931	-0.15735	0.66341	-0.038049	0.92671	-0.57351	0.87098	-0.37177	0.86311	-11936	0.25014	25526	0.92453	-0.4434	0.35487	2018-01-01	0.19388	11895	0.43386	0.55212	0.82583	-16313	0.9548	-12451
AUTS2	0.14023	-0.097689	0.73229	0.079981	0.64984	-0.42538	0.24888	0.78336	0.67659	0.42692	0.25849	0.13043	0.46223	0.93366	0.50832	0.54948	0.38244	0.36133	0.83004	-11875	0.24575	0.66595	0.55106	-0.038113	0.032345	15917	0.7083	0.33126	0.043066	23012	0.78168	-12146
AVEN	0.61352	0.32837	0.91654	0.013611	0.31482	0.8996	0.029191	0.40527	0.79058	-0.54878	0.59906	0.20272	0.15763	1546	0.45405	0.53204	0.41786	0.14844	0.61916	-0.46617	0.41216	-0.099155			0.31976	-0.61049	0.89412	-28291	0.37715	0.40513	0.20921	18135
AVIL	0.95736	-0.62068	0.6783	0.57071	0.18346	1273	0.7694	-0.23812	0.084762	21242	0.63539	-0.75809	0.68026	0.74266	0.91603	-11444	0.68001	0.26261			0.83313	-0.7284	0.69733	-0.93776	0.53663	-12023	0.37427	0.83412	0.47687	0.2014
AVL9	0.38709	0.69178	0.63049	0.5223	0.85409	-1834	0.77457	0.23438	0.21934	10218	0.91752	-0.27183	0.92919	-0.451	0.31386	0.55962	0.66183	0.25791	0.58515	13969	0.94295	-16131	0.7674	-2384	0.62448	-10591	0.96739	-0.98082	0.43322	-0.97816	0.82272	-12031
AVP	0.10481	0.40717	0.07637	0.89792	0.36585	0.85581	0.73458	-0.32876	0.69403	-0.21079	0.56379	0.16829	0.1966	16603	0.14146	17188	0.97764	-10544	0.4741	13859	0.0093286	22434	0.21253	23681	0.059913	-0.017026	0.74999	0.0014666	0.6595	-0.88138	0.57956	-0.25983
AVPI1	0.47163	0.37405	0.20041	0.44826	0.78397	-0.42924	0.12446	0.53212	0.44081	10209	0.79602	-0.58559			0.6924	-0.64432	0.03894	18712			0.93688	-0.38705			0.17009	0.057523	0.54746	0.024647	0.018429	18548	0.15765	22777
AVPR1A	0.335	0.43418	0.5488	0.070178	0.48924	-0.20824	0.80245	-0.36736	0.49988	-0.095033	0.54037	-0.39367	0.20547	10274	0.97214	-0.85285	0.90012	-1072	0.71817	-0.19455	0.52069	-0.48648	0.097795	20876	0.60618	-0.83687	0.61143	-0.99563	0.38745	0.80348	0.17912	0.57477
AVPR1B	0.48476	0.25094	0.34176	0.17538	0.74297	0.094454	0.83483	-0.46871	0.2654	0.035089	0.6611	0.53878	0.28508	0.90742	0.28855	0.48893	0.27582	0.70779	0.56539	0.72403	0.81519	-0.6528	0.99106	-3875	0.75567	-1348	0.50456	0.12599	0.72167	-16939	0.47989	-15723
AVPR2	0.3041	0.7556	0.52901	0.35313	0.18356	0.99039	0.66952	-0.30068	0.5904	0.28618	0.15772	11639	0.68877	-16555	0.33944	0.68417	0.71159	-0.16373	0.85048	0.63176	0.91705	-0.67982	0.93288	-27544	0.87511	-12433	0.22692	0.4548	0.47595	0.091882	0.76082	-10849
AWAT1	0.77509	-0.075227	0.98138	-0.8834	0.19801	11946	0.14476	0.90619	0.83174	-0.73771	0.36967	0.21464	0.27388	12454	0.57827	0.20903	0.14826	0.12174	0.47138	1329	0.62359	-0.61467	0.021425	48388	0.72375	0.35134	0.29189	10643	0.77723	-0.95004	0.10775	20495
AWAT2	0.41492	0.57615	0.83312	0.061005	0.29495	0.34137	0.64581	0.16189	0.12794	17832	0.01677	1548	0.55624	0.92569	0.76503	-0.54544	0.9868	-14039	0.10935	37825	0.9811	-21506	0.32554	14528	0.098069	13287	0.28655	0.7233	0.82589	-1397	0.076823	12394
AXDND1	0.89247	-0.44631	0.94225	-0.4449	0.84636	-0.94434	0.47818	0.3315	0.34351	0.93705	0.6274	0.51738	0.1328	13318	0.73879	0.31504	0.1591	12112			0.13354	-12703	0.17786	28114	0.50325	-0.49346	0.58334	-0.89214	0.72507	-12334	0.57537	-0.49822
AXIN1	0.97456	-0.51188	0.15261	0.51296	0.52249	0.0080286	0.16987	0.41044	0.44377	0.48706	0.34803	0.72506	0.9543	0.35402	0.4106	-0.085358	0.66696	-0.55999	0.75653	0.32232	0.92633	0.011893	0.44602	10248	0.4771	-0.13945	0.65257	-12374	0.18246	0.58254	0.84576	-28292
AXIN2	0.61691	0.54706	0.26619	0.12774	0.13885	14167	0.42138	-0.37998			0.93936	-0.30566	0.50096	0.50865	0.10972	16581	0.18421	0.97852			0.31734	10705			0.11938	-0.21875	0.92039	-0.58157	0.82632	-0.58305	0.61947	-0.51715
AXL	0.25517	-0.74574	0.73353	-11372	0.69771	-0.73275	0.38513	0.39301	0.49833	0.76405	0.65068	-0.30822	0.83747	-0.25271	0.53719	0.33386	0.62639	-14338	0.54934	12741	0.89383	0.038349	0.88918	-0.0051503	0.93701	-2303	0.80422	0.086347	0.86732	-1065	0.2202	1316
AZGP1	0.52194	0.35447	0.77492	0.22328	0.023697	-0.25191	0.22139	0.83548	0.46894	0.049224	0.80431	0.29948	0.73633	-10969	0.38013	0.73141	0.37187	0.60374	0.76921	-0.98814	0.082039	11985	0.55325	-0.051151	0.83199	-10662	0.038989	0.76662	0.042921	15719	0.022907	15127
AZI1			0.51017	0.62142	0.94908	-0.69676	0.33954	0.7603			0.91144	-10165	0.23134	15519			0.081863	0.49531	0.49224	0.89664	0.54903	-0.37851			0.11674	0.87124			0.88542	-15814	0.67279	0.47071
AZI2	0.40883	0.48238	0.17879	0.99565	0.74767	0.076909	0.38361	0.72099	0.043813	26521	0.34155	0.96751	0.085596	18159	0.8078	-0.41365	0.54248	0.40498	0.78833	-0.79502	0.72261	-0.94831	0.83499	-19173	0.67001	-0.98594	0.28317	0.91914	0.44857	-15961	0.90277	-19604
AZIN1	0.9553	-0.84094	0.92009	-11078	0.28125	0.20968	0.21963	0.79063	0.52451	0.11334	0.059139	20499	0.78666	0.40095	0.72642	0.19473	0.80275	-15162			0.21827	0.57929			0.65878	-0.85846	0.037777	2412	0.58781	0.00078665
AZIN2	0.049731	12315	0.19239	0.23512	0.49796	0.66119	0.98697	-0.93308	0.22877	12591	0.36163	0.89626	0.55904	0.081066	0.18166	0.42765	0.32107	0.6574	0.18066	32916	0.23041	12834			0.36148	0.83028	0.26737	0.48427	0.1823	17235	0.9485	-1058
AZU1	0.42464	0.72645	0.62903	0.10461	0.82256	-0.0088702	0.94576	-0.82433	0.46164	0.75156	0.21197	11684	0.93415	-0.4166	0.1563	1003	0.32401	0.6265	0.52574	17601	0.21194	-0.77608	0.087816	34342	0.085429	-0.085164	0.5901	0.48695			0.87	-0.72787
B2M	0.032639	19431	0.85395	0.11309	0.98888	-18506			0.90919	-0.56396	0.8	-0.48835	0.69038	-0.28626	0.19494	10241	0.34682	0.0043483	0.64709	0.23113	0.52584	-0.27015			0.62482	-0.39518	0.093614	17593	0.27028	1149	0.31113	0.51927
B3GALNT1	0.010042	22214	0.32962	0.10182	0.52385	0.49116	0.47139	-0.34962	0.19571	0.51904	0.87643	-0.080653	0.75822	0.5139	0.010184	11461	0.97721	-0.71677	0.1222	16374	0.6264	-11827	0.47567	0.47539	0.1777	0.89252	0.64432	-0.90863	0.43209	0.96047	0.57755	-0.25034
B3GALNT2	0.11797	1836	0.71143	-0.26271	0.75177	-0.34396	0.33746	0.68699	0.32399	11823	0.25052	0.87507	0.1191	20716	0.69038	0.17839	0.23485	10066			0.37373	0.80835	0.83035	-18776	0.79287	-16683	0.84601	-0.075989			0.74569	-12465
B3GALT1	0.34695	0.53841	0.32604	0.70696	0.92591	0.097001	0.2221	0.32759	0.017732	19879	0.17188	12465	0.78711	0.26856	0.079913	13115	0.47078	-16357	0.22172	14522	0.12429	-0.33342	0.44622	0.60983	0.85407	-0.55367	0.57123	0.1684	0.099198	0.073543	0.0095166	18027
B3GALT2	0.92909	-0.28488	0.35739	0.41777	0.20488	10039	0.2269	0.53829	0.93824	-0.75085	0.62615	0.62732	0.50385	0.069286	0.31983	0.7223	0.82065	-0.29458	0.87838	-17158	0.70449	-0.87104	0.91304	-25755	0.12456	15614	0.30138	0.79811	0.34654	1038	0.86075	0.18107
B3GALT4	0.51089	0.91368	0.16935	0.35779	0.84728	-0.75574	0.46977	0.68459	0.34367	10432	0.80745	-0.62413	0.4454	0.43561	0.66848	0.28574	0.58028	-0.64915	0.73547	-0.3919	0.97762	-13363	0.42323	0.78182	0.23494	-0.44082	0.33663	0.84764	0.92063	-0.17713	0.65532	0.36348
B3GALT5	0.82337	0.48719	0.33882	0.54492	0.75211	-0.24259	0.60596	0.20687	0.95194	-14389	0.59031	0.27131	0.3739	0.03359	0.75699	0.37049	0.49912	-0.55142	0.21795	2968	0.056742	0.48605	0.16223	27719	0.63001	-0.99217	0.57664	-0.55571	0.38964	0.53533	0.44884	-10678
B3GALT6	0.41898	0.42099	0.23559	0.82481	0.53825	0.9192	0.28307	10243	0.61771	0.094275	0.15434	0.69894	0.78553	0.052367	0.54787	-0.13978	0.80155	-11533	0.49424	11781	0.36706	-0.17306	0.99243	-39478	0.68161	0.032976	0.69434	-2905	0.074557	17016	0.97487	-32149
B3GALTL	0.5131	0.59852	0.72748	0.50075	0.87501	-0.17274	0.91789	-0.88783			0.64871	0.31746	0.071989	15892	0.25906	0.46967	0.59885	-0.69537			0.30023	0.4276	0.068389	29646	0.53724	0.20002	0.20118	0.80013	0.61303	-0.069441	0.796	-10061
B3GAT1	0.81043	-0.090093	0.61678	0.15942	0.5636	-0.26612	0.50365	0.57895	0.7391	-0.43285	0.25007	10889	0.96594	-14674	0.95587	-0.56465	0.27539	-0.6043	0.11768	10223	0.83519	-0.16257	0.068829	39508	0.19547	0.4125	0.23011	14036	0.47553	-0.4405	0.53248	-0.0028648
B3GAT2	0.26277	10226	0.00092041	1503	0.089827	18133	0.88188	-0.045658	0.70777	0.16046	0.99356	-10891	0.2472	12995	0.030718	-0.34763	0.39008	-0.66722	0.36152	20031	0.14243	12242	0.93112	-2769	0.22354	0.46937	0.86045	-0.9116	0.042294	10634	0.7559	-0.91481
B3GAT3	0.42828	-0.86499	1	-13808	0.7707	0.20332	0.89671	-1136	0.95623	-0.72346	0.88085	-0.46032	0.7093	-0.075083	0.10748	10681	0.52019	0.33377	0.3369	-20178	0.75324	-0.45951	0.52955	0.10092	0.48952	-0.10006	0.12748	0.57298	0.75844	-0.18123	0.1158	0.5574
B3GNT1	0.48432	0.92198	0.93253	-0.017582	0.57237	0.38991	0.3178	0.63009	0.14577	17754	0.9284	0.038227	0.28218	0.78558	0.85102	-0.21524	0.83641	-0.97183	0.20686	29489	0.81302	-0.62165	0.090789	32477	0.86877	-0.48562	0.16001	0.24822	0.25612	-0.86902	0.6374	-0.14922
B3GNT2	0.80147	0.13211	0.20926	0.67572	0.63392	0.12127	0.075163	15295	0.4645	0.93175	0.43177	0.33668	0.65206	0.6382	0.51967	-0.40779	0.87416	-0.38723	0.62337	13708	0.62709	-18982	0.81066	-17315	0.14442	0.98152	0.6185	0.14456	0.24047	0.56723	0.029382	19812
B3GNT3			0.51086	0.23018	0.43119	0.69193	0.32451	0.1459	0.52218	0.54518	0.017544	16283	0.86297	-0.4118	0.14922	10253	0.3399	0.25522			0.56699	-0.39694			0.9517	-11629	0.84749	-11343	0.80445	0.10346	0.2754	11296
B3GNT4	0.21469	11524	0.65604	0.56715	0.008992	30329	0.085574	0.47873	0.028442	18266	0.80048	0.23493	0.99009	-0.44758	0.83002	-0.010396	0.4075	0.35256	0.2284	18571	0.019725	12921	0.59689	-0.30393	0.50863	-0.18087	0.59896	0.21334	0.4884	0.22069	0.95387	-28923
B3GNT5	0.59686	-14015	0.9271	-0.42715	0.8614	-0.98812	0.73324	0.21052	0.53771	-0.46695	0.67101	-0.089114	0.41117	0.82586	0.17243	0.56813	0.67699	0.38081			0.20645	-12356	0.53297	11526	0.95287	-11567	0.49961	0.25112	0.99545	-31342	0.38195	-0.58857
B3GNT6	0.4345	0.65298	0.81722	-0.42354	0.78511	0.20159	0.25127	0.96787	0.69864	-0.32863	0.59233	0.7827	0.29191	11828	0.13924	15614	0.7602	0.27844	0.81898	-10902	0.65032	-17787			0.32241	0.78927	0.035032	0.053545	0.75026	-14059	0.54625	-0.1654
B3GNT7	0.2005	10624	0.77854	-0.93328	0.80516	-0.62146	0.83436	-0.4103	0.85043	-0.92996	0.77222	-0.18811	0.020594	13856	0.47062	0.22799	0.020438	12233	0.6034	13817	0.78964	-0.40455	0.68827	-0.88571	0.11664	-0.1009	0.59664	0.25756	0.14036	12293	0.70654	-0.73595
B3GNT8	0.31812	0.90479	0.93324	-0.78692	0.4653	0.54064	0.32061	0.49784	0.20242	11613	0.49137	0.026326	0.0068019	3324	0.74523	-0.16717	0.10252	0.88811	0.84665	-13765	0.75544	-0.16521	0.89816	-24502	0.25291	0.91764	0.43097	0.097091	0.97621	-12726	0.47291	0.81798
B3GNT9	0.61069	0.81406	0.67545	0.12961	0.68982	-0.062231	0.2114	0.79067	0.70259	0.46247	0.5956	0.72344	0.015752	21846	0.47438	0.13593	0.48046	-0.00054329			0.95809	-0.95469	0.90196	-19875	0.043274	0.71097	0.28853	-0.47247	0.74386	-14025	0.70093	-18692
B3GNTL1	0.13981	0.032381	0.21381	0.012114	0.56596	0.59491	0.99442	-12394	0.68122	0.80533	0.65877	0.64448	0.5068	0.93965	0.47321	-0.16696	0.71246	-0.66114			0.64868	0.46377			0.43352	0.6004	0.0031168	20175	0.23368	-0.67141	0.052952	23668
B4GALNT1	0.34006	10467	0.89374	-0.38542	0.9881	-0.2188	0.28376	0.47587	0.67435	0.61673	0.25452	0.15076	0.14086	12497	0.78502	-0.62174	0.89132	-0.61994			0.36946	-0.085967			0.83868	-0.99875	0.056064	18369	0.42609	-0.19513	0.39229	10577
B4GALNT2	0.26355	13729	0.37854	0.67507	0.51526	0.22221	0.8968	-0.19565	0.64969	-0.12101	0.4538	-0.81782	0.30483	1383	0.43885	0.26606	0.071607	15958			0.59828	0.42563	0.87605	-12779	0.050963	21131	0.42766	0.20121	0.18015	10018	0.92038	-10762
B4GALNT3	0.85443	-0.46416	0.44694	0.5891	0.99463	-0.77905	0.94908	-0.25408	0.1124	17686	0.81438	0.30272	0.16231	15601	0.6569	0.78775	0.7908	-14207	0.27036	25643	0.55469	-0.4065	0.75431	-13349	0.37036	0.17936	0.52064	-0.3378	0.85366	0.088857	0.69736	-0.88988
B4GALNT4	0.86691	-0.0079565	0.80035	-0.2737	0.6949	0.47191	0.18913	-0.2429	0.088479	11489	0.94742	-0.61153	0.70029	-0.45144	0.66803	-0.15506	0.82741	-0.4675	0.57474	0.71315	0.92698	-0.16699	0.014627	52058	0.93978	-1515	0.11905	14958	0.65363	-11316	0.54034	0.69764
B4GALT1	0.30687	0.95484	0.62407	0.23949			0.23339	0.65633	0.11723	19401	0.83152	0.35594	0.30834	1402	0.066473	15057	0.46088	-0.043046			0.79616	-1041	0.060403	42989	0.31602	0.42892	0.016525	15296	0.24548	-0.3293	0.50984	0.11235
B4GALT2	0.64373	0.44278	0.086549	14921	0.90207	-0.44239	0.33005	0.17084	0.076677	23616	0.73424	0.62347			0.82874	-0.53846	0.061541	0.98609	0.48801	13705	0.68626	-0.055718	0.046789	43655	0.36602	0.49991	0.58971	-0.36709	0.6092	-0.60952	0.21042	18104
B4GALT3	0.88012	-0.73239	0.10494	0.56776	0.72624	0.14568	0.70862	-15504	0.78292	-0.56485	0.08862	1455	0.85646	-0.63426	0.64681	-0.18835	0.74119	-0.89116	0.92752	-15742	0.43556	-0.81538	0.89829	-11214	0.67984	0.39455	0.53686	-13999	0.70565	-11381	0.18195	0.189
B4GALT4	0.050118	13003	0.40082	-0.55093	0.75106	0.077593	0.72181	0.50516	0.65788	0.2031	0.61006	-0.74967	0.54376	0.15804	0.84275	0.44805	0.99051	-0.93309	0.85061	-12352	0.5021	-0.16331	0.35756	17643	0.14636	0.67633	0.66641	-21967	0.23538	14908	0.099406	1237
B4GALT5	0.35318	11593	0.03094	-0.18953	0.2261	11744	0.86742	0.20077	0.51201	0.84247	0.077811	11512	0.51442	0.49027	0.87432	0.24911	0.33565	0.69142	0.80356	0.71041	0.71417	0.37067	0.30204	15594	0.8571	0.16408	0.28426	0.96965	0.96928	-11729	0.79254	-1355
B4GALT6	0.60275	0.30693	0.22861	0.93692	0.16664	15797	0.69638	0.38743	0.081544	19326	0.81046	-0.35295	0.39679	10687	0.65534	-0.16003	0.56635	0.34717			0.78813	-0.85696			0.59709	-0.74278	0.81579	0.069687	0.19623	16182
B4GALT7	0.21465	11839	0.1215	0.46431	0.56844	0.1268	0.86758	0.31503	0.84771	-0.30087	0.43313	0.90383	0.61717	0.12354	0.53067	0.60306	0.69799	-0.24969	0.035186	35768	0.77519	0.23819	0.19555	25769	0.46663	0.60343	0.40216	-10678	0.042278	11618	0.67441	-0.80261
B9D1	0.23245	13863	0.068327	14803	0.87074	-0.15652	0.2652	0.87489	0.96522	-15436	0.96331	-0.18461	0.65517	0.33477	0.26852	0.4244	0.26235	0.80226			0.58033	0.34206	0.12091	-0.85131	0.60007	0.48746	0.025037	23938	0.39914	0.17705	0.8362	-13406
B9D2	0.0072863	25093	0.25992	0.13216	0.11453	13598	0.030413	0.91136	0.78591	-0.70466	0.31846	0.75706	0.044085	24484	0.89185	-0.25297	0.52939	-0.33592	0.94164	-12489	0.77873	-0.88817	0.18162	11639	0.27692	0.10559	0.97327	-0.98765	0.84406	-0.25383	0.13275	17464
BAALC			0.84025	-0.37513			0.44297	0.6886	0.66219	-0.17748	0.48362	0.4253	0.37013	0.29257	0.51661	0.22441					0.93037	-15613			0.30434	0.85149			0.18329	11376	0.25179	15285
BAAT	0.0060229	0.25593	0.40674	-0.032621	0.24716	10743	0.78617	-0.5848	0.85105	-0.83253	0.91784	0.030102	0.82706	0.4946	0.88598	0.14524	0.74831	-0.89797	0.44326	15984	0.39961	-0.15914	0.66234	-0.16134	0.032986	16156	0.067593	14808	0.96459	-11088	0.88314	-2234
BABAM1	0.75851	0.064565	0.26176	0.62221			0.10176	11348	0.37184	0.72445	0.018564	17224			0.35926	0.69406	0.30235	0.61503	0.15102	33799	0.29216	0.89518	0.58314	-0.25075	0.7522	-13753	0.46158	0.052983	0.062577	-0.053217
BACE1	0.03554	19252	0.77643	0.19303	0.85196	0.082446	0.78237	-0.43424	0.40925	0.73292	0.42278	-0.82196	0.1552	10468	0.84878	0.11606	0.10575	-0.62798	0.43216	-0.6963	0.66561	-0.86038			0.23577	0.72491	0.41968	-13443	0.4067	0.73599	0.93617	-24141
BACE2	0.61344	-0.075062	0.89702	-0.12004	0.73071	-0.18438	0.37587	-0.54322	0.46284	-0.45389	0.87318	-0.51438	0.48802	-0.25116	0.73368	-0.10002	0.99099	-0.97473			0.55533	-0.65745	0.42828	12472	0.1523	-0.62721	0.57642	-0.87574	0.91779	0.0065336	0.8979	-0.31024
BACH1	0.58609	0.65704	0.52523	0.58183	0.25078	0.94425	0.85377	-10019	0.38027	0.84559	0.27774	0.59451	0.26864	0.55282	0.93685	-0.86163	0.157	10811	0.17166	32307	0.80155	-0.57424	0.22959	2221	0.89264	-15422	0.613	0.48587	0.97207	-15737	0.21106	0.39851
BACH2	0.45054	0.59912	0.88772	-0.39069	0.60243	0.020081	0.60259	0.13035	0.50168	0.44968	0.20058	0.33325	0.30716	13938	0.64526	-0.16267			0.35157	21967	0.54335	-0.025724			0.40834	0.68	0.53588	-0.30486	0.6487	-0.83032	0.58225	-0.27503
BAD	0.72087	-0.69058	0.25955	0.97405	0.75492	-0.68444	0.16917	0.47985	0.43501	0.85482	0.67601	0.34375			0.40675	0.4663	0.6681	-0.80511			0.14268	0.6408	0.56555	-0.069933	0.41841	-12016	0.070183	18082	0.56101	-14357	0.36373	0.89998
BAG1	0.64616	-0.67539	0.99449	-0.77895	0.037646	-13638	0.42103	-0.086532	0.71707	-0.37022	0.72356	-0.52887	0.9494	-0.45226	0.9541	-0.34938	0.93157	-11426	0.50565	11026	0.70199	-0.11829			0.95338	-0.68049	0.76677	-0.97069	0.71669	-15833	0.16893	1537
BAG2	0.44885	0.72607	0.80621	0.22854	0.019554	15087	0.523	0.53383	0.89256	-0.36798	0.72038	-12868	0.12058	13574	0.97407	-0.40238	0.78024	-0.8102	0.9434	-1339	0.97859	-25546	0.43353	11807	0.41288	0.42394	0.091127	-0.98881	0.043755	25723	0.34819	0.99134
BAG3	0.62492	0.58437	0.6028	0.1065	0.39258	0.71081	0.62387	0.62903	0.24469	0.41825	0.61289	0.2661	0.30488	13032	0.11502	12053	0.064854	14753	0.076313	41397	0.032341	0.16779			0.051769	21174	0.83411	-0.74577	0.33537	0.90164	0.12264	16837
BAG4	0.37656	0.60854	0.75132	-0.0033158	0.28597	0.43143	0.55244	0.27451	0.41404	0.96566	0.19866	0.80168	0.9821	-0.10366	0.17076	13196	0.24546	1041	0.1055	3735	0.11786	0.98433	0.34733	13333	0.71346	0.34784	0.00092465	33201	0.46747	0.48803	0.24716	15827
BAG5	0.04664	25349	0.60357	0.40533	0.11254	0.91482	0.46384	-0.044708	0.55503	0.54398	0.50592	0.37853	0.22688	0.74407	0.32154	0.58112	0.78843	0.077627	0.15732	33757	0.14587	12371	0.81805	-15458	0.60927	-0.28325	0.99672	-17022	0.78661	-21463	0.036236	30149
BAG6	0.43394	11726	0.46575	0.42918	0.87	0.18641	0.56019	0.2315	0.77652	-0.39691	0.20279	0.62231	0.3713	0.2897	0.56642	0.38045	0.33945	0.72634			0.38886	0.46206	0.05234	29406	0.27689	0.51565	0.15167	13605	0.56065	-14223	0.36434	12005
BAHCC1	0.21184	0.96813	0.56765	0.27046	0.38567	0.60702	0.65419	0.45002	0.81589	-0.6464	0.8996	-0.97597	0.0012243	0.87949	0.9228	-0.098065	0.17466	0.12005			0.23718	0.19341	0.55759	-0.087198	0.56007	0.57294	0.50264	0.36645	0.62726	0.16884	0.88945	-13471
BAHD1	0.26378	10638	0.36521	0.32055	0.45583	-0.40244	0.56895	-0.14751	0.38481	0.93583	0.20329	1287	0.46154	-0.44471	0.79916	-0.72021	0.52111	0.39254	0.80766	-0.022389	0.43124	-0.55007			0.78119	-15844	0.40515	0.68837	0.41779	0.81231	0.97988	-1021
BAI1	0.73714	-0.50309	0.075164	0.98907			0.80733	0.049307	0.234	13972	0.82821	-0.60787	0.46264	-0.12265	0.93002	-11543	0.51366	-0.1721			0.11674	12689			0.39288	-10949	0.72922	-18436	0.75025	-0.022911
BAI2	0.3122	0.92574	0.42962	0.35327	0.46793	0.76316	0.26068	0.79193	0.14507	0.86128	0.23346	1011	0.80038	0.58137	0.91102	-0.46276	0.16466	2022-12-01	0.29545	18514	0.95141	-0.76945	0.25085	20255	0.42857	0.034369	0.62576	-2447	0.99789	-2607	0.84139	-0.77725
BAI3			0.38487	0.51139	0.4552	0.44993	0.8522	0.037428	0.20635	14693	0.17624	1423	0.73645	0.69255	0.49236	0.2806	0.55555	-0.31015	0.65196	0.21119	0.82788	-11017	0.31697	1484			0.63559	-0.66986	0.88571	-11789	0.79117	-15459
BAIAP2	0.33059	10395	0.42683	0.86262	0.21596	0.50576	0.68742	-0.14656	0.074518	22774	0.96524	-0.15401	0.11589	1717	0.31003	0.035612	0.32531	0.6932	0.9398	-24623	0.14588	11088	0.0053715	44588	0.27118	0.92857	0.54357	-23285	0.82606	0.19124	0.81656	-0.90743
BAIAP2L1	0.62445	0.62978	0.6887	-0.20012	0.37119	0.35688	0.45115	0.25452	0.64589	0.70095	0.073116	16074	0.61807	-0.5357	0.92723	-0.49148	0.29704	-0.41084	0.45563	20783	0.93356	-0.69163	0.5961	-0.32349	0.14436	0.26664	0.18321	0.98836	0.0005467	28917	0.013412	2498
BAIAP2L2	0.3967	0.87939	0.89037	-0.056173	0.99594	-11278	0.00055048	11003	0.91761	-11626	0.66255	0.26883	0.69196	-0.17311	0.76398	0.13279	0.95411	-0.50727			0.058418	18352	0.84449	0.50389	0.23838	0.77264	0.7463	-0.070419	0.56151	0.61486	0.43734	-0.74303
BAIAP3	0.44354	0.74028	0.97095	-0.47659	0.98743	-0.52751	0.11473	0.92642	0.5604	-0.35225	0.90982	0.32708	0.48796	-0.07787	0.80789	0.069331	0.015539	2149	0.70738	-0.18668	0.04153	22459	0.27222	18411	0.90311	-0.42901	0.56623	-1305	0.85635	-0.50785	0.97819	-11652
BAK1	0.051132	17651	0.84157	-0.67339	0.80542	-0.26016	0.4279	0.33905	0.4701	0.47047	0.95676	-13591	0.12588	13035	0.43931	0.15603	0.46293	0.15104			0.50312	-0.1239			0.97946	-15761			0.78437	-0.28152	0.27671	13775
BAMBI	0.084841	18385	0.63988	-0.6501	0.48783	0.79326	0.82728	-0.045593	0.77855	0.79079	0.40013	0.31909	0.44257	0.79444	0.34783	0.92214	0.23084	0.40586	0.54476	12892	0.43951	0.71025	0.377	0.091256	0.49443	-0.296	0.56965	-0.32859	0.15867	15552	0.23019	0.54815
BANF1	0.72918	-0.44021	0.91873	-11102			0.83094	-0.47938					0.49968	0.69548	0.86216	-0.39252	0.86608	-0.98444			0.095378	20698			0.17257	0.88019	0.9664	-31338	0.37624	0.65951
BANF2	0.5461	-0.072697	0.2523	0.85322	0.55934	0.21728	0.16975	0.87562	0.88771	0.31703	0.17713	12729	0.055598	23032	0.96855	-0.41746	0.83909	-0.2604			0.73195	-1135	0.8735	-22401	0.99488	-2802	0.19988	13544	0.23895	14206	0.024478	31879
BANK1	0.81794	-0.3505	0.20223	0.62922	0.98824	-0.49503	0.70674	0.27356	0.052422	15252	0.60825	-0.23014			0.58723	0.87849	0.1381	-0.27349	0.61961	0.42263	0.89268	-0.27943	0.07113	40909	0.77962	-0.16572	0.2763	-0.67327	0.20663	13781	0.40045	-0.56768
BANP	0.031009	26201			0.015255	1959	0.024301	13159	0.28432	12508	0.38415	0.65686	0.30817	0.82158	0.0031375	19051	0.62233	-0.67018			0.33134	0.69699					0.98502	-33752	0.076616	12614	0.17482	14703
BAP1	0.78089	0.5959	0.96198	-0.045109	0.55139	-0.28679	0.13504	0.71611	0.93666	-0.41351	0.99043	-0.73643	0.93966	-0.29533	0.62563	0.27526	0.95649	-0.9768	0.10496	37937	0.3955	0.40711	0.5981	0.69923	0.43339	0.51757	0.99263	-21689	0.96715	-0.81647	0.23063	-0.37333
BARD1	0.16092	0.61768	0.8158	-0.40756	0.13753	-0.31159	0.69524	0.009646	0.27145	11727	0.81944	0.1812	0.34362	11621	0.5938	0.50356	0.58982	0.32233	0.86751	0.12537	0.13718	-13273	0.22868	21501	0.55648	-0.8168	0.77624	0.26383	0.17049	1562	0.88013	-0.75411
BARHL1	0.56261	-0.050118	0.21491	0.96109	0.80429	-0.094862	0.95604	-14368	0.66774	-0.25193	0.59057	0.86167	0.80587	0.21514	0.67213	-0.24068	0.54301	-0.022197	0.42533	16175	0.83839	-0.86348	0.96174	-31313	0.22211	0.76128	0.15184	12416	0.52373	-0.14899	0.24944	0.50714
BARHL2	0.31865	0.90317	0.12323	0.8905	0.63259	0.23651	0.43373	0.59413	0.17641	12446	0.32253	0.54448	0.69517	0.52476	0.49647	0.076375	0.19031	0.11735			0.27997	-0.6783	0.6213	-0.48077	0.11615	11775	0.47116	0.50221	0.75057	-14344	0.085058	21443
BARX1	0.85191	-0.90278	0.74267	0.13867	0.49091	0.90607	0.75448	0.2024	0.19785	13358	0.17393	12458	0.39511	0.4277	0.73474	-0.10147	0.36041	0.69265	0.01877	24765	0.78017	-13804			0.16282	1599	0.44921	0.56869	0.65163	-10726	0.70783	-10052
BARX2	0.11881	17362	0.71697	-0.0070728	0.78295	-0.58723	0.46567	0.23749	0.57876	0.14165	0.9477	-12752	0.4392	0.83974	0.35941	0.98903	0.68513	-0.78777			0.0084258	10712	0.52409	-12963	0.0018456	2361	0.57274	-0.67602	0.48974	0.095982	0.16309	22412
BASP1	0.78303	-0.61783	0.73015	0.22888	0.4523	0.81489	0.68211	0.18377	0.43518	11416	0.13327	14981	0.92034	0.025924	0.76454	0.16447	0.43918	-0.30554	0.6688	0.085794	0.99273	-24758	0.040057	45516	0.54633	-0.82859	0.17176	0.82705	0.68586	-10293	0.13721	24565
BATF	0.41922	0.93123	0.77734	-0.68656	0.95737	-13533	0.93296	-12278	0.86639	-0.94416	0.61617	-0.036563	0.44083	0.61414			0.549	-0.42895			0.50489	-0.20602	0.35323	14151	0.52403	0.62652	0.35212	0.65818	0.24457	15289
BATF2	0.8669	-0.904	0.86855	-0.8324	0.57384	0.088004	0.2844	-0.45454	0.69427	0.32385	0.60491	-0.10001	0.36551	0.78905	0.88992	-10151	0.70626	-0.76447	0.19126	3191	0.573	0.37043	0.64277	-0.02035	0.1614	14737	0.58117	0.38537	0.64577	-0.073139	0.32232	10918
BATF3	0.060374	14998	0.8478	-0.33743	0.18656	1154	0.96409	-0.46565	0.92059	-0.24829	0.060648	-0.1998	0.25116	0.64631	0.095662	0.72866	0.12413	0.36969	0.22637	29134	0.11479	11182			0.54464	-13105	0.75955	-14599	0.84686	-0.86817	0.78763	0.38104
BAX			0.17216	0.97573	0.54388	0.33015	0.3593	0.33753	0.062787	12517	0.53771	0.36729	0.34571	0.92421	0.39407	0.66078	0.41781	-0.18689	0.49469	12401	0.29699	0.97635	0.88428	-0.74458	0.73676	-11743	0.61613	-0.053681	0.13792	21108	0.34611	10876
BAZ1A	0.18529	11152	0.61771	0.10473	0.72548	0.27341	0.82667	0.0043267	0.7566	-0.58923	0.037741	11537	0.65662	0.64867	0.36262	0.42669	0.049521	0.58608	0.76859	0.45868	0.62437	-0.78015	0.83666	-19169	0.2793	-0.28591	0.99283	-11974	0.32773	0.95336	0.22547	15691
BAZ1B	0.99226	-10751	0.22815	0.62441	0.20216	0.10311	0.98965	-0.77774	0.7551	-0.56213	0.61581	0.28524	0.13007	0.85833	0.78186	0.043226	0.12874	0.9392	0.89398	-13894	0.21496	1013	0.91589	-26032	0.47547	-0.071728	0.81937	-0.58442	0.41982	0.69785	0.47087	0.53062
BAZ2A	0.64086	-0.071834	0.023553	15307	0.603	0.38733	0.39266	0.27287	0.69586	0.77546	0.60163	-0.0077425	0.1117	16843	0.23651	10502	0.46933	0.37741	0.92073	-17314	0.64418	-0.068734	0.18482	25481	0.12343	18725	0.55034	-0.28286	0.38887	-21075	0.36431	-0.8307
BAZ2B	0.89484	-0.21136	0.54348	0.48004	0.52991	0.22598	0.81501	-0.66059	0.9238	-0.27123	0.81091	0.31448	0.85151	-0.35995	0.72053	-0.42331	0.65295	-0.15125	0.5419	0.94438	0.85622	-15161	0.27188	1872	0.3504	0.85033	0.40254	0.78162	0.97263	-13539	0.78203	0.61482
BBC3	0.66246	-0.042664	0.91798	-0.57332	0.8951	0.11303	0.12998	10141	0.76483	-0.5492	0.875	-0.084306	0.71893	0.057171	0.18233	0.74787	0.25259	0.80153	0.27192	19203	0.93012	-0.52763	0.59049	0.81442	0.24107	0.96654	0.25571	1064	0.332	0.89721	0.18301	11874
BBIP1	0.23267	0.81257	0.39717	-0.54769	0.83419	-0.14394	0.65073	0.21431	0.39111	0.46937	0.022717	19388	0.37055	10754	0.7132	0.26771	0.0050662	1773	0.80718	-0.9584	0.67282	-14859	0.21131	23842	0.87022	-22679	0.058416	20348	0.1985	0.9593	0.13498	0.96544
BBOX1	0.16272	18023	0.2043	0.94777	0.64918	0.28726	0.0020776	18897	0.24348	14441	0.98036	-0.25763	0.40281	0.75244	0.43115	0.70584	0.67017	-12682	0.29771	24118	0.25026	0.73925	0.26549	0.4932	0.72089	-20059	0.085008	16957	0.15818	19249	0.50688	0.50808
BBS1	0.60519	-0.18207	0.58032	0.29832	0.59101	0.56373	0.88333	0.13814	0.029296	28872	0.72194	-0.26531	0.32453	0.95195	0.60855	0.19081	0.54207	0.25865	0.51514	11533	0.050788	15859			0.41762	0.65224	0.94359	-28751	0.095824	21709	0.83704	-0.63336
BBS10	0.76913	-0.43448	0.10644	11012	0.89404	-0.49127	0.86749	-0.17001	0.011879	21762	0.99571	-0.47101	0.70879	-0.41231	0.021698	13652	0.99694	-22581	0.96028	-15548	0.33265	0.23714			0.19493	10159	0.080208	-0.78165	0.058386	0.30358	0.71378	0.10333
BBS12	0.088397	1587	0.25366	0.89014	0.59677	0.13424	0.41295	0.66416	0.55867	0.22791	0.68734	0.35956	0.78206	-0.42465	0.69292	0.36215	0.0024721	19722	0.029159	47739	0.42325	0.5786	0.70075	-0.22811	0.51982	0.6555	0.28151	1077	0.42863	0.48765	0.23434	1202
BBS2	0.48588	0.367	0.7145	-0.2839	0.003647	41655	0.82222	-0.063924	0.14454	0.52837	0.87198	0.16308	0.46868	0.23594	0.15251	11386	0.12977	13703	0.81922	0.57384	0.70044	-0.49756	0.18201	22796	0.41151	-0.49246	0.71006	0.40593	0.2469	13219	0.69089	0.6465
BBS4	0.96665	-15331	0.88824	-0.70806	0.013289	15394	0.64464	-0.36472	0.019051	31184	0.36709	0.67195	0.83799	0.47386	0.42051	0.68636	0.50419	-0.45642	0.57489	0.12438	0.98457	-12457			0.90288	-17533	0.68403	-0.34085	0.4443	0.76355	0.56015	-12504
BBS5	0.18724	12602	0.15867	0.8948	0.94438	-12263	0.58857	0.36377	0.11132	0.39675	0.21565	10207	0.117	19832	0.37411	0.69311	0.68148	-0.51365			0.049399	10918			0.92368	-29118	0.69662	-0.92705	0.41842	0.35367	0.37326	-0.12625
BBS7	0.97421	-11919	0.58347	0.58131	0.40147	-0.092293	0.21563	0.80069	0.029142	24384	0.35125	0.82549	0.69945	-0.94661	0.25586	-0.90237	0.99897	-1778	0.035574	46325	0.85832	-10456	0.21282	1502	0.2983	-0.10373	0.040502	10107	0.48936	0.47527	0.21901	-0.072461
BBS9	0.12523	11338	0.77623	-0.486	0.902	-0.44136	0.1559	10005	0.48735	0.77885	0.39475	0.62371	0.44197	-0.71537	0.73893	-0.19673	0.53817	-0.88464			0.02494	-1199			0.11643	18169	0.72436	-10718	0.28091	-0.50352	0.8429	-1275
BBX	0.97279	-11313	0.84753	-0.16977	0.9558	-0.56544	0.44775	0.23839	0.64404	0.86891	0.55683	0.39726	0.72851	0.18136	0.8008	-0.377	0.8291	-13387	0.37492	18588	0.16611	12108	0.31762	16576	0.1419	15268	0.67387	-0.14913	0.71465	-11526	0.28474	0.17324
BCAM	0.96636	-0.92989	0.59586	-10033	0.31023	-0.51407	0.49629	0.58473	0.53641	0.15221	0.3512	0.67619	0.91449	-10702	0.47201	0.51828	0.93029	-0.84245			0.3498	0.5539	0.071161	39491	0.12211	1969	0.25706	0.24877	0.23217	0.95106	0.28195	14878
BCAN	0.49882	0.34979	0.11208	11188	0.89428	-0.59136	0.60475	0.045665	0.50203	0.39236	0.30014	1089	0.77645	0.21978	0.87354	-0.92803	0.4116	0.68457	0.19262	15991	0.90622	-0.7053	0.63521	0.07255			0.92964	-21838	0.11609	22334
BCAP29	0.33172	0.97347	0.061786	10031	0.92978	-0.25529	0.47343	0.15614	0.33639	11148	0.38413	0.88277	0.46419	1042	0.13406	17058	0.081484	0.9595	0.056115	3838	0.37734	-0.45789			0.10938	19828	0.53038	-23842	0.0037388	31219	0.29722	12269
BCAP31	0.42569	10395	0.75599	0.15113	0.14717	1121	0.78789	0.042583	0.72367	0.8564	0.27765	11513	0.68474	0.65978	0.050526	16746	0.21143	10662	0.22449	20859	0.36783	0.050325	0.64818	-0.63248	0.21257	10182	0.40579	0.22643	0.82239	-0.15066	0.88466	-0.081219
BCAR1	0.47363	0.70637	0.79752	0.34134	0.22073	0.97032	0.32256	0.78139	0.93997	-0.35455	0.0089702	16024	0.48992	0.90606	0.79051	0.14411	0.45723	0.38209	0.3009	19686	0.42251	0.15101	0.51827	0.193	0.85373	-0.39534	0.5472	-0.01902	0.6832	0.24995
BCAR3	0.78093	-0.496	0.051771	0.86513	0.51011	0.52928			0.091383	19955	0.18413	-0.16609	0.054904	16265	0.44916	0.36236	0.050275	-1318	0.57099	0.99329	0.80051	-0.57911	0.58848	-0.24354	0.56662	-18162	0.70349	-16507	0.40393	0.45534	0.10151	25128
BCAS1	0.98141	-0.56982	0.21867	0.7665	0.69045	-0.12489	0.30881	0.27002	0.94127	-0.53988	0.78747	0.63094			0.055674	-0.61106	0.92766	-17783	0.4271	16716	0.86696	-13121	0.70367	0.084861	0.37995	0.51595	0.18638	-0.92285	0.84174	-20587	0.86288	-11466
BCAS2	0.63828	0.20424	0.0025905	20253	0.1071	19735	0.79046	-0.65981	0.11906	20565	0.62783	0.85743	0.13088	20994	0.56038	0.12065	0.42879	0.52468	0.041012	46211	0.5571	-0.4226			0.48453	0.059423	0.43445	0.63379	0.83785	-0.68684
BCAS3	0.40396	-0.1231	0.22848	10794	0.38761	0.87173	0.6215	0.23411	0.77333	-0.11893			0.80031	-0.52665	0.2981	0.47939	0.52157	-0.89888	0.18031	19766	0.25843	11295			0.66776	-11294	0.087889	16039	0.13134	2062	0.50317	0.14965
BCAS4	0.10821	18343	0.80642	-0.39711	0.20784	12181	0.73929	-0.62764	0.38678	0.72402	0.59837	0.3585	0.49977	0.41959	0.28968	0.84818	0.91233	-28466			0.7575	-15223	0.82993	-18806	0.3221	0.56695	0.45213	0.54497	0.67327	-0.96298	0.16694	21278
BCAT1	0.85933	-0.41076	0.57643	-0.4238	0.019454	27639	0.9824	-0.7091	0.30024	13382	0.25704	12912	0.05758	14439	0.14464	1504	0.32636	0.71173	0.60566	0.52424	0.061697	0.82417			0.14887	1062	0.36405	0.80674	0.81966	-0.30149	0.087354	21756
BCAT2	0.37743	0.23858	0.42668	0.58488	0.72527	-0.078293	0.89685	-0.14187	0.51065	0.37512	0.9267	-0.36704	0.67881	0.36675	0.67861	-0.90015	0.7581	-0.95309	0.62021	0.16128	0.20656	12522	0.99192	-28474	0.17973	0.41818	0.20156	12979	0.91502	-25404	0.27923	13463
BCCIP	0.96838	-11253	0.99521	-0.64545	0.21528	11595	0.59379	-0.5659	0.7705	-0.53887	0.36623	-0.071851	0.29104	0.82276	0.63665	0.6199	0.53902	-0.48193	0.72044	-0.82639	0.32772	10402	0.3799	10295	0.27875	-0.0030076	0.30139	-0.96506	0.61435	-0.48141	0.97339	-31443
BCDIN3D	0.12817	0.95142	0.47661	0.025641	0.085582	11049	0.75667	-0.049533	0.7632	0.27074	0.66681	-0.15586	0.94933	-0.7116	0.36055	0.47886	0.022565	1887			0.59944	-0.23973	0.70942	-10253	0.69559	-12205	0.26198	0.87408	0.19256	16089	0.66214	0.17484
BCHE	0.85481	-0.46822	0.59407	0.2725	0.26904	10352	0.87766	-0.46206	0.89627	-0.55672	0.21519	0.78472	0.23867	0.34233	0.97349	-0.52373	0.34506	0.59421	0.0058536	3622	0.32293	0.62346	0.21191	-0.3876	0.70644	-0.24749	0.013978	1647	0.87978	-0.93787	0.487	0.45078
BCKDHA	0.87869	-0.79363	0.94925	-0.75873	0.22794	11345	0.20401	0.72913	0.26398	14216	0.4326	0.34131	0.76882	-0.65026	0.73332	0.29686	0.66619	-0.6122			0.96992	-23967	0.53876	0.72401	0.3008	10371	0.65699	0.035634	0.7825	0.14979	0.15308	22327
BCKDHB	0.13154	15441	0.22518	0.8	0.11982	0.42759	0.98339	-0.39815	0.15177	1366	0.090868	17911	0.40123	0.56958	0.46473	0.31172	0.90011	-0.083257			0.45036	-0.58568	0.85507	-20767	0.64567	0.17856	0.70126	-12748	0.065727	-0.19738	0.74038	-0.2288
BCKDK	0.053739	0.82752	0.83841	0.20016	0.13918	0.17152	0.92456	-0.062521	0.42703	-0.31145	0.46709	0.24821	0.88748	-0.10217	0.41746	-0.19529	0.69688	0.24045	0.88067	-14839	0.34755	0.65642	0.41424	11751	0.062416	10912	0.68298	0.028659	0.30666	0.49895	0.73915	-0.8626
BCL10	0.43113	0.38669	0.00924	15823	0.31505	11874	0.65638	-0.0012752	0.34553	0.71308	0.29522	0.67324	0.1648	19787	0.2852	0.89026	0.22177	0.64974			0.33035	0.58928			0.94345	-0.72081	0.75431	-16773	0.39805	-0.0041688
BCL11A	0.84099	-0.84884	0.97176	-0.36988	0.26531	0.9922	0.89291	-0.33032	0.56189	-0.62876	0.3328	0.66509	0.3941	0.34148	0.48952	0.034159	0.55385	-0.3269	0.92165	-22226	0.42461	0.063392	0.63941	0.14454	0.08791	21385	0.22446	0.085453	0.18457	18264	0.56474	0.016029
BCL11B	0.80761	0.29334	0.92856	-1098	0.6193	-0.052163	0.88209	-0.24539	0.41727	0.64546	0.17473	-11519	0.3464	0.72468	0.77071	0.25459	0.50765	0.073422	0.44962	21524	0.49289	-0.033847	0.24778	16108	0.27385	0.95023	0.16685	0.97355	0.54557	-15149	0.97743	-31655
BCL2	0.88044	-0.50292	0.61443	0.31601	0.87165	-0.31679	0.58585	0.38254	0.1504	17456	0.81062	-0.46252			0.67622	-0.44261	0.6317	0.13436	0.34294	2156	0.7722	-10135			0.15522	17627	0.27454	0.27772	0.94251	-14604
BCL2A1	0.25236	11273	0.043492	0.61804	0.2598	12265	0.80261	-0.71501	0.3098	0.33022	0.35894	0.62798	0.33697	-0.46884	0.020078	2079	0.75134	-0.069658	0.40957	0.89412	0.37062	-0.66788	0.25859	21302	0.63442	-0.039141	0.93418	-27269	0.58906	0.53079	0.065668	12926
BCL2L1	0.3875	0.9777	0.21429	10047	0.48139	0.48932	0.69949	-0.35549	0.58949	0.069154	0.052993	21992			0.74481	0.18883	0.77923	-0.82142	0.94084	-24702	0.46241	0.14817	0.038454	45739	0.58098	-0.49784	0.68311	-0.37212	0.20989	16339	0.5646	-0.1613
BCL2L10	0.61898	10784	0.66338	0.43193	0.97047	-14912	0.68531	-0.36459	0.8658	-0.47709	0.99261	-0.61126	0.54333	0.39763	0.94387	-0.52518	0.60325	-21362			0.1203	17178	0.43138	0.40089	0.68559	-0.25459	0.57998	0.47899	0.80209	-10526
BCL2L11	0.81803	-0.23853	0.4592	0.37783	0.82741	-0.3681	0.44346	0.16381	0.30941	11439	0.25154	0.50564	0.277	0.80672	0.065793	13609	0.030979	14301			0.42046	-0.5752			0.29567	0.15571	0.20505	12948	0.95232	-0.93407	0.35308	0.97506
BCL2L12			0.80774	-0.64327	0.59621	0.42581	0.064424	16895			0.0030375	32466	0.65411	0.6864	0.24235	0.41196	0.39112	0.60388	0.58541	0.66492	0.81448	-0.98209			0.65315	-0.70102	0.40127	-0.30071	0.62247	0.39047	0.38057	11407
BCL2L13	0.57743	-0.3554	0.50103	-0.69329	0.22439	12426	0.267	21259	0.59021	0.97093	0.24634	12926	0.33195	12137	0.32624	0.82634	0.36749	0.71271			0.49816	-12581	0.75049	-1311	0.94866	-0.84532	0.3728	0.73018	0.084093	25956	0.43294	0.90645
BCL2L14	0.60104	-0.30292	0.96268	-0.18525	0.60196	-0.52573	0.97282	-0.61564	0.61559	0.29354	0.25399	-0.75088	0.36826	0.82898	0.45265	0.66946	0.47663	-0.49368			0.80972	-0.43588			0.62034	-0.96081	0.39042	-0.17124	0.085587	11698	0.61238	-0.31451
BCL2L15	0.69846	0.50779	0.066679	15053	0.74875	-0.39082	0.03557	0.95864	0.51548	0.44334	0.019393	19957	0.41851	0.71976	0.021589	22983	0.53524	-0.0048446	0.91111	-2091	0.98314	-19599	0.23855	21262	0.081476	1307	0.67815	-0.47529	0.90365	-25092	0.071069	29752
BCL2L2	0.4816	0.50351	0.034607	19879	0.66446	-0.11913	0.8604	-0.92688					0.79756	-0.37891	0.046603	16643			0.77368	-0.68675	0.80691	-17411	0.2801	17837	0.10258	21145			0.54815	0.44233	0.17195	21958
BCL2L2-PABPN1	0.47476	0.54709	0.84172	-0.028067	0.74392	-0.36136	0.72435	0.19147	0.88077	0.27802	0.89578	0.11285	0.752	27627	0.65932	0.44833	0.65382	-0.84215			0.32896	0.050431	0.43969	0.72784	0.58164	-0.0076095	0.38018	0.32523	0.33631	11118
BCL3	0.0076806	26319	0.81597	-0.021646	0.11418	1469	0.65312	0.2745	0.17069	19489	0.8248	-0.13697			0.25422	0.40423	0.25781	-0.58841			0.38884	-0.49723	0.97565	-33752	0.93749	-16608	0.19332	14552	0.55634	0.54153	0.68673	0.11824
BCL6	0.57769	0.09283	0.58213	0.65646	0.48607	0.53961	0.91672	-0.43592	0.66773	-0.38815	0.74132	0.37853	0.89767	-0.22246	0.10491	0.036195	0.61058	-11352	0.983	-33137			0.63609	-0.66158	0.12492	18898	0.58776	-0.02867	0.98105	-33836	0.50934	-0.96374
BCL6B	0.26811	14632	0.99305	-0.58192	0.77396	0.17944	0.66741	0.48118	0.49628	0.44262	0.63114	0.53396	0.89244	-0.94954	0.832	-0.67258	0.34317	0.21683	0.12338	36482	0.19285	0.25745	0.091415	23146	0.50201	0.33918	0.049987	11711	0.52472	0.16964	0.66269	-0.37535
BCL7A	0.20407	12256	0.44227	0.41671	0.70597	-0.12666	0.67928	-0.33212	0.2775	0.5658	0.38543	0.73161	0.29827	-0.26152	0.46451	0.28921	0.61086	-15433			0.55179	0.31667	0.1463	30387	0.81769	-18605	0.35827	0.2828	0.73032	-13135	0.50742	0.27177
BCL7B	0.81059	0.1479	0.49118	-0.17054	0.11941	11764	0.81304	0.28409	0.013242	-0.76569	0.91674	-0.094671	0.73681	0.11357	0.7912	-0.35203	0.20013	0.18837	0.79944	-0.89722	0.043943	11778	0.48498	0.41262	0.47875	-0.22437	0.54525	0.44839	0.16128	1395	0.26699	16175
BCL7C	0.026092	10612	0.50766	0.45747	0.86408	-0.1643	0.15345	0.57609			0.35425	0.77991	0.031758	22611	0.32199	-0.60449	0.37376	-0.33055	0.95927	-27756	0.20339	0.98096	0.55771	0.96254	0.014211	24023	0.53326	0.63621	0.30877	-14323	0.15795	22337
BCL9	0.4024	0.73567	0.21859	0.30953	0.36684	0.52798	0.86666	-0.14227	0.97518	-0.0089856	0.95039	-0.15605	0.3165	0.96026	0.53671	0.29123	0.14134	0.70248	0.94776	-0.24325	0.70011	0.473	0.73246	-11792	0.1613	12192	0.062068	0.52372	0.70807	-21437	0.32692	0.80535
BCL9L	0.80676	0.68464	0.86424	-0.3328	0.096149	13986	0.66366	-0.30669	0.40278	0.64455	0.77853	-0.2596	0.47666	-0.033472	0.64538	0.3275	0.043247	12084	0.11276	39055	0.20441	0.57745	0.18957	27175	0.80911	0.1633	0.66687	0.11772	0.2888	-0.22098	0.38058	0.93372
BCLAF1	0.15918	18874	0.70891	0.20315	0.03427	20107	0.45999	0.75267	0.042368	-0.547	0.77582	-0.14783	0.047394	14489	0.51403	0.29652	0.28856	-12392			0.6497	-18444			0.37625	0.56979	0.59766	-0.41347	0.6319	0.46239	0.42098	-0.22018
BCMO1	0.66989	0.5586	0.91703	-0.71914	0.94634	-12553	0.39559	-0.13092	0.58706	0.74858	0.68808	-0.84831	0.57875	-0.20392	0.48769	-0.35833	0.071528	12209			0.066379	0.16597	0.51657	0.18493	0.6564	-18529	0.726	0.27985	0.15986	14053	0.091838	0.057533
BCO2	0.43829	0.87057	0.095518	11922	0.54235	0.90915	0.73574	-0.27431	0.4849	0.35531	0.1641	1039	0.92995	-0.53017	0.75351	-0.31984	0.91632	-0.71674			0.59945	-0.77132			0.92908	-20056	0.95101	-0.0074815	0.9396	-18968	0.42875	-0.076624
BCOR	0.13742	17686	0.47533	0.20185	0.88671	-0.89913	0.020249	25194	0.89729	-0.19191	0.12824	16736			0.88847	-0.40382	0.011194	17853	0.40744	17781	0.44435	-0.46876	0.0017474	48748	0.13261	11474	0.22474	12866	0.068396	26745
BCORL1	0.69443	0.14006	0.3102	0.77177	0.73093	0.19196	0.017107	13815	0.93109	-0.52886	0.41921	0.241	0.68899	0.69102	0.31988	0.79824	0.72213	0.070564			0.8498	-11534	0.47191	0.63116	0.16493	16032	0.59562	0.51556	0.79838	0.17954	0.10539	20493
BCR	0.95064	-0.79306	0.13437	0.51684	0.42732	0.80978	0.00276	19682	0.57244	-0.16927	0.13213	0.84718	0.34679	0.56651	0.23964	0.50266	0.13065	11432	0.35445	21209	0.67325	-0.42941			0.30048	0.6536	0.98165	-0.62991	0.63523	-16303	0.82405	-14244
BCS1L	0.60632	0.16921	0.4499	0.058839	0.99396	-0.75465	0.6252	-0.58384	0.90607	-10202	0.20799	0.23443	0.017229	22744	0.85456	-0.45277	0.06106	-0.74476			0.98127	-17427			0.82356	-13078	0.40217	0.42469	0.20925	-14612	0.41368	11258
BDH1	0.53623	-0.42264	0.83597	-0.3083	0.94272	-0.38429	0.02358	19088	0.63977	0.63259	0.4644	0.41751	0.8309	0.33092	0.83206	-0.71078	0.1998	0.99521	0.5919	14075	0.64414	-0.9623	0.67664	-0.78484	0.45056	0.38942	0.59596	0.45085	0.94114	-10197	0.53397	-0.040814
BDH2	0.91401	-0.64268	0.83351	-0.61566	0.9625	-0.75502	0.436	0.21738	0.18543	14116	0.5544	0.46623	0.34164	11536	0.72986	-0.082831	0.018447	12553	0.92632	-22734	0.75951	-0.54344	0.75152	-13198	0.042477	18787	0.71804	-0.53015	0.65618	-12989	0.39249	10373
BDKRB1	0.92867	-0.72743	0.69112	0.21827	0.95148	-0.51867	0.95759	-0.73882	0.31537	0.46787	0.6979	0.30558	0.77925	0.34069	0.52322	0.38944	0.38702	-14847	0.375	0.82816	0.63453	-0.98313	0.38269	10127	0.59325	-0.39602	0.65051	-22775	0.5277	-0.36391	0.38558	10036
BDKRB2	0.18751	-0.75	0.78202	-0.21766	0.16694	-0.49401	0.79143	-0.1791	0.98014	-0.78147	0.99068	-0.61628	0.62955	-0.10548	0.11664	0.97372	0.44342	-0.39133	0.63562	0.28439	0.74164	-0.90562	0.025425	49579	0.88707	-11233	0.55335	0.34253	0.13552	1223	0.51106	0.31262
BDNF	0.55807	-0.79007	0.13702	-0.45308	0.68003	0.097223	0.65933	0.13404	0.78459	-0.22327	0.77881	-0.091164	0.089674	16914	0.099002	17118	0.28604	-0.24922			0.52152	0.39993			0.38848	0.54587	0.43374	-1865	0.6993	-19712	0.37347	0.23609
BDP1			0.67723	0.17764	0.21366	0.9212	0.14124	0.88937	0.52022	0.13632	0.25288	12243	0.52389	0.51812	0.27227	0.96943	0.91268	-11491			0.44477	-10902	0.64819	-10448	0.11957	-1035	0.032496	25913	0.13705	-0.12839	0.28456	14597
BEAN1	0.3933	0.58832	0.58047	-0.18107	0.68773	-0.29582	0.64352	-0.4167	0.088192	-0.0973	0.86071	-0.79939	0.56166	-0.24114	0.20174	12156	0.61789	0.34654	0.092863	38659	0.60293	-14762	0.46025	0.54115	0.28095	-10011	0.26871	-0.19286	0.21595	14914	0.14039	16679
BECN1	0.30962	0.0057264	0.89058	-0.27661	0.39139	0.35111	0.36457	0.36984	0.30375	-0.41774	0.50555	0.7049	0.19506	13099	0.44116	-0.75011	0.53307	-0.375			0.72645	-19412	0.31174	11314	0.90945	-0.19979	0.91899	-0.14785	0.80576	-0.45309	0.841	-15464
BEGAIN	0.71582	0.044364	0.70102	-0.69632	0.10757	12427	0.5258	-0.21531	0.38494	0.83127	0.063556	12053	0.67485	0.51805	0.75503	-0.033975	0.97413	-16178	0.69177	0.95089	0.61343	-0.58818	0.91856	-26337	0.023906	0.9024	0.53768	0.24422	0.98255	-19951	0.59295	-0.069358
BEND2	0.21268	0.90779	0.19534	0.22593	0.21185	0.43456	0.0071828	0.65631	0.052736	25612	0.34308	0.75948	0.94666	-0.68796	0.59818	0.47329	0.46915	-0.022362			0.44874	-0.62304	0.74993	-12955	0.84362	-0.55034	0.95854	-12613	0.48961	0.64945	0.77239	-14218
BEND3	0.66612	0.43423	0.37463	0.77948			0.21044	12135			0.436	10479	0.0053245	26542	0.89718	0.25912	0.57905	-15151			0.082779	-0.90119	0.26015	19809	0.43816	-0.081206	0.58354	-0.41879	0.62217	-15316	0.67816	0.15615
BEND4	0.74632	0.080594	0.93727	-0.27002	0.24959	11679	0.59939	-0.52361	0.19839	-0.46951	0.26964	0.86946	0.30537	13339	0.17907	11746	0.97772	-15617	0.15402	33321	0.49826	-15447	0.71602	-10732	0.96085	-0.72262	0.14744	-0.35619	0.55967	-0.3162	0.33443	-0.83531
BEND5	0.30566	0.9592	0.37391	0.61458	0.23176	0.98052	0.13676	0.29245	0.81943	0.0066315			0.034805	23746	0.18641	0.99424	0.15849	11172	0.28166	24722	0.032811	0.040326	0.61739	-0.43478	0.22093	0.83638	0.03553	28311	0.30482	10162	0.65015	-0.67385
BEND6	0.78624	-0.037904	0.35867	0.74517	0.24097	0.55794	0.55732	0.20088	0.1392	18509	0.93126	0.11879	0.99777	-0.76647	0.19632	-0.38715	0.081602	11905	0.81616	-10601	0.54587	0.036394	0.88846	-0.12055	0.72926	-10136	0.52681	-0.2624	0.047685	24073	0.43825	0.21787
BEND7	0.54871	0.22343	0.032665	15371	0.75334	-0.27661	0.47787	-0.1967	0.40207	0.92377	0.042533	2449	0.24346	0.56132	0.91356	-0.43079	0.79097	-17541			0.32491	0.48748	0.3201	14583	0.079727	1608	0.51096	0.27539	0.42953	-0.49318	0.73866	-11875
BEST1	0.3071	14168	0.65248	0.38987	0.7797	0.68471	0.84065	-0.73646	0.43365	-10244	0.1021	11732	0.85037	-0.65762	0.67802	0.52682	0.79819	-0.28574			0.94188	-15762	0.11834	20443	0.35366	-0.49975	0.5488	-0.6434	0.7018	-0.90282	0.0045978	10962
BEST2	0.59996	-0.031721	0.071391	13725	0.79875	0.12215	0.40918	0.48236	0.78851	-0.27316	0.65594	0.50146	0.55721	10952	0.55943	0.59116	0.50611	-0.58035	0.10485	37933	0.42991	0.39025			0.014098	18853	0.14564	0.8609	0.62796	-0.046496	0.34247	12488
BEST3	0.80008	-0.06476	0.56511	-10316	0.98244	-0.72289	0.68352	-0.94419	0.43759	0.34726	0.91446	-0.17076	0.91211	0.20432	0.93323	-0.1549	0.9686	-0.52288	0.71173	-0.23449	0.55272	-0.22507	0.12127	3339	0.81217	-18235	0.57213	-0.563	0.82975	-13436	0.60335	-10534
BEST4	0.68137	0.5474	0.20198	0.42511			0.75002	-0.53136	0.10368	21834	0.84535	-0.47114	0.75591	-0.15154	0.45956	-0.43757	0.1281	14861			0.45544	0.54836			0.15838	0.85512	0.37709	0.50679	0.21507	17535	0.43873	0.48642
BET1	0.7	-0.20359	0.8058	0.19165	0.31383	0.94378	0.86524	-0.95045	0.65789	0.16365	0.22864	11144	0.73947	-0.13056	0.28998	0.60932	0.13666	14553	0.17974	32432	0.3803	0.684			0.58184	-0.79248	0.78008	-0.027107	0.1444	0.25864	0.030364	27568
BET1L	0.84944	-0.15663	0.24542	0.13981	0.75876	0.23504	0.8204	-0.63323	0.022758	18738	0.59635	-0.87866	0.83458	0.1823	0.24068	11726	0.5236	0.00056103			0.5572	0.3114	0.75331	-0.56777	0.4386	0.053075	0.39093	0.42072	0.59823	-0.64072	0.44253	0.34091
BET3L			0.46886	0.38199	0.46428	0.45011	0.70941	0.22794	0.47879	0.68758	0.15298	0.9955	0.014893	32177	0.71402	-0.30428	0.39253	0.26169	0.7732	-0.67892	0.98042	-22461			0.77756	-15261	0.8968	-22457	0.43047	0.62741
BEX1	0.41041	0.31206	0.25895	0.12907	0.564	0.18006	0.34393	0.0010091	0.29774	11633	0.52146	0.45673	0.32762	13063	0.015066	20562	0.18108	-0.81535	0.45012	14671	0.9741	-0.80458	0.0051375	57553	0.31384	0.86322	0.1992	12168	0.1396	10455	0.55447	0.34275
BEX2	0.87492	-0.93312	0.65308	0.51379	0.069617	1805	0.64708	0.13662	0.20112	16489	0.69632	0.92865	0.36653	0.92279	0.8263	-0.57034	0.94098	-0.67166			0.38317	0.066875	0.025456	27909	0.14222	-14739	0.68332	-11252	0.034612	28081	0.038233	35925
BEX4	0.31892	1112	0.31133	0.87001	0.23353	1226	0.71692	-0.3052	0.84565	-0.52423	0.10518	16042	0.6747	-0.26512	0.44254	0.88252	0.59421	-0.29797	0.11763	36727	0.83938	-17464			0.76176	-20375	0.49078	0.29509	0.26927	-0.084206	0.79672	-15308
BEX5	0.56193	0.15379	0.98852	-10715	0.11263	18733	0.46755	0.7212			0.76176	-0.33694	0.44041	0.38191	0.49614	0.23019	0.10068	13287	0.19163	31058	0.20333	0.32478			0.87475	-0.77968	0.61753	-20525	0.88236	-11816	0.64437	-0.63758
BFAR			0.80456	-0.324	0.35291	-0.24605	0.24257	0.76092	0.54177	-0.62041	0.37281	-0.15617	0.82329	-0.42768	0.15455	12962	0.95226	-20865	0.54387	16891	0.80305	-0.41119	0.94212	-28645	0.0032838	-0.53637	0.26188	0.95242	0.36055	0.74575
BFSP1	0.95071	-0.34218	0.11877	0.11206	0.4285	0.58298	0.62959	-0.27332	0.74566	-0.40355	0.50947	-0.11732	0.35941	1185	0.19026	0.68846	0.030692	-0.14464			0.95263	-28543	0.64258	0.87001	0.77165	-18257	0.33886	-0.68063	0.20761	0.054484	0.42518	0.97371
BFSP2	0.82625	-0.56748	0.48095	0.38461	0.79396	-0.15898	0.45391	0.62809	0.5058	0.26948	0.44144	0.59948	0.38893	0.34787	0.987	-0.78594	0.41451	0.23196			0.70245	-0.61429	0.56071	-0.089412	0.23865	12098	0.11979	0.57264	0.34218	0.77131	0.81248	0.19474
BGLAP	0.91051	-11153	0.99391	-12249	0.23211	0.91777	0.17474	0.96807	0.92841	0.0039331	0.11128	0.28485	0.78881	0.60979	0.16129	0.50097	0.63543	-0.38868	0.52085	0.51695	0.031091	14888			0.12391	-0.15254	0.072703	23011	0.97054	-31617	0.6711	-10494
BGN	0.27749	0.041161	0.34889	0.16356	0.49838	-0.24956	0.11633	0.64275	0.099359	16124	0.62408	0.70318	0.99397	-0.73379	0.73234	-0.9299	0.84813	-12676			0.65992	-10203			0.82118	-19709	0.84129	-0.37285			0.18425	12052
BHLHA15	0.34468	0.86397	0.87239	-0.90638	0.35155	0.36622	0.54208	0.40462	0.66374	-0.089613	0.14688	10849	0.65442	0.22497	0.80872	-0.41397	0.40335	0.30356			0.67732	-0.42932			0.46229	0.14804	0.19921	13688	0.85996	-0.93898	0.27766	0.93234
BHLHA9	0.61167	0.56549	0.86213	-0.70595	0.41833	0.91273	0.91168	-0.99184	0.079164	21569	0.58733	0.72343	0.78205	-0.57597	0.060973	16451	0.23187	-0.075987	0.39583	16263	0.68286	-0.12639	0.9192	-26445	0.34645	11626	0.2499	12045	0.22793	15622	0.16193	-0.27153
BHLHB9	0.38899	0.4758	0.015581	11352	0.62037	0.55597	0.28797	0.41778	0.29334	11171	0.5707	-0.41234	0.19361	13716	0.54471	0.11157	0.99204	-26131			0.14495	11988			0.46956	-0.24266	0.55661	0.24527	0.51283	0.54324	0.46995	0.82793
BHLHE22	0.61208	0.25302	0.82887	0.38754	0.96474	-0.33004	0.82345	-0.69253	0.93787	-1287	0.38661	0.18127	0.039934	0.44308	0.8796	-0.65949	0.20746	0.50119	0.51146	11362	0.25412	-0.0094392	0.99526	-19401	0.89681	-22736	0.89445	-0.19193			0.55877	-0.15253
BHLHE23	0.55029	-0.097842	0.83805	-0.25191	0.52565	-0.11148	0.65037	-0.27928	0.16186	0.18479	0.31047	0.99568	0.54117	0.47324	0.031951	20007	0.97153	-20732	0.53666	10138	0.5022	0.38988			0.39715	0.67822	0.30342	0.76639	0.77564	0.16136	0.87798	-21795
BHLHE40	0.32779	0.99294	0.49045	0.33751	0.48491	0.44607	0.39903	0.25426	0.2923	0.89726	0.35056	12317	0.028739	21393	0.10173	0.025436	0.089975	0.482	0.3763	18544	0.96575	-0.94442	0.35487	12142	0.64362	-11652	0.37967	0.60893	0.87447	-10117	0.94305	-0.61141
BHLHE41	0.54099	0.76043	0.63032	0.72582	0.38851	10708	0.30622	0.35457	0.20458	0.69536	0.84807	-0.76258	0.77709	0.58234	0.056646	0.18334	0.02883	19629	0.5097	0.74457	0.4518	-0.63862	0.5119	0.22675	0.81335	-18856	0.063302	2022-04-02	0.17563	0.82331	0.5598	0.65355
BHMT	0.71357	0.22551	0.068128	0.5059	0.52363	0.37859	0.98006	-10876	0.19194	-1258	0.7393	-0.19612	0.50682	0.82618	0.44869	0.04801	0.69149	-0.5865	0.56389	14192	0.73878	-0.81541	0.26457	15122	0.94655	-0.88703	0.41685	0.30487	0.1759	15897	0.7976	-0.62817
BHMT2	0.73228	0.56898	0.028364	1033	0.60739	-0.40533	0.99513	-11336	0.59806	-0.84721	0.24935	-0.3773	0.42032	0.61153	0.7923	-0.93834	0.48107	-0.87884	0.79763	0.36923	0.087879	10632	0.13888	29241	0.26408	0.29737	0.64299	-0.027473	0.096302	11187	0.68928	-0.88606
BICC1	0.10272	13928	0.65685	0.18967	0.34273	0.40621	0.20859	10191	0.29888	1475	0.17487	11965	0.71071	0.13225	0.36457	0.9361	0.010455	21935	0.86444	0.15238	0.0048604	24303			0.60965	-0.18288	0.28435	0.48805			0.12425	-12018
BICD1	0.10334	1692	0.32944	0.19059	0.21365	0.029538	0.94774	-0.062432	0.24808	12775	0.61063	0.72625			0.96258	-0.40224	0.85221	-0.46955			0.83088	-10884	0.11186	32578	0.57268	0.3285	0.43746	0.26741	0.83152	-14163	0.49815	0.75329
BICD2	0.84978	0.21373	0.87433	-0.048776			0.79382	0.29654	0.6447	0.16781	0.67228	0.029167	0.23084	13297	0.40817	0.80614	0.73151	0.038545	0.92761	-22825	0.0096125	24349	0.022523	49599	0.71797	-0.90778	0.02935	0.027294	0.57888	-0.083725	0.80391	-15232
BID	0.060319	13748	0.76478	0.49701	0.11212	12779	0.207	23026	0.33419	11258	0.87845	-0.34189	0.64194	-0.36138	0.36115	0.46036	0.59239	-0.51132	0.11501	37141	0.78796	-0.86858	0.38477	10398	0.18335	13638	0.72057	-0.61834	0.96898	-12903	0.01347	10367
BIK	0.36501	0.18552	0.69604	0.059987	0.45002	-0.22247	0.004188	10395	0.72531	-0.153	0.40895	0.26583	0.15552	-10741	0.028432	1315	0.48087	-0.19627	0.71828	0.43834	0.98284	-0.94749	0.99143	-18167	0.9875	-24657	0.92008	0.16861	0.90383	-24876	0.37954	10776
BIN1	0.78091	-0.1353	0.78111	0.59299	0.79507	0.14254	0.61839	-0.48682	0.31683	12182	0.21477	1117			0.40454	0.49278	0.80612	-0.14107	0.48137	12704	0.0044806	2677			0.36709	-0.66986	0.45578	0.36705	0.014833	35954	0.45453	-0.22795
BIN2	0.60716	0.16015	0.97184	-0.71061	0.27009	10383	0.71451	0.53553	0.44613	0.54063	0.2408	0.76837	0.017261	18202	0.43388	0.23185	0.23285	0.15244			0.67494	-0.74492	0.6615	-0.70433	0.13378	17021	0.32801	0.85251	0.8336	-17979	0.085491	23286
BIN3	0.31574	0.30517	0.59529	-0.71001	0.59268	0.34596	0.47401	-0.27749	0.57807	0.56076	0.68937	-0.03998	0.22112	11487	0.45574	0.20562	0.34343	0.52317	0.4451	15134	0.19451	0.97472	0.07248	35559	0.74165	-0.70433	0.24817	0.40617	0.13661	12469	0.96881	-30356
BIRC2	0.44472	10768	0.2691	-0.15209	0.88794	-0.75029	0.94215	-0.26119	0.75852	-0.4092	0.65948	0.53	0.06547	22103	0.72998	0.068796	0.33305	-0.47631			0.53039	-10209	0.35122	12677	0.2801	2018-01-01	0.54542	-0.23804	0.71694	0.086329	0.78625	-0.31199
BIRC3	0.1565	0.71206	0.21972	0.51317	0.26542	0.98071	0.78915	0.23705	0.21344	13686	0.39733	0.2625			0.22438	10963	0.86296	0.10212			0.15028	15691	0.28444	13922	0.20507	0.81819	0.31922	-0.06561	0.14048	19957	0.84523	-0.43758
BIRC5	0.38636	0.82226	0.57528	0.038585	0.9497	-0.54297	0.87697	-0.32871	0.94028	-0.46181			0.94433	-12726	0.23128	12264	0.55024	-0.73974			0.19571	0.71301			0.80818	-10114					0.23711	16163
BIRC6			0.385	0.21086	0.74118	0.067983	0.9534	-0.333	0.006721	27343	0.3546	0.61807	0.22701	0.7954	0.081327	16114	0.34713	0.5546	0.18952	26711	0.076134	14213	0.72021	-0.85333	0.023582	10461	0.31219	-0.50866	0.54944	-0.90133	0.60309	0.65133
BIRC7	0.98664	-0.63477	0.82204	-0.16481	0.68098	-0.73909	0.51307	0.61591	0.031724	14619	0.96944	-0.556	0.42032	0.58127	0.40748	0.49771	0.68287	0.36291	0.19332	3143	0.27677	0.93513	0.035134	25108	0.13412	17715	0.038813	23341	0.44903	-11909	0.92105	-13714
BIRC8	0.74612	0.24912	0.47842	0.62983	0.82934	-0.1296	0.26396	-0.39352	0.36595	0.54839	0.28113	0.54484	0.98154	-11209	0.95928	-14586	0.46209	-0.56141	0.70673	11629	0.7302	-12847	0.58683	-0.25446	0.10127	-0.7313	0.41855	0.063327	0.022555	10608	0.39114	0.93882
BIVM	0.20786	14701	0.81841	-0.10522			0.57181	0.20833	0.17726	1712	0.2372	12102	0.4575	0.71447	0.54058	0.19913	0.86075	-0.98901			0.48384	-0.071529	0.59267	-0.28315	0.67746	-0.30774	0.7228	-17847	0.44956	0.15966	0.33877	0.43316
BIVM-ERCC5	0.45932	0.56429	0.076841	0.57878	0.79689	-0.5379	0.54351	0.58751	0.18342	0.97143	0.014428	18034	0.017291	1611	0.41232	0.46931	0.54498	0.10492	0.75729	-0.53798	0.072703	20451	0.62038	0.49332	0.59416	-0.56208	0.72925	-1156	0.45752	0.67635	0.46848	0.82668
BLCAP	0.68564	0.16763	0.50421	0.12033	0.92265	-0.62599	0.27729	0.25784	0.79348	0.18277	0.53647	0.30654	0.67875	0.48932	0.14127	11992	0.57898	-0.0073836	0.56915	0.76094	0.85984	-0.78967	0.93625	-28202	0.71753	-0.17531	0.34747	-0.60171	0.59603	-0.53253	0.40954	0.73308
BLID	0.46177	0.47306	0.29543	0.29935	0.034989	17044	0.10154	14427	0.11875	15456	0.022357	15364	0.78932	-0.26567	0.77165	-0.44345	0.034285	21514	0.73224	-0.35534	0.96259	-0.95916	0.035359	34449	0.35603	-0.44197	0.97528	-21581			0.12542	11734
BLK	0.63047	0.47334	0.82989	0.3005	0.95459	-0.45665	0.084162	0.61369	0.045349	20668	0.84851	0.33511	0.99226	-0.72956	0.91065	-0.26209	0.31407	-0.47442			0.41163	0.25628	0.57055	-0.030901	0.40284	0.67715	0.84685	-16245	0.49433	0.58184	0.21483	11167
BLM	0.29612	10531	0.56844	0.46643	0.96128	-0.27338	0.67763	-0.23892	0.21734	0.2686	0.78418	0.043911	0.64138	-0.58974	0.47934	-0.38628	0.69485	-0.049197			0.91177	-25113			0.48795	-0.25802	0.45464	-0.086651			0.42445	-0.0088357
BLMH	0.77054	0.19837	0.5419	0.3812	0.35253	0.7253	0.81541	-0.17764	0.17609	0.88287	0.79197	0.69842	0.71232	0.43857	0.49997	0.27744	0.37336	0.53534	0.91414	-21286	0.96526	-10114			0.57013	0.034528	0.23243	11699	0.77073	-27377	0.65163	-11801
BLNK	0.44356	0.62945	0.13695	10157	0.3422	0.71522	0.90491	0.10346	0.1893	10007	0.7677	-0.47369	0.21603	12716	0.24033	10666	0.76324	-0.97192			0.55262	-0.044992	0.70961	0.81226	0.17355	12254	0.17422	1142	0.95589	-16068	0.53676	0.81836
BLOC1S1	0.589	0.58761	0.72279	-0.15377	0.38612	0.69226	0.16926	0.44787	0.78374	0.61835	0.74654	0.47795	0.70226	0.51813	0.21685	0.5626	0.20928	12272	0.21984	22966	0.73055	-13216	0.62522	0.73039	0.89564	-17664	0.36689	0.087608	0.60268	-0.56935	0.80604	-0.31409
BLOC1S2	0.67411	-0.078212	0.75753	-0.65816	0.86156	0.11306	0.98538	-13037	0.057828	24342	0.27752	0.35636	0.36106	0.88518	0.0080367	2697	0.48145	-21846	0.86583	-15727	0.18601	0.9426			0.28683	10603	0.83954	0.10905	0.52832	-0.10507	0.53786	-0.50234
BLOC1S3	0.78896	-0.64146	0.43567	0.8635	0.24748	0.14089	0.033818	0.18027	0.96447	-15323	0.055576	10142	0.46791	0.88532	0.24732	12451	0.78721	-0.90261			0.711	-0.13259	0.17009	27174	0.96197	-21985	0.15807	-10417	0.16378	16803	0.006069	35127
BLOC1S4	0.84162	-0.7584	0.24531	10913	0.50384	0.33321	0.021363	23352	0.22853	14479	0.4233	0.67003	0.13559	20201	0.31437	0.95128	0.76632	-0.13365			0.060861	24012			0.25141	-0.074544	0.3362	0.086187	0.28583	11148	0.94432	-27984
BLOC1S5	0.40187	0.60083	0.16131	0.91021	0.8436	0.29297	0.55606	-0.23021	0.92349	-0.87568	0.49278	0.14466	0.42185	0.40397	0.37714	0.5596	0.56512	-0.21884	0.014718	50879	0.24923	10242	0.54118	0.17991	0.39782	-0.24895	0.75508	-19426	0.49867	-0.0088549	0.1273	17375
BLOC1S6	0.52939	0.29414	0.51184	-0.16794	0.62915	0.36672	0.10409	0.94903	0.5554	12007	0.7545	-0.12726	0.73685	0.65223	0.50144	-0.7313	0.53492	-13173	0.0059566	54239	0.37876	0.077521	0.7696	-0.034165	0.69446	0.42404	0.4801	-0.95757	0.36453	0.2976	0.73566	-13167
BLVRA	0.28211	0.96215	0.29275	0.93764			0.86524	-0.75087	0.22836	0.22335	0.9101	-0.173	0.36242	2022-08-01	0.34038	0.24305	0.16855	12723	0.027616	43836	0.91852	-0.59491	0.15538	11143	0.21997	0.14147	0.30351	0.93578	0.95089	-15458	0.26818	-0.11724
BLVRB	0.34508	10146	0.47856	0.59793	0.35533	0.65186	0.19815	0.90839	0.48263	0.43933	0.17825	11771	0.36948	-0.23418	0.05944	12672	0.14066	1209			0.066856	10968	0.93149	-27737	0.077321	15943	0.31086	-0.24568	0.40717	-0.25302	0.32749	0.69423
BLZF1	0.83124	0.010768	0.31703	0.44575	0.86883	-0.17942	0.093059	11161	0.87965	-0.33749	0.64951	-0.22835	0.24165	0.82565	0.25737	0.82977	0.73793	-0.36859			0.3079	-0.28435	0.26838	18308	0.047318	0.59896	0.21484	0.98685	0.17985	12315	0.86196	-20145
BMF	0.44333	0.31477	0.60712	-0.46262	0.71965	-0.3277	0.36085	-0.3741	0.78944	-0.037832	0.72219	0.095133	0.42393	10245	0.8388	-0.18521	0.24921	-0.37178	0.42597	16583	0.19478	-0.29824			0.85937	-10967	0.056943	17057	0.46934	0.5592	0.67925	-17684
BMI1			0.21182	0.97029	0.39341	10554	0.48951	0.17597					0.12789	10164	0.41679	0.59931	0.48992	0.59021			0.79115	-0.5106			0.78252	-15858	0.63489	-0.67597	0.10444	2299
BMP1	0.73223	0.71737	0.043529	12659	0.086173	-0.89017	0.43615	0.44099	0.16764	14007	0.13278	12009	0.75	0.39541	0.24907	-0.43949	0.50196	-0.16309	0.74812	-0.50425	0.23845	11245	0.90228	-2487	0.48853	-0.054079	0.099109	10425	0.59681	-0.050883	0.069732	22167
BMP10	0.83018	-0.39271	0.86488	-0.092119	0.51194	0.80081	0.50287	0.041658	0.316	0.89298			0.622	0.47799	0.99756	-14549	0.82573	-0.58328	0.41279	14543	0.052965	18551	0.5123	0.43109	0.4043	0.45609	0.99555	-15478	0.16094	10367	0.57459	-0.26246
BMP15	0.54818	0.20618	0.25233	0.11888	0.43789	0.87058	0.80308	-0.0062551	0.72099	0.56184	0.98994	-19116			0.92679	-0.00029453	0.36945	-0.60998	0.28539	26456	0.74399	-0.088643	0.91109	-21861	0.27957	-0.84028	0.30951	0.18783	0.083838	17584	0.74701	-0.9498
BMP2	0.20107	12547	0.50893	0.29323	0.87498	-0.15748	0.78069	0.092717	0.79527	0.47772	0.66882	0.17245	0.79489	0.28814	0.32685	-0.048185	0.66136	-0.67336	0.89956	-0.15147	0.21471	1051	0.61887	-0.47596	0.10456	16289	0.62972	0.029749	0.70931	-14314	0.39309	0.99872
BMP2K	0.60997	-0.27311	0.63077	0.37808	0.15221	0.66166	0.84226	-0.15722	0.58947	0.9955	0.36273	0.8467	0.76132	0.85958	0.93183	-0.78124	0.33402	-11067	0.81776	0.56026	0.090304	14985			0.011092	13382	0.2127	-0.24395	0.039919	0.264
BMP3	0.6253	0.73881	0.77292	-0.34468	0.035681	0.544	0.073774	0.089951	0.33055	11159	0.47745	0.90781	0.64922	-0.29104	0.83976	-0.35623	0.43315	0.17248	0.49544	16031	0.77416	-11311	0.086726	31157	0.37614	0.45477	0.84	-0.10265	0.79268	-0.31719	0.83154	-11969
BMP4	0.65171	0.48794	0.088842	0.87454	0.89751	-0.73046	0.50173	-15809	0.95884	0.094786	0.19034	0.99315	0.39278	0.29418	0.43515	-0.39358	0.44214	0.0087883			0.58471	0.24616	0.41811	-0.80418	0.48256	-0.96274	0.98706	-1421	0.14602	12139	0.47449	-13113
BMP5	0.87919	-0.32799	0.56323	0.07967	0.62878	0.54246	0.54194	0.45701	0.773	0.44258	0.42726	0.84434	0.0051484	22585	0.82668	0.37266	0.96827	-20293	0.99214	-26508	0.88773	-10334	0.034973	31786	0.36047	0.8179	0.98405	-14109	0.01068	27158	0.71911	-0.40364
BMP6	0.069808	0.63036	0.46096	-0.26035	0.55259	-0.25637	0.40234	-0.035101	0.41574	-0.0094748	0.93407	0.13562	0.17786	14705	0.93587	-10015	0.12519	-16184	0.4704	13269	0.62361	0.34379	0.89047	-23757	0.95824	-13183	0.28063	0.070667	0.9237	-2775
BMP7	0.63258	-0.07733	0.0094381	15619	0.81312	0.36425	0.96076	-0.016326	0.30529	-0.19186	0.33293	0.98957	0.34765	2022-08-01	0.23484	1036	0.91659	-0.065554	0.67292	0.0574	0.81094	-0.65997	0.697	-0.87222	0.30166	0.99106	0.10224	14194	0.54806	-0.2817	0.88392	-1995
BMP8A	0.41035	0.64666	0.15086	0.91416	0.36321	0.85015	0.53369	0.24692	0.51258	0.33904	0.58426	0.75106	0.087764	19467	0.29536	0.82534	0.6638	-10364			0.77786	0.047418	0.49153	0.34485	0.93765	-0.97683	0.71275	-0.29545	0.49707	-0.87368	0.82334	-11533
BMP8B	0.21868	13471	0.17656	12688	0.34879	0.66399	0.16468	10247	0.87823	-0.97611	0.0078642	24457	0.024882	23696	0.76735	0.18967	0.31355	-0.6384			0.53932	-0.02	0.86696	-21851	0.96213	-11348	0.13679	0.78084	0.67834	-1363	0.42218	0.97278
BMPER	0.0086311	27618	0.99282	-0.84179	0.61406	-0.23954	0.9366	-0.18446	0.084662	21303	0.93142	-0.52312	0.0028903	14858	0.55714	0.66702	0.84558	-1235			0.95296	-17361	0.48202	0.43653	0.78662	-0.14134	0.42017	-0.39002	0.34313	11177	0.089043	26428
BMPR1A	0.99999	-16919	0.48167	0.40434	0.68377	-0.38042	0.82008	0.010206	0.81846	0.01282	0.79888	0.45892	0.63315	0.61207	0.54425	-10141	0.76867	-0.58377	0.82224	-0.28548	0.24852	0.94764	0.82914	-26032	0.65808	-0.53217	0.22219	11658	0.8521	-0.35836	0.52594	-0.65062
BMPR1B	0.76173	-0.20142	0.49208	0.36013	0.63451	0.31651	0.77152	-0.3981	0.61802	-10405	0.99895	-0.6404	0.83219	-0.51596	0.21423	0.48859	0.7662	-18339	0.37665	13545	0.4106	-0.053096	0.92742	-10603	0.68907	-17227	0.83335	-0.27253	0.42644	-14469	0.58054	0.18403
BMPR2	0.36782	-0.11101	0.27802	-0.22644	0.79895	-0.077989	0.97756	-0.093744	0.91584	-0.85009	0.61502	0.10898	0.36932	0.20233	0.5972	0.054938	0.73153	-0.62839	0.32711	20841	0.026474	16977	0.40614	-0.020502	0.39069	0.71419	0.3293	0.84629	0.97266	-21431	0.73412	0.56523
BMS1	0.80784	0.49748			0.41122	0.2365	0.0074386	15243	0.35106	10614	0.5299	0.31536	0.51924	0.76244	0.12069	12127	0.87531	-13419			0.42409	-0.63769	0.034553	33995	0.31151	10063	0.20099	14125	0.021721	30872	0.21708	0.54727
BMX	0.92602	-0.45014	0.84653	0.037326	0.96085	-13297	0.99348	-0.69948	0.96589	-12315	0.72816	-0.1489	0.92539	-0.87992	0.18042	0.46016	0.39838	0.51371	0.76504	-0.32973	0.69616	-10323	0.70444	0.02687	0.68972	-0.19037	0.67559	-0.16301	0.7144	-0.063321	0.70738	-0.59497
BNC1	0.48806	0.43048	0.18927	0.7929	0.11496	10932	0.25823	0.76391			0.80068	-0.48568	0.37457	0.28097	0.19691	10886	0.86869	-0.62537	0.050373	44879	0.021437	2022-04-02	0.80726	-0.74917	0.88851	0.17438	0.32584	0.28974	0.018912	31326	0.27893	13506
BNC2	0.9093	-10888	0.35662	0.73875	0.44481	-0.41694	0.47282	0.21987	0.68188	-0.15016	0.80553	0.39622	0.94177	-0.43442	0.81111	-0.63405	0.27622	-0.060933			0.15608	0.68294	0.11267	19523	0.58582	0.11091	0.023825	18625	0.084756	25277	0.98143	-25112
BNIP1	0.67293	-0.2234	0.88555	-0.51098	0.6184	-0.0076514	0.31038	0.10335	0.80472	-0.56328	0.44781	0.0040385	0.75729	-0.077472	0.84242	-0.80475	0.12289	0.93837	0.16931	32769	0.20126	14321	0.84599	-0.52068	0.36555	0.57151	0.31178	10275	0.12712	0.97238	0.73533	-10192
BNIP2	0.36542	0.20804	0.29792	-0.2268	0.40928	0.67474	0.88446	-0.60902			0.3188	0.5639	0.78342	0.70248	0.60197	0.33533	0.97856	-11413	0.64236	11263	0.6273	0.36262			0.49976	-0.091674	0.10501	0.63279	0.26201	0.98341
BNIP3	0.27066	11789	0.56841	0.13305	0.46052	0.44592	0.82381	0.29259	0.30746	11029	0.34521	10729	0.087677	16359	0.87929	-0.31327	0.50953	-0.72579	0.25986	1958	0.90279	-0.59851	0.25115	21286			0.70764	-0.35985	0.70113	0.098156	0.079728	0.45702
BNIP3L	0.0084351	2563	0.41001	0.37765	0.22243	12178	0.73241	0.56227	0.078076	23493	0.26642	12807	0.68618	-0.14201	0.43196	0.85942	0.33907	0.4009	0.54783	0.87027	0.21701	0.81201			0.88768	-0.38575	0.56614	-0.33008	0.62882	-0.41422	0.1624	18044
BNIPL	0.70984	0.23148	0.60844	-0.65839	0.75936	-0.70367	0.9761	-0.57876	0.98374	-0.37449	0.67832	0.57906	0.69233	-0.23209	0.99382	-15282	0.85631	-0.68449			0.2072	0.85192	0.27833	17309	0.66185	0.5237	0.87364	-14229	0.52671	-0.69821	0.45922	0.34466
BOC	0.13421	14453			0.86174	-0.79762	0.3306	0.66187	0.35795	0.56845	0.40475	0.75203			0.23652	0.77511	0.10344	0.37381			0.44978	0.098668	0.29826	17534	0.4836	-0.51278	0.70013	-0.47168	0.076669	-0.40201	0.57785	-0.17531
BOD1			0.54143	-0.45074	0.62691	0.64082	0.46116	0.29631	0.012891	25403	0.75791	0.34465	0.41611	0.57996	0.46196	0.26371	0.12109	-0.84948			0.8725	-0.92916	0.66637	-0.72585	0.93114	-0.29101	0.53325	-0.13722			0.38194	0.48033
BOD1L1	0.52709	0.31095	0.30739	0.46142	0.92179	-11065	0.13413	13598	0.45394	0.47243	0.24738	0.89577	0.52094	0.86734	0.92081	-0.58689	0.83448	-0.76022			0.27247	0.95662			0.85704	-0.075961	0.93661	-16281	0.099485	10885	0.77738	-14414
BOD1L2	0.37071	0.95041	0.88712	0.19317	0.46461	0.69604	0.57086	-0.0073292	0.94576	-13523	0.049125	13737	0.47015	11244	0.096093	18065	0.006227	-20843	0.98858	-1956	0.36092	-0.80178	0.2403	15499	0.13178	1768	0.03076	1628	0.69898	-1388	0.71675	-1057
BOK	0.89575	-0.99949	0.27969	10175	0.90614	-0.26329	0.52248	-0.077407	0.20597	0.83353	0.36092	0.7703	0.0055562	1944-03-01	0.46613	0.5327					0.0059969	0.73108	0.37565	10908	0.75019	-14486	0.61886	-0.5926	0.76756	-15174	0.31693	1225
BOLA1	0.74784	-0.1282	0.092364	11799	0.0026548	30681	0.81346	-0.20805	0.14338	2019-01-01	0.9549	-0.35637	0.43311	11351	0.6308	-0.16991	0.55215	-0.9216	0.81836	-0.026402	0.69306	0.18099			0.28456	1095	0.721	-0.73937	0.21451	1118	0.43042	0.91497
BOLA3	0.51904	0.55209	0.88139	-0.21078	0.86382	-0.11172	0.18971	0.93545	0.23877	12483	0.56679	0.63145	0.76153	-0.29971	0.09886	15161	0.98192	-0.90513			0.31093	0.41198	0.66507	-0.72315	0.87152	-19774	0.40659	0.061993	0.25434	0.74311	0.63227	0.58128
BOLL	0.20883	1212	0.42812	0.6454	0.98642	-17768	0.23524	0.68987	0.27905	0.0008639	0.92449	-0.87877	0.032664	0.94263	0.50885	0.2661	0.58841	0.30984			0.90142	-20509	0.18838	-0.33782	0.35217	0.40304	0.64861	-0.17107	0.07811	-0.21987	0.90354	-1512
BOP1	0.75207	-0.52762	0.73137	-0.056563	0.29446	10325	0.084168	0.50762	0.76813	-0.48385			0.83735	-0.46195	0.51403	0.26727	0.79014	0.017021	0.23405	2848	0.050977	19074			0.082194	15242	0.15542	11333	0.7241	-0.28076	0.7619	-13489
BORA	0.7973	0.67851	0.80285	-0.10069			0.76746	0.10901	0.19547	14663	0.16186	11691	0.51038	0.56138	0.86728	-0.9164	0.24549	10248			0.23876	0.51064	0.76454	-14086	0.54848	-0.35175	0.74699	-10923	0.079601	15828	0.83687	-0.5624
BPGM	0.63073	0.43798	0.05042	0.96681	0.76192	-0.66704	0.62325	0.21789	0.70138	0.71424	0.47106	0.47327	0.97795	-0.47343	0.78068	-0.14143	0.050895	12863	0.58426	0.59732	0.56382	-14497	0.55932	0.034553	0.83254	-0.77152	0.66557	-0.54673	0.50201	-2783	0.86887	-24196
BPHL	0.848	-0.11242	0.96305	-0.20924	0.93148	-0.43656	0.58141	0.061181	0.82331	-0.26276	0.88883	-0.016256	0.43027	-0.30783	0.84707	0.26921	0.21764	-0.41302	0.92533	-0.59571	0.66058	-0.45995	0.31887	12864	0.63317	-0.01552	0.13314	1113	0.46471	0.58968	0.84692	-1812
BPI	0.14184	0.9041	0.73728	0.59244	0.24224	12054	0.1878	0.90396	0.65319	0.22639	0.51162	0.37172	0.61456	0.091032	0.21798	11596	0.77037	-10106			0.90612	-0.693			0.87752	-22578	0.073183	-0.91025	0.31872	11072	0.87826	-18479
BPIFA1	0.7429	-0.39521	0.11648	11593	0.42292	10452	0.21566	0.20824	0.9688	-0.73832	0.78164	-0.48697	0.27771	11661	0.51314	0.92017	0.59798	-0.95	0.92244	-0.76086	0.71471	-11528	0.49723	0.31785	0.37237	0.49608	0.33103	0.63275	0.88999	-0.78471	0.80199	-0.23566
BPIFA2	0.70325	-0.43894	0.96755	-0.42768	0.45438	-0.28329	0.18522	0.021122	0.56126	0.45529	0.71521	0.0042161	0.33876	0.75115	0.35234	0.8094	0.59705	-0.2274			0.76439	-0.37529			0.12852	18185	0.38423	0.24235	0.84644	-20689	0.5508	0.42707
BPIFA3	0.81817	0.045189	0.71237	0.4038	0.8393	-0.41608	0.08169	0.81465	0.98396	-0.59723	0.82999	-10569	0.079363	0.74963	0.5105	0.54058	0.71413	-15684	0.74582	-0.47156	0.069646	10246	0.37085	13703	0.38993	0.79442	0.62485	-0.59535	0.93156	-0.91105	0.45905	0.39175
BPIFB1	0.52882	0.67086	0.17058	13402	0.94437	-0.49204	0.78805	-0.01721	0.63902	0.6196	0.37365	11666			0.6867	-0.023811	0.0024524	21362	0.049814	45219	0.2329	12678			0.50437	-0.11426	0.41111	0.45452	0.15207	14827	0.5777	0.37024
BPIFB2	0.65016	0.39305	0.51418	-0.42828			0.85287	-0.21392	0.2302	-10546	0.12316	15922	0.55705	0.41512	0.81311	0.0071482	0.63436	-0.622	0.16345	33379	0.51547	-0.018262	0.66576	-0.73489	0.041248	21056	0.30171	0.39879	0.099991	12005	0.82569	-10312
BPIFB3	0.50025	0.30731	0.026494	0.37011	0.79236	-0.2713	0.91254	-0.00040655	0.15093	17205	0.95884	-0.66584	0.45009	0.93925	0.45613	0.52702	0.31224	0.8317	0.11174	37704	0.085037	13845	0.7644	-14105	0.4889	0.46493	0.6051	0.28477	0.33941	10288	0.64086	-0.029762
BPIFB4	0.98658	-0.54383	0.16729	0.95685	0.8672	-0.15455	0.46374	0.29023	0.33785	0.50619	0.96393	-0.63481	0.18292	14078	0.92212	-0.66622	0.44815	0.073244	0.35372	20281	0.090716	11955	0.46151	1227	0.38944	0.71105	0.75604	-14098	0.31439	0.96728	0.81048	-21794
BPIFB6	0.68097	0.088136	0.14424	11608	0.61559	0.20094	0.6882	0.32854	0.5218	10719	0.2444	1205	0.69658	-0.12706	0.046747	0.90496	0.27445	-0.028665	0.49004	13164	0.20027	10951			0.60568	0.44076	0.31619	0.8055	0.3332	0.88208	0.32536	11583
BPIFC	0.20499	13443	0.43016	-0.014836	0.091272	15724	0.067801	1182	0.79769	0.22905	0.062585	14059	0.63398	-0.6121	0.4138	0.70596	0.87049	-0.43941	0.22142	17156	0.90321	-0.9028	0.41268	0.86397	0.19146	-1346	0.98186	-15999	0.65077	0.060115	0.83493	0.26644
BPNT1			0.50462	-0.31919	0.99307	-2009	0.70933	-0.89196	0.61679	-0.084308					0.70256	-0.25107	0.037102	10773	0.39289	20264	0.13203	17651			0.90714	-0.56955	0.12494	17378	0.52129	-0.66584	0.93596	-26564
BPTF	0.56211	0.78987	0.91662	0.18612			0.76803	-0.50335	0.93655	-0.45972	0.40976	0.97012	0.22258	14468	0.91931	-0.244	0.77822	-0.7085			0.35475	0.91337	0.42792	0.7882	0.20247	1024	0.66614	-0.5733	0.77726	0.38363	0.5317	0.70822
BRAF	0.0014659	17135	0.6991	0.14618	0.93014	-0.40857	1	-19783	0.079099	12868	0.00283	29998	0.73355	-0.23785	0.99164	-11725	0.0011441	17686	0.72239	11381	0.99429	-26491	0.83342	-0.96374	0.00041023	18971	0.56181	0.14842	0.99091	-27877	0.65882	-30292
BRAP	0.71269	0.9129	0.076376	13863	0.051502	12493	0.141	0.39878	0.36071	10895	0.67831	-0.69303			0.66139	0.7575	0.94014	-17055			0.95853	-0.45987	0.68113	-11529	0.77588	-0.39513	0.44953	-15582	0.45227	0.22939	0.60993	0.39853
BRAT1	0.80308	0.56107	0.23086	-0.29377	0.22302	13597	0.53575	0.39188	0.80116	-0.079344	0.64774	0.081099	0.43498	10072	0.07817	13732	0.62674	-11893	0.86716	-15858	0.51157	-11884	0.17051	2792	0.60112	0.49132	0.58517	-0.42482	0.16251	-0.77448
BRCA1	0.70512	0.20107	0.33195	0.063578	0.13536	0.98931	0.71786	-0.29916	0.97981	-11666	0.99865	-16284	0.50253	-0.12948	0.52786	-0.37618	0.98675	-21577			0.82958	-13512	0.95026	-29474	0.55484	-0.19839	0.77709	-10309	0.48313	-15775	0.86969	-16029
BRCA2	0.060435	22564	0.77891	-0.30926	0.61841	0.39179	0.51805	-0.65179	0.14004	0.94378	0.81392	0.15451	0.36019	0.27079	0.6638	-0.33847	0.4704	-0.039997	0.56183	16086	0.63842	-0.42604			0.48801	-0.20958	0.36196	0.80257	0.89529	-24324	0.070353	20644
BRCC3	0.89808	-0.73208	0.95995	-0.18143	0.16345	10559	0.77781	0.24034	0.40796	-0.93924	0.85441	-0.23832	0.94452	-19312	0.096144	0.91101	0.94087	-0.60102	0.99158	-36658	0.91489	-0.35643	0.99413	-40909	0.98738	-24829	0.98906	-0.91428	0.86834	-0.32822	0.80513	-11643
BRD1	0.67315	-0.28326	0.91156	-0.17241	0.55636	0.73618	0.15092	10237	0.092606	0.604	0.21432	10777	0.21879	0.98579	0.88023	0.26372	0.22587	-0.012636			0.3764	-10235	0.41355	14633	0.75727	0.27677	0.15905	15503	0.77719	-10241	0.75232	0.13613
BRD2	0.055257	0.87348	0.88712	-10299	0.5496	-0.23097	0.46435	0.20952	0.24324	0.34244	0.13877	10864	0.59061	-0.054371	0.087235	12384	0.018102	15865	0.93715	0.16086	0.40674	0.2978	0.25125	13584	0.29901	0.78564	0.47958	0.48251	0.12322	17461	0.85409	-15449
BRD3	0.556	0.3486	0.73237	-0.41577	0.99988	-12255	0.64795	-0.35986	0.68019	-0.087662	0.58631	-0.90969	0.83475	0.11576	0.82304	-0.70093	0.61772	-11036	0.83913	-0.69342	0.12321	0.61489	0.19522	23857	0.71992	-0.40683	0.92244	-12108	0.24235	11008	0.3443	0.011959
BRD4	0.95192	-0.27089	0.46984	0.31574	0.53778	-0.26482	0.7544	-0.89676	0.30493	10653	5.38E-06	26911	0.43335	0.88257	0.96857	-0.32163	0.1573	1145	0.57516	14784	0.40757	0.42434			0.2898	0.23765	0.027862	17492	0.66521	-11661	0.97518	-18406
BRD7	0.57515	0.76701	0.25281	0.36321	0.37489	0.82486	0.83169	-0.053974	0.11952	19543	0.95918	-0.64547	0.7192	0.9378	0.31698	10451	0.023342	0.51318			0.0020153	36682			0.61115	-0.64686	0.20603	-11461	0.12782	18378	0.01675	40251
BRD8	0.62711	0.55603	0.68785	0.68977	0.37634	0.76887	0.88833	-0.8891			0.53156	0.81755	0.13161	21316	0.37048	0.79814	0.86469	-18706	0.52395	10534	0.084494	0.97483	0.93447	-2803	0.89371	-23851	0.073215	0.38425	0.15581	0.51941	0.42524	0.59931
BRD9	0.61916	-0.84941	0.98136	-0.77291	0.29575	0.83965	0.39773	0.3052	0.72054	-0.32106	0.99691	-13644	0.14566	0.67007	0.37329	0.49388	0.99941	-1333	0.19865	20723	0.64502	-1454	0.51999	-22391	0.74555	-10166	0.65413	-16955	0.94544	-0.96592	0.24454	0.74902
BRDT	0.5695	0.44606	0.20595	0.74027	0.070939	-0.19049	0.92923	-14605	0.97828	-0.83353	0.33748	0.79867	0.48689	-0.015909	0.26006	-1542	0.38878	-0.046879	0.35572	19145	0.37513	-0.36233	0.58898	-0.57711	0.48337	0.32275	0.51958	0.082536	0.66077	-0.64882	0.58344	-0.084576
BRE	0.81653	-0.58967	0.58113	0.34108	0.1646	0.88677	0.99945	-0.66338	0.76119	-0.70709	0.95645	-0.6672	0.70007	-0.60663	0.19974	-0.12695	0.69126	-0.27083	0.89146	0.35356	0.78277	-0.13633			0.89388	-16383	0.56481	0.028813	0.60694	-0.9247	0.862	-0.55119
BRF1	0.19887	0.70536	0.84952	-0.80385	0.7947	0.28194	0.00012763	2643	0.78291	0.53037			0.82494	-0.2057	0.003021	24197	0.53323	0.14015			0.8883	-0.95587	0.54616	-0.53133	0.34937	-0.076914			0.71701	-0.10055	0.06923	1971
BRF2	0.58379	0.075085	0.96982	-14992			0.1678	-0.53953	0.1431	13666	0.34722	0.98503	0.059671	17931	0.51227	0.23238	0.35123	0.54899			0.99972	-26555			0.29223	0.3536	0.77641	-0.57376	0.71416	-0.031164	0.79557	-1557
BRI3	0.70226	0.31754	0.87157	-0.53407	0.71731	0.47261	0.96004	-0.81431	0.98984	-2037	0.97056	-1.04	0.26717	13259	0.72901	-0.071903	0.090638	10049			0.067391	13906	0.1845	27602	0.90001	-0.37527	0.52007	-0.68785	0.014213	0.34601	0.23996	0.66752
BRI3BP	0.46876	0.48579	0.33614	0.28125	0.65753	0.24582	0.59722	0.39919	0.75648	-0.47183	0.073247	17598	0.59051	-0.058844	0.26844	0.98429	0.60454	-0.34726			0.94781	-0.81488			0.24516	0.89944	0.31638	0.40713	0.19332	13604	0.021081	16462
BRIP1	0.2155	0.98653	0.073254	14687	0.079915	21312	0.52038	0.084421			0.88104	-0.52586	0.16665	13672	0.024606	19993	0.24338	11025			0.247	0.39626			0.84418	-11911			0.6881	-0.054465	0.26321	15784
BRIX1	0.1079	21508			0.063344	25436	0.0204	0.97305					0.87015	-0.85598	0.24929	12624	0.54463	0.063777			0.15117	16922			0.071147	23908	0.27905	0.97729	0.6514	-10553	0.14935	23215
BRK1	0.72145	0.11554	0.3125	-0.24113	0.40822	0.78232	0.51625	-0.5302	0.023625	13993	0.22653	11455	0.18777	12563	0.43085	-0.88437	0.26697	0.62988	0.0074473	53971	0.39495	0.62893			0.23475	12626	0.9195	-11542	0.84006	-23874	0.83709	-0.44915
BRMS1	0.55595	0.18195	0.61833	0.14318	0.095123	16594	0.2215	0.89921	0.50675	0.21368	0.8262	0.02372	0.089216	20287	0.069178	19176	0.18108	0.90251	0.61097	0.5162	0.17129	0.84956			0.47755	0.6571	0.2065	0.037426	0.39754	0.85333	0.74417	-0.20615
BRMS1L	0.8003	-0.074899	0.77384	-0.033407	0.79479	-0.4843	0.30696	0.83389			0.73931	0.35325	0.11015	11948	0.15782	12365	0.90756	-17411	0.84358	-13281	0.10645	12288	0.57766	-0.17273	0.31174	0.9051	0.45872	0.17554	0.83311	-19853	0.72511	-0.42835
BROX	0.029549	19423	0.69622	0.69476	0.035987	26657	0.68937	-11165			0.16318	0.29016	0.55343	0.0039022	0.28226	0.56544	0.15506	0.44677	0.43295	15926	0.51556	0.020812	0.60137	-0.33705	0.17185	0.6529	0.71129	-14678	0.95443	-0.92392	0.74746	-16796
BRPF1			0.18128	10798	0.1655	0.97657	0.076802	0.85899	0.47176	0.51332	0.68144	-0.10812	0.57267	0.62998	0.53719	0.21087	0.38904	0.44474			0.22933	13291	0.64476	-0.59683	0.6675	-0.9643	0.51639	-0.14433	0.11465	1812	0.7365	-0.61014
BRPF3	0.57183	0.11103	0.035302	13678	0.13912	10251	0.020082	17267	0.083525	19349	0.21547	12198	0.26018	13292	0.4544	0.15782	0.98636	-2154	0.36247	20268	0.49062	0.48232	0.29591	17536	0.38018	0.75734	0.75539	-0.22851	0.19852	-0.33527	0.39051	0.45773
BRS3	0.50255	0.2797	0.21342	0.96669	0.5713	-0.023596	0.63085	0.29971	0.95979	-14827	0.62905	-0.31603	0.071111	19648	0.054174	0.95605	0.6718	0.24958	0.034843	46374	0.23538	12133	0.0032555	59222	0.52978	-0.056265	0.081772	0.26493	0.24201	0.59582	0.40403	0.72217
BRSK1	0.42028	-0.043711	0.55578	0.09096	0.36526	0.95525	0.42467	-0.724	0.70736	-0.31783	0.90299	0.44979	0.054196	19434	0.34428	0.99197	0.83528	-10651			0.4941	-0.32939	0.50771	0.080025	0.028538	20335	0.042098	1995-01-01	0.32082	0.96704	0.90449	-24114
BRSK2	0.78855	-0.62991	0.96133	-0.28177	0.090089	12698	0.69552	-0.33158			0.96453	-0.11367	0.91085	-0.51305	0.47772	0.33308	0.08405	2022-11-01			0.60613	0.38649			0.74293	-0.22072	0.043647	14248	0.12757	21445	0.75939	-0.73487
BRWD1	0.39965	0.73808	0.49438	0.41513	0.82233	0.49191	0.018835	14671	0.61563	-0.98477	0.7018	0.23374	0.0016738	0.77841	0.0063973	10958	0.31666	-0.085344			0.15596	0.44028	0.024505	43219	0.024815	0.60249	0.49504	0.29313	0.92432	-20101	0.91878	-16168
BRWD3	0.40456	0.68375	0.083351	13686	0.10074	-0.61753	0.10457	14697	0.25196	11741	0.16448	10891			0.74786	-0.31866	0.035514	0.31863	0.19188	29375	0.062877	22246			0.27614	11333	0.00053064	32717	0.69795	0.60918
BSCL2	0.063609	20564	0.78252	-0.57982	0.31754	11015	0.37111	0.60231	0.49538	-0.16412			0.45591	0.32389	0.62224	-0.0085525	0.072839	14883	0.94937	-26222	0.84148	-0.6329	0.92727	-2735	0.78378	-0.60977	0.57143	-0.87336	0.75194	0.62523	0.99582	-13519
BSDC1	0.14171	13572	0.33276	0.012864	0.24948	11179	0.16485	0.99158	0.65035	0.036879	0.22305	12421	0.74507	-0.2865	0.33344	-0.47559	0.43838	-0.070938	0.063248	42099	0.15675	0.99923			0.0043037	26248	0.43566	0.58639	0.014058	0.69618	0.73672	-0.32666
BSG	0.48188	0.44052	0.45226	0.40488	0.78597	-0.53521	0.88994	-10501	0.65876	-0.080044					0.79544	-0.59294			0.098738	40115	0.75301	-0.37944	0.20914	1821	0.10576	0.9608	0.65918	-0.81704
BSN	0.49962	0.70825	0.88202	-0.95021	0.47463	0.4232	0.94592	-0.66671	0.75949	-0.47049	0.048795	20247	0.3206	11088	0.34949	0.056351	0.079489	16776			0.00034475	25705	0.96439	-31687	0.49725	0.25955	0.20525	12808	0.88108	-17744
BSND	0.70819	0.66747	0.53656	0.020469	0.16064	14766	0.78184	-0.071597	0.55179	-0.61313	0.58907	0.82695	0.46043	0.061879	0.52642	-0.49707	0.44322	-0.21308	0.81808	-10877			0.0054339	21949	0.99302	-3.68	0.33204	0.13274	0.69004	-0.53788	0.28294	14603
BSPH1	0.75192	-0.35504	0.74876	0.13133	0.21617	1197	0.22604	0.018894	0.095723	20247	0.088763	11301	0.58906	0.37558	0.92141	-0.5403	0.25378	-0.67931	0.80476	-0.9248	0.47907	0.36076	0.065502	25988	0.080973	0.80143	0.69645	-0.34532	0.75872	-0.10435	0.010681	42125
BSPRY	0.40764	0.4491	0.23808	0.70813	0.2832	11152	0.29306	0.85893	0.17181	0.72927	0.29644	0.62509	0.13543	16053	0.111	12262	0.65547	0.11262			0.5998	0.26865			0.63257	0.34808	0.36683	0.54554	0.55605	0.14784
BST1	0.7051	0.76791	0.099656	13223			0.13793	10378	0.80487	-0.62453	0.18564	0.57564	0.70633	0.5676	0.063705	12715	0.98361	-16181	0.78722	-10705	0.91086	-12504	0.24175	20684	0.13607	13918	0.85795	-13167	0.98541	-23827
BST2	0.88663	-0.16302	0.70481	0.2107	0.5357	0.37554	0.93813	-0.34988	0.22995	15727	0.74508	0.61969	0.72768	0.8745	0.71152	-0.19444	0.74309	-14229	0.24581	29803	0.041631	0.56945	0.021849	49334	0.19839	-10775	0.17876	15036	0.048858	0.93875	0.40993	-0.13751
BSX	0.037984	25085	0.61366	0.65028	0.98069	-14015	0.84449	-0.29191	0.96601	-0.7907	0.44079	0.46097	0.3742	0.94671	0.91175	-0.26695	0.49042	-0.31988	0.98759	-22453	0.29721	-0.66791	0.037555	44979	0.17409	-0.16223	0.59232	-0.46135	0.68091	-0.70007	0.32874	0.70793
BTAF1	0.39588	0.23442	0.54846	0.18636	0.07565	16289	0.82251	0.093504	0.62292	-0.1002	0.21534	11804	0.37703	0.93421	0.39837	0.56016	0.42336	-0.0020735	0.43782	16008	0.9434	-18102	0.57775	-0.17662	0.1068	21149	0.16196	12996	0.10614	23099	0.77769	-14397
BTBD1	0.089302	19921	0.86317	0.24389	0.51906	0.87015	0.60244	0.49768	0.83565	-0.37481	0.0070952	19058	0.63313	0.011517	0.13708	11672	0.53011	0.59912			0.01728	19758	0.45401	0.60776	0.47978	0.48284	0.53269	0.20738	0.89894	-24933
BTBD10	0.80396	0.33733	0.19818	-0.030717	0.41611	-0.15231	0.7549	0.20152	0.67158	-0.88783	0.82075	0.14274	0.31501	0.69428	0.052877	0.7927	0.50897	-0.1561			0.16327	11306			0.81902	-0.040128	0.32487	0.95952	0.96579	-24273
BTBD11	0.04524	12005	0.27736	0.99729	0.5942	0.050103	0.78462	-0.30107	0.1688	12268	0.76964	-0.14602	0.42584	0.74676	0.59138	0.19567	0.26226	0.91912			0.081235	18115	0.015151	5439	0.41004	0.38031	0.56775	0.54854	0.050202	24276	0.91579	-11133
BTBD16	0.7236	-0.080439	0.18744	0.48067	0.8184	-0.10104	0.82718	-0.21193	0.72303	0.68185	0.69091	-0.21888	0.88678	-0.7124	0.66055	-0.5706	0.58035	-0.10346	0.76584	-0.65362	0.95812	-12174	0.75954	0.047289	0.88562	-0.22878	0.81402	-11084	0.94981	-17193	0.39044	-11042
BTBD17	0.62083	-0.11721	0.090556	15004	0.69861	0.018435	0.62432	-0.3816	0.83795	-0.084756	0.87348	-0.032377	0.078719	19313	0.11104	15962	0.59898	-0.65276	0.45329	1975	0.058323	-0.2234	0.45201	0.70499	0.92427	-0.90337	0.83954	-12862	0.39603	-0.47587	0.50517	0.18188
[truncated: 16,541 more rows]
